# Supplementary material for: A sugar–lectin rich interface between soft tissue and the stiff byssus ofAtrina pectinata
Source: Royal Society of Chemistry journal article supplement (doi:10.1039/c9bm01932d), 2020-01-01
Supplement: c9bm01932d1.xlsx [file c9bm01932d1.xlsx]

## Sheet: Gel fraction 1
Supplementary Table S1. Proteins and peptides identified through MS/MS analysis from each gel pieces.
02_1, Spectrum report created on 04/29/2020
Experiment: 02_1
	Peak List Generator: Unspecified
		Version: Unspecified
		Charge States Calculated: unknown
		Deisotoped: unknown
		Textual Annotation:
	Database Set: 1 Database
		Database Name: the atrina_contam database
			Version:
			Taxonomy: All Entries
			Number of Proteins: 20025
		Does database contain common contaminants?: No
	Search Engine Set: 1 Search Engine
		Search Engine: Sequest
			Version: 1.0
			Samples: All Samples
			Fragment Tolerance: 1.00 Da (Monoisotopic)
			Parent Tolerance: 10.0 PPM (Monoisotopic)
			Fixed Modifications: +57 on C (Carbamidomethyl)
			Variable Modifications: +16 on M (Oxidation), +42 on Peptide N-Terminal (Acetyl)
			Database: the atrina_contam database (unknown version, 20025 entries)
			Digestion Enzyme: stricttrypsin
			Max Missed Cleavages: 0
			Probability Model:
				02_1: LFDR Model, Classifier data: Bayes, Good (50%) m:6.19/s:1.60 m:0.515/s:0.111 m:3.29/s:1.14 m:836/s:527 m:1.17/s:1.48 m:0.479/s:0.189, Bad (50%) m:0.907/s:1.08 m:0.164/s:0.107 m:1.61/s:0.421 m:244/s:178 m:8.53/s:15.0 m:0.257/s:0.137 [all charge states]
	Scaffold: Version: Scaffold_4.10.0
		Modification Metadata Set: 1550 modifications
			Source: /home/sorcerer/data/UNIMOD_DB/unimod_bmsr-2-190626.xml
			Comment:
		Protein Grouping Strategy: Experiment-wide grouping with binary peptide-protein weights
		Peptide Thresholds: 98.0% minimum
		Protein Thresholds: 99.0% minimum and 1 peptide minimum
		Peptide FDR: 0.1% (Decoy)
		Protein FDR: 1.6% (Decoy)
		GO Annotation Source(s):
		Pathway Annotation Source(s): Unknown
		Alternate ID Source(s):
Experiment name	Biological sample category	Biological sample name	MS/MS sample name	Protein name	Protein accession numbers	Database sources	Protein molecular weight (Da)	Protein identification probability	Exclusive unique peptide count	Exclusive unique spectrum count	Exclusive spectrum count	Percentage of total spectra	Percentage sequence coverage	Manual validation	Assigned	Spectrum name	Peptide sequence	Previous amino acid	Next amino acid	Peptide identification probability	SEQUEST XCorr score	SEQUEST DCn score	Number of enzymatic termini	Fixed modifications identified by spectrum	Variable modifications identified by spectrum	Observed m/z	Actual peptide mass (AMU)	Calculated +1H Peptide Mass (AMU)	Spectrum charge	Actual minus calculated peptide mass (AMU)	Actual minus calculated peptide mass (PPM)	Retention Time (sec)	Precursor Intensity	Total Ion Current	Peptide start index	Peptide stop index	Exclusive	Other Proteins
02_1	Uncategorized Sample	BioSample 1	02_1	g.5859 ORF g.5859 m.5859 type:internal len:186 (+) comp243886_c0_seq1:1-561(+)	m.5859	atrina_contam.fasta	20613.8	1	2	2	2	4.18e-05	0.108	possibly correct	TRUE	02_1.37231.37231.2	DTFQAMLLTDGK	R	N	0.997	3.02	0.668	2			670.331	1338.65	1339.66	2	-0.001123	-0.8383	6325.65	359382	379933	103	114	TRUE
02_1	Uncategorized Sample	BioSample 1	02_1	g.5859 ORF g.5859 m.5859 type:internal len:186 (+) comp243886_c0_seq1:1-561(+)	m.5859	atrina_contam.fasta	20613.8	1	2	2	2	4.18e-05	0.108	possibly correct	TRUE	02_1.17029.17029.2	IDSQVILR	K	G	0.99	2.36	0.366	2			472.282	942.55	943.557	2	0.000121	0.1282	3593.98	2815870	1724810	173	180	TRUE
02_1	Uncategorized Sample	BioSample 1	02_1	g.14834 ORF g.14834 m.14834 type:internal len:142 (+) comp254655_c2_seq1:1-429(+)	m.14834	atrina_contam.fasta	15645.7	1	3	3	3	6.27e-05	0.296	possibly correct	TRUE	02_1.16616.16616.2	EGGTDNLITNYQK	K	I	0.997	3.42	0.442	2			726.852	1451.69	1452.7	2	-0.000499	-0.3435	3538.53	996498	1303880	113	125	TRUE
02_1	Uncategorized Sample	BioSample 1	02_1	g.14834 ORF g.14834 m.14834 type:internal len:142 (+) comp254655_c2_seq1:1-429(+)	m.14834	atrina_contam.fasta	15645.7	1	3	3	3	6.27e-05	0.296	possibly correct	TRUE	02_1.53561.53561.2	IDINVFDYTQAFEVGEK	R	T	0.997	4.27	0.585	2			994.486	1986.96	1987.96	2	0.000223	0.1122	9021.19	320503	328029	10	26	TRUE
02_1	Uncategorized Sample	BioSample 1	02_1	g.14834 ORF g.14834 m.14834 type:internal len:142 (+) comp254655_c2_seq1:1-429(+)	m.14834	atrina_contam.fasta	15645.7	1	3	3	3	6.27e-05	0.296	possibly correct	TRUE	02_1.25656.25656.2	LQQSDVAEIEFK	K	V	0.997	2.65	0.491	2			703.862	1405.71	1406.72	2	0.000771	0.5481	4736.7	551470	784357	36	47	TRUE
02_1	Uncategorized Sample	BioSample 1	02_1	g.10675 ORF g.10675 m.10675 type:internal len:236 (+) comp250827_c2_seq1:2-712(+)	m.10675	atrina_contam.fasta	26886.2	1	3	3	3	6.27e-05	0.225	possibly correct	TRUE	02_1.41973.41973.2	EEGNVPLDPVTISDWR	K	Q	0.975	2.07	0.465	2			913.951	1825.89	1826.89	2	0.001753	0.9596	7002.09	83984.4	193707	101	116	TRUE
02_1	Uncategorized Sample	BioSample 1	02_1	g.10675 ORF g.10675 m.10675 type:internal len:236 (+) comp250827_c2_seq1:2-712(+)	m.10675	atrina_contam.fasta	26886.2	1	3	3	3	6.27e-05	0.225	possibly correct	TRUE	02_1.44290.44290.2	GFSGEDIPSLTVGSFQVDQSR	R	V	0.997	2.93	0.575	2			1114.04	2226.07	2226.07	2	1.006	1.279	7338.93	96290.7	183472	153	173	TRUE
02_1	Uncategorized Sample	BioSample 1	02_1	g.10675 ORF g.10675 m.10675 type:internal len:236 (+) comp250827_c2_seq1:2-712(+)	m.10675	atrina_contam.fasta	26886.2	1	3	3	3	6.27e-05	0.225	possibly correct	TRUE	02_1.50468.50468.2	SSAVIQLSPWAVYSFR	K	V	0.988	2.55	0.401	2			905.978	1809.94	1810.95	2	0.001065	0.5881	8394.46	164774	125796	17	32	TRUE
02_1	Uncategorized Sample	BioSample 1	02_1	g.10649 ORF g.10649 m.10649 type:internal len:237 (+) comp250796_c1_seq1:3-716(+)	m.10649	atrina_contam.fasta	26958.2	1	1	1	1	2.09e-05	0.0338	possibly correct	TRUE	02_1.22756.22756.2	DRIPVFIR	R	G	0.987	2.11	0.379	2			508.306	1014.6	1015.6	2	0.00029	0.2855	4348.43	1290140	696645	186	193	TRUE
02_1	Uncategorized Sample	BioSample 1	02_1	g.17337 ORF g.17337 m.17337 type:complete len:207 (+) comp256092_c4_seq1:125-745(+)	m.17337	atrina_contam.fasta	23216.4	1	3	3	3	6.27e-05	0.204	possibly correct	TRUE	02_1.56002.56002.2	GELVSLDEVLGLLR	K	D	0.997	2.92	0.646	2			756.935	1511.86	1512.86	2	-0.000878	-0.5804	9679.26	89190.5	116712	75	88	TRUE
02_1	Uncategorized Sample	BioSample 1	02_1	g.17337 ORF g.17337 m.17337 type:complete len:207 (+) comp256092_c4_seq1:125-745(+)	m.17337	atrina_contam.fasta	23216.4	1	3	3	3	6.27e-05	0.204	possibly correct	TRUE	02_1.40385.40385.2	VSAEGSVDTIFAEVEK	K	Y	0.997	2.98	0.605	2			840.918	1679.82	1680.83	2	-0.004022	-2.393	6772.74	154471	132815	184	199	TRUE
02_1	Uncategorized Sample	BioSample 1	02_1	g.17337 ORF g.17337 m.17337 type:complete len:207 (+) comp256092_c4_seq1:125-745(+)	m.17337	atrina_contam.fasta	23216.4	1	3	3	3	6.27e-05	0.204	possibly correct	TRUE	02_1.21113.21113.2	VVFVVGGPGSGK	K	G	0.976	2.12	0.166	2			551.817	1101.62	1102.63	2	0.000188	0.1705	4131.83	463212	522210	21	32	TRUE
02_1	Uncategorized Sample	BioSample 1	02_1	g.17332 ORF g.17332 m.17332 type:complete len:368 (+) comp256205_c2_seq1:153-1256(+)	m.17332,m.17333	atrina_contam.fasta	41479.6	1	4	4	4	8.35e-05	0.136	possibly correct	TRUE	02_1.10549.10549.3	AAQFcQQLESEREK	K	A	0.997	3.01	0.381	2	c5: Carbamidomethyl (+57.02)		575.274	1722.8	1723.81	3	-0.0002083	-0.1208	2734.5	526077	380663	223	236	TRUE
02_1	Uncategorized Sample	BioSample 1	02_1	g.17332 ORF g.17332 m.17332 type:complete len:368 (+) comp256205_c2_seq1:153-1256(+)	m.17332,m.17333	atrina_contam.fasta	41479.6	1	4	4	4	8.35e-05	0.136	possibly correct	TRUE	02_1.16748.16748.3	HVEPVEYIPR	R	L	0.997	2.16	0.44	2			413.556	1237.65	1238.65	3	0.00078	0.6297	3556.18	314593	102056	158	167	TRUE
02_1	Uncategorized Sample	BioSample 1	02_1	g.17332 ORF g.17332 m.17332 type:complete len:368 (+) comp256205_c2_seq1:153-1256(+)	m.17332,m.17333	atrina_contam.fasta	41479.6	1	4	4	4	8.35e-05	0.136	possibly correct	TRUE	02_1.35537.35537.2	TVELDTFLDDK	K	A	0.997	2.36	0.507	2			648.322	1294.63	1295.64	2	0.000171	0.132	6090.1	181589	204486	113	123	TRUE
02_1	Uncategorized Sample	BioSample 1	02_1	g.17332 ORF g.17332 m.17332 type:complete len:368 (+) comp256205_c2_seq1:153-1256(+)	m.17332,m.17333	atrina_contam.fasta	41479.6	1	4	4	4	8.35e-05	0.136	possibly correct	TRUE	02_1.16268.16268.3	VSDEDGSLDMDEIKR	K	G	0.997	4.07	0.374	2			570.261	1707.76	1708.77	3	-9.9e-05	-0.05794	3493.43	441333	195847	280	294	TRUE
02_1	Uncategorized Sample	BioSample 1	02_1	g.16746 ORF g.16746 m.16746 type:5prime_partial len:1197 (+) comp255801_c0_seq2:2-3592(+)	m.16746,m.16747	atrina_contam.fasta	133740	1	30	40	65	0.00136	0.329	possibly correct	TRUE	02_1.22168.22168.2	EENTDWSEGLPK	K	E	0.997	2.44	0.612	2			702.817	1403.62	1404.63	2	-0.000816	-0.5809	4270.64	309991	289395	1036	1047	TRUE
02_1	Uncategorized Sample	BioSample 1	02_1	g.16746 ORF g.16746 m.16746 type:5prime_partial len:1197 (+) comp255801_c0_seq2:2-3592(+)	m.16746,m.16747	atrina_contam.fasta	133740	1	30	40	65	0.00136	0.329	possibly correct	TRUE	02_1.38148.38148.3	EFTPPPQSGVYENTPQQSLILEER	K	R	0.997	4.64	0.582	2			920.791	2759.35	2759.35	3	1.005	0.8232	6454.35	518141	1947790	891	914	TRUE
02_1	Uncategorized Sample	BioSample 1	02_1	g.16746 ORF g.16746 m.16746 type:5prime_partial len:1197 (+) comp255801_c0_seq2:2-3592(+)	m.16746,m.16747	atrina_contam.fasta	133740	1	30	40	65	0.00136	0.329	possibly correct	TRUE	02_1.5139.5139.2	EIQSGSPTATTPR	K	K	0.997	2.96	0.435	2			672.841	1343.67	1344.68	2	-0.00035	-0.2603	2015.24	1497090	2688720	808	820	TRUE
02_1	Uncategorized Sample	BioSample 1	02_1	g.16746 ORF g.16746 m.16746 type:5prime_partial len:1197 (+) comp255801_c0_seq2:2-3592(+)	m.16746,m.16747	atrina_contam.fasta	133740	1	30	40	65	0.00136	0.329	possibly correct	TRUE	02_1.4325.4325.2	EIQTGGQSPTSPR	R	Q	0.997	3.03	0.462	2			679.339	1356.66	1357.67	2	0.00025	0.1841	1908.61	3210260	4550790	875	887	TRUE
02_1	Uncategorized Sample	BioSample 1	02_1	g.16746 ORF g.16746 m.16746 type:5prime_partial len:1197 (+) comp255801_c0_seq2:2-3592(+)	m.16746,m.16747	atrina_contam.fasta	133740	1	30	40	65	0.00136	0.329	possibly correct	TRUE	02_1.28021.28021.2	EQDQSVGDVEFPETGYAK	R	N	0.997	3.97	0.66	2			999.95	1997.89	1998.89	2	0.000682	0.3412	5058.35	831138	998867	934	951	TRUE
02_1	Uncategorized Sample	BioSample 1	02_1	g.16746 ORF g.16746 m.16746 type:5prime_partial len:1197 (+) comp255801_c0_seq2:2-3592(+)	m.16746,m.16747	atrina_contam.fasta	133740	1	30	40	65	0.00136	0.329	possibly correct	TRUE	02_1.27860.27860.2	EQDQSVGDVEFPETGYAK	R	N	0.997	4.53	0.641	2			999.951	1997.89	1998.89	2	0.001108	0.5543	5036.23	4662990	7356690	934	951	TRUE
02_1	Uncategorized Sample	BioSample 1	02_1	g.16746 ORF g.16746 m.16746 type:5prime_partial len:1197 (+) comp255801_c0_seq2:2-3592(+)	m.16746,m.16747	atrina_contam.fasta	133740	1	30	40	65	0.00136	0.329	possibly correct	TRUE	02_1.18185.18185.2	ESDRHIAEELPEIGTAK	R	N	0.997	3.28	0.423	2			947.98	1893.95	1894.95	2	0.002674	1.411	3746.33	502717	782172	533	549	TRUE
02_1	Uncategorized Sample	BioSample 1	02_1	g.16746 ORF g.16746 m.16746 type:5prime_partial len:1197 (+) comp255801_c0_seq2:2-3592(+)	m.16746,m.16747	atrina_contam.fasta	133740	1	30	40	65	0.00136	0.329	possibly correct	TRUE	02_1.18261.18261.4	ESDRHIAEELPEIGTAK	R	N	0.997	2.37	0.489	2			474.493	1893.94	1894.95	4	0.000371	0.1958	3756.26	5366340	204693	533	549	TRUE
02_1	Uncategorized Sample	BioSample 1	02_1	g.16746 ORF g.16746 m.16746 type:5prime_partial len:1197 (+) comp255801_c0_seq2:2-3592(+)	m.16746,m.16747	atrina_contam.fasta	133740	1	30	40	65	0.00136	0.329	possibly correct	TRUE	02_1.18104.18104.4	ESDRHIAEELPEIGTAK	R	N	0.997	3.68	0.486	2			474.493	1893.94	1894.95	4	0.000837	0.4417	3735.54	974866	946756	533	549	TRUE
02_1	Uncategorized Sample	BioSample 1	02_1	g.16746 ORF g.16746 m.16746 type:5prime_partial len:1197 (+) comp255801_c0_seq2:2-3592(+)	m.16746,m.16747	atrina_contam.fasta	133740	1	30	40	65	0.00136	0.329	possibly correct	TRUE	02_1.18091.18091.3	ESDRHIAEELPEIGTAK	R	N	0.997	4.25	0.486	2			632.323	1893.95	1894.95	3	0.002326	1.227	3733.81	289914	364023	533	549	TRUE
02_1	Uncategorized Sample	BioSample 1	02_1	g.16746 ORF g.16746 m.16746 type:5prime_partial len:1197 (+) comp255801_c0_seq2:2-3592(+)	m.16746,m.16747	atrina_contam.fasta	133740	1	30	40	65	0.00136	0.329	possibly correct	TRUE	02_1.18260.18260.3	ESDRHIAEELPEIGTAK	R	N	0.997	5.37	0.594	2			632.322	1893.94	1894.95	3	0.00067	0.3536	3756.19	2331120	3264810	533	549	TRUE
02_1	Uncategorized Sample	BioSample 1	02_1	g.16746 ORF g.16746 m.16746 type:5prime_partial len:1197 (+) comp255801_c0_seq2:2-3592(+)	m.16746,m.16747	atrina_contam.fasta	133740	1	30	40	65	0.00136	0.329	possibly correct	TRUE	02_1.33015.33015.4	EVTPPREDMFAGVLENKPTESPDVVK	K	S	0.993	2.47	0.483	2			722.116	2884.44	2884.44	4	1.004	0.4839	5739.25	437353	158858	824	849	TRUE
02_1	Uncategorized Sample	BioSample 1	02_1	g.16746 ORF g.16746 m.16746 type:5prime_partial len:1197 (+) comp255801_c0_seq2:2-3592(+)	m.16746,m.16747	atrina_contam.fasta	133740	1	30	40	65	0.00136	0.329	possibly correct	TRUE	02_1.39896.39896.4	FESGDSSAAATVRPSVQDEIMSVEGGVYENEPVHDPDVAR	K	E	0.997	6.43	0.713	2			1062.49	4245.94	4246.95	4	0.002608	0.6141	6703.8	879119	1567620	493	532	TRUE
02_1	Uncategorized Sample	BioSample 1	02_1	g.16746 ORF g.16746 m.16746 type:5prime_partial len:1197 (+) comp255801_c0_seq2:2-3592(+)	m.16746,m.16747	atrina_contam.fasta	133740	1	30	40	65	0.00136	0.329	possibly correct	TRUE	02_1.7696.7696.3	FKEIQSGSPTATTPR	K	K	0.99	2.71	0.364	2			540.619	1618.83	1619.84	3	0.003255	2.009	2355.56	587396	866060	806	820	TRUE
02_1	Uncategorized Sample	BioSample 1	02_1	g.16746 ORF g.16746 m.16746 type:5prime_partial len:1197 (+) comp255801_c0_seq2:2-3592(+)	m.16746,m.16747	atrina_contam.fasta	133740	1	30	40	65	0.00136	0.329	possibly correct	TRUE	02_1.7857.7857.3	FKEIQSGSPTATTPR	K	K	0.994	2.71	0.372	2			540.618	1618.83	1619.84	3	0.000417	0.2574	2376.78	3594390	2024790	806	820	TRUE
02_1	Uncategorized Sample	BioSample 1	02_1	g.16746 ORF g.16746 m.16746 type:5prime_partial len:1197 (+) comp255801_c0_seq2:2-3592(+)	m.16746,m.16747	atrina_contam.fasta	133740	1	30	40	65	0.00136	0.329	possibly correct	TRUE	02_1.7727.7727.2	FKEIQSGSPTATTPR	K	K	0.997	3.34	0.342	2			810.423	1618.83	1619.84	2	0.000252	0.1556	2359.62	595073	1928890	806	820	TRUE
02_1	Uncategorized Sample	BioSample 1	02_1	g.16746 ORF g.16746 m.16746 type:5prime_partial len:1197 (+) comp255801_c0_seq2:2-3592(+)	m.16746,m.16747	atrina_contam.fasta	133740	1	30	40	65	0.00136	0.329	possibly correct	TRUE	02_1.7460.7460.3	FREIQTGGQSPTSPR	K	Q	0.997	4.91	0.548	2			554.285	1659.83	1660.84	3	0.000664	0.3998	2324.32	3209940	1648690	873	887	TRUE
02_1	Uncategorized Sample	BioSample 1	02_1	g.16746 ORF g.16746 m.16746 type:5prime_partial len:1197 (+) comp255801_c0_seq2:2-3592(+)	m.16746,m.16747	atrina_contam.fasta	133740	1	30	40	65	0.00136	0.329	possibly correct	TRUE	02_1.7300.7300.3	FREIQTGGQSPTSPR	K	Q	0.997	4.94	0.57	2			554.285	1659.83	1660.84	3	0.001001	0.6027	2303.01	2051020	1693050	873	887	TRUE
02_1	Uncategorized Sample	BioSample 1	02_1	g.16746 ORF g.16746 m.16746 type:5prime_partial len:1197 (+) comp255801_c0_seq2:2-3592(+)	m.16746,m.16747	atrina_contam.fasta	133740	1	30	40	65	0.00136	0.329	possibly correct	TRUE	02_1.5811.5811.2	FTKGEYVSEPR	R	A	0.997	2.61	0.486	2			656.831	1311.65	1312.65	2	0.001278	0.9736	2103.41	477673	1001980	664	674	TRUE
02_1	Uncategorized Sample	BioSample 1	02_1	g.16746 ORF g.16746 m.16746 type:5prime_partial len:1197 (+) comp255801_c0_seq2:2-3592(+)	m.16746,m.16747	atrina_contam.fasta	133740	1	30	40	65	0.00136	0.329	possibly correct	TRUE	02_1.4632.4632.2	GEYVSEPR	K	A	0.987	1.83	0.462	2			468.725	935.435	936.442	2	0.000458	0.4891	1948.64	10417500	14206200	584	591	TRUE
02_1	Uncategorized Sample	BioSample 1	02_1	g.16746 ORF g.16746 m.16746 type:5prime_partial len:1197 (+) comp255801_c0_seq2:2-3592(+)	m.16746,m.16747	atrina_contam.fasta	133740	1	30	40	65	0.00136	0.329	possibly correct	TRUE	02_1.2829.2829.2	GKGEYVSEPR	R	A	0.997	2.68	0.4	2			561.283	1120.55	1121.56	2	-0.000169	-0.1507	1711.38	489483	1079280	582	591	TRUE
02_1	Uncategorized Sample	BioSample 1	02_1	g.16746 ORF g.16746 m.16746 type:5prime_partial len:1197 (+) comp255801_c0_seq2:2-3592(+)	m.16746,m.16747	atrina_contam.fasta	133740	1	30	40	65	0.00136	0.329	possibly correct	TRUE	02_1.19246.19246.3	HIAEELPEIGTAK	R	N	0.975	2.54	0.31	2			469.921	1406.74	1407.75	3	0.001601	1.137	3887.26	580500	141341	537	549	TRUE
02_1	Uncategorized Sample	BioSample 1	02_1	g.16746 ORF g.16746 m.16746 type:5prime_partial len:1197 (+) comp255801_c0_seq2:2-3592(+)	m.16746,m.16747	atrina_contam.fasta	133740	1	30	40	65	0.00136	0.329	possibly correct	TRUE	02_1.19065.19065.3	HIAEELPEIGTAK	R	N	0.997	2.82	0.397	2			469.921	1406.74	1407.75	3	0.000685	0.4866	3863.39	1423280	370594	537	549	TRUE
02_1	Uncategorized Sample	BioSample 1	02_1	g.16746 ORF g.16746 m.16746 type:5prime_partial len:1197 (+) comp255801_c0_seq2:2-3592(+)	m.16746,m.16747	atrina_contam.fasta	133740	1	30	40	65	0.00136	0.329	possibly correct	TRUE	02_1.18905.18905.3	HIAEELPEIGTAK	R	N	0.997	2.68	0.43	2			469.921	1406.74	1407.75	3	8.3e-05	0.05896	3842.06	2104960	781869	537	549	TRUE
02_1	Uncategorized Sample	BioSample 1	02_1	g.16746 ORF g.16746 m.16746 type:5prime_partial len:1197 (+) comp255801_c0_seq2:2-3592(+)	m.16746,m.16747	atrina_contam.fasta	133740	1	30	40	65	0.00136	0.329	possibly correct	TRUE	02_1.19144.19144.2	HIAEELPEIGTAK	R	N	0.997	3.37	0.474	2			704.379	1406.74	1407.75	2	0.00202	1.435	3873.78	433660	764356	537	549	TRUE
02_1	Uncategorized Sample	BioSample 1	02_1	g.16746 ORF g.16746 m.16746 type:5prime_partial len:1197 (+) comp255801_c0_seq2:2-3592(+)	m.16746,m.16747	atrina_contam.fasta	133740	1	30	40	65	0.00136	0.329	possibly correct	TRUE	02_1.18849.18849.2	HIAEELPEIGTAK	R	N	0.997	3.67	0.479	2			704.377	1406.74	1407.75	2	-0.001122	-0.797	3834.78	457777	616768	537	549	TRUE
02_1	Uncategorized Sample	BioSample 1	02_1	g.16746 ORF g.16746 m.16746 type:5prime_partial len:1197 (+) comp255801_c0_seq2:2-3592(+)	m.16746,m.16747	atrina_contam.fasta	133740	1	30	40	65	0.00136	0.329	possibly correct	TRUE	02_1.21285.21285.3	IEGGIYENQPQEEEGVVK	K	S	0.977	2.94	0.391	2			673.33	2016.97	2017.97	3	0.004528	2.244	4154.02	1030110	1072130	601	618	TRUE
02_1	Uncategorized Sample	BioSample 1	02_1	g.16746 ORF g.16746 m.16746 type:5prime_partial len:1197 (+) comp255801_c0_seq2:2-3592(+)	m.16746,m.16747	atrina_contam.fasta	133740	1	30	40	65	0.00136	0.329	possibly correct	TRUE	02_1.21157.21157.2	IEGGIYENQPQEEEGVVK	K	S	0.997	4.74	0.546	2			1009.49	2016.96	2017.97	2	-0.002681	-1.329	4137.77	432663	1023650	601	618	TRUE
02_1	Uncategorized Sample	BioSample 1	02_1	g.16746 ORF g.16746 m.16746 type:5prime_partial len:1197 (+) comp255801_c0_seq2:2-3592(+)	m.16746,m.16747	atrina_contam.fasta	133740	1	30	40	65	0.00136	0.329	possibly correct	TRUE	02_1.21503.21503.2	IEGGIYENQPQEEEGVVK	K	S	0.997	3.87	0.615	2			1009.49	2016.96	2017.97	2	0.000378	0.1873	4182.51	419599	391176	601	618	TRUE
02_1	Uncategorized Sample	BioSample 1	02_1	g.16746 ORF g.16746 m.16746 type:5prime_partial len:1197 (+) comp255801_c0_seq2:2-3592(+)	m.16746,m.16747	atrina_contam.fasta	133740	1	30	40	65	0.00136	0.329	possibly correct	TRUE	02_1.21329.21329.2	IEGGIYENQPQEEEGVVK	K	S	0.997	5.18	0.55	2			1009.49	2016.96	2017.97	2	0.000609	0.3018	4159.93	6632300	7738640	601	618	TRUE
02_1	Uncategorized Sample	BioSample 1	02_1	g.16746 ORF g.16746 m.16746 type:5prime_partial len:1197 (+) comp255801_c0_seq2:2-3592(+)	m.16746,m.16747	atrina_contam.fasta	133740	1	30	40	65	0.00136	0.329	possibly correct	TRUE	02_1.4326.4326.2	KGNYDEGFGR	R	Q	0.997	2.85	0.583	2			571.766	1141.52	1142.52	2	0.001289	1.128	1908.74	1168430	1424240	1164	1173	TRUE
02_1	Uncategorized Sample	BioSample 1	02_1	g.16746 ORF g.16746 m.16746 type:5prime_partial len:1197 (+) comp255801_c0_seq2:2-3592(+)	m.16746,m.16747	atrina_contam.fasta	133740	1	30	40	65	0.00136	0.329	possibly correct	TRUE	02_1.7493.7493.3	RPESGILESNPTR	R	R	0.997	2.86	0.341	2			485.923	1454.75	1455.76	3	0.000446	0.3064	2328.61	619454	912953	915	927	TRUE
02_1	Uncategorized Sample	BioSample 1	02_1	g.16746 ORF g.16746 m.16746 type:5prime_partial len:1197 (+) comp255801_c0_seq2:2-3592(+)	m.16746,m.16747	atrina_contam.fasta	133740	1	30	40	65	0.00136	0.329	possibly correct	TRUE	02_1.7542.7542.2	RPESGILESNPTR	R	R	0.997	3.14	0.557	2			728.382	1454.75	1455.76	2	0.000799	0.5489	2335.27	762081	1865230	915	927	TRUE
02_1	Uncategorized Sample	BioSample 1	02_1	g.16746 ORF g.16746 m.16746 type:5prime_partial len:1197 (+) comp255801_c0_seq2:2-3592(+)	m.16746,m.16747	atrina_contam.fasta	133740	1	30	40	65	0.00136	0.329	possibly correct	TRUE	02_1.7648.7648.3	RPESGILESNPTR	R	R	0.997	3.95	0.552	2			485.923	1454.75	1455.76	3	0.000593	0.4073	2349.21	6922150	5897180	915	927	TRUE
02_1	Uncategorized Sample	BioSample 1	02_1	g.16746 ORF g.16746 m.16746 type:5prime_partial len:1197 (+) comp255801_c0_seq2:2-3592(+)	m.16746,m.16747	atrina_contam.fasta	133740	1	30	40	65	0.00136	0.329	possibly correct	TRUE	02_1.5283.5283.4	RPESGILESNPTRR	R	D	0.981	1.93	0.371	2			403.719	1610.85	1611.86	4	-0.000664	-0.4119	2033.79	1414910	1568790	915	928	TRUE
02_1	Uncategorized Sample	BioSample 1	02_1	g.16746 ORF g.16746 m.16746 type:5prime_partial len:1197 (+) comp255801_c0_seq2:2-3592(+)	m.16746,m.16747	atrina_contam.fasta	133740	1	30	40	65	0.00136	0.329	possibly correct	TRUE	02_1.5201.5201.3	RPESGILESNPTRR	R	D	0.997	3.09	0.367	2			537.957	1610.85	1611.86	3	0.00038	0.2358	2023.38	4748190	8192780	915	928	TRUE
02_1	Uncategorized Sample	BioSample 1	02_1	g.16746 ORF g.16746 m.16746 type:5prime_partial len:1197 (+) comp255801_c0_seq2:2-3592(+)	m.16746,m.16747	atrina_contam.fasta	133740	1	30	40	65	0.00136	0.329	possibly correct	TRUE	02_1.28460.28460.2	SAFVAIQLEK	K	C	0.996	2.56	0.421	2			553.317	1104.62	1105.63	2	0.000878	0.7941	5119.46	771332	681000	1095	1104	TRUE
02_1	Uncategorized Sample	BioSample 1	02_1	g.16746 ORF g.16746 m.16746 type:5prime_partial len:1197 (+) comp255801_c0_seq2:2-3592(+)	m.16746,m.16747	atrina_contam.fasta	133740	1	30	40	65	0.00136	0.329	possibly correct	TRUE	02_1.23366.23366.2	SGEIVEESLPEQGYTK	R	N	0.997	4.48	0.575	2			883.428	1764.84	1765.85	2	0.000458	0.2594	4429.93	4125840	5472720	785	800	TRUE
02_1	Uncategorized Sample	BioSample 1	02_1	g.16746 ORF g.16746 m.16746 type:5prime_partial len:1197 (+) comp255801_c0_seq2:2-3592(+)	m.16746,m.16747	atrina_contam.fasta	133740	1	30	40	65	0.00136	0.329	possibly correct	TRUE	02_1.23215.23215.2	SGEIVEESLPEQGYTK	R	N	0.997	4.17	0.625	2			883.429	1764.84	1765.85	2	0.001478	0.837	4409.36	640421	1900090	785	800	TRUE
02_1	Uncategorized Sample	BioSample 1	02_1	g.16746 ORF g.16746 m.16746 type:5prime_partial len:1197 (+) comp255801_c0_seq2:2-3592(+)	m.16746,m.16747	atrina_contam.fasta	133740	1	30	40	65	0.00136	0.329	possibly correct	TRUE	02_1.4530.4530.2	SGQQTEEVmPER	K	G	0.988	2.12	0.438	2		m9: Oxidation (+15.99)	703.814	1405.61	1406.62	2	-0.000437	-0.3107	1935.52	318038	240748	702	713	TRUE
02_1	Uncategorized Sample	BioSample 1	02_1	g.16746 ORF g.16746 m.16746 type:5prime_partial len:1197 (+) comp255801_c0_seq2:2-3592(+)	m.16746,m.16747	atrina_contam.fasta	133740	1	30	40	65	0.00136	0.329	possibly correct	TRUE	02_1.4033.4033.2	SGQQTEEVmPER	K	G	0.993	2.56	0.479	2		m9: Oxidation (+15.99)	704.317	1406.62	1406.62	2	1.006	2.156	1870.59	769399	724506	702	713	TRUE
02_1	Uncategorized Sample	BioSample 1	02_1	g.16746 ORF g.16746 m.16746 type:5prime_partial len:1197 (+) comp255801_c0_seq2:2-3592(+)	m.16746,m.16747	atrina_contam.fasta	133740	1	30	40	65	0.00136	0.329	possibly correct	TRUE	02_1.3477.3477.2	SGQQTEEVmPER	K	G	0.997	2.69	0.51	2		m9: Oxidation (+15.99)	703.814	1405.61	1406.62	2	-0.000633	-0.45	1797.3	386659	1038460	702	713	TRUE
02_1	Uncategorized Sample	BioSample 1	02_1	g.16746 ORF g.16746 m.16746 type:5prime_partial len:1197 (+) comp255801_c0_seq2:2-3592(+)	m.16746,m.16747	atrina_contam.fasta	133740	1	30	40	65	0.00136	0.329	possibly correct	TRUE	02_1.4352.4352.2	SGQQTEEVmPER	K	G	0.997	2.89	0.47	2		m9: Oxidation (+15.99)	703.815	1405.61	1406.62	2	-2.401e-05	-0.01707	1912.18	696069	686795	702	713	TRUE
02_1	Uncategorized Sample	BioSample 1	02_1	g.16746 ORF g.16746 m.16746 type:5prime_partial len:1197 (+) comp255801_c0_seq2:2-3592(+)	m.16746,m.16747	atrina_contam.fasta	133740	1	30	40	65	0.00136	0.329	possibly correct	TRUE	02_1.7379.7379.2	SGQQTEEVMPER	K	G	0.997	3.09	0.485	2			695.817	1389.62	1390.63	2	-0.000845	-0.6076	2313.84	1788580	2274010	702	713	TRUE
02_1	Uncategorized Sample	BioSample 1	02_1	g.16746 ORF g.16746 m.16746 type:5prime_partial len:1197 (+) comp255801_c0_seq2:2-3592(+)	m.16746,m.16747	atrina_contam.fasta	133740	1	30	40	65	0.00136	0.329	possibly correct	TRUE	02_1.4192.4192.2	SGQQTEEVmPER	K	G	0.997	3.08	0.522	2		m9: Oxidation (+15.99)	703.814	1405.61	1406.62	2	-0.000797	-0.5666	1891.15	861309	815298	702	713	TRUE
02_1	Uncategorized Sample	BioSample 1	02_1	g.16746 ORF g.16746 m.16746 type:5prime_partial len:1197 (+) comp255801_c0_seq2:2-3592(+)	m.16746,m.16747	atrina_contam.fasta	133740	1	30	40	65	0.00136	0.329	possibly correct	TRUE	02_1.3637.3637.2	SGQQTEEVmPER	K	G	0.997	2.81	0.568	2		m9: Oxidation (+15.99)	703.813	1405.61	1406.62	2	-0.00335	-2.382	1818.52	355353	540082	702	713	TRUE
02_1	Uncategorized Sample	BioSample 1	02_1	g.16746 ORF g.16746 m.16746 type:5prime_partial len:1197 (+) comp255801_c0_seq2:2-3592(+)	m.16746,m.16747	atrina_contam.fasta	133740	1	30	40	65	0.00136	0.329	possibly correct	TRUE	02_1.7540.7540.2	SGQQTEEVMPER	K	G	0.997	3.23	0.544	2			695.817	1389.62	1390.63	2	-9.6e-05	-0.06903	2335.01	1118560	1515590	702	713	TRUE
02_1	Uncategorized Sample	BioSample 1	02_1	g.16746 ORF g.16746 m.16746 type:5prime_partial len:1197 (+) comp255801_c0_seq2:2-3592(+)	m.16746,m.16747	atrina_contam.fasta	133740	1	30	40	65	0.00136	0.329	possibly correct	TRUE	02_1.27355.27355.3	STLEQYEGQPEAGIFESKPSDR	R	D	0.997	4.48	0.521	2			823.39	2467.15	2468.16	3	-0.002999	-1.215	4967.72	563129	891155	758	779	TRUE
02_1	Uncategorized Sample	BioSample 1	02_1	g.16746 ORF g.16746 m.16746 type:5prime_partial len:1197 (+) comp255801_c0_seq2:2-3592(+)	m.16746,m.16747	atrina_contam.fasta	133740	1	30	40	65	0.00136	0.329	possibly correct	TRUE	02_1.27196.27196.3	STLEQYEGQPEAGIFESKPSDR	R	D	0.997	4.76	0.62	2			823.724	2468.15	2468.16	3	0.999	-1.51	4946.37	529776	968523	758	779	TRUE
02_1	Uncategorized Sample	BioSample 1	02_1	g.16746 ORF g.16746 m.16746 type:5prime_partial len:1197 (+) comp255801_c0_seq2:2-3592(+)	m.16746,m.16747	atrina_contam.fasta	133740	1	30	40	65	0.00136	0.329	possibly correct	TRUE	02_1.28379.28379.4	STLEQYEGQPEAGIFESKPSDRDNIVR	R	S	0.997	3.45	0.543	2			767.376	3065.48	3065.48	4	1.003	0.03142	5108.36	653114	601959	758	784	TRUE
02_1	Uncategorized Sample	BioSample 1	02_1	g.16746 ORF g.16746 m.16746 type:5prime_partial len:1197 (+) comp255801_c0_seq2:2-3592(+)	m.16746,m.16747	atrina_contam.fasta	133740	1	30	40	65	0.00136	0.329	possibly correct	TRUE	02_1.28212.28212.4	STLEQYEGQPEAGIFESKPSDRDNIVR	R	S	0.997	4.26	0.648	2			767.126	3064.48	3065.48	4	0.001557	0.5079	5085.31	7620820	16248300	758	784	TRUE
02_1	Uncategorized Sample	BioSample 1	02_1	g.16746 ORF g.16746 m.16746 type:5prime_partial len:1197 (+) comp255801_c0_seq2:2-3592(+)	m.16746,m.16747	atrina_contam.fasta	133740	1	30	40	65	0.00136	0.329	possibly correct	TRUE	02_1.21324.21324.3	SYDRGDVMAELPESGmAR	K	N	0.979	2.32	0.375	2		m16: Oxidation (+15.99)	667.634	1999.88	1999.88	3	1.003	0.02866	4159.16	650786	1223780	850	867	TRUE
02_1	Uncategorized Sample	BioSample 1	02_1	g.16746 ORF g.16746 m.16746 type:5prime_partial len:1197 (+) comp255801_c0_seq2:2-3592(+)	m.16746,m.16747	atrina_contam.fasta	133740	1	30	40	65	0.00136	0.329	possibly correct	TRUE	02_1.26216.26216.3	SYDRGDVMAELPESGMAR	K	N	0.997	3.69	0.593	2			661.969	1982.88	1983.89	3	0.001458	0.7349	4812.27	3506140	8466910	850	867	TRUE
02_1	Uncategorized Sample	BioSample 1	02_1	g.16746 ORF g.16746 m.16746 type:5prime_partial len:1197 (+) comp255801_c0_seq2:2-3592(+)	m.16746,m.16747	atrina_contam.fasta	133740	1	30	40	65	0.00136	0.329	possibly correct	TRUE	02_1.17527.17527.3	SYETIEDVRPEQGYAK	K	N	0.997	3.32	0.522	2			628.971	1883.89	1884.9	3	0.001398	0.7417	3660.03	1984150	4990740	619	634	TRUE
02_1	Uncategorized Sample	BioSample 1	02_1	g.16746 ORF g.16746 m.16746 type:5prime_partial len:1197 (+) comp255801_c0_seq2:2-3592(+)	m.16746,m.16747	atrina_contam.fasta	133740	1	30	40	65	0.00136	0.329	possibly correct	TRUE	02_1.17684.17684.3	SYETIEDVRPEQGYAK	K	N	0.997	4.14	0.552	2			628.971	1883.89	1884.9	3	0.001298	0.6886	3680.53	4109000	5998180	619	634	TRUE
02_1	Uncategorized Sample	BioSample 1	02_1	g.16746 ORF g.16746 m.16746 type:5prime_partial len:1197 (+) comp255801_c0_seq2:2-3592(+)	m.16746,m.16747	atrina_contam.fasta	133740	1	30	40	65	0.00136	0.329	possibly correct	TRUE	02_1.36669.36669.5	TKFESGDSSAAATVRPSVQDEIMSVEGGVYENEPVHDPDVAR	K	E	0.997	4.52	0.485	2			896.024	4475.08	4476.09	5	0.002332	0.521	6247.84	1056790	4224160	491	532	TRUE
02_1	Uncategorized Sample	BioSample 1	02_1	g.16746 ORF g.16746 m.16746 type:5prime_partial len:1197 (+) comp255801_c0_seq2:2-3592(+)	m.16746,m.16747	atrina_contam.fasta	133740	1	30	40	65	0.00136	0.329	possibly correct	TRUE	02_1.36511.36511.5	TKFESGDSSAAATVRPSVQDEIMSVEGGVYENEPVHDPDVAR	K	E	0.997	4.65	0.506	2			896.023	4475.08	4476.09	5	-0.003765	-0.8411	6225.89	2542640	7976200	491	532	TRUE
02_1	Uncategorized Sample	BioSample 1	02_1	g.16746 ORF g.16746 m.16746 type:5prime_partial len:1197 (+) comp255801_c0_seq2:2-3592(+)	m.16746,m.16747	atrina_contam.fasta	133740	1	30	40	65	0.00136	0.329	possibly correct	TRUE	02_1.30390.30390.4	TTSQPVVQNGDITNENTEKEEIRFDEMSSIK	K	T	0.993	3.24	0.399	2			885.924	3539.67	3539.68	4	0.994	-2.464	5380.22	313539	660123	460	490	TRUE
02_1	Uncategorized Sample	BioSample 1	02_1	g.16746 ORF g.16746 m.16746 type:5prime_partial len:1197 (+) comp255801_c0_seq2:2-3592(+)	m.16746,m.16747	atrina_contam.fasta	133740	1	30	40	65	0.00136	0.329	possibly correct	TRUE	02_1.6765.6765.2	VEPNIASAR	R	S	0.993	1.9	0.443	2			478.762	955.509	956.516	2	0.000484	0.506	2231.97	1854660	1586550	982	990	TRUE
02_1	Uncategorized Sample	BioSample 1	02_1	g.16746 ORF g.16746 m.16746 type:5prime_partial len:1197 (+) comp255801_c0_seq2:2-3592(+)	m.16746,m.16747	atrina_contam.fasta	133740	1	30	40	65	0.00136	0.329	possibly correct	TRUE	02_1.33105.33105.2	VESGIFESQPAEAEDIVK	K	S	0.997	3.39	0.487	2			974.481	1946.95	1947.95	2	-0.00101	-0.5185	5751.63	263889	768507	684	701	TRUE
02_1	Uncategorized Sample	BioSample 1	02_1	g.16746 ORF g.16746 m.16746 type:5prime_partial len:1197 (+) comp255801_c0_seq2:2-3592(+)	m.16746,m.16747	atrina_contam.fasta	133740	1	30	40	65	0.00136	0.329	possibly correct	TRUE	02_1.33261.33261.2	VESGIFESQPAEAEDIVK	K	S	0.997	4.96	0.635	2			974.481	1946.95	1947.95	2	0.000554	0.2844	5773.63	1502390	2519700	684	701	TRUE
02_1	Uncategorized Sample	BioSample 1	02_1	g.16746 ORF g.16746 m.16746 type:5prime_partial len:1197 (+) comp255801_c0_seq2:2-3592(+)	m.16746,m.16747	atrina_contam.fasta	133740	1	30	40	65	0.00136	0.329	possibly correct	TRUE	02_1.30472.30472.3	YENKVESGIFESQPAEAEDIVK	K	S	0.997	3.75	0.442	2			828.072	2481.19	2482.2	3	0.001638	0.6599	5392.04	265593	342917	680	701	TRUE
02_1	Uncategorized Sample	BioSample 1	02_1	g.16746 ORF g.16746 m.16746 type:5prime_partial len:1197 (+) comp255801_c0_seq2:2-3592(+)	m.16746,m.16747	atrina_contam.fasta	133740	1	30	40	65	0.00136	0.329	possibly correct	TRUE	02_1.30792.30792.3	YENKVESGIFESQPAEAEDIVK	K	S	0.997	4.29	0.424	2			828.072	2481.19	2482.2	3	0.003195	1.287	5435.54	669295	612323	680	701	TRUE
02_1	Uncategorized Sample	BioSample 1	02_1	g.16746 ORF g.16746 m.16746 type:5prime_partial len:1197 (+) comp255801_c0_seq2:2-3592(+)	m.16746,m.16747	atrina_contam.fasta	133740	1	30	40	65	0.00136	0.329	possibly correct	TRUE	02_1.30588.30588.2	YENKVESGIFESQPAEAEDIVK	K	S	0.997	5.25	0.742	2			1242.11	2482.2	2482.2	2	1.008	2.275	5407.87	508070	614947	680	701	TRUE
02_1	Uncategorized Sample	BioSample 1	02_1	g.16746 ORF g.16746 m.16746 type:5prime_partial len:1197 (+) comp255801_c0_seq2:2-3592(+)	m.16746,m.16747	atrina_contam.fasta	133740	1	30	40	65	0.00136	0.329	possibly correct	TRUE	02_1.30628.30628.3	YENKVESGIFESQPAEAEDIVK	K	S	0.997	5.48	0.562	2			828.071	2481.19	2482.2	3	0.000115	0.04633	5413.51	6190560	7824490	680	701	TRUE
02_1	Uncategorized Sample	BioSample 1	02_1	g.8694 ORF g.8694 m.8694 type:internal len:173 (+) comp249823_c1_seq1:2-523(+)	m.8694	atrina_contam.fasta	18279.8	1	2	2	2	4.18e-05	0.197	possibly correct	TRUE	02_1.42661.42661.2	AVTESINQLINIcTVSAPGQK	R	E	0.997	3.94	0.656	2	c13: Carbamidomethyl (+57.02)		1122.6	2243.18	2243.17	2	1.014	4.894	7104.14	129477	169975	63	83	TRUE
02_1	Uncategorized Sample	BioSample 1	02_1	g.8694 ORF g.8694 m.8694 type:internal len:173 (+) comp249823_c1_seq1:2-523(+)	m.8694	atrina_contam.fasta	18279.8	1	2	2	2	4.18e-05	0.197	possibly correct	TRUE	02_1.17830.17830.2	DADTQNQIVGGLK	K	S	0.997	3.7	0.539	2			679.848	1357.68	1358.69	2	-0.002493	-1.835	3699.44	601228	622055	16	28	TRUE
02_1	Uncategorized Sample	BioSample 1	02_1	SWISS-PROT:P04259 Tax_Id=9606 Gene_Symbol=KRT6B Keratin, type II cytoskeletal 6B	P04259,P48668	atrina_contam.fasta	60000.4	1	11	11	15	0.000313	0.34	possibly correct	TRUE	02_1.41580.41580.2	ADTLTDEINFLR	K	A	0.997	3.02	0.481	2			704.359	1406.7	1407.71	2	-0.001233	-0.8759	6944.77	320851	339845	288	299	TRUE
02_1	Uncategorized Sample	BioSample 1	02_1	SWISS-PROT:P04259 Tax_Id=9606 Gene_Symbol=KRT6B Keratin, type II cytoskeletal 6B	P04259,P48668	atrina_contam.fasta	60000.4	1	11	11	15	0.000313	0.34	possibly correct	TRUE	02_1.41729.41729.2	ADTLTDEINFLR	K	A	0.997	3.21	0.512	2			704.359	1406.7	1407.71	2	-0.000148	-0.1051	6966.18	603210	446198	288	299	TRUE
02_1	Uncategorized Sample	BioSample 1	02_1	SWISS-PROT:P04259 Tax_Id=9606 Gene_Symbol=KRT6B Keratin, type II cytoskeletal 6B	P04259,P48668	atrina_contam.fasta	60000.4	1	11	11	15	0.000313	0.34	possibly correct	TRUE	02_1.44978.44978.3	ALYDAELSQMQTHISDTSVVLSMDNNR	R	N	0.997	2.82	0.552	2			1013.48	3037.41	3038.42	3	-0.005372	-1.768	7447.52	86651	55912	300	326	TRUE
02_1	Uncategorized Sample	BioSample 1	02_1	SWISS-PROT:P04259 Tax_Id=9606 Gene_Symbol=KRT6B Keratin, type II cytoskeletal 6B	P04259,P48668	atrina_contam.fasta	60000.4	1	11	11	15	0.000313	0.34	possibly correct	FALSE	02_1.7618.7618.2	AQYEEIAQR	K	S	0.991	2.23	0.446	2			554.275	1106.54	1107.54	2	4.7e-05	0.04244	2345.26	7774530	6434650	339	347	FALSE	P35908
02_1	Uncategorized Sample	BioSample 1	02_1	SWISS-PROT:P04259 Tax_Id=9606 Gene_Symbol=KRT6B Keratin, type II cytoskeletal 6B	P04259,P48668	atrina_contam.fasta	60000.4	1	11	11	15	0.000313	0.34	possibly correct	TRUE	02_1.12248.12248.2	GSGGLGGAcGGAGFGSR	R	S	0.997	3.48	0.471	2	c9: Carbamidomethyl (+57.02)		712.821	1423.63	1424.63	2	0.0009007	0.6322	2959.7	262662	681804	43	59	TRUE
02_1	Uncategorized Sample	BioSample 1	02_1	SWISS-PROT:P04259 Tax_Id=9606 Gene_Symbol=KRT6B Keratin, type II cytoskeletal 6B	P04259,P48668	atrina_contam.fasta	60000.4	1	11	11	15	0.000313	0.34	possibly correct	TRUE	02_1.21350.21350.2	ISIGGGScAISGGYGSR	R	A	0.997	3.66	0.682	2	c8: Carbamidomethyl (+57.02)		799.883	1597.75	1598.76	2	-0.0004043	-0.2529	4162.66	477635	705892	70	86	TRUE
02_1	Uncategorized Sample	BioSample 1	02_1	SWISS-PROT:P04259 Tax_Id=9606 Gene_Symbol=KRT6B Keratin, type II cytoskeletal 6B	P04259,P48668	atrina_contam.fasta	60000.4	1	11	11	15	0.000313	0.34	possibly correct	FALSE	02_1.2292.2292.2	KYEDEINKR	N	T	0.987	2.82	0.313	1			597.809	1193.6	1194.61	2	-0.000716	-0.5994	1640.08	1903350	2180840	252	260	FALSE	P04264
02_1	Uncategorized Sample	BioSample 1	02_1	SWISS-PROT:P04259 Tax_Id=9606 Gene_Symbol=KRT6B Keratin, type II cytoskeletal 6B	P04259,P48668	atrina_contam.fasta	60000.4	1	11	11	15	0.000313	0.34	possibly correct	FALSE	02_1.36355.36355.2	LALDVEIATYR	K	K	0.976	1.77	0.506	2			632.352	1262.69	1263.69	2	0.002656	2.102	6204.18	127154	70253	456	466	FALSE	P35908
02_1	Uncategorized Sample	BioSample 1	02_1	SWISS-PROT:P04259 Tax_Id=9606 Gene_Symbol=KRT6B Keratin, type II cytoskeletal 6B	P04259,P48668	atrina_contam.fasta	60000.4	1	11	11	15	0.000313	0.34	possibly correct	FALSE	02_1.36191.36191.2	LALDVEIATYR	K	K	0.997	2.95	0.502	2			632.352	1262.69	1263.69	2	0.00309	2.445	6181.5	461669	341064	456	466	FALSE	P35908
02_1	Uncategorized Sample	BioSample 1	02_1	SWISS-PROT:P04259 Tax_Id=9606 Gene_Symbol=KRT6B Keratin, type II cytoskeletal 6B	P04259,P48668	atrina_contam.fasta	60000.4	1	11	11	15	0.000313	0.34	possibly correct	TRUE	02_1.2180.2180.3	LRSEIDHVKK	R	Q	0.995	3.2	0.296	2			408.907	1223.7	1224.71	3	-5.7e-05	-0.04654	1625.53	870342	849203	391	400	TRUE
02_1	Uncategorized Sample	BioSample 1	02_1	SWISS-PROT:P04259 Tax_Id=9606 Gene_Symbol=KRT6B Keratin, type II cytoskeletal 6B	P04259,P48668	atrina_contam.fasta	60000.4	1	11	11	15	0.000313	0.34	possibly correct	TRUE	02_1.19891.19891.2	NKLEGLEDALQK	K	A	0.997	3.43	0.326	2			679.371	1356.73	1357.73	2	0.001311	0.9656	3972.18	838755	1084310	425	436	TRUE
02_1	Uncategorized Sample	BioSample 1	02_1	SWISS-PROT:P04259 Tax_Id=9606 Gene_Symbol=KRT6B Keratin, type II cytoskeletal 6B	P04259,P48668	atrina_contam.fasta	60000.4	1	11	11	15	0.000313	0.34	possibly correct	FALSE	02_1.3058.3058.2	NKYEDEINKR	K	T	0.978	2.62	0.296	2			654.832	1307.65	1308.65	2	0.001625	1.242	1741.39	407288	1160030	251	260	FALSE	P04264
02_1	Uncategorized Sample	BioSample 1	02_1	SWISS-PROT:P04259 Tax_Id=9606 Gene_Symbol=KRT6B Keratin, type II cytoskeletal 6B	P04259,P48668	atrina_contam.fasta	60000.4	1	11	11	15	0.000313	0.34	possibly correct	FALSE	02_1.3038.3038.3	NKYEDEINKR	K	T	0.997	3.37	0.439	2			436.89	1307.65	1308.65	3	0.001798	1.374	1738.81	741907	1049180	251	260	FALSE	P04264
02_1	Uncategorized Sample	BioSample 1	02_1	SWISS-PROT:P04259 Tax_Id=9606 Gene_Symbol=KRT6B Keratin, type II cytoskeletal 6B	P04259,P48668	atrina_contam.fasta	60000.4	1	11	11	15	0.000313	0.34	possibly correct	FALSE	02_1.48176.48176.2	NLDLDSIIAEVK	R	A	0.997	3.23	0.459	2			665.367	1328.72	1329.73	2	-0.000519	-0.3903	7986.77	1174760	972986	327	338	FALSE	P35908
02_1	Uncategorized Sample	BioSample 1	02_1	SWISS-PROT:P04259 Tax_Id=9606 Gene_Symbol=KRT6B Keratin, type II cytoskeletal 6B	P04259,P48668	atrina_contam.fasta	60000.4	1	11	11	15	0.000313	0.34	possibly correct	FALSE	02_1.48039.48039.2	NLDLDSIIAEVK	R	A	0.997	3.47	0.48	2			665.366	1328.72	1329.73	2	-0.001313	-0.9874	7964.75	1779870	1153660	327	338	FALSE	P35908
02_1	Uncategorized Sample	BioSample 1	02_1	SWISS-PROT:P04259 Tax_Id=9606 Gene_Symbol=KRT6B Keratin, type II cytoskeletal 6B	P04259,P48668	atrina_contam.fasta	60000.4	1	11	11	15	0.000313	0.34	possibly correct	TRUE	02_1.5039.5039.3	NTKQEIAEINR	R	M	0.985	2.16	0.309	2			439.237	1314.69	1315.7	3	0.000801	0.6088	2002.15	968393	522979	376	386	TRUE
02_1	Uncategorized Sample	BioSample 1	02_1	SWISS-PROT:P04259 Tax_Id=9606 Gene_Symbol=KRT6B Keratin, type II cytoskeletal 6B	P04259,P48668	atrina_contam.fasta	60000.4	1	11	11	15	0.000313	0.34	possibly correct	TRUE	02_1.13938.13938.2	QLDSIVGER	R	G	0.991	1.96	0.451	2			508.772	1015.53	1016.54	2	0.000216	0.2125	3184.48	909021	1026730	224	232	TRUE
02_1	Uncategorized Sample	BioSample 1	02_1	SWISS-PROT:P04259 Tax_Id=9606 Gene_Symbol=KRT6B Keratin, type II cytoskeletal 6B	P04259,P48668	atrina_contam.fasta	60000.4	1	11	11	15	0.000313	0.34	possibly correct	TRUE	02_1.51771.51771.2	QNLEPLFEQYINNLR	R	R	0.98	2.38	0.43	2			946.491	1890.97	1890.97	2	1.004	0.6603	8642.64	86168.6	105244	208	222	TRUE
02_1	Uncategorized Sample	BioSample 1	02_1	SWISS-PROT:P04259 Tax_Id=9606 Gene_Symbol=KRT6B Keratin, type II cytoskeletal 6B	P04259,P48668	atrina_contam.fasta	60000.4	1	11	11	15	0.000313	0.34	possibly correct	TRUE	02_1.51785.51785.2	QNLEPLFEQYINNLR	R	R	0.993	2.8	0.499	2			945.989	1889.96	1890.97	2	-0.000985	-0.5209	8645.88	114450	105802	208	222	TRUE
02_1	Uncategorized Sample	BioSample 1	02_1	SWISS-PROT:P04259 Tax_Id=9606 Gene_Symbol=KRT6B Keratin, type II cytoskeletal 6B	P04259,P48668	atrina_contam.fasta	60000.4	1	11	11	15	0.000313	0.34	possibly correct	TRUE	02_1.51897.51897.2	QNLEPLFEQYINNLR	R	R	0.997	3.36	0.521	2			945.989	1889.96	1890.97	2	0.000769	0.4067	8666.64	320045	407083	208	222	TRUE
02_1	Uncategorized Sample	BioSample 1	02_1	SWISS-PROT:P04259 Tax_Id=9606 Gene_Symbol=KRT6B Keratin, type II cytoskeletal 6B	P04259,P48668	atrina_contam.fasta	60000.4	1	11	11	15	0.000313	0.34	possibly correct	TRUE	02_1.15425.15425.2	SGFSSISVSR	R	S	0.997	2.22	0.711	2			513.764	1025.51	1026.52	2	-3.7e-05	-0.03604	3380.72	748436	440242	31	40	TRUE
02_1	Uncategorized Sample	BioSample 1	02_1	SWISS-PROT:P04259 Tax_Id=9606 Gene_Symbol=KRT6B Keratin, type II cytoskeletal 6B	P04259,P48668	atrina_contam.fasta	60000.4	1	11	11	15	0.000313	0.34	possibly correct	TRUE	02_1.23737.23737.2	WTLLQEQGTK	K	T	0.995	2.54	0.331	2			602.322	1202.63	1203.64	2	5.1e-05	0.04237	4480.13	279945	395679	195	204	TRUE
02_1	Uncategorized Sample	BioSample 1	02_1	SWISS-PROT:P04259 Tax_Id=9606 Gene_Symbol=KRT6B Keratin, type II cytoskeletal 6B	P04259,P48668	atrina_contam.fasta	60000.4	1	11	11	15	0.000313	0.34	possibly correct	TRUE	02_1.23893.23893.2	WTLLQEQGTK	K	T	0.997	2.89	0.355	2			602.322	1202.63	1203.64	2	0.000566	0.4702	4500.83	1182750	967864	195	204	TRUE
02_1	Uncategorized Sample	BioSample 1	02_1	g.11142 ORF g.11142 m.11142 type:internal len:339 (+) comp251929_c0_seq1:3-1022(+)	m.11142	atrina_contam.fasta	38761.9	1	4	4	4	8.35e-05	0.189	possibly correct	TRUE	02_1.44529.44529.2	AFVDVYLIGYTEK	R	N	0.986	1.99	0.535	2			759.399	1516.78	1517.79	2	0.001477	0.9731	7373.58	81757.2	134859	30	42	TRUE
02_1	Uncategorized Sample	BioSample 1	02_1	g.11142 ORF g.11142 m.11142 type:internal len:339 (+) comp251929_c0_seq1:3-1022(+)	m.11142	atrina_contam.fasta	38761.9	1	4	4	4	8.35e-05	0.189	possibly correct	TRUE	02_1.26722.26722.3	GcTSYSPPATAIIYGQSHYR	R	L	0.997	2.84	0.461	2	c2: Carbamidomethyl (+57.02)		743.683	2228.03	2229.04	3	-0.003464	-1.554	4880.96	327038	681478	276	295	TRUE
02_1	Uncategorized Sample	BioSample 1	02_1	g.11142 ORF g.11142 m.11142 type:internal len:339 (+) comp251929_c0_seq1:3-1022(+)	m.11142	atrina_contam.fasta	38761.9	1	4	4	4	8.35e-05	0.189	possibly correct	TRUE	02_1.42052.42052.3	TADHPcITSDcTEFDIGLIEVR	K	F	0.997	3.59	0.704	2	c6: Carbamidomethyl (+57.02), c11: Carbamidomethyl (+57.02)		850.729	2549.16	2549.17	3	1.007	1.585	7014.35	137309	154509	69	90	TRUE
02_1	Uncategorized Sample	BioSample 1	02_1	g.11142 ORF g.11142 m.11142 type:internal len:339 (+) comp251929_c0_seq1:3-1022(+)	m.11142	atrina_contam.fasta	38761.9	1	4	4	4	8.35e-05	0.189	possibly correct	TRUE	02_1.12745.12745.2	YGADWPASK	K	C	0.983	1.55	0.603	2			497.735	993.455	994.463	2	-0.001022	-1.028	3025.9	602024	195449	122	130	TRUE
02_1	Uncategorized Sample	BioSample 1	02_1	g.17247 ORF g.17247 m.17247 type:internal len:320 (+) comp256175_c4_seq1:2-964(+)	m.17247	atrina_contam.fasta	35782.6	0.996	1	1	1	2.09e-05	0.0344	possibly correct	TRUE	02_1.28040.28040.2	VSVPLTQFSAR	R	K	0.989	2.03	0.537	2			602.838	1203.66	1204.67	2	-0.00054	-0.4483	5060.87	276732	286638	48	58	TRUE
02_1	Uncategorized Sample	BioSample 1	02_1	g.16693 ORF g.16693 m.16693 type:internal len:110 (+) comp255775_c2_seq1:3-335(+)	m.16693	atrina_contam.fasta	12563.2	1	3	3	5	0.000104	0.3	possibly correct	TRUE	02_1.27575.27575.2	IFISPSADLDR	K	E	0.995	2.61	0.369	2			617.328	1232.64	1233.65	2	0.000473	0.3834	4996.83	455117	623137	55	65	TRUE
02_1	Uncategorized Sample	BioSample 1	02_1	g.16693 ORF g.16693 m.16693 type:internal len:110 (+) comp255775_c2_seq1:3-335(+)	m.16693	atrina_contam.fasta	12563.2	1	3	3	5	0.000104	0.3	possibly correct	TRUE	02_1.21783.21783.3	IFISPSADLDRER	K	L	0.992	2.08	0.427	2			506.935	1517.78	1518.79	3	0.000575	0.3786	4219.8	222316	475367	55	67	TRUE
02_1	Uncategorized Sample	BioSample 1	02_1	g.16693 ORF g.16693 m.16693 type:internal len:110 (+) comp255775_c2_seq1:3-335(+)	m.16693	atrina_contam.fasta	12563.2	1	3	3	5	0.000104	0.3	possibly correct	TRUE	02_1.21953.21953.3	IFISPSADLDRER	K	L	0.997	3.15	0.387	2			506.935	1517.78	1518.79	3	0.000543	0.3575	4242.29	2159620	1963900	55	67	TRUE
02_1	Uncategorized Sample	BioSample 1	02_1	g.16693 ORF g.16693 m.16693 type:internal len:110 (+) comp255775_c2_seq1:3-335(+)	m.16693	atrina_contam.fasta	12563.2	1	3	3	5	0.000104	0.3	possibly correct	TRUE	02_1.51078.51078.2	LSSFDVQVFAYDSPLDPSVR	R	R	0.997	2.92	0.687	2			1122.06	2242.11	2242.1	2	1.011	3.678	8506.02	81224.2	59619	68	87	TRUE
02_1	Uncategorized Sample	BioSample 1	02_1	g.16693 ORF g.16693 m.16693 type:internal len:110 (+) comp255775_c2_seq1:3-335(+)	m.16693	atrina_contam.fasta	12563.2	1	3	3	5	0.000104	0.3	possibly correct	TRUE	02_1.51203.51203.2	LSSFDVQVFAYDSPLDPSVR	R	R	0.997	3.8	0.648	2			1121.56	2241.1	2242.1	2	0.003671	1.637	8526.91	187910	192404	68	87	TRUE
02_1	Uncategorized Sample	BioSample 1	02_1	g.17211 ORF g.17211 m.17211 type:complete len:418 (+) comp256164_c1_seq3:50-1303(+)	m.17211	atrina_contam.fasta	47646.2	1	2	2	2	4.18e-05	0.151	possibly correct	TRUE	02_1.54962.54962.3	DLDPSRPVTFVANSDYNTDLVAQYVDVLcINR	K	Y	0.997	3.05	0.563	2	c29: Carbamidomethyl (+57.02)		1224.27	3669.78	3669.79	3	1.001	-0.434	9362.39	75298.1	80147	234	265	TRUE
02_1	Uncategorized Sample	BioSample 1	02_1	g.17211 ORF g.17211 m.17211 type:complete len:418 (+) comp256164_c1_seq3:50-1303(+)	m.17211	atrina_contam.fasta	47646.2	1	2	2	2	4.18e-05	0.151	possibly correct	TRUE	02_1.47375.47375.3	TSHYPYAEEIMDQADQQGIVVIDESPGVGIR	R	K	0.988	2.03	0.541	2			1140.22	3417.63	3417.63	3	1.007	1.133	7843.63	65382.8	54452	145	175	TRUE
02_1	Uncategorized Sample	BioSample 1	02_1	g.16662 ORF g.16662 m.16662 type:5prime_partial len:385 (+) comp255763_c0_seq3:1-1155(+)	m.16662,m.16663,m.16666,m.16667	atrina_contam.fasta	43913.3	1	2	2	2	4.18e-05	0.0651	possibly correct	TRUE	02_1.51428.51428.2	STLVNSLFLTDLYPER	K	H	0.993	2.29	0.545	2			934.494	1866.97	1867.98	2	0.001386	0.742	8568.44	74406.9	51166	58	73	TRUE
02_1	Uncategorized Sample	BioSample 1	02_1	g.16662 ORF g.16662 m.16662 type:5prime_partial len:385 (+) comp255763_c0_seq3:1-1155(+)	m.16662,m.16663,m.16666,m.16667	atrina_contam.fasta	43913.3	1	2	2	2	4.18e-05	0.0651	possibly correct	TRUE	02_1.26056.26056.2	VNIVPVIAK	K	A	0.993	1.68	0.536	2			476.813	951.612	952.619	2	0.000272	0.2855	4790.87	607829	508516	182	190	TRUE
02_1	Uncategorized Sample	BioSample 1	02_1	g.16640 ORF g.16640 m.16640 type:3prime_partial len:706 (+) comp255751_c4_seq1:227-2347(+)	m.16640	atrina_contam.fasta	78471.1	1	10	10	13	0.000271	0.178	possibly correct	TRUE	02_1.39819.39819.3	AMLLcEVDGTPKPVVSWYK	K	E	0.997	3.65	0.624	2	c5: Carbamidomethyl (+57.02)		731.707	2192.1	2193.11	3	-0.001796	-0.8191	6692.85	217307	106027	143	161	TRUE
02_1	Uncategorized Sample	BioSample 1	02_1	g.16640 ORF g.16640 m.16640 type:3prime_partial len:706 (+) comp255751_c4_seq1:227-2347(+)	m.16640	atrina_contam.fasta	78471.1	1	10	10	13	0.000271	0.178	possibly correct	TRUE	02_1.45609.45609.2	DVNLIIEVAPSIK	K	G	0.997	2.61	0.576	2			705.913	1409.81	1410.82	2	-0.001406	-0.9966	7547.37	77614	67681	117	129	TRUE
02_1	Uncategorized Sample	BioSample 1	02_1	g.16640 ORF g.16640 m.16640 type:3prime_partial len:706 (+) comp255751_c4_seq1:227-2347(+)	m.16640	atrina_contam.fasta	78471.1	1	10	10	13	0.000271	0.178	possibly correct	TRUE	02_1.45739.45739.2	DVNLIIEVAPSIK	K	G	0.997	3.17	0.562	2			705.914	1409.81	1410.82	2	-0.000485	-0.3438	7568.03	170635	253706	117	129	TRUE
02_1	Uncategorized Sample	BioSample 1	02_1	g.16640 ORF g.16640 m.16640 type:3prime_partial len:706 (+) comp255751_c4_seq1:227-2347(+)	m.16640	atrina_contam.fasta	78471.1	1	10	10	13	0.000271	0.178	possibly correct	TRUE	02_1.42766.42766.2	EAELTcTIESPSEPIISWK	K	Y	0.997	3.84	0.682	2	c6: Carbamidomethyl (+57.02)		1096.04	2190.06	2190.06	2	1.003	0.3122	7119.55	314763	590249	231	249	TRUE
02_1	Uncategorized Sample	BioSample 1	02_1	g.16640 ORF g.16640 m.16640 type:3prime_partial len:706 (+) comp255751_c4_seq1:227-2347(+)	m.16640	atrina_contam.fasta	78471.1	1	10	10	13	0.000271	0.178	possibly correct	TRUE	02_1.38096.38096.2	GAVTLYPLGLPK	K	I	0.997	2.69	0.508	2			614.868	1227.72	1228.73	2	-0.000692	-0.5632	6447	458182	192190	304	315	TRUE
02_1	Uncategorized Sample	BioSample 1	02_1	g.16640 ORF g.16640 m.16640 type:3prime_partial len:706 (+) comp255751_c4_seq1:227-2347(+)	m.16640	atrina_contam.fasta	78471.1	1	10	10	13	0.000271	0.178	possibly correct	TRUE	02_1.37939.37939.2	GAVTLYPLGLPK	K	I	0.997	2.61	0.529	2			614.869	1227.72	1228.73	2	-0.000122	-0.09929	6424.79	289123	127255	304	315	TRUE
02_1	Uncategorized Sample	BioSample 1	02_1	g.16640 ORF g.16640 m.16640 type:3prime_partial len:706 (+) comp255751_c4_seq1:227-2347(+)	m.16640	atrina_contam.fasta	78471.1	1	10	10	13	0.000271	0.178	possibly correct	TRUE	02_1.47715.47715.2	IALFFEGGNVYTSALR	K	I	0.997	2.47	0.633	2			879.466	1756.92	1757.92	2	0.002012	1.145	7903.31	85574.5	118887	263	278	TRUE
02_1	Uncategorized Sample	BioSample 1	02_1	g.16640 ORF g.16640 m.16640 type:3prime_partial len:706 (+) comp255751_c4_seq1:227-2347(+)	m.16640	atrina_contam.fasta	78471.1	1	10	10	13	0.000271	0.178	possibly correct	TRUE	02_1.47822.47822.2	IALFFEGGNVYTSALR	K	I	0.997	3.5	0.701	2			879.466	1756.92	1757.92	2	0.002895	1.647	7923.55	192807	304542	263	278	TRUE
02_1	Uncategorized Sample	BioSample 1	02_1	g.16640 ORF g.16640 m.16640 type:3prime_partial len:706 (+) comp255751_c4_seq1:227-2347(+)	m.16640	atrina_contam.fasta	78471.1	1	10	10	13	0.000271	0.178	possibly correct	TRUE	02_1.16054.16054.2	SITVFEGDK	K	A	0.977	1.98	0.433	2			498.257	994.499	995.505	2	0.001266	1.272	3465.15	595609	431706	134	142	TRUE
02_1	Uncategorized Sample	BioSample 1	02_1	g.16640 ORF g.16640 m.16640 type:3prime_partial len:706 (+) comp255751_c4_seq1:227-2347(+)	m.16640	atrina_contam.fasta	78471.1	1	10	10	13	0.000271	0.178	possibly correct	TRUE	02_1.6532.6532.2	TSGITEIK	K	S	0.982	2.13	0.346	2			424.74	847.465	848.473	2	-0.000622	-0.7331	2201.57	387683	787226	677	684	TRUE
02_1	Uncategorized Sample	BioSample 1	02_1	g.16640 ORF g.16640 m.16640 type:3prime_partial len:706 (+) comp255751_c4_seq1:227-2347(+)	m.16640	atrina_contam.fasta	78471.1	1	10	10	13	0.000271	0.178	possibly correct	TRUE	02_1.39145.39145.2	TSGYPIPTVTWYK	R	N	0.997	2.49	0.582	2			756.891	1511.77	1512.77	2	0.000568	0.3755	6596	417269	788271	425	437	TRUE
02_1	Uncategorized Sample	BioSample 1	02_1	g.16640 ORF g.16640 m.16640 type:3prime_partial len:706 (+) comp255751_c4_seq1:227-2347(+)	m.16640	atrina_contam.fasta	78471.1	1	10	10	13	0.000271	0.178	possibly correct	TRUE	02_1.32561.32561.2	WLVLNNIQR	R	Q	0.997	2.5	0.384	2			578.336	1154.66	1155.66	2	0.000901	0.7796	5676.26	820843	633801	177	185	TRUE
02_1	Uncategorized Sample	BioSample 1	02_1	g.16640 ORF g.16640 m.16640 type:3prime_partial len:706 (+) comp255751_c4_seq1:227-2347(+)	m.16640	atrina_contam.fasta	78471.1	1	10	10	13	0.000271	0.178	possibly correct	TRUE	02_1.6365.6365.2	YIcVATNK	K	L	0.976	1.98	0.417	2	c3: Carbamidomethyl (+57.02)		484.748	967.481	968.487	2	0.0009127	0.9424	2177.48	1292000	1730640	191	198	TRUE
02_1	Uncategorized Sample	BioSample 1	02_1	g.16607 ORF g.16607 m.16607 type:complete len:1767 (+) comp255740_c0_seq2:320-5620(+)	m.16607	atrina_contam.fasta	172687	1	14	32	300	0.00627	0.117	possibly correct	TRUE	02_1.13711.13711.2	ATPFIEcNGR	R	G	0.986	1.79	0.373	2	c7: Carbamidomethyl (+57.02)		582.777	1163.54	1164.55	2	0.0002847	0.2445	3153.96	29678300	34871200	1706	1715	TRUE
02_1	Uncategorized Sample	BioSample 1	02_1	g.16607 ORF g.16607 m.16607 type:complete len:1767 (+) comp255740_c0_seq2:320-5620(+)	m.16607	atrina_contam.fasta	172687	1	14	32	300	0.00627	0.117	possibly correct	TRUE	02_1.50253.50253.2	FSFWLSTIDQNNQFSTPQQQTLK	K	A	0.986	2.59	0.554	2			1379.68	2757.34	2758.35	2	-0.003918	-1.42	8354.25	111769	88373	1726	1748	TRUE
02_1	Uncategorized Sample	BioSample 1	02_1	g.16607 ORF g.16607 m.16607 type:complete len:1767 (+) comp255740_c0_seq2:320-5620(+)	m.16607	atrina_contam.fasta	172687	1	14	32	300	0.00627	0.117	possibly correct	TRUE	02_1.50364.50364.2	FSFWLSTIDQNNQFSTPQQQTLK	K	A	0.997	5.69	0.571	2			1379.68	2757.34	2758.35	2	-0.000627	-0.2273	8374.68	1217960	2004430	1726	1748	TRUE
02_1	Uncategorized Sample	BioSample 1	02_1	g.16607 ORF g.16607 m.16607 type:complete len:1767 (+) comp255740_c0_seq2:320-5620(+)	m.16607	atrina_contam.fasta	172687	1	14	32	300	0.00627	0.117	possibly correct	TRUE	02_1.51368.51368.3	FSFWLSTIDQNNQFSTPQQQTLK	K	A	0.997	3.71	0.583	2			920.449	2758.32	2758.35	3	0.9846	-6.553	8556.26	617917	515094	1726	1748	TRUE
02_1	Uncategorized Sample	BioSample 1	02_1	g.16607 ORF g.16607 m.16607 type:complete len:1767 (+) comp255740_c0_seq2:320-5620(+)	m.16607	atrina_contam.fasta	172687	1	14	32	300	0.00627	0.117	possibly correct	TRUE	02_1.50424.50424.3	FSFWLSTIDQNNQFSTPQQQTLK	K	A	0.997	4.61	0.593	2			920.121	2757.34	2758.35	3	-1.1e-05	-0.003988	8385.28	1013250	1195620	1726	1748	TRUE
02_1	Uncategorized Sample	BioSample 1	02_1	g.16607 ORF g.16607 m.16607 type:complete len:1767 (+) comp255740_c0_seq2:320-5620(+)	m.16607	atrina_contam.fasta	172687	1	14	32	300	0.00627	0.117	possibly correct	TRUE	02_1.50308.50308.3	FSFWLSTIDQNNQFSTPQQQTLK	K	A	0.997	4.93	0.596	2			920.121	2757.34	2758.35	3	-3.2e-05	-0.0116	8364.41	5224330	7172950	1726	1748	TRUE
02_1	Uncategorized Sample	BioSample 1	02_1	g.16607 ORF g.16607 m.16607 type:complete len:1767 (+) comp255740_c0_seq2:320-5620(+)	m.16607	atrina_contam.fasta	172687	1	14	32	300	0.00627	0.117	possibly correct	TRUE	02_1.32036.32036.3	fSTmPFLFcNTNNVcNYASR	R	N	0.988	2.9	0.506	2	c9: Carbamidomethyl (+57.02), c15: Carbamidomethyl (+57.02)	n-term: Acetyl (+42.01), m4: Oxidation (+15.99)	834.034	2499.08	2501.07	3	-0.981	8.687	5603.77	812520	1602010	1595	1614	TRUE
02_1	Uncategorized Sample	BioSample 1	02_1	g.16607 ORF g.16607 m.16607 type:complete len:1767 (+) comp255740_c0_seq2:320-5620(+)	m.16607	atrina_contam.fasta	172687	1	14	32	300	0.00627	0.117	possibly correct	TRUE	02_1.49175.49175.2	FSTMPFLFcNTNNVcNYASR	R	N	0.989	2.51	0.585	2	c9: Carbamidomethyl (+57.02), c15: Carbamidomethyl (+57.02)		1222.53	2443.04	2443.06	2	0.9859	-6.896	8157.98	122936	220897	1595	1614	TRUE
02_1	Uncategorized Sample	BioSample 1	02_1	g.16607 ORF g.16607 m.16607 type:complete len:1767 (+) comp255740_c0_seq2:320-5620(+)	m.16607	atrina_contam.fasta	172687	1	14	32	300	0.00627	0.117	possibly correct	TRUE	02_1.46426.46426.3	FSTmPFLFcNTNNVcNYASR	R	N	0.992	2.85	0.555	2	c9: Carbamidomethyl (+57.02), c15: Carbamidomethyl (+57.02)	m4: Oxidation (+15.99)	820.689	2459.05	2459.06	3	0.9949	-3.2	7686.16	286869	89092	1595	1614	TRUE
02_1	Uncategorized Sample	BioSample 1	02_1	g.16607 ORF g.16607 m.16607 type:complete len:1767 (+) comp255740_c0_seq2:320-5620(+)	m.16607	atrina_contam.fasta	172687	1	14	32	300	0.00627	0.117	possibly correct	TRUE	02_1.46964.46964.3	FSTmPFLFcNTNNVcNYASR	R	N	0.992	2.57	0.565	2	c9: Carbamidomethyl (+57.02), c15: Carbamidomethyl (+57.02)	m4: Oxidation (+15.99)	820.69	2459.05	2459.06	3	0.9973	-2.225	7771.34	201022	79679	1595	1614	TRUE
02_1	Uncategorized Sample	BioSample 1	02_1	g.16607 ORF g.16607 m.16607 type:complete len:1767 (+) comp255740_c0_seq2:320-5620(+)	m.16607	atrina_contam.fasta	172687	1	14	32	300	0.00627	0.117	possibly correct	TRUE	02_1.47743.47743.3	FSTMPFLFcNTNNVcNYASR	R	N	0.994	1.98	0.531	2	c9: Carbamidomethyl (+57.02), c15: Carbamidomethyl (+57.02)		815.026	2442.06	2443.06	3	0.0008414	0.3444	7908.33	131385	85165	1595	1614	TRUE
02_1	Uncategorized Sample	BioSample 1	02_1	g.16607 ORF g.16607 m.16607 type:complete len:1767 (+) comp255740_c0_seq2:320-5620(+)	m.16607	atrina_contam.fasta	172687	1	14	32	300	0.00627	0.117	possibly correct	TRUE	02_1.47506.47506.3	FSTMPFLFcNTNNVcNYASR	R	N	0.994	2.62	0.452	2	c9: Carbamidomethyl (+57.02), c15: Carbamidomethyl (+57.02)		815.026	2442.06	2443.06	3	0.0005254	0.2151	7866.67	331688	175220	1595	1614	TRUE
02_1	Uncategorized Sample	BioSample 1	02_1	g.16607 ORF g.16607 m.16607 type:complete len:1767 (+) comp255740_c0_seq2:320-5620(+)	m.16607	atrina_contam.fasta	172687	1	14	32	300	0.00627	0.117	possibly correct	TRUE	02_1.45812.45812.3	FSTmPFLFcNTNNVcNYASR	R	N	0.996	3.07	0.468	2	c9: Carbamidomethyl (+57.02), c15: Carbamidomethyl (+57.02)	m4: Oxidation (+15.99)	820.687	2459.04	2459.06	3	0.9891	-5.544	7579.94	232628	340596	1595	1614	TRUE
02_1	Uncategorized Sample	BioSample 1	02_1	g.16607 ORF g.16607 m.16607 type:complete len:1767 (+) comp255740_c0_seq2:320-5620(+)	m.16607	atrina_contam.fasta	172687	1	14	32	300	0.00627	0.117	possibly correct	TRUE	02_1.43287.43287.3	FSTmPFLFcNTNNVcNYASR	R	N	0.997	2.45	0.504	2	c9: Carbamidomethyl (+57.02), c15: Carbamidomethyl (+57.02)	m4: Oxidation (+15.99)	820.358	2458.05	2459.06	3	0.0009374	0.3812	7196.57	445575	1011080	1595	1614	TRUE
02_1	Uncategorized Sample	BioSample 1	02_1	g.16607 ORF g.16607 m.16607 type:complete len:1767 (+) comp255740_c0_seq2:320-5620(+)	m.16607	atrina_contam.fasta	172687	1	14	32	300	0.00627	0.117	possibly correct	TRUE	02_1.48064.48064.2	FSTmPFLFcNTNNVcNYASR	R	N	0.997	2.3	0.613	2	c9: Carbamidomethyl (+57.02), c15: Carbamidomethyl (+57.02)	m4: Oxidation (+15.99)	1230.52	2459.04	2459.06	2	0.9848	-7.276	7968.94	108581	138844	1595	1614	TRUE
02_1	Uncategorized Sample	BioSample 1	02_1	g.16607 ORF g.16607 m.16607 type:complete len:1767 (+) comp255740_c0_seq2:320-5620(+)	m.16607	atrina_contam.fasta	172687	1	14	32	300	0.00627	0.117	possibly correct	TRUE	02_1.45014.45014.3	FSTmPFLFcNTNNVcNYASR	R	N	0.997	3.46	0.458	2	c9: Carbamidomethyl (+57.02), c15: Carbamidomethyl (+57.02)	m4: Oxidation (+15.99)	820.687	2459.04	2459.06	3	0.9874	-6.237	7452.88	568475	337803	1595	1614	TRUE
02_1	Uncategorized Sample	BioSample 1	02_1	g.16607 ORF g.16607 m.16607 type:complete len:1767 (+) comp255740_c0_seq2:320-5620(+)	m.16607	atrina_contam.fasta	172687	1	14	32	300	0.00627	0.117	possibly correct	TRUE	02_1.48451.48451.2	FSTMPFLFcNTNNVcNYASR	R	N	0.997	3.02	0.535	2	c9: Carbamidomethyl (+57.02), c15: Carbamidomethyl (+57.02)		1222.53	2443.04	2443.06	2	0.9824	-8.313	8028.13	517921	1016100	1595	1614	TRUE
02_1	Uncategorized Sample	BioSample 1	02_1	g.16607 ORF g.16607 m.16607 type:complete len:1767 (+) comp255740_c0_seq2:320-5620(+)	m.16607	atrina_contam.fasta	172687	1	14	32	300	0.00627	0.117	possibly correct	TRUE	02_1.45152.45152.3	FSTmPFLFcNTNNVcNYASR	R	N	0.997	3.2	0.525	2	c9: Carbamidomethyl (+57.02), c15: Carbamidomethyl (+57.02)	m4: Oxidation (+15.99)	820.688	2459.04	2459.06	3	0.9911	-4.744	7474.61	463374	369809	1595	1614	TRUE
02_1	Uncategorized Sample	BioSample 1	02_1	g.16607 ORF g.16607 m.16607 type:complete len:1767 (+) comp255740_c0_seq2:320-5620(+)	m.16607	atrina_contam.fasta	172687	1	14	32	300	0.00627	0.117	possibly correct	TRUE	02_1.46831.46831.3	FSTmPFLFcNTNNVcNYASR	R	N	0.997	3.07	0.571	2	c9: Carbamidomethyl (+57.02), c15: Carbamidomethyl (+57.02)	m4: Oxidation (+15.99)	820.689	2459.04	2459.06	3	0.9946	-3.322	7750.1	199186	199368	1595	1614	TRUE
02_1	Uncategorized Sample	BioSample 1	02_1	g.16607 ORF g.16607 m.16607 type:complete len:1767 (+) comp255740_c0_seq2:320-5620(+)	m.16607	atrina_contam.fasta	172687	1	14	32	300	0.00627	0.117	possibly correct	TRUE	02_1.47630.47630.3	FSTMPFLFcNTNNVcNYASR	R	N	0.997	3.23	0.599	2	c9: Carbamidomethyl (+57.02), c15: Carbamidomethyl (+57.02)		815.359	2443.05	2443.06	3	0.9995	-1.333	7887.7	158797	203329	1595	1614	TRUE
02_1	Uncategorized Sample	BioSample 1	02_1	g.16607 ORF g.16607 m.16607 type:complete len:1767 (+) comp255740_c0_seq2:320-5620(+)	m.16607	atrina_contam.fasta	172687	1	14	32	300	0.00627	0.117	possibly correct	TRUE	02_1.48313.48313.2	FSTMPFLFcNTNNVcNYASR	R	N	0.997	2.88	0.593	2	c9: Carbamidomethyl (+57.02), c15: Carbamidomethyl (+57.02)		1222.53	2443.04	2443.06	2	0.9845	-7.457	8007.96	372145	839548	1595	1614	TRUE
02_1	Uncategorized Sample	BioSample 1	02_1	g.16607 ORF g.16607 m.16607 type:complete len:1767 (+) comp255740_c0_seq2:320-5620(+)	m.16607	atrina_contam.fasta	172687	1	14	32	300	0.00627	0.117	possibly correct	TRUE	02_1.45683.45683.3	FSTmPFLFcNTNNVcNYASR	R	N	0.997	3.22	0.493	2	c9: Carbamidomethyl (+57.02), c15: Carbamidomethyl (+57.02)	m4: Oxidation (+15.99)	820.687	2459.04	2459.06	3	0.9888	-5.676	7558.99	217444	317885	1595	1614	TRUE
02_1	Uncategorized Sample	BioSample 1	02_1	g.16607 ORF g.16607 m.16607 type:complete len:1767 (+) comp255740_c0_seq2:320-5620(+)	m.16607	atrina_contam.fasta	172687	1	14	32	300	0.00627	0.117	possibly correct	TRUE	02_1.40809.40809.3	FSTmPFLFcNTNNVcNYASR	R	N	0.997	2.83	0.586	2	c9: Carbamidomethyl (+57.02), c15: Carbamidomethyl (+57.02)	m4: Oxidation (+15.99)	820.356	2458.05	2459.06	3	-0.003245	-1.319	6833.21	103460	169156	1595	1614	TRUE
02_1	Uncategorized Sample	BioSample 1	02_1	g.16607 ORF g.16607 m.16607 type:complete len:1767 (+) comp255740_c0_seq2:320-5620(+)	m.16607	atrina_contam.fasta	172687	1	14	32	300	0.00627	0.117	possibly correct	TRUE	02_1.47388.47388.3	FSTMPFLFcNTNNVcNYASR	R	N	0.997	3.56	0.517	2	c9: Carbamidomethyl (+57.02), c15: Carbamidomethyl (+57.02)		815.026	2442.06	2443.06	3	0.00151	0.6182	7845.88	6577500	5058860	1595	1614	TRUE
02_1	Uncategorized Sample	BioSample 1	02_1	g.16607 ORF g.16607 m.16607 type:complete len:1767 (+) comp255740_c0_seq2:320-5620(+)	m.16607	atrina_contam.fasta	172687	1	14	32	300	0.00627	0.117	possibly correct	TRUE	02_1.48929.48929.2	FSTMPFLFcNTNNVcNYASR	R	N	0.997	3.2	0.517	2	c9: Carbamidomethyl (+57.02), c15: Carbamidomethyl (+57.02)		1222.53	2443.04	2443.06	2	0.9826	-8.241	8113.52	1268440	3079820	1595	1614	TRUE
02_1	Uncategorized Sample	BioSample 1	02_1	g.16607 ORF g.16607 m.16607 type:complete len:1767 (+) comp255740_c0_seq2:320-5620(+)	m.16607	atrina_contam.fasta	172687	1	14	32	300	0.00627	0.117	possibly correct	TRUE	02_1.42239.42239.2	FSTmPFLFcNTNNVcNYASR	R	N	0.997	3.42	0.542	2	c9: Carbamidomethyl (+57.02), c15: Carbamidomethyl (+57.02)	m4: Oxidation (+15.99)	1230.52	2459.04	2459.06	2	0.9851	-7.159	7043.02	376383	913186	1595	1614	TRUE
02_1	Uncategorized Sample	BioSample 1	02_1	g.16607 ORF g.16607 m.16607 type:complete len:1767 (+) comp255740_c0_seq2:320-5620(+)	m.16607	atrina_contam.fasta	172687	1	14	32	300	0.00627	0.117	possibly correct	TRUE	02_1.47735.47735.2	FSTmPFLFcNTNNVcNYASR	R	N	0.997	2.33	0.709	2	c9: Carbamidomethyl (+57.02), c15: Carbamidomethyl (+57.02)	m4: Oxidation (+15.99)	1230.53	2459.04	2459.06	2	0.9857	-6.909	7906.79	72037.9	65621	1595	1614	TRUE
02_1	Uncategorized Sample	BioSample 1	02_1	g.16607 ORF g.16607 m.16607 type:complete len:1767 (+) comp255740_c0_seq2:320-5620(+)	m.16607	atrina_contam.fasta	172687	1	14	32	300	0.00627	0.117	possibly correct	TRUE	02_1.49983.49983.2	FSTMPFLFcNTNNVcNYASR	R	N	0.997	3.08	0.622	2	c9: Carbamidomethyl (+57.02), c15: Carbamidomethyl (+57.02)		1222.53	2443.04	2443.06	2	0.9835	-7.856	8308.02	143059	303287	1595	1614	TRUE
02_1	Uncategorized Sample	BioSample 1	02_1	g.16607 ORF g.16607 m.16607 type:complete len:1767 (+) comp255740_c0_seq2:320-5620(+)	m.16607	atrina_contam.fasta	172687	1	14	32	300	0.00627	0.117	possibly correct	TRUE	02_1.47273.47273.2	FSTMPFLFcNTNNVcNYASR	R	N	0.997	4.45	0.501	2	c9: Carbamidomethyl (+57.02), c15: Carbamidomethyl (+57.02)		1222.04	2442.06	2443.06	2	0.001517	0.6211	7826.8	330133	808982	1595	1614	TRUE
02_1	Uncategorized Sample	BioSample 1	02_1	g.16607 ORF g.16607 m.16607 type:complete len:1767 (+) comp255740_c0_seq2:320-5620(+)	m.16607	atrina_contam.fasta	172687	1	14	32	300	0.00627	0.117	possibly correct	TRUE	02_1.45551.45551.3	FSTmPFLFcNTNNVcNYASR	R	N	0.997	3.69	0.466	2	c9: Carbamidomethyl (+57.02), c15: Carbamidomethyl (+57.02)	m4: Oxidation (+15.99)	820.688	2459.04	2459.06	3	0.9906	-4.942	7538.63	277112	481167	1595	1614	TRUE
02_1	Uncategorized Sample	BioSample 1	02_1	g.16607 ORF g.16607 m.16607 type:complete len:1767 (+) comp255740_c0_seq2:320-5620(+)	m.16607	atrina_contam.fasta	172687	1	14	32	300	0.00627	0.117	possibly correct	TRUE	02_1.45784.45784.2	FSTmPFLFcNTNNVcNYASR	R	N	0.997	4.05	0.582	2	c9: Carbamidomethyl (+57.02), c15: Carbamidomethyl (+57.02)	m4: Oxidation (+15.99)	1230.52	2459.04	2459.06	2	0.9848	-7.28	7575.16	254682	475351	1595	1614	TRUE
02_1	Uncategorized Sample	BioSample 1	02_1	g.16607 ORF g.16607 m.16607 type:complete len:1767 (+) comp255740_c0_seq2:320-5620(+)	m.16607	atrina_contam.fasta	172687	1	14	32	300	0.00627	0.117	possibly correct	TRUE	02_1.45510.45510.2	FSTmPFLFcNTNNVcNYASR	R	N	0.997	4.21	0.59	2	c9: Carbamidomethyl (+57.02), c15: Carbamidomethyl (+57.02)	m4: Oxidation (+15.99)	1230.53	2459.04	2459.06	2	0.9889	-5.61	7532.33	466775	1008620	1595	1614	TRUE
02_1	Uncategorized Sample	BioSample 1	02_1	g.16607 ORF g.16607 m.16607 type:complete len:1767 (+) comp255740_c0_seq2:320-5620(+)	m.16607	atrina_contam.fasta	172687	1	14	32	300	0.00627	0.117	possibly correct	TRUE	02_1.47648.47648.2	FSTMPFLFcNTNNVcNYASR	R	N	0.997	3.83	0.638	2	c9: Carbamidomethyl (+57.02), c15: Carbamidomethyl (+57.02)		1222.53	2443.05	2443.06	2	0.9994	-1.343	7890.78	189792	321047	1595	1614	TRUE
02_1	Uncategorized Sample	BioSample 1	02_1	g.16607 ORF g.16607 m.16607 type:complete len:1767 (+) comp255740_c0_seq2:320-5620(+)	m.16607	atrina_contam.fasta	172687	1	14	32	300	0.00627	0.117	possibly correct	TRUE	02_1.45647.45647.2	FSTmPFLFcNTNNVcNYASR	R	N	0.997	4.4	0.594	2	c9: Carbamidomethyl (+57.02), c15: Carbamidomethyl (+57.02)	m4: Oxidation (+15.99)	1230.53	2459.04	2459.06	2	0.9856	-6.954	7553.39	339249	705770	1595	1614	TRUE
02_1	Uncategorized Sample	BioSample 1	02_1	g.16607 ORF g.16607 m.16607 type:complete len:1767 (+) comp255740_c0_seq2:320-5620(+)	m.16607	atrina_contam.fasta	172687	1	14	32	300	0.00627	0.117	possibly correct	TRUE	02_1.44990.44990.2	FSTmPFLFcNTNNVcNYASR	R	N	0.997	4.22	0.612	2	c9: Carbamidomethyl (+57.02), c15: Carbamidomethyl (+57.02)	m4: Oxidation (+15.99)	1230.53	2459.04	2459.06	2	0.9866	-6.547	7449.25	727783	1582990	1595	1614	TRUE
02_1	Uncategorized Sample	BioSample 1	02_1	g.16607 ORF g.16607 m.16607 type:complete len:1767 (+) comp255740_c0_seq2:320-5620(+)	m.16607	atrina_contam.fasta	172687	1	14	32	300	0.00627	0.117	possibly correct	TRUE	02_1.44636.44636.3	FSTmPFLFcNTNNVcNYASR	R	N	0.997	3.58	0.486	2	c9: Carbamidomethyl (+57.02), c15: Carbamidomethyl (+57.02)	m4: Oxidation (+15.99)	820.356	2458.05	2459.06	3	-0.004505	-1.832	7390.09	434656	599523	1595	1614	TRUE
02_1	Uncategorized Sample	BioSample 1	02_1	g.16607 ORF g.16607 m.16607 type:complete len:1767 (+) comp255740_c0_seq2:320-5620(+)	m.16607	atrina_contam.fasta	172687	1	14	32	300	0.00627	0.117	possibly correct	TRUE	02_1.45126.45126.2	FSTmPFLFcNTNNVcNYASR	R	N	0.997	4.39	0.609	2	c9: Carbamidomethyl (+57.02), c15: Carbamidomethyl (+57.02)	m4: Oxidation (+15.99)	1230.53	2459.04	2459.06	2	0.987	-6.388	7470.76	630826	1391580	1595	1614	TRUE
02_1	Uncategorized Sample	BioSample 1	02_1	g.16607 ORF g.16607 m.16607 type:complete len:1767 (+) comp255740_c0_seq2:320-5620(+)	m.16607	atrina_contam.fasta	172687	1	14	32	300	0.00627	0.117	possibly correct	TRUE	02_1.44858.44858.2	FSTmPFLFcNTNNVcNYASR	R	N	0.997	4.48	0.603	2	c9: Carbamidomethyl (+57.02), c15: Carbamidomethyl (+57.02)	m4: Oxidation (+15.99)	1230.52	2459.03	2459.06	2	0.9845	-7.393	7428.28	543727	1426390	1595	1614	TRUE
02_1	Uncategorized Sample	BioSample 1	02_1	g.16607 ORF g.16607 m.16607 type:complete len:1767 (+) comp255740_c0_seq2:320-5620(+)	m.16607	atrina_contam.fasta	172687	1	14	32	300	0.00627	0.117	possibly correct	TRUE	02_1.45257.45257.2	FSTmPFLFcNTNNVcNYASR	R	N	0.997	4.46	0.612	2	c9: Carbamidomethyl (+57.02), c15: Carbamidomethyl (+57.02)	m4: Oxidation (+15.99)	1230.53	2459.04	2459.06	2	0.9864	-6.656	7491.24	570839	1443990	1595	1614	TRUE
02_1	Uncategorized Sample	BioSample 1	02_1	g.16607 ORF g.16607 m.16607 type:complete len:1767 (+) comp255740_c0_seq2:320-5620(+)	m.16607	atrina_contam.fasta	172687	1	14	32	300	0.00627	0.117	possibly correct	TRUE	02_1.46801.46801.2	FSTmPFLFcNTNNVcNYASR	R	N	0.997	4.11	0.646	2	c9: Carbamidomethyl (+57.02), c15: Carbamidomethyl (+57.02)	m4: Oxidation (+15.99)	1230.53	2459.05	2459.06	2	0.9989	-1.543	7745.44	271201	371286	1595	1614	TRUE
02_1	Uncategorized Sample	BioSample 1	02_1	g.16607 ORF g.16607 m.16607 type:complete len:1767 (+) comp255740_c0_seq2:320-5620(+)	m.16607	atrina_contam.fasta	172687	1	14	32	300	0.00627	0.117	possibly correct	TRUE	02_1.47420.47420.2	FSTmPFLFcNTNNVcNYASR	R	N	0.997	3.68	0.699	2	c9: Carbamidomethyl (+57.02), c15: Carbamidomethyl (+57.02)	m4: Oxidation (+15.99)	1230.53	2459.04	2459.06	2	0.986	-6.798	7851.24	165488	187923	1595	1614	TRUE
02_1	Uncategorized Sample	BioSample 1	02_1	g.16607 ORF g.16607 m.16607 type:complete len:1767 (+) comp255740_c0_seq2:320-5620(+)	m.16607	atrina_contam.fasta	172687	1	14	32	300	0.00627	0.117	possibly correct	TRUE	02_1.47397.47397.2	FSTMPFLFcNTNNVcNYASR	R	N	0.997	5.03	0.561	2	c9: Carbamidomethyl (+57.02), c15: Carbamidomethyl (+57.02)		1222.03	2442.05	2443.06	2	-0.001083	-0.4431	7847.32	7115110	15215200	1595	1614	TRUE
02_1	Uncategorized Sample	BioSample 1	02_1	g.16607 ORF g.16607 m.16607 type:complete len:1767 (+) comp255740_c0_seq2:320-5620(+)	m.16607	atrina_contam.fasta	172687	1	14	32	300	0.00627	0.117	possibly correct	TRUE	02_1.47059.47059.2	FSTmPFLFcNTNNVcNYASR	R	N	0.997	3.68	0.711	2	c9: Carbamidomethyl (+57.02), c15: Carbamidomethyl (+57.02)	m4: Oxidation (+15.99)	1230.53	2459.04	2459.06	2	0.9941	-3.494	7788.57	184302	350173	1595	1614	TRUE
02_1	Uncategorized Sample	BioSample 1	02_1	g.16607 ORF g.16607 m.16607 type:complete len:1767 (+) comp255740_c0_seq2:320-5620(+)	m.16607	atrina_contam.fasta	172687	1	14	32	300	0.00627	0.117	possibly correct	TRUE	02_1.45427.45427.3	FSTmPFLFcNTNNVcNYASR	R	N	0.997	3.53	0.548	2	c9: Carbamidomethyl (+57.02), c15: Carbamidomethyl (+57.02)	m4: Oxidation (+15.99)	820.688	2459.04	2459.06	3	0.9916	-4.542	7517.82	492242	397279	1595	1614	TRUE
02_1	Uncategorized Sample	BioSample 1	02_1	g.16607 ORF g.16607 m.16607 type:complete len:1767 (+) comp255740_c0_seq2:320-5620(+)	m.16607	atrina_contam.fasta	172687	1	14	32	300	0.00627	0.117	possibly correct	TRUE	02_1.43274.43274.2	FSTmPFLFcNTNNVcNYASR	R	N	0.997	4.24	0.63	2	c9: Carbamidomethyl (+57.02), c15: Carbamidomethyl (+57.02)	m4: Oxidation (+15.99)	1230.03	2458.05	2459.06	2	-0.003868	-1.573	7194.73	224004	309271	1595	1614	TRUE
02_1	Uncategorized Sample	BioSample 1	02_1	g.16607 ORF g.16607 m.16607 type:complete len:1767 (+) comp255740_c0_seq2:320-5620(+)	m.16607	atrina_contam.fasta	172687	1	14	32	300	0.00627	0.117	possibly correct	TRUE	02_1.46388.46388.2	FSTmPFLFcNTNNVcNYASR	R	N	0.997	4.05	0.701	2	c9: Carbamidomethyl (+57.02), c15: Carbamidomethyl (+57.02)	m4: Oxidation (+15.99)	1230.53	2459.05	2459.06	2	0.9947	-3.25	7680.23	289877	534553	1595	1614	TRUE
02_1	Uncategorized Sample	BioSample 1	02_1	g.16607 ORF g.16607 m.16607 type:complete len:1767 (+) comp255740_c0_seq2:320-5620(+)	m.16607	atrina_contam.fasta	172687	1	14	32	300	0.00627	0.117	possibly correct	TRUE	02_1.47511.47511.2	FSTMPFLFcNTNNVcNYASR	R	N	0.997	4.16	0.663	2	c9: Carbamidomethyl (+57.02), c15: Carbamidomethyl (+57.02)		1222.04	2442.06	2443.06	2	0.00111	0.4545	7867.47	295404	651589	1595	1614	TRUE
02_1	Uncategorized Sample	BioSample 1	02_1	g.16607 ORF g.16607 m.16607 type:complete len:1767 (+) comp255740_c0_seq2:320-5620(+)	m.16607	atrina_contam.fasta	172687	1	14	32	300	0.00627	0.117	possibly correct	TRUE	02_1.43585.43585.3	FSTmPFLFcNTNNVcNYASR	R	N	0.997	4.29	0.514	2	c9: Carbamidomethyl (+57.02), c15: Carbamidomethyl (+57.02)	m4: Oxidation (+15.99)	820.358	2458.05	2459.06	3	0.001999	0.8131	7239.34	1688520	3217680	1595	1614	TRUE
02_1	Uncategorized Sample	BioSample 1	02_1	g.16607 ORF g.16607 m.16607 type:complete len:1767 (+) comp255740_c0_seq2:320-5620(+)	m.16607	atrina_contam.fasta	172687	1	14	32	300	0.00627	0.117	possibly correct	TRUE	02_1.44492.44492.3	FSTmPFLFcNTNNVcNYASR	R	N	0.997	4.04	0.535	2	c9: Carbamidomethyl (+57.02), c15: Carbamidomethyl (+57.02)	m4: Oxidation (+15.99)	820.357	2458.05	2459.06	3	0.0002854	0.1161	7367.96	477973	641072	1595	1614	TRUE
02_1	Uncategorized Sample	BioSample 1	02_1	g.16607 ORF g.16607 m.16607 type:complete len:1767 (+) comp255740_c0_seq2:320-5620(+)	m.16607	atrina_contam.fasta	172687	1	14	32	300	0.00627	0.117	possibly correct	TRUE	02_1.44200.44200.3	FSTmPFLFcNTNNVcNYASR	R	N	0.997	3.77	0.551	2	c9: Carbamidomethyl (+57.02), c15: Carbamidomethyl (+57.02)	m4: Oxidation (+15.99)	820.358	2458.05	2459.06	3	0.001199	0.4877	7326.52	1073240	892295	1595	1614	TRUE
02_1	Uncategorized Sample	BioSample 1	02_1	g.16607 ORF g.16607 m.16607 type:complete len:1767 (+) comp255740_c0_seq2:320-5620(+)	m.16607	atrina_contam.fasta	172687	1	14	32	300	0.00627	0.117	possibly correct	TRUE	02_1.46695.46695.3	FSTmPFLFcNTNNVcNYASR	R	N	0.997	3.28	0.608	2	c9: Carbamidomethyl (+57.02), c15: Carbamidomethyl (+57.02)	m4: Oxidation (+15.99)	820.69	2459.05	2459.06	3	0.9973	-2.225	7728.75	337796	437164	1595	1614	TRUE
02_1	Uncategorized Sample	BioSample 1	02_1	g.16607 ORF g.16607 m.16607 type:complete len:1767 (+) comp255740_c0_seq2:320-5620(+)	m.16607	atrina_contam.fasta	172687	1	14	32	300	0.00627	0.117	possibly correct	TRUE	02_1.44351.44351.3	FSTmPFLFcNTNNVcNYASR	R	N	0.997	4.41	0.534	2	c9: Carbamidomethyl (+57.02), c15: Carbamidomethyl (+57.02)	m4: Oxidation (+15.99)	820.357	2458.05	2459.06	3	-0.0001536	-0.06247	7347.68	950908	1275610	1595	1614	TRUE
02_1	Uncategorized Sample	BioSample 1	02_1	g.16607 ORF g.16607 m.16607 type:complete len:1767 (+) comp255740_c0_seq2:320-5620(+)	m.16607	atrina_contam.fasta	172687	1	14	32	300	0.00627	0.117	possibly correct	TRUE	02_1.43442.43442.3	FSTmPFLFcNTNNVcNYASR	R	N	0.997	4.33	0.546	2	c9: Carbamidomethyl (+57.02), c15: Carbamidomethyl (+57.02)	m4: Oxidation (+15.99)	820.358	2458.05	2459.06	3	0.001964	0.7988	7218.6	1707460	2029550	1595	1614	TRUE
02_1	Uncategorized Sample	BioSample 1	02_1	g.16607 ORF g.16607 m.16607 type:complete len:1767 (+) comp255740_c0_seq2:320-5620(+)	m.16607	atrina_contam.fasta	172687	1	14	32	300	0.00627	0.117	possibly correct	TRUE	02_1.40988.40988.2	FSTmPFLFcNTNNVcNYASR	R	N	0.997	5.2	0.66	2	c9: Carbamidomethyl (+57.02), c15: Carbamidomethyl (+57.02)	m4: Oxidation (+15.99)	1230.03	2458.05	2459.06	2	0.0002634	0.1071	6858.99	772721	1729670	1595	1614	TRUE
02_1	Uncategorized Sample	BioSample 1	02_1	g.16607 ORF g.16607 m.16607 type:complete len:1767 (+) comp255740_c0_seq2:320-5620(+)	m.16607	atrina_contam.fasta	172687	1	14	32	300	0.00627	0.117	possibly correct	TRUE	02_1.44614.44614.2	FSTmPFLFcNTNNVcNYASR	R	N	0.997	5.07	0.729	2	c9: Carbamidomethyl (+57.02), c15: Carbamidomethyl (+57.02)	m4: Oxidation (+15.99)	1230.53	2459.05	2459.06	2	0.9983	-1.787	7386.9	470845	804372	1595	1614	TRUE
02_1	Uncategorized Sample	BioSample 1	02_1	g.16607 ORF g.16607 m.16607 type:complete len:1767 (+) comp255740_c0_seq2:320-5620(+)	m.16607	atrina_contam.fasta	172687	1	14	32	300	0.00627	0.117	possibly correct	TRUE	02_1.43735.43735.3	FSTmPFLFcNTNNVcNYASR	R	N	0.997	4.16	0.57	2	c9: Carbamidomethyl (+57.02), c15: Carbamidomethyl (+57.02)	m4: Oxidation (+15.99)	820.358	2458.05	2459.06	3	0.001982	0.8062	7260.46	1115620	2083950	1595	1614	TRUE
02_1	Uncategorized Sample	BioSample 1	02_1	g.16607 ORF g.16607 m.16607 type:complete len:1767 (+) comp255740_c0_seq2:320-5620(+)	m.16607	atrina_contam.fasta	172687	1	14	32	300	0.00627	0.117	possibly correct	TRUE	02_1.44477.44477.2	FSTmPFLFcNTNNVcNYASR	R	N	0.997	5.19	0.724	2	c9: Carbamidomethyl (+57.02), c15: Carbamidomethyl (+57.02)	m4: Oxidation (+15.99)	1230.53	2459.05	2459.06	2	0.9981	-1.868	7365.53	514394	899781	1595	1614	TRUE
02_1	Uncategorized Sample	BioSample 1	02_1	g.16607 ORF g.16607 m.16607 type:complete len:1767 (+) comp255740_c0_seq2:320-5620(+)	m.16607	atrina_contam.fasta	172687	1	14	32	300	0.00627	0.117	possibly correct	TRUE	02_1.40834.40834.2	FSTmPFLFcNTNNVcNYASR	R	N	0.997	5.07	0.694	2	c9: Carbamidomethyl (+57.02), c15: Carbamidomethyl (+57.02)	m4: Oxidation (+15.99)	1230.03	2458.05	2459.06	2	0.0006884	0.2799	6836.94	688678	1401450	1595	1614	TRUE
02_1	Uncategorized Sample	BioSample 1	02_1	g.16607 ORF g.16607 m.16607 type:complete len:1767 (+) comp255740_c0_seq2:320-5620(+)	m.16607	atrina_contam.fasta	172687	1	14	32	300	0.00627	0.117	possibly correct	TRUE	02_1.43569.43569.2	FSTmPFLFcNTNNVcNYASR	R	N	0.997	5.27	0.687	2	c9: Carbamidomethyl (+57.02), c15: Carbamidomethyl (+57.02)	m4: Oxidation (+15.99)	1230.03	2458.05	2459.06	2	1.388e-06	0.0005646	7237.1	1606640	3703510	1595	1614	TRUE
02_1	Uncategorized Sample	BioSample 1	02_1	g.16607 ORF g.16607 m.16607 type:complete len:1767 (+) comp255740_c0_seq2:320-5620(+)	m.16607	atrina_contam.fasta	172687	1	14	32	300	0.00627	0.117	possibly correct	TRUE	02_1.44177.44177.2	FSTmPFLFcNTNNVcNYASR	R	N	0.997	5.24	0.698	2	c9: Carbamidomethyl (+57.02), c15: Carbamidomethyl (+57.02)	m4: Oxidation (+15.99)	1230.03	2458.05	2459.06	2	0.0006764	0.2751	7323.23	953514	1801420	1595	1614	TRUE
02_1	Uncategorized Sample	BioSample 1	02_1	g.16607 ORF g.16607 m.16607 type:complete len:1767 (+) comp255740_c0_seq2:320-5620(+)	m.16607	atrina_contam.fasta	172687	1	14	32	300	0.00627	0.117	possibly correct	TRUE	02_1.43878.43878.2	FSTmPFLFcNTNNVcNYASR	R	N	0.997	5.3	0.697	2	c9: Carbamidomethyl (+57.02), c15: Carbamidomethyl (+57.02)	m4: Oxidation (+15.99)	1230.03	2458.05	2459.06	2	0.001524	0.6199	7280.67	1207720	2887680	1595	1614	TRUE
02_1	Uncategorized Sample	BioSample 1	02_1	g.16607 ORF g.16607 m.16607 type:complete len:1767 (+) comp255740_c0_seq2:320-5620(+)	m.16607	atrina_contam.fasta	172687	1	14	32	300	0.00627	0.117	possibly correct	TRUE	02_1.40958.40958.3	FSTmPFLFcNTNNVcNYASR	R	N	0.997	4.36	0.576	2	c9: Carbamidomethyl (+57.02), c15: Carbamidomethyl (+57.02)	m4: Oxidation (+15.99)	820.357	2458.05	2459.06	3	-0.0004986	-0.2028	6854.58	1428800	3720270	1595	1614	TRUE
02_1	Uncategorized Sample	BioSample 1	02_1	g.16607 ORF g.16607 m.16607 type:complete len:1767 (+) comp255740_c0_seq2:320-5620(+)	m.16607	atrina_contam.fasta	172687	1	14	32	300	0.00627	0.117	possibly correct	TRUE	02_1.44034.44034.2	FSTmPFLFcNTNNVcNYASR	R	N	0.997	5.34	0.7	2	c9: Carbamidomethyl (+57.02), c15: Carbamidomethyl (+57.02)	m4: Oxidation (+15.99)	1230.03	2458.05	2459.06	2	-0.0007016	-0.2853	7302.76	1449510	2220920	1595	1614	TRUE
02_1	Uncategorized Sample	BioSample 1	02_1	g.16607 ORF g.16607 m.16607 type:complete len:1767 (+) comp255740_c0_seq2:320-5620(+)	m.16607	atrina_contam.fasta	172687	1	14	32	300	0.00627	0.117	possibly correct	TRUE	02_1.43720.43720.2	FSTmPFLFcNTNNVcNYASR	R	N	0.997	5.19	0.716	2	c9: Carbamidomethyl (+57.02), c15: Carbamidomethyl (+57.02)	m4: Oxidation (+15.99)	1230.03	2458.05	2459.06	2	0.002062	0.8387	7258.36	1148030	2829800	1595	1614	TRUE
02_1	Uncategorized Sample	BioSample 1	02_1	g.16607 ORF g.16607 m.16607 type:complete len:1767 (+) comp255740_c0_seq2:320-5620(+)	m.16607	atrina_contam.fasta	172687	1	14	32	300	0.00627	0.117	possibly correct	TRUE	02_1.44328.44328.2	FSTmPFLFcNTNNVcNYASR	R	N	0.997	5.37	0.71	2	c9: Carbamidomethyl (+57.02), c15: Carbamidomethyl (+57.02)	m4: Oxidation (+15.99)	1230.03	2458.05	2459.06	2	-0.0007066	-0.2874	7344.38	782881	1266870	1595	1614	TRUE
02_1	Uncategorized Sample	BioSample 1	02_1	g.16607 ORF g.16607 m.16607 type:complete len:1767 (+) comp255740_c0_seq2:320-5620(+)	m.16607	atrina_contam.fasta	172687	1	14	32	300	0.00627	0.117	possibly correct	TRUE	02_1.43891.43891.3	FSTmPFLFcNTNNVcNYASR	R	N	0.997	4.44	0.593	2	c9: Carbamidomethyl (+57.02), c15: Carbamidomethyl (+57.02)	m4: Oxidation (+15.99)	820.358	2458.05	2459.06	3	0.001917	0.7797	7282.52	1594040	2306020	1595	1614	TRUE
02_1	Uncategorized Sample	BioSample 1	02_1	g.16607 ORF g.16607 m.16607 type:complete len:1767 (+) comp255740_c0_seq2:320-5620(+)	m.16607	atrina_contam.fasta	172687	1	14	32	300	0.00627	0.117	possibly correct	TRUE	02_1.44050.44050.3	FSTmPFLFcNTNNVcNYASR	R	N	0.997	4.04	0.629	2	c9: Carbamidomethyl (+57.02), c15: Carbamidomethyl (+57.02)	m4: Oxidation (+15.99)	820.358	2458.05	2459.06	3	0.001039	0.4227	7304.99	1749630	1911050	1595	1614	TRUE
02_1	Uncategorized Sample	BioSample 1	02_1	g.16607 ORF g.16607 m.16607 type:complete len:1767 (+) comp255740_c0_seq2:320-5620(+)	m.16607	atrina_contam.fasta	172687	1	14	32	300	0.00627	0.117	possibly correct	TRUE	02_1.31984.31984.2	GFNGLPGADGLPGPR	R	G	0.987	2.38	0.47	2			712.868	1423.72	1424.73	2	-0.000524	-0.3678	5596.79	312654	421036	1510	1524	TRUE
02_1	Uncategorized Sample	BioSample 1	02_1	g.16607 ORF g.16607 m.16607 type:complete len:1767 (+) comp255740_c0_seq2:320-5620(+)	m.16607	atrina_contam.fasta	172687	1	14	32	300	0.00627	0.117	possibly correct	TRUE	02_1.32141.32141.2	GFNGLPGADGLPGPR	R	G	0.997	2.43	0.582	2			712.868	1423.72	1424.73	2	7.7e-05	0.05405	5618.18	295272	361575	1510	1524	TRUE
02_1	Uncategorized Sample	BioSample 1	02_1	g.16607 ORF g.16607 m.16607 type:complete len:1767 (+) comp255740_c0_seq2:320-5620(+)	m.16607	atrina_contam.fasta	172687	1	14	32	300	0.00627	0.117	possibly correct	TRUE	02_1.20120.20120.2	GFQGFVGQPGR	K	D	0.997	2.34	0.651	2			575.294	1148.57	1149.58	2	-2.5e-05	-0.02175	4002.05	4923850	3560890	510	520	TRUE
02_1	Uncategorized Sample	BioSample 1	02_1	g.16607 ORF g.16607 m.16607 type:complete len:1767 (+) comp255740_c0_seq2:320-5620(+)	m.16607	atrina_contam.fasta	172687	1	14	32	300	0.00627	0.117	possibly correct	TRUE	02_1.5670.5670.2	GGTcHFFANK	R	F	0.997	2.22	0.461	2	c4: Carbamidomethyl (+57.02)		569.759	1137.5	1138.51	2	0.0003077	0.2703	2084.98	34563100	43949500	1716	1725	TRUE
02_1	Uncategorized Sample	BioSample 1	02_1	g.16607 ORF g.16607 m.16607 type:complete len:1767 (+) comp255740_c0_seq2:320-5620(+)	m.16607	atrina_contam.fasta	172687	1	14	32	300	0.00627	0.117	possibly correct	TRUE	02_1.5505.5505.2	GGTcHFFANK	R	F	0.997	3.68	0.44	2	c4: Carbamidomethyl (+57.02)		569.759	1137.5	1138.51	2	8.87e-05	0.07791	2063.24	3978810	4736250	1716	1725	TRUE
02_1	Uncategorized Sample	BioSample 1	02_1	g.16607 ORF g.16607 m.16607 type:complete len:1767 (+) comp255740_c0_seq2:320-5620(+)	m.16607	atrina_contam.fasta	172687	1	14	32	300	0.00627	0.117	possibly correct	TRUE	02_1.22039.22039.2	GLAGLPGEVGR	R	D	0.984	1.64	0.495	2			513.291	1024.57	1025.57	2	0.000463	0.4515	4253.69	294983	245500	1124	1134	TRUE
02_1	Uncategorized Sample	BioSample 1	02_1	g.16607 ORF g.16607 m.16607 type:complete len:1767 (+) comp255740_c0_seq2:320-5620(+)	m.16607	atrina_contam.fasta	172687	1	14	32	300	0.00627	0.117	possibly correct	TRUE	02_1.21843.21843.2	GLAGLPGEVGR	R	D	0.99	2.48	0.401	2			513.291	1024.57	1025.57	2	0.000795	0.7752	4227.85	1004390	575752	1124	1134	TRUE
02_1	Uncategorized Sample	BioSample 1	02_1	g.16607 ORF g.16607 m.16607 type:complete len:1767 (+) comp255740_c0_seq2:320-5620(+)	m.16607	atrina_contam.fasta	172687	1	14	32	300	0.00627	0.117	possibly correct	TRUE	02_1.21665.21665.2	GLAGLPGEVGR	R	D	0.997	2.36	0.593	2			513.291	1024.57	1025.57	2	0.000492	0.4797	4203.79	36540000	24225800	1124	1134	TRUE
02_1	Uncategorized Sample	BioSample 1	02_1	g.16607 ORF g.16607 m.16607 type:complete len:1767 (+) comp255740_c0_seq2:320-5620(+)	m.16607	atrina_contam.fasta	172687	1	14	32	300	0.00627	0.117	possibly correct	TRUE	02_1.21509.21509.2	GLAGLPGEVGR	R	D	0.997	2.67	0.562	2			513.291	1024.57	1025.57	2	0.000514	0.5012	4183.32	1071830	1022420	1124	1134	TRUE
02_1	Uncategorized Sample	BioSample 1	02_1	g.16607 ORF g.16607 m.16607 type:complete len:1767 (+) comp255740_c0_seq2:320-5620(+)	m.16607	atrina_contam.fasta	172687	1	14	32	300	0.00627	0.117	possibly correct	TRUE	02_1.6687.6687.2	GNDGIPGESGPR	R	G	0.997	2.29	0.573	2			578.273	1154.53	1155.54	2	0.000151	0.1307	2221.97	400273	691995	775	786	TRUE
02_1	Uncategorized Sample	BioSample 1	02_1	g.16607 ORF g.16607 m.16607 type:complete len:1767 (+) comp255740_c0_seq2:320-5620(+)	m.16607	atrina_contam.fasta	172687	1	14	32	300	0.00627	0.117	possibly correct	TRUE	02_1.30998.30998.2	GPmLQIPENFR	R	V	0.981	2.7	0.316	2		m3: Oxidation (+15.99)	659.334	1316.65	1317.66	2	-0.000586	-0.4447	5463.15	418822	252232	1443	1453	TRUE
02_1	Uncategorized Sample	BioSample 1	02_1	g.16607 ORF g.16607 m.16607 type:complete len:1767 (+) comp255740_c0_seq2:320-5620(+)	m.16607	atrina_contam.fasta	172687	1	14	32	300	0.00627	0.117	possibly correct	TRUE	02_1.31364.31364.2	GPmLQIPENFR	R	V	0.997	3.13	0.407	2		m3: Oxidation (+15.99)	659.336	1316.66	1317.66	2	0.002488	1.888	5514.15	901274	560592	1443	1453	TRUE
02_1	Uncategorized Sample	BioSample 1	02_1	g.16607 ORF g.16607 m.16607 type:complete len:1767 (+) comp255740_c0_seq2:320-5620(+)	m.16607	atrina_contam.fasta	172687	1	14	32	300	0.00627	0.117	possibly correct	TRUE	02_1.35422.35422.2	GPMLQIPENFR	R	V	0.997	2.99	0.297	2			651.337	1300.66	1301.67	2	0.000335	0.2574	6074.12	1205240	1270830	1443	1453	TRUE
02_1	Uncategorized Sample	BioSample 1	02_1	g.16607 ORF g.16607 m.16607 type:complete len:1767 (+) comp255740_c0_seq2:320-5620(+)	m.16607	atrina_contam.fasta	172687	1	14	32	300	0.00627	0.117	possibly correct	TRUE	02_1.31547.31547.2	GPmLQIPENFR	R	V	0.997	2.84	0.334	2		m3: Oxidation (+15.99)	659.335	1316.66	1317.66	2	0.000163	0.1237	5538.27	339366	399010	1443	1453	TRUE
02_1	Uncategorized Sample	BioSample 1	02_1	g.16607 ORF g.16607 m.16607 type:complete len:1767 (+) comp255740_c0_seq2:320-5620(+)	m.16607	atrina_contam.fasta	172687	1	14	32	300	0.00627	0.117	possibly correct	TRUE	02_1.35280.35280.2	GPmLQIPENFR	R	V	0.997	3.06	0.373	2		m3: Oxidation (+15.99)	659.334	1316.65	1317.66	2	-0.000877	-0.6656	6054.4	503007	525794	1443	1453	TRUE
02_1	Uncategorized Sample	BioSample 1	02_1	g.16607 ORF g.16607 m.16607 type:complete len:1767 (+) comp255740_c0_seq2:320-5620(+)	m.16607	atrina_contam.fasta	172687	1	14	32	300	0.00627	0.117	possibly correct	TRUE	02_1.35103.35103.2	GPMLQIPENFR	R	V	0.997	3.05	0.315	2			651.337	1300.66	1301.67	2	-0.000392	-0.3012	6029.91	914415	1176220	1443	1453	TRUE
02_1	Uncategorized Sample	BioSample 1	02_1	g.16607 ORF g.16607 m.16607 type:complete len:1767 (+) comp255740_c0_seq2:320-5620(+)	m.16607	atrina_contam.fasta	172687	1	14	32	300	0.00627	0.117	possibly correct	TRUE	02_1.30518.30518.2	GPmLQIPENFR	R	V	0.997	3.06	0.352	2		m3: Oxidation (+15.99)	659.335	1316.66	1317.66	2	0.000328	0.2489	5398.32	1103950	1875520	1443	1453	TRUE
02_1	Uncategorized Sample	BioSample 1	02_1	g.16607 ORF g.16607 m.16607 type:complete len:1767 (+) comp255740_c0_seq2:320-5620(+)	m.16607	atrina_contam.fasta	172687	1	14	32	300	0.00627	0.117	possibly correct	TRUE	02_1.30836.30836.2	GPmLQIPENFR	R	V	0.997	3.04	0.349	2		m3: Oxidation (+15.99)	659.334	1316.65	1317.66	2	-0.001634	-1.24	5441.46	737291	715753	1443	1453	TRUE
02_1	Uncategorized Sample	BioSample 1	02_1	g.16607 ORF g.16607 m.16607 type:complete len:1767 (+) comp255740_c0_seq2:320-5620(+)	m.16607	atrina_contam.fasta	172687	1	14	32	300	0.00627	0.117	possibly correct	TRUE	02_1.32189.32189.2	GPmLQIPENFR	R	V	0.997	3.12	0.35	2		m3: Oxidation (+15.99)	659.335	1316.65	1317.66	2	3.899e-05	0.02959	5624.78	16840400	19181500	1443	1453	TRUE
02_1	Uncategorized Sample	BioSample 1	02_1	g.16607 ORF g.16607 m.16607 type:complete len:1767 (+) comp255740_c0_seq2:320-5620(+)	m.16607	atrina_contam.fasta	172687	1	14	32	300	0.00627	0.117	possibly correct	TRUE	02_1.32509.32509.2	GPmLQIPENFR	R	V	0.997	3.19	0.346	2		m3: Oxidation (+15.99)	659.335	1316.66	1317.66	2	0.000162	0.1229	5669.02	4320580	6194180	1443	1453	TRUE
02_1	Uncategorized Sample	BioSample 1	02_1	g.16607 ORF g.16607 m.16607 type:complete len:1767 (+) comp255740_c0_seq2:320-5620(+)	m.16607	atrina_contam.fasta	172687	1	14	32	300	0.00627	0.117	possibly correct	TRUE	02_1.31710.31710.2	GPmLQIPENFR	R	V	0.997	3.13	0.367	2		m3: Oxidation (+15.99)	659.335	1316.66	1317.66	2	0.000294	0.2231	5559.78	3194000	4267680	1443	1453	TRUE
02_1	Uncategorized Sample	BioSample 1	02_1	g.16607 ORF g.16607 m.16607 type:complete len:1767 (+) comp255740_c0_seq2:320-5620(+)	m.16607	atrina_contam.fasta	172687	1	14	32	300	0.00627	0.117	possibly correct	TRUE	02_1.35261.35261.2	GPMLQIPENFR	R	V	0.997	3.18	0.306	2			651.338	1300.66	1301.67	2	0.000542	0.4164	6051.86	47771300	65494900	1443	1453	TRUE
02_1	Uncategorized Sample	BioSample 1	02_1	g.16607 ORF g.16607 m.16607 type:complete len:1767 (+) comp255740_c0_seq2:320-5620(+)	m.16607	atrina_contam.fasta	172687	1	14	32	300	0.00627	0.117	possibly correct	TRUE	02_1.32670.32670.2	GPmLQIPENFR	R	V	0.997	3.06	0.385	2		m3: Oxidation (+15.99)	659.335	1316.65	1317.66	2	1.991e-06	0.001511	5691.51	2041550	1593090	1443	1453	TRUE
02_1	Uncategorized Sample	BioSample 1	02_1	g.16607 ORF g.16607 m.16607 type:complete len:1767 (+) comp255740_c0_seq2:320-5620(+)	m.16607	atrina_contam.fasta	172687	1	14	32	300	0.00627	0.117	possibly correct	TRUE	02_1.31206.31206.2	GPmLQIPENFR	R	V	0.997	3.16	0.386	2		m3: Oxidation (+15.99)	659.334	1316.65	1317.66	2	-0.00109	-0.8272	5492.32	432969	589056	1443	1453	TRUE
02_1	Uncategorized Sample	BioSample 1	02_1	g.16607 ORF g.16607 m.16607 type:complete len:1767 (+) comp255740_c0_seq2:320-5620(+)	m.16607	atrina_contam.fasta	172687	1	14	32	300	0.00627	0.117	possibly correct	TRUE	02_1.31869.31869.2	GPmLQIPENFR	R	V	0.997	3.19	0.387	2		m3: Oxidation (+15.99)	659.335	1316.66	1317.66	2	0.000178	0.1351	5581.31	22091600	25319100	1443	1453	TRUE
02_1	Uncategorized Sample	BioSample 1	02_1	g.16607 ORF g.16607 m.16607 type:complete len:1767 (+) comp255740_c0_seq2:320-5620(+)	m.16607	atrina_contam.fasta	172687	1	14	32	300	0.00627	0.117	possibly correct	TRUE	02_1.35582.35582.2	GPMLQIPENFR	R	V	0.997	3.3	0.411	2			651.337	1300.66	1301.67	2	-0.000364	-0.2796	6096.49	510870	427479	1443	1453	TRUE
02_1	Uncategorized Sample	BioSample 1	02_1	g.16607 ORF g.16607 m.16607 type:complete len:1767 (+) comp255740_c0_seq2:320-5620(+)	m.16607	atrina_contam.fasta	172687	1	14	32	300	0.00627	0.117	possibly correct	TRUE	02_1.32989.32989.2	GPmLQIPENFR	R	V	0.997	3.42	0.401	2		m3: Oxidation (+15.99)	659.335	1316.65	1317.66	2	-0.000418	-0.3172	5735.76	1640730	1971870	1443	1453	TRUE
02_1	Uncategorized Sample	BioSample 1	02_1	g.16607 ORF g.16607 m.16607 type:complete len:1767 (+) comp255740_c0_seq2:320-5620(+)	m.16607	atrina_contam.fasta	172687	1	14	32	300	0.00627	0.117	possibly correct	TRUE	02_1.33149.33149.2	GPmLQIPENFR	R	V	0.997	3.2	0.378	2		m3: Oxidation (+15.99)	659.335	1316.65	1317.66	2	-4.009e-06	-0.003042	5757.62	2277560	3210170	1443	1453	TRUE
02_1	Uncategorized Sample	BioSample 1	02_1	g.16607 ORF g.16607 m.16607 type:complete len:1767 (+) comp255740_c0_seq2:320-5620(+)	m.16607	atrina_contam.fasta	172687	1	14	32	300	0.00627	0.117	possibly correct	TRUE	02_1.32349.32349.2	GPmLQIPENFR	R	V	0.997	3.24	0.431	2		m3: Oxidation (+15.99)	659.335	1316.65	1317.66	2	-3.501e-05	-0.02657	5646.74	8924600	7811290	1443	1453	TRUE
02_1	Uncategorized Sample	BioSample 1	02_1	g.16607 ORF g.16607 m.16607 type:complete len:1767 (+) comp255740_c0_seq2:320-5620(+)	m.16607	atrina_contam.fasta	172687	1	14	32	300	0.00627	0.117	possibly correct	TRUE	02_1.33293.33293.2	GPmLQIPENFR	R	V	0.997	3.32	0.386	2		m3: Oxidation (+15.99)	659.335	1316.65	1317.66	2	-4.601e-05	-0.03492	5778.16	2082320	3706050	1443	1453	TRUE
02_1	Uncategorized Sample	BioSample 1	02_1	g.16607 ORF g.16607 m.16607 type:complete len:1767 (+) comp255740_c0_seq2:320-5620(+)	m.16607	atrina_contam.fasta	172687	1	14	32	300	0.00627	0.117	possibly correct	TRUE	02_1.34813.34813.2	GPmLQIPENFR	R	V	0.997	3.33	0.398	2		m3: Oxidation (+15.99)	659.335	1316.65	1317.66	2	-0.000138	-0.1047	5989.42	958836	1528240	1443	1453	TRUE
02_1	Uncategorized Sample	BioSample 1	02_1	g.16607 ORF g.16607 m.16607 type:complete len:1767 (+) comp255740_c0_seq2:320-5620(+)	m.16607	atrina_contam.fasta	172687	1	14	32	300	0.00627	0.117	possibly correct	TRUE	02_1.34958.34958.2	GPmLQIPENFR	R	V	0.997	3.18	0.44	2		m3: Oxidation (+15.99)	659.335	1316.66	1317.66	2	0.000157	0.1191	6009.87	729116	880463	1443	1453	TRUE
02_1	Uncategorized Sample	BioSample 1	02_1	g.16607 ORF g.16607 m.16607 type:complete len:1767 (+) comp255740_c0_seq2:320-5620(+)	m.16607	atrina_contam.fasta	172687	1	14	32	300	0.00627	0.117	possibly correct	TRUE	02_1.33453.33453.2	GPmLQIPENFR	R	V	0.997	3.44	0.428	2		m3: Oxidation (+15.99)	659.335	1316.65	1317.66	2	1.299e-05	0.009859	5800.36	835985	1369870	1443	1453	TRUE
02_1	Uncategorized Sample	BioSample 1	02_1	g.16607 ORF g.16607 m.16607 type:complete len:1767 (+) comp255740_c0_seq2:320-5620(+)	m.16607	atrina_contam.fasta	172687	1	14	32	300	0.00627	0.117	possibly correct	TRUE	02_1.34335.34335.2	GPmLQIPENFR	R	V	0.997	3.3	0.402	2		m3: Oxidation (+15.99)	659.335	1316.65	1317.66	2	-0.00033	-0.2505	5922.74	1000690	1698500	1443	1453	TRUE
02_1	Uncategorized Sample	BioSample 1	02_1	g.16607 ORF g.16607 m.16607 type:complete len:1767 (+) comp255740_c0_seq2:320-5620(+)	m.16607	atrina_contam.fasta	172687	1	14	32	300	0.00627	0.117	possibly correct	TRUE	02_1.33598.33598.2	GPmLQIPENFR	R	V	0.997	3.39	0.421	2		m3: Oxidation (+15.99)	659.335	1316.66	1317.66	2	0.000494	0.3749	5821.05	667998	983860	1443	1453	TRUE
02_1	Uncategorized Sample	BioSample 1	02_1	g.16607 ORF g.16607 m.16607 type:complete len:1767 (+) comp255740_c0_seq2:320-5620(+)	m.16607	atrina_contam.fasta	172687	1	14	32	300	0.00627	0.117	possibly correct	TRUE	02_1.32829.32829.2	GPmLQIPENFR	R	V	0.997	3.49	0.415	2		m3: Oxidation (+15.99)	659.335	1316.65	1317.66	2	-0.000186	-0.1412	5713.71	1388480	1804820	1443	1453	TRUE
02_1	Uncategorized Sample	BioSample 1	02_1	g.16607 ORF g.16607 m.16607 type:complete len:1767 (+) comp255740_c0_seq2:320-5620(+)	m.16607	atrina_contam.fasta	172687	1	14	32	300	0.00627	0.117	possibly correct	TRUE	02_1.34495.34495.2	GPmLQIPENFR	R	V	0.997	3.31	0.438	2		m3: Oxidation (+15.99)	659.334	1316.65	1317.66	2	-0.000619	-0.4698	5944.89	917591	1185200	1443	1453	TRUE
02_1	Uncategorized Sample	BioSample 1	02_1	g.16607 ORF g.16607 m.16607 type:complete len:1767 (+) comp255740_c0_seq2:320-5620(+)	m.16607	atrina_contam.fasta	172687	1	14	32	300	0.00627	0.117	possibly correct	TRUE	02_1.32029.32029.2	GPmLQIPENFR	R	V	0.997	3.41	0.45	2		m3: Oxidation (+15.99)	659.335	1316.66	1317.66	2	0.000211	0.1601	5602.94	17242400	21633600	1443	1453	TRUE
02_1	Uncategorized Sample	BioSample 1	02_1	g.16607 ORF g.16607 m.16607 type:complete len:1767 (+) comp255740_c0_seq2:320-5620(+)	m.16607	atrina_contam.fasta	172687	1	14	32	300	0.00627	0.117	possibly correct	TRUE	02_1.30676.30676.2	GPmLQIPENFR	R	V	0.997	3.38	0.458	2		m3: Oxidation (+15.99)	659.335	1316.65	1317.66	2	-0.000297	-0.2254	5420.01	50368400	48020900	1443	1453	TRUE
02_1	Uncategorized Sample	BioSample 1	02_1	g.16607 ORF g.16607 m.16607 type:complete len:1767 (+) comp255740_c0_seq2:320-5620(+)	m.16607	atrina_contam.fasta	172687	1	14	32	300	0.00627	0.117	possibly correct	TRUE	02_1.52688.52688.3	GPNGEPGLPGLPGSIPPSGFLIVR	R	H	0.976	2.32	0.395	2			776.762	2327.26	2328.27	3	-0.000766	-0.329	8832.83	67026.7	81755	1525	1548	TRUE
02_1	Uncategorized Sample	BioSample 1	02_1	g.16607 ORF g.16607 m.16607 type:complete len:1767 (+) comp255740_c0_seq2:320-5620(+)	m.16607	atrina_contam.fasta	172687	1	14	32	300	0.00627	0.117	possibly correct	TRUE	02_1.52695.52695.2	GPNGEPGLPGLPGSIPPSGFLIVR	R	H	0.984	2.16	0.583	2			1164.64	2327.26	2328.27	2	-0.002263	-0.972	8834.08	77977.6	128545	1525	1548	TRUE
02_1	Uncategorized Sample	BioSample 1	02_1	g.16607 ORF g.16607 m.16607 type:complete len:1767 (+) comp255740_c0_seq2:320-5620(+)	m.16607	atrina_contam.fasta	172687	1	14	32	300	0.00627	0.117	possibly correct	TRUE	02_1.54069.54069.3	GPNGEPGLPGLPGSIPPSGFLIVR	R	H	0.997	3.3	0.494	2			777.09	2328.25	2328.27	3	0.9829	-8.515	9134.15	1445460	2363560	1525	1548	TRUE
02_1	Uncategorized Sample	BioSample 1	02_1	g.16607 ORF g.16607 m.16607 type:complete len:1767 (+) comp255740_c0_seq2:320-5620(+)	m.16607	atrina_contam.fasta	172687	1	14	32	300	0.00627	0.117	possibly correct	TRUE	02_1.52785.52785.3	GPNGEPGLPGLPGSIPPSGFLIVR	R	H	0.997	3.24	0.435	2			776.762	2327.27	2328.27	3	0.000875	0.3758	8853.48	280053	555572	1525	1548	TRUE
02_1	Uncategorized Sample	BioSample 1	02_1	g.16607 ORF g.16607 m.16607 type:complete len:1767 (+) comp255740_c0_seq2:320-5620(+)	m.16607	atrina_contam.fasta	172687	1	14	32	300	0.00627	0.117	possibly correct	TRUE	02_1.52990.52990.3	GPNGEPGLPGLPGSIPPSGFLIVR	R	H	0.997	3.4	0.44	2			776.762	2327.26	2328.27	3	1.8e-05	0.007731	8894.22	394546	633126	1525	1548	TRUE
02_1	Uncategorized Sample	BioSample 1	02_1	g.16607 ORF g.16607 m.16607 type:complete len:1767 (+) comp255740_c0_seq2:320-5620(+)	m.16607	atrina_contam.fasta	172687	1	14	32	300	0.00627	0.117	possibly correct	TRUE	02_1.53887.53887.3	GPNGEPGLPGLPGSIPPSGFLIVR	R	H	0.997	3.67	0.496	2			777.09	2328.25	2328.27	3	0.9842	-7.969	9093.16	1156630	3290780	1525	1548	TRUE
02_1	Uncategorized Sample	BioSample 1	02_1	g.16607 ORF g.16607 m.16607 type:complete len:1767 (+) comp255740_c0_seq2:320-5620(+)	m.16607	atrina_contam.fasta	172687	1	14	32	300	0.00627	0.117	possibly correct	TRUE	02_1.54201.54201.2	GPNGEPGLPGLPGSIPPSGFLIVR	R	H	0.997	3.08	0.528	2			1165.13	2328.25	2328.27	2	0.9862	-7.106	9167.42	297716	811282	1525	1548	TRUE
02_1	Uncategorized Sample	BioSample 1	02_1	g.16607 ORF g.16607 m.16607 type:complete len:1767 (+) comp255740_c0_seq2:320-5620(+)	m.16607	atrina_contam.fasta	172687	1	14	32	300	0.00627	0.117	possibly correct	TRUE	02_1.54033.54033.2	GPNGEPGLPGLPGSIPPSGFLIVR	R	H	0.997	3.67	0.53	2			1165.13	2328.25	2328.27	2	0.9814	-9.154	9125.95	1958590	5491830	1525	1548	TRUE
02_1	Uncategorized Sample	BioSample 1	02_1	g.16607 ORF g.16607 m.16607 type:complete len:1767 (+) comp255740_c0_seq2:320-5620(+)	m.16607	atrina_contam.fasta	172687	1	14	32	300	0.00627	0.117	possibly correct	TRUE	02_1.53657.53657.2	GPNGEPGLPGLPGSIPPSGFLIVR	R	H	0.997	3.2	0.584	2			1165.13	2328.25	2328.27	2	0.9827	-8.58	9043.3	373047	898883	1525	1548	TRUE
02_1	Uncategorized Sample	BioSample 1	02_1	g.16607 ORF g.16607 m.16607 type:complete len:1767 (+) comp255740_c0_seq2:320-5620(+)	m.16607	atrina_contam.fasta	172687	1	14	32	300	0.00627	0.117	possibly correct	TRUE	02_1.53843.53843.2	GPNGEPGLPGLPGSIPPSGFLIVR	R	H	0.997	3.4	0.57	2			1165.13	2328.25	2328.27	2	0.9825	-8.665	9084.58	562271	1549530	1525	1548	TRUE
02_1	Uncategorized Sample	BioSample 1	02_1	g.16607 ORF g.16607 m.16607 type:complete len:1767 (+) comp255740_c0_seq2:320-5620(+)	m.16607	atrina_contam.fasta	172687	1	14	32	300	0.00627	0.117	possibly correct	TRUE	02_1.54121.54121.2	GPNGEPGLPGLPGSIPPSGFLIVR	R	H	0.997	3.66	0.578	2			1165.13	2328.25	2328.27	2	0.9827	-8.614	9146.73	970497	2815790	1525	1548	TRUE
02_1	Uncategorized Sample	BioSample 1	02_1	g.16607 ORF g.16607 m.16607 type:complete len:1767 (+) comp255740_c0_seq2:320-5620(+)	m.16607	atrina_contam.fasta	172687	1	14	32	300	0.00627	0.117	possibly correct	TRUE	02_1.53565.53565.2	GPNGEPGLPGLPGSIPPSGFLIVR	R	H	0.997	3.51	0.607	2			1165.13	2328.25	2328.27	2	0.9831	-8.408	9022.07	671053	1651850	1525	1548	TRUE
02_1	Uncategorized Sample	BioSample 1	02_1	g.16607 ORF g.16607 m.16607 type:complete len:1767 (+) comp255740_c0_seq2:320-5620(+)	m.16607	atrina_contam.fasta	172687	1	14	32	300	0.00627	0.117	possibly correct	TRUE	02_1.53947.53947.2	GPNGEPGLPGLPGSIPPSGFLIVR	R	H	0.997	3.77	0.604	2			1165.13	2328.25	2328.27	2	0.9824	-8.739	9105.43	2155210	5966890	1525	1548	TRUE
02_1	Uncategorized Sample	BioSample 1	02_1	g.16607 ORF g.16607 m.16607 type:complete len:1767 (+) comp255740_c0_seq2:320-5620(+)	m.16607	atrina_contam.fasta	172687	1	14	32	300	0.00627	0.117	possibly correct	TRUE	02_1.53466.53466.2	GPNGEPGLPGLPGSIPPSGFLIVR	R	H	0.997	3.61	0.658	2			1165.13	2328.25	2328.27	2	0.9836	-8.214	9001.77	612719	1311930	1525	1548	TRUE
02_1	Uncategorized Sample	BioSample 1	02_1	g.16607 ORF g.16607 m.16607 type:complete len:1767 (+) comp255740_c0_seq2:320-5620(+)	m.16607	atrina_contam.fasta	172687	1	14	32	300	0.00627	0.117	possibly correct	TRUE	02_1.53983.53983.3	GPNGEPGLPGLPGSIPPSGFLIVR	R	H	0.997	3.61	0.532	2			777.09	2328.25	2328.27	3	0.983	-8.452	9113.56	1720360	3472970	1525	1548	TRUE
02_1	Uncategorized Sample	BioSample 1	02_1	g.16607 ORF g.16607 m.16607 type:complete len:1767 (+) comp255740_c0_seq2:320-5620(+)	m.16607	atrina_contam.fasta	172687	1	14	32	300	0.00627	0.117	possibly correct	TRUE	02_1.53084.53084.2	GPNGEPGLPGLPGSIPPSGFLIVR	R	H	0.997	3.54	0.688	2			1164.64	2327.26	2328.27	2	-0.001572	-0.6752	8916.41	210241	404692	1525	1548	TRUE
02_1	Uncategorized Sample	BioSample 1	02_1	g.16607 ORF g.16607 m.16607 type:complete len:1767 (+) comp255740_c0_seq2:320-5620(+)	m.16607	atrina_contam.fasta	172687	1	14	32	300	0.00627	0.117	possibly correct	TRUE	02_1.52791.52791.2	GPNGEPGLPGLPGSIPPSGFLIVR	R	H	0.997	3.99	0.711	2			1164.64	2327.26	2328.27	2	-0.00224	-0.9621	8854.62	414815	1049720	1525	1548	TRUE
02_1	Uncategorized Sample	BioSample 1	02_1	g.16607 ORF g.16607 m.16607 type:complete len:1767 (+) comp255740_c0_seq2:320-5620(+)	m.16607	atrina_contam.fasta	172687	1	14	32	300	0.00627	0.117	possibly correct	TRUE	02_1.52886.52886.3	GPNGEPGLPGLPGSIPPSGFLIVR	R	H	0.997	3.67	0.588	2			776.762	2327.26	2328.27	3	-4.3e-05	-0.01847	8873.79	541073	1035790	1525	1548	TRUE
02_1	Uncategorized Sample	BioSample 1	02_1	g.16607 ORF g.16607 m.16607 type:complete len:1767 (+) comp255740_c0_seq2:320-5620(+)	m.16607	atrina_contam.fasta	172687	1	14	32	300	0.00627	0.117	possibly correct	TRUE	02_1.52997.52997.2	GPNGEPGLPGLPGSIPPSGFLIVR	R	H	0.997	4.41	0.764	2			1164.64	2327.26	2328.27	2	-0.00114	-0.4896	8895.48	509757	1236150	1525	1548	TRUE
02_1	Uncategorized Sample	BioSample 1	02_1	g.16607 ORF g.16607 m.16607 type:complete len:1767 (+) comp255740_c0_seq2:320-5620(+)	m.16607	atrina_contam.fasta	172687	1	14	32	300	0.00627	0.117	possibly correct	TRUE	02_1.52893.52893.2	GPNGEPGLPGLPGSIPPSGFLIVR	R	H	0.997	5.01	0.778	2			1164.64	2327.26	2328.27	2	-0.000783	-0.3363	8875.03	785016	1964900	1525	1548	TRUE
02_1	Uncategorized Sample	BioSample 1	02_1	g.16607 ORF g.16607 m.16607 type:complete len:1767 (+) comp255740_c0_seq2:320-5620(+)	m.16607	atrina_contam.fasta	172687	1	14	32	300	0.00627	0.117	possibly correct	TRUE	02_1.50332.50332.2	GTGQLWSGYSLLYIEGNER	R	S	0.994	2.62	0.579	2			1072.02	2142.03	2143.05	2	-0.00373	-1.741	8368.97	76012.7	44550	1561	1579	TRUE
02_1	Uncategorized Sample	BioSample 1	02_1	g.16607 ORF g.16607 m.16607 type:complete len:1767 (+) comp255740_c0_seq2:320-5620(+)	m.16607	atrina_contam.fasta	172687	1	14	32	300	0.00627	0.117	possibly correct	TRUE	02_1.49972.49972.2	GTGQLWSGYSLLYIEGNER	R	S	0.997	3.21	0.522	2			1072.52	2143.02	2143.05	2	0.984	-8.745	8306.04	1825420	2653200	1561	1579	TRUE
02_1	Uncategorized Sample	BioSample 1	02_1	g.16607 ORF g.16607 m.16607 type:complete len:1767 (+) comp255740_c0_seq2:320-5620(+)	m.16607	atrina_contam.fasta	172687	1	14	32	300	0.00627	0.117	possibly correct	TRUE	02_1.49866.49866.2	GTGQLWSGYSLLYIEGNER	R	S	0.997	3.74	0.592	2			1072.53	2143.04	2143.05	2	0.9989	-1.796	8285.57	115268	158517	1561	1579	TRUE
02_1	Uncategorized Sample	BioSample 1	02_1	g.16607 ORF g.16607 m.16607 type:complete len:1767 (+) comp255740_c0_seq2:320-5620(+)	m.16607	atrina_contam.fasta	172687	1	14	32	300	0.00627	0.117	possibly correct	TRUE	02_1.50219.50219.2	GTGQLWSGYSLLYIEGNER	R	S	0.997	3.41	0.667	2			1072.53	2143.04	2143.05	2	1.003	0.2562	8347.83	106109	72691	1561	1579	TRUE
02_1	Uncategorized Sample	BioSample 1	02_1	g.16607 ORF g.16607 m.16607 type:complete len:1767 (+) comp255740_c0_seq2:320-5620(+)	m.16607	atrina_contam.fasta	172687	1	14	32	300	0.00627	0.117	possibly correct	TRUE	02_1.49579.49579.2	GTGQLWSGYSLLYIEGNER	R	S	0.997	3.93	0.627	2			1072.53	2143.04	2143.05	2	1.006	1.749	8233.1	107844	114105	1561	1579	TRUE
02_1	Uncategorized Sample	BioSample 1	02_1	g.16607 ORF g.16607 m.16607 type:complete len:1767 (+) comp255740_c0_seq2:320-5620(+)	m.16607	atrina_contam.fasta	172687	1	14	32	300	0.00627	0.117	possibly correct	TRUE	02_1.50089.50089.2	GTGQLWSGYSLLYIEGNER	R	S	0.997	3.66	0.668	2			1072.52	2143.03	2143.05	2	0.9882	-6.763	8326.78	173357	173460	1561	1579	TRUE
02_1	Uncategorized Sample	BioSample 1	02_1	g.16607 ORF g.16607 m.16607 type:complete len:1767 (+) comp255740_c0_seq2:320-5620(+)	m.16607	atrina_contam.fasta	172687	1	14	32	300	0.00627	0.117	possibly correct	TRUE	02_1.49703.49703.2	GTGQLWSGYSLLYIEGNER	R	S	0.997	3.9	0.685	2			1072.52	2143.03	2143.05	2	0.9937	-4.221	8253.78	173109	188136	1561	1579	TRUE
02_1	Uncategorized Sample	BioSample 1	02_1	g.16607 ORF g.16607 m.16607 type:complete len:1767 (+) comp255740_c0_seq2:320-5620(+)	m.16607	atrina_contam.fasta	172687	1	14	32	300	0.00627	0.117	possibly correct	TRUE	02_1.48368.48368.3	GTGQLWSGYSLLYIEGNER	R	S	0.997	3.67	0.523	2			715.02	2142.04	2143.05	3	0.00071	0.3313	8016.25	13020500	3212670	1561	1579	TRUE
02_1	Uncategorized Sample	BioSample 1	02_1	g.16607 ORF g.16607 m.16607 type:complete len:1767 (+) comp255740_c0_seq2:320-5620(+)	m.16607	atrina_contam.fasta	172687	1	14	32	300	0.00627	0.117	possibly correct	TRUE	02_1.49351.49351.2	GTGQLWSGYSLLYIEGNER	R	S	0.997	4.67	0.668	2			1072.53	2143.04	2143.05	2	1.002	-0.2102	8191.53	154875	272904	1561	1579	TRUE
02_1	Uncategorized Sample	BioSample 1	02_1	g.16607 ORF g.16607 m.16607 type:complete len:1767 (+) comp255740_c0_seq2:320-5620(+)	m.16607	atrina_contam.fasta	172687	1	14	32	300	0.00627	0.117	possibly correct	TRUE	02_1.49245.49245.2	GTGQLWSGYSLLYIEGNER	R	S	0.997	4.41	0.71	2			1072.52	2143.02	2143.05	2	0.9862	-7.722	8170.92	934855	1523150	1561	1579	TRUE
02_1	Uncategorized Sample	BioSample 1	02_1	g.16607 ORF g.16607 m.16607 type:complete len:1767 (+) comp255740_c0_seq2:320-5620(+)	m.16607	atrina_contam.fasta	172687	1	14	32	300	0.00627	0.117	possibly correct	TRUE	02_1.48900.48900.2	GTGQLWSGYSLLYIEGNER	R	S	0.997	4.65	0.67	2			1072.03	2142.04	2143.05	2	0.001809	0.8441	8108.43	310452	416893	1561	1579	TRUE
02_1	Uncategorized Sample	BioSample 1	02_1	g.16607 ORF g.16607 m.16607 type:complete len:1767 (+) comp255740_c0_seq2:320-5620(+)	m.16607	atrina_contam.fasta	172687	1	14	32	300	0.00627	0.117	possibly correct	TRUE	02_1.48564.48564.2	GTGQLWSGYSLLYIEGNER	R	S	0.997	5.4	0.624	2			1072.03	2142.04	2143.05	2	0.000459	0.2142	8046.45	2272440	3291210	1561	1579	TRUE
02_1	Uncategorized Sample	BioSample 1	02_1	g.16607 ORF g.16607 m.16607 type:complete len:1767 (+) comp255740_c0_seq2:320-5620(+)	m.16607	atrina_contam.fasta	172687	1	14	32	300	0.00627	0.117	possibly correct	TRUE	02_1.48432.48432.2	GTGQLWSGYSLLYIEGNER	R	S	0.997	5.23	0.634	2			1072.03	2142.04	2143.05	2	0.000686	0.3201	8025.3	30517200	46367500	1561	1579	TRUE
02_1	Uncategorized Sample	BioSample 1	02_1	g.16607 ORF g.16607 m.16607 type:complete len:1767 (+) comp255740_c0_seq2:320-5620(+)	m.16607	atrina_contam.fasta	172687	1	14	32	300	0.00627	0.117	possibly correct	TRUE	02_1.49455.49455.2	GTGQLWSGYSLLYIEGNER	R	S	0.997	4.44	0.692	2			1072.03	2142.04	2143.05	2	-0.002341	-1.092	8211.97	160159	175775	1561	1579	TRUE
02_1	Uncategorized Sample	BioSample 1	02_1	g.16607 ORF g.16607 m.16607 type:complete len:1767 (+) comp255740_c0_seq2:320-5620(+)	m.16607	atrina_contam.fasta	172687	1	14	32	300	0.00627	0.117	possibly correct	TRUE	02_1.48790.48790.2	GTGQLWSGYSLLYIEGNER	R	S	0.997	4.98	0.656	2			1072.03	2142.04	2143.05	2	0.001601	0.7471	8087.51	511453	780897	1561	1579	TRUE
02_1	Uncategorized Sample	BioSample 1	02_1	g.16607 ORF g.16607 m.16607 type:complete len:1767 (+) comp255740_c0_seq2:320-5620(+)	m.16607	atrina_contam.fasta	172687	1	14	32	300	0.00627	0.117	possibly correct	TRUE	02_1.48295.48295.2	GTGQLWSGYSLLYIEGNER	R	S	0.997	5.46	0.641	2			1072.03	2142.04	2143.05	2	-0.00034	-0.1587	8004.95	13735500	24447800	1561	1579	TRUE
02_1	Uncategorized Sample	BioSample 1	02_1	g.16607 ORF g.16607 m.16607 type:complete len:1767 (+) comp255740_c0_seq2:320-5620(+)	m.16607	atrina_contam.fasta	172687	1	14	32	300	0.00627	0.117	possibly correct	TRUE	02_1.49132.49132.2	GTGQLWSGYSLLYIEGNER	R	S	0.997	4.43	0.714	2			1072.03	2142.04	2143.05	2	-0.001921	-0.8964	8150.28	221848	248030	1561	1579	TRUE
02_1	Uncategorized Sample	BioSample 1	02_1	g.16607 ORF g.16607 m.16607 type:complete len:1767 (+) comp255740_c0_seq2:320-5620(+)	m.16607	atrina_contam.fasta	172687	1	14	32	300	0.00627	0.117	possibly correct	TRUE	02_1.48674.48674.2	GTGQLWSGYSLLYIEGNER	R	S	0.997	5.15	0.665	2			1072.03	2142.04	2143.05	2	0.001196	0.5581	8066.87	836588	1445440	1561	1579	TRUE
02_1	Uncategorized Sample	BioSample 1	02_1	g.16607 ORF g.16607 m.16607 type:complete len:1767 (+) comp255740_c0_seq2:320-5620(+)	m.16607	atrina_contam.fasta	172687	1	14	32	300	0.00627	0.117	possibly correct	TRUE	02_1.49013.49013.2	GTGQLWSGYSLLYIEGNER	R	S	0.997	4.42	0.72	2			1072.03	2142.04	2143.05	2	-0.000534	-0.2492	8129.68	252016	258497	1561	1579	TRUE
02_1	Uncategorized Sample	BioSample 1	02_1	g.16607 ORF g.16607 m.16607 type:complete len:1767 (+) comp255740_c0_seq2:320-5620(+)	m.16607	atrina_contam.fasta	172687	1	14	32	300	0.00627	0.117	possibly correct	TRUE	02_1.48510.48510.3	GTGQLWSGYSLLYIEGNER	R	S	0.997	4.32	0.581	2			715.021	2142.04	2143.05	3	0.001347	0.6285	8037.47	717202	665720	1561	1579	TRUE
02_1	Uncategorized Sample	BioSample 1	02_1	g.16607 ORF g.16607 m.16607 type:complete len:1767 (+) comp255740_c0_seq2:320-5620(+)	m.16607	atrina_contam.fasta	172687	1	14	32	300	0.00627	0.117	possibly correct	TRUE	02_1.42114.42114.3	NDKSYWLATNAPmPMMPVGEQEIPR	R	Y	0.985	1.76	0.555	2		m13: Oxidation (+15.99)	964.791	2891.35	2891.35	3	1.006	1.23	7023.69	82194	60058	1615	1639	TRUE
02_1	Uncategorized Sample	BioSample 1	02_1	g.16607 ORF g.16607 m.16607 type:complete len:1767 (+) comp255740_c0_seq2:320-5620(+)	m.16607	atrina_contam.fasta	172687	1	14	32	300	0.00627	0.117	possibly correct	TRUE	02_1.41824.41824.3	NDKSYWLATNAPMPmMPVGEQEIPR	R	Y	0.997	3.13	0.567	2		m15: Oxidation (+15.99)	964.46	2890.36	2891.35	3	0.01119	3.869	6980.06	67516.6	131666	1615	1639	TRUE
02_1	Uncategorized Sample	BioSample 1	02_1	g.16607 ORF g.16607 m.16607 type:complete len:1767 (+) comp255740_c0_seq2:320-5620(+)	m.16607	atrina_contam.fasta	172687	1	14	32	300	0.00627	0.117	possibly correct	TRUE	02_1.40283.40283.3	NDKSYWLATNAPMPMmPVGEQEIPR	R	Y	0.997	4.36	0.587	2		m16: Oxidation (+15.99)	964.791	2891.35	2891.35	3	1.006	1.022	6758.47	247320	589493	1615	1639	TRUE
02_1	Uncategorized Sample	BioSample 1	02_1	g.16607 ORF g.16607 m.16607 type:complete len:1767 (+) comp255740_c0_seq2:320-5620(+)	m.16607	atrina_contam.fasta	172687	1	14	32	300	0.00627	0.117	possibly correct	TRUE	02_1.35647.35647.3	NDKSYWLATNAPMPmmPVGEQEIPR	R	Y	0.997	4.55	0.579	2		m15: Oxidation (+15.99), m16: Oxidation (+15.99)	969.788	2906.34	2907.35	3	0.000724	0.249	6105.69	741056	1209730	1615	1639	TRUE
02_1	Uncategorized Sample	BioSample 1	02_1	g.16607 ORF g.16607 m.16607 type:complete len:1767 (+) comp255740_c0_seq2:320-5620(+)	m.16607	atrina_contam.fasta	172687	1	14	32	300	0.00627	0.117	possibly correct	TRUE	02_1.12639.12639.3	SQHQDLGWAGScmQR	R	F	0.985	2.78	0.23	2	c12: Carbamidomethyl (+57.02)	m13: Oxidation (+15.99)	592.923	1775.75	1776.75	3	0.001086	0.6111	3011.77	1908230	1579200	1580	1594	TRUE
02_1	Uncategorized Sample	BioSample 1	02_1	g.16607 ORF g.16607 m.16607 type:complete len:1767 (+) comp255740_c0_seq2:320-5620(+)	m.16607	atrina_contam.fasta	172687	1	14	32	300	0.00627	0.117	possibly correct	TRUE	02_1.8895.8895.3	SQHQDLGWAGScmQR	R	F	0.989	2.59	0.273	2	c12: Carbamidomethyl (+57.02)	m13: Oxidation (+15.99)	592.923	1775.75	1776.75	3	0.0001067	0.06005	2515.14	1723960	1294810	1580	1594	TRUE
02_1	Uncategorized Sample	BioSample 1	02_1	g.16607 ORF g.16607 m.16607 type:complete len:1767 (+) comp255740_c0_seq2:320-5620(+)	m.16607	atrina_contam.fasta	172687	1	14	32	300	0.00627	0.117	possibly correct	TRUE	02_1.13955.13955.3	SQHQDLGWAGScmQR	R	F	0.989	3.3	0.132	2	c12: Carbamidomethyl (+57.02)	m13: Oxidation (+15.99)	592.923	1775.75	1776.75	3	3.169e-05	0.01784	3186.67	1496590	3260780	1580	1594	TRUE
02_1	Uncategorized Sample	BioSample 1	02_1	g.16607 ORF g.16607 m.16607 type:complete len:1767 (+) comp255740_c0_seq2:320-5620(+)	m.16607	atrina_contam.fasta	172687	1	14	32	300	0.00627	0.117	possibly correct	TRUE	02_1.13619.13619.3	SQHQDLGWAGScmQR	R	F	0.99	3.07	0.273	2	c12: Carbamidomethyl (+57.02)	m13: Oxidation (+15.99)	592.923	1775.75	1776.75	3	0.0003167	0.1782	3141.67	1409040	2200420	1580	1594	TRUE
02_1	Uncategorized Sample	BioSample 1	02_1	g.16607 ORF g.16607 m.16607 type:complete len:1767 (+) comp255740_c0_seq2:320-5620(+)	m.16607	atrina_contam.fasta	172687	1	14	32	300	0.00627	0.117	possibly correct	TRUE	02_1.8570.8570.3	SQHQDLGWAGScmQR	R	F	0.991	3.22	0.2	2	c12: Carbamidomethyl (+57.02)	m13: Oxidation (+15.99)	592.923	1775.75	1776.75	3	-0.0003793	-0.2135	2472.45	8894680	15444800	1580	1594	TRUE
02_1	Uncategorized Sample	BioSample 1	02_1	g.16607 ORF g.16607 m.16607 type:complete len:1767 (+) comp255740_c0_seq2:320-5620(+)	m.16607	atrina_contam.fasta	172687	1	14	32	300	0.00627	0.117	possibly correct	TRUE	02_1.14353.14353.3	SQHQDLGWAGScmQR	R	F	0.992	2.86	0.275	2	c12: Carbamidomethyl (+57.02)	m13: Oxidation (+15.99)	592.923	1775.75	1776.75	3	0.0008907	0.5013	3238.93	1115070	1269170	1580	1594	TRUE
02_1	Uncategorized Sample	BioSample 1	02_1	g.16607 ORF g.16607 m.16607 type:complete len:1767 (+) comp255740_c0_seq2:320-5620(+)	m.16607	atrina_contam.fasta	172687	1	14	32	300	0.00627	0.117	possibly correct	TRUE	02_1.12800.12800.3	SQHQDLGWAGScmQR	R	F	0.992	3.33	0.179	2	c12: Carbamidomethyl (+57.02)	m13: Oxidation (+15.99)	592.923	1775.75	1776.75	3	0.0009277	0.5221	3033.2	2793230	3365910	1580	1594	TRUE
02_1	Uncategorized Sample	BioSample 1	02_1	g.16607 ORF g.16607 m.16607 type:complete len:1767 (+) comp255740_c0_seq2:320-5620(+)	m.16607	atrina_contam.fasta	172687	1	14	32	300	0.00627	0.117	possibly correct	TRUE	02_1.12159.12159.3	SQHQDLGWAGScmQR	R	F	0.993	3.29	0.197	2	c12: Carbamidomethyl (+57.02)	m13: Oxidation (+15.99)	592.923	1775.75	1776.75	3	0.0008727	0.4912	2947.92	3329070	4433220	1580	1594	TRUE
02_1	Uncategorized Sample	BioSample 1	02_1	g.16607 ORF g.16607 m.16607 type:complete len:1767 (+) comp255740_c0_seq2:320-5620(+)	m.16607	atrina_contam.fasta	172687	1	14	32	300	0.00627	0.117	possibly correct	TRUE	02_1.11363.11363.3	SQHQDLGWAGScmQR	R	F	0.996	3.12	0.262	2	c12: Carbamidomethyl (+57.02)	m13: Oxidation (+15.99)	592.923	1775.75	1776.75	3	2.269e-05	0.01277	2842.98	1424490	1211970	1580	1594	TRUE
02_1	Uncategorized Sample	BioSample 1	02_1	g.16607 ORF g.16607 m.16607 type:complete len:1767 (+) comp255740_c0_seq2:320-5620(+)	m.16607	atrina_contam.fasta	172687	1	14	32	300	0.00627	0.117	possibly correct	TRUE	02_1.11999.11999.3	SQHQDLGWAGScmQR	R	F	0.997	3.86	0.206	2	c12: Carbamidomethyl (+57.02)	m13: Oxidation (+15.99)	592.923	1775.75	1776.75	3	0.0002017	0.1135	2927.21	6640400	7099640	1580	1594	TRUE
02_1	Uncategorized Sample	BioSample 1	02_1	g.16607 ORF g.16607 m.16607 type:complete len:1767 (+) comp255740_c0_seq2:320-5620(+)	m.16607	atrina_contam.fasta	172687	1	14	32	300	0.00627	0.117	possibly correct	TRUE	02_1.15237.15237.3	SQHQDLGWAGScMQR	R	F	0.997	2.96	0.445	2	c12: Carbamidomethyl (+57.02)		587.591	1759.75	1760.76	3	-0.001164	-0.6613	3355.58	833974	616771	1580	1594	TRUE
02_1	Uncategorized Sample	BioSample 1	02_1	g.16607 ORF g.16607 m.16607 type:complete len:1767 (+) comp255740_c0_seq2:320-5620(+)	m.16607	atrina_contam.fasta	172687	1	14	32	300	0.00627	0.117	possibly correct	TRUE	02_1.15395.15395.3	SQHQDLGWAGScMQR	R	F	0.997	2.96	0.525	2	c12: Carbamidomethyl (+57.02)		587.591	1759.75	1760.76	3	-0.0006023	-0.3421	3376.75	458753	449136	1580	1594	TRUE
02_1	Uncategorized Sample	BioSample 1	02_1	g.16607 ORF g.16607 m.16607 type:complete len:1767 (+) comp255740_c0_seq2:320-5620(+)	m.16607	atrina_contam.fasta	172687	1	14	32	300	0.00627	0.117	possibly correct	TRUE	02_1.8736.8736.3	SQHQDLGWAGScmQR	R	F	0.997	3.73	0.28	2	c12: Carbamidomethyl (+57.02)	m13: Oxidation (+15.99)	592.923	1775.75	1776.75	3	6.069e-05	0.03416	2494.27	5909730	5137870	1580	1594	TRUE
02_1	Uncategorized Sample	BioSample 1	02_1	g.16607 ORF g.16607 m.16607 type:complete len:1767 (+) comp255740_c0_seq2:320-5620(+)	m.16607	atrina_contam.fasta	172687	1	14	32	300	0.00627	0.117	possibly correct	TRUE	02_1.11679.11679.3	SQHQDLGWAGScmQR	R	F	0.997	4	0.271	2	c12: Carbamidomethyl (+57.02)	m13: Oxidation (+15.99)	592.923	1775.75	1776.75	3	0.0004687	0.2638	2885.11	8707230	9364820	1580	1594	TRUE
02_1	Uncategorized Sample	BioSample 1	02_1	g.16607 ORF g.16607 m.16607 type:complete len:1767 (+) comp255740_c0_seq2:320-5620(+)	m.16607	atrina_contam.fasta	172687	1	14	32	300	0.00627	0.117	possibly correct	TRUE	02_1.11839.11839.3	SQHQDLGWAGScmQR	R	F	0.997	3.96	0.292	2	c12: Carbamidomethyl (+57.02)	m13: Oxidation (+15.99)	592.923	1775.75	1776.75	3	-0.0001993	-0.1122	2906.26	7805090	10646300	1580	1594	TRUE
02_1	Uncategorized Sample	BioSample 1	02_1	g.16607 ORF g.16607 m.16607 type:complete len:1767 (+) comp255740_c0_seq2:320-5620(+)	m.16607	atrina_contam.fasta	172687	1	14	32	300	0.00627	0.117	possibly correct	TRUE	02_1.11519.11519.3	SQHQDLGWAGScmQR	R	F	0.997	3.79	0.313	2	c12: Carbamidomethyl (+57.02)	m13: Oxidation (+15.99)	592.923	1775.75	1776.75	3	0.0006697	0.3769	2863.96	7205370	9185930	1580	1594	TRUE
02_1	Uncategorized Sample	BioSample 1	02_1	g.16607 ORF g.16607 m.16607 type:complete len:1767 (+) comp255740_c0_seq2:320-5620(+)	m.16607	atrina_contam.fasta	172687	1	14	32	300	0.00627	0.117	possibly correct	TRUE	02_1.12950.12950.2	SQHQDLGWAGScmQR	R	F	0.997	3.15	0.605	2	c12: Carbamidomethyl (+57.02)	m13: Oxidation (+15.99)	888.881	1775.75	1776.75	2	0.0003067	0.1726	3053.21	271474	347595	1580	1594	TRUE
02_1	Uncategorized Sample	BioSample 1	02_1	g.16607 ORF g.16607 m.16607 type:complete len:1767 (+) comp255740_c0_seq2:320-5620(+)	m.16607	atrina_contam.fasta	172687	1	14	32	300	0.00627	0.117	possibly correct	TRUE	02_1.12780.12780.2	SQHQDLGWAGScmQR	R	F	0.997	3.17	0.662	2	c12: Carbamidomethyl (+57.02)	m13: Oxidation (+15.99)	889.379	1776.74	1776.75	2	0.9957	-3.955	3030.58	324538	336820	1580	1594	TRUE
02_1	Uncategorized Sample	BioSample 1	02_1	g.16607 ORF g.16607 m.16607 type:complete len:1767 (+) comp255740_c0_seq2:320-5620(+)	m.16607	atrina_contam.fasta	172687	1	14	32	300	0.00627	0.117	possibly correct	TRUE	02_1.11623.11623.2	SQHQDLGWAGScmQR	R	F	0.997	3.94	0.625	2	c12: Carbamidomethyl (+57.02)	m13: Oxidation (+15.99)	889.383	1776.75	1776.75	2	1.004	0.8826	2877.55	1264830	2143240	1580	1594	TRUE
02_1	Uncategorized Sample	BioSample 1	02_1	g.16607 ORF g.16607 m.16607 type:complete len:1767 (+) comp255740_c0_seq2:320-5620(+)	m.16607	atrina_contam.fasta	172687	1	14	32	300	0.00627	0.117	possibly correct	TRUE	02_1.8705.8705.2	SQHQDLGWAGScmQR	R	F	0.997	3.63	0.675	2	c12: Carbamidomethyl (+57.02)	m13: Oxidation (+15.99)	888.881	1775.75	1776.75	2	0.0003657	0.2058	2490.15	889966	1117310	1580	1594	TRUE
02_1	Uncategorized Sample	BioSample 1	02_1	g.16607 ORF g.16607 m.16607 type:complete len:1767 (+) comp255740_c0_seq2:320-5620(+)	m.16607	atrina_contam.fasta	172687	1	14	32	300	0.00627	0.117	possibly correct	TRUE	02_1.8545.8545.2	SQHQDLGWAGScmQR	R	F	0.997	3.58	0.693	2	c12: Carbamidomethyl (+57.02)	m13: Oxidation (+15.99)	888.882	1775.75	1776.75	2	0.001898	1.068	2469.1	415436	854388	1580	1594	TRUE
02_1	Uncategorized Sample	BioSample 1	02_1	g.16607 ORF g.16607 m.16607 type:complete len:1767 (+) comp255740_c0_seq2:320-5620(+)	m.16607	atrina_contam.fasta	172687	1	14	32	300	0.00627	0.117	possibly correct	TRUE	02_1.11443.11443.2	SQHQDLGWAGScmQR	R	F	0.997	3.57	0.694	2	c12: Carbamidomethyl (+57.02)	m13: Oxidation (+15.99)	888.881	1775.75	1776.75	2	-0.0003893	-0.2191	2853.61	553363	964368	1580	1594	TRUE
02_1	Uncategorized Sample	BioSample 1	02_1	g.16607 ORF g.16607 m.16607 type:complete len:1767 (+) comp255740_c0_seq2:320-5620(+)	m.16607	atrina_contam.fasta	172687	1	14	32	300	0.00627	0.117	possibly correct	TRUE	02_1.14910.14910.3	SQHQDLGWAGScMQR	R	F	0.997	3.9	0.492	2	c12: Carbamidomethyl (+57.02)		587.592	1759.75	1760.76	3	0.001051	0.5967	3312.48	31411100	26185900	1580	1594	TRUE
02_1	Uncategorized Sample	BioSample 1	02_1	g.16607 ORF g.16607 m.16607 type:complete len:1767 (+) comp255740_c0_seq2:320-5620(+)	m.16607	atrina_contam.fasta	172687	1	14	32	300	0.00627	0.117	possibly correct	TRUE	02_1.12194.12194.2	SQHQDLGWAGScmQR	R	F	0.997	3.42	0.717	2	c12: Carbamidomethyl (+57.02)	m13: Oxidation (+15.99)	888.88	1775.75	1776.75	2	-0.001351	-0.7606	2952.48	431696	579574	1580	1594	TRUE
02_1	Uncategorized Sample	BioSample 1	02_1	g.16607 ORF g.16607 m.16607 type:complete len:1767 (+) comp255740_c0_seq2:320-5620(+)	m.16607	atrina_contam.fasta	172687	1	14	32	300	0.00627	0.117	possibly correct	TRUE	02_1.14927.14927.2	SQHQDLGWAGScMQR	R	F	0.997	4.23	0.646	2	c12: Carbamidomethyl (+57.02)		880.883	1759.75	1760.76	2	5.27e-05	0.02993	3314.61	2599310	3243740	1580	1594	TRUE
02_1	Uncategorized Sample	BioSample 1	02_1	g.16607 ORF g.16607 m.16607 type:complete len:1767 (+) comp255740_c0_seq2:320-5620(+)	m.16607	atrina_contam.fasta	172687	1	14	32	300	0.00627	0.117	possibly correct	TRUE	02_1.14755.14755.2	SQHQDLGWAGScMQR	R	F	0.997	4.47	0.672	2	c12: Carbamidomethyl (+57.02)		880.883	1759.75	1760.76	2	0.0002617	0.1486	3292.02	3315030	6253360	1580	1594	TRUE
02_1	Uncategorized Sample	BioSample 1	02_1	g.16607 ORF g.16607 m.16607 type:complete len:1767 (+) comp255740_c0_seq2:320-5620(+)	m.16607	atrina_contam.fasta	172687	1	14	32	300	0.00627	0.117	possibly correct	TRUE	02_1.14752.14752.3	SQHQDLGWAGScMQR	R	F	0.997	4.28	0.514	2	c12: Carbamidomethyl (+57.02)		587.591	1759.75	1760.76	3	0.0003997	0.227	3291.75	24469800	25016400	1580	1594	TRUE
02_1	Uncategorized Sample	BioSample 1	02_1	g.16607 ORF g.16607 m.16607 type:complete len:1767 (+) comp255740_c0_seq2:320-5620(+)	m.16607	atrina_contam.fasta	172687	1	14	32	300	0.00627	0.117	possibly correct	TRUE	02_1.15073.15073.3	SQHQDLGWAGScMQR	R	F	0.997	4.3	0.571	2	c12: Carbamidomethyl (+57.02)		587.591	1759.75	1760.76	3	0.0005337	0.3031	3333.96	2391740	1849800	1580	1594	TRUE
02_1	Uncategorized Sample	BioSample 1	02_1	g.16607 ORF g.16607 m.16607 type:complete len:1767 (+) comp255740_c0_seq2:320-5620(+)	m.16607	atrina_contam.fasta	172687	1	14	32	300	0.00627	0.117	possibly correct	TRUE	02_1.47576.47576.2	SYWLATNAPmPmMPVGEQEIPR	K	Y	0.977	1.82	0.55	2		m10: Oxidation (+15.99), m12: Oxidation (+15.99)	1275.6	2549.18	2550.18	2	0.003029	1.188	7878.03	79738.6	37265	1618	1639	TRUE
02_1	Uncategorized Sample	BioSample 1	02_1	g.16607 ORF g.16607 m.16607 type:complete len:1767 (+) comp255740_c0_seq2:320-5620(+)	m.16607	atrina_contam.fasta	172687	1	14	32	300	0.00627	0.117	possibly correct	TRUE	02_1.45005.45005.3	SYWLATNAPmPMmPVGEQEIPR	K	Y	0.98	2.28	0.476	2		m10: Oxidation (+15.99), m13: Oxidation (+15.99)	851.066	2550.18	2550.18	3	1.001	-0.8066	7451.55	157822	106815	1618	1639	TRUE
02_1	Uncategorized Sample	BioSample 1	02_1	g.16607 ORF g.16607 m.16607 type:complete len:1767 (+) comp255740_c0_seq2:320-5620(+)	m.16607	atrina_contam.fasta	172687	1	14	32	300	0.00627	0.117	possibly correct	TRUE	02_1.41566.41566.2	SYWLATNAPmPmmPVGEQEIPR	K	Y	0.98	2.38	0.479	2		m10: Oxidation (+15.99), m12: Oxidation (+15.99), m13: Oxidation (+15.99)	1283.59	2565.17	2566.18	2	-0.002039	-0.7946	6942.78	135905	164673	1618	1639	TRUE
02_1	Uncategorized Sample	BioSample 1	02_1	g.16607 ORF g.16607 m.16607 type:complete len:1767 (+) comp255740_c0_seq2:320-5620(+)	m.16607	atrina_contam.fasta	172687	1	14	32	300	0.00627	0.117	possibly correct	TRUE	02_1.39351.39351.2	SYWLATNAPmPmmPVGEQEIPR	K	Y	0.982	2.45	0.597	2		m10: Oxidation (+15.99), m12: Oxidation (+15.99), m13: Oxidation (+15.99)	1283.6	2565.18	2566.18	2	0.007008	2.731	6625.1	102562	128901	1618	1639	TRUE
02_1	Uncategorized Sample	BioSample 1	02_1	g.16607 ORF g.16607 m.16607 type:complete len:1767 (+) comp255740_c0_seq2:320-5620(+)	m.16607	atrina_contam.fasta	172687	1	14	32	300	0.00627	0.117	possibly correct	TRUE	02_1.39953.39953.3	SYWLATNAPmPmmPVGEQEIPR	K	Y	0.982	2.34	0.501	2		m10: Oxidation (+15.99), m12: Oxidation (+15.99), m13: Oxidation (+15.99)	856.063	2565.17	2566.18	3	-0.003244	-1.264	6711.87	160338	265741	1618	1639	TRUE
02_1	Uncategorized Sample	BioSample 1	02_1	g.16607 ORF g.16607 m.16607 type:complete len:1767 (+) comp255740_c0_seq2:320-5620(+)	m.16607	atrina_contam.fasta	172687	1	14	32	300	0.00627	0.117	possibly correct	TRUE	02_1.46810.46810.2	SYWLATNAPmPMmPVGEQEIPR	K	Y	0.984	2.18	0.589	2		m10: Oxidation (+15.99), m13: Oxidation (+15.99)	1276.1	2550.18	2550.18	2	1.007	1.575	7746.93	180239	111515	1618	1639	TRUE
02_1	Uncategorized Sample	BioSample 1	02_1	g.16607 ORF g.16607 m.16607 type:complete len:1767 (+) comp255740_c0_seq2:320-5620(+)	m.16607	atrina_contam.fasta	172687	1	14	32	300	0.00627	0.117	possibly correct	TRUE	02_1.40271.40271.3	SYWLATNAPmPmmPVGEQEIPR	K	Y	0.985	2.53	0.545	2		m10: Oxidation (+15.99), m12: Oxidation (+15.99), m13: Oxidation (+15.99)	856.401	2566.18	2566.18	3	1.012	3.594	6756.76	136152	142709	1618	1639	TRUE
02_1	Uncategorized Sample	BioSample 1	02_1	g.16607 ORF g.16607 m.16607 type:complete len:1767 (+) comp255740_c0_seq2:320-5620(+)	m.16607	atrina_contam.fasta	172687	1	14	32	300	0.00627	0.117	possibly correct	TRUE	02_1.39791.39791.3	SYWLATNAPmPmmPVGEQEIPR	K	Y	0.985	2.78	0.485	2		m10: Oxidation (+15.99), m12: Oxidation (+15.99), m13: Oxidation (+15.99)	856.396	2566.17	2566.18	3	0.9973	-2.132	6688.71	202268	297335	1618	1639	TRUE
02_1	Uncategorized Sample	BioSample 1	02_1	g.16607 ORF g.16607 m.16607 type:complete len:1767 (+) comp255740_c0_seq2:320-5620(+)	m.16607	atrina_contam.fasta	172687	1	14	32	300	0.00627	0.117	possibly correct	TRUE	02_1.42957.42957.3	SYWLATNAPmPmmPVGEQEIPR	K	Y	0.985	3.28	0.461	2		m10: Oxidation (+15.99), m12: Oxidation (+15.99), m13: Oxidation (+15.99)	856.405	2566.19	2566.18	3	1.023	7.918	7148.05	254203	347221	1618	1639	TRUE
02_1	Uncategorized Sample	BioSample 1	02_1	g.16607 ORF g.16607 m.16607 type:complete len:1767 (+) comp255740_c0_seq2:320-5620(+)	m.16607	atrina_contam.fasta	172687	1	14	32	300	0.00627	0.117	possibly correct	TRUE	02_1.45121.45121.2	SYWLATNAPmPMmPVGEQEIPR	K	Y	0.986	2.57	0.522	2		m10: Oxidation (+15.99), m13: Oxidation (+15.99)	1276.1	2550.18	2550.18	2	1.001	-0.698	7469.91	79827.6	74198	1618	1639	TRUE
02_1	Uncategorized Sample	BioSample 1	02_1	g.16607 ORF g.16607 m.16607 type:complete len:1767 (+) comp255740_c0_seq2:320-5620(+)	m.16607	atrina_contam.fasta	172687	1	14	32	300	0.00627	0.117	possibly correct	TRUE	02_1.39191.39191.2	SYWLATNAPmPmmPVGEQEIPR	K	Y	0.987	2.68	0.51	2		m10: Oxidation (+15.99), m12: Oxidation (+15.99), m13: Oxidation (+15.99)	1284.1	2566.18	2566.18	2	1.006	1.287	6602.44	185555	203750	1618	1639	TRUE
02_1	Uncategorized Sample	BioSample 1	02_1	g.16607 ORF g.16607 m.16607 type:complete len:1767 (+) comp255740_c0_seq2:320-5620(+)	m.16607	atrina_contam.fasta	172687	1	14	32	300	0.00627	0.117	possibly correct	TRUE	02_1.41204.41204.3	SYWLATNAPmPmmPVGEQEIPR	K	Y	0.988	2.86	0.36	2		m10: Oxidation (+15.99), m12: Oxidation (+15.99), m13: Oxidation (+15.99)	856.063	2565.17	2566.18	3	-0.002047	-0.7977	6891.19	367917	756739	1618	1639	TRUE
02_1	Uncategorized Sample	BioSample 1	02_1	g.16607 ORF g.16607 m.16607 type:complete len:1767 (+) comp255740_c0_seq2:320-5620(+)	m.16607	atrina_contam.fasta	172687	1	14	32	300	0.00627	0.117	possibly correct	TRUE	02_1.44814.44814.2	SYWLATNAPmPmMPVGEQEIPR	K	Y	0.989	2.31	0.477	2		m10: Oxidation (+15.99), m12: Oxidation (+15.99)	1275.6	2549.18	2550.18	2	0.000471	0.1847	7420.85	94645.2	105896	1618	1639	TRUE
02_1	Uncategorized Sample	BioSample 1	02_1	g.16607 ORF g.16607 m.16607 type:complete len:1767 (+) comp255740_c0_seq2:320-5620(+)	m.16607	atrina_contam.fasta	172687	1	14	32	300	0.00627	0.117	possibly correct	TRUE	02_1.38544.38544.2	SYWLATNAPMPMMPVGEQEIPR	K	Y	0.991	2.86	0.606	2			1260.09	2518.17	2518.19	2	0.9867	-6.347	6509.73	213703	285581	1618	1639	TRUE
02_1	Uncategorized Sample	BioSample 1	02_1	g.16607 ORF g.16607 m.16607 type:complete len:1767 (+) comp255740_c0_seq2:320-5620(+)	m.16607	atrina_contam.fasta	172687	1	14	32	300	0.00627	0.117	possibly correct	TRUE	02_1.47852.47852.3	SYWLATNAPmPmMPVGEQEIPR	K	Y	0.991	2.21	0.533	2		m10: Oxidation (+15.99), m12: Oxidation (+15.99)	850.733	2549.18	2550.18	3	0.002717	1.065	7929.42	72673.9	85466	1618	1639	TRUE
02_1	Uncategorized Sample	BioSample 1	02_1	g.16607 ORF g.16607 m.16607 type:complete len:1767 (+) comp255740_c0_seq2:320-5620(+)	m.16607	atrina_contam.fasta	172687	1	14	32	300	0.00627	0.117	possibly correct	TRUE	02_1.46674.46674.2	SYWLATNAPmPmMPVGEQEIPR	K	Y	0.991	2.87	0.512	2		m10: Oxidation (+15.99), m12: Oxidation (+15.99)	1276.1	2550.18	2550.18	2	1.005	0.8699	7725.55	131224	138481	1618	1639	TRUE
02_1	Uncategorized Sample	BioSample 1	02_1	g.16607 ORF g.16607 m.16607 type:complete len:1767 (+) comp255740_c0_seq2:320-5620(+)	m.16607	atrina_contam.fasta	172687	1	14	32	300	0.00627	0.117	possibly correct	TRUE	02_1.45138.45138.3	SYWLATNAPmPMmPVGEQEIPR	K	Y	0.992	1.77	0.522	2		m10: Oxidation (+15.99), m13: Oxidation (+15.99)	850.733	2549.18	2550.18	3	0.000558	0.2188	7472.48	122371	52161	1618	1639	TRUE
02_1	Uncategorized Sample	BioSample 1	02_1	g.16607 ORF g.16607 m.16607 type:complete len:1767 (+) comp255740_c0_seq2:320-5620(+)	m.16607	atrina_contam.fasta	172687	1	14	32	300	0.00627	0.117	possibly correct	TRUE	02_1.42594.42594.3	SYWLATNAPMPmmPVGEQEIPR	K	Y	0.992	2.78	0.446	2		m12: Oxidation (+15.99), m13: Oxidation (+15.99)	851.066	2550.18	2550.18	3	1.002	-0.3362	7094.74	98574.5	171229	1618	1639	TRUE
02_1	Uncategorized Sample	BioSample 1	02_1	g.16607 ORF g.16607 m.16607 type:complete len:1767 (+) comp255740_c0_seq2:320-5620(+)	m.16607	atrina_contam.fasta	172687	1	14	32	300	0.00627	0.117	possibly correct	TRUE	02_1.42670.42670.3	SYWLATNAPmPmmPVGEQEIPR	K	Y	0.992	2.78	0.397	2		m10: Oxidation (+15.99), m12: Oxidation (+15.99), m13: Oxidation (+15.99)	856.064	2565.17	2566.18	3	0.00099	0.3858	7105.4	252954	250618	1618	1639	TRUE
02_1	Uncategorized Sample	BioSample 1	02_1	g.16607 ORF g.16607 m.16607 type:complete len:1767 (+) comp255740_c0_seq2:320-5620(+)	m.16607	atrina_contam.fasta	172687	1	14	32	300	0.00627	0.117	possibly correct	TRUE	02_1.47064.47064.2	SYWLATNAPmPMmPVGEQEIPR	K	Y	0.992	2.1	0.651	2		m10: Oxidation (+15.99), m13: Oxidation (+15.99)	1275.6	2549.18	2550.18	2	0.003914	1.535	7789.55	80085.8	98730	1618	1639	TRUE
02_1	Uncategorized Sample	BioSample 1	02_1	g.16607 ORF g.16607 m.16607 type:complete len:1767 (+) comp255740_c0_seq2:320-5620(+)	m.16607	atrina_contam.fasta	172687	1	14	32	300	0.00627	0.117	possibly correct	TRUE	02_1.47502.47502.3	SYWLATNAPmPmMPVGEQEIPR	K	Y	0.993	2.64	0.524	2		m10: Oxidation (+15.99), m12: Oxidation (+15.99)	850.734	2549.18	2550.18	3	0.005351	2.098	7866	111315	178377	1618	1639	TRUE
02_1	Uncategorized Sample	BioSample 1	02_1	g.16607 ORF g.16607 m.16607 type:complete len:1767 (+) comp255740_c0_seq2:320-5620(+)	m.16607	atrina_contam.fasta	172687	1	14	32	300	0.00627	0.117	possibly correct	TRUE	02_1.44871.44871.3	SYWLATNAPmPmMPVGEQEIPR	K	Y	0.993	2.85	0.516	2		m10: Oxidation (+15.99), m12: Oxidation (+15.99)	850.73	2549.17	2550.18	3	-0.006823	-2.676	7430.31	132316	292732	1618	1639	TRUE
02_1	Uncategorized Sample	BioSample 1	02_1	g.16607 ORF g.16607 m.16607 type:complete len:1767 (+) comp255740_c0_seq2:320-5620(+)	m.16607	atrina_contam.fasta	172687	1	14	32	300	0.00627	0.117	possibly correct	TRUE	02_1.46647.46647.3	SYWLATNAPmPmMPVGEQEIPR	K	Y	0.995	2.69	0.456	2		m10: Oxidation (+15.99), m12: Oxidation (+15.99)	850.733	2549.18	2550.18	3	0.00076	0.298	7721.71	213916	212756	1618	1639	TRUE
02_1	Uncategorized Sample	BioSample 1	02_1	g.16607 ORF g.16607 m.16607 type:complete len:1767 (+) comp255740_c0_seq2:320-5620(+)	m.16607	atrina_contam.fasta	172687	1	14	32	300	0.00627	0.117	possibly correct	TRUE	02_1.39478.39478.3	SYWLATNAPmPmmPVGEQEIPR	K	Y	0.995	2.78	0.497	2		m10: Oxidation (+15.99), m12: Oxidation (+15.99), m13: Oxidation (+15.99)	856.4	2566.18	2566.18	3	1.007	1.841	6643.74	162128	235193	1618	1639	TRUE
02_1	Uncategorized Sample	BioSample 1	02_1	g.16607 ORF g.16607 m.16607 type:complete len:1767 (+) comp255740_c0_seq2:320-5620(+)	m.16607	atrina_contam.fasta	172687	1	14	32	300	0.00627	0.117	possibly correct	TRUE	02_1.47711.47711.3	SYWLATNAPMPMmPVGEQEIPR	K	Y	0.996	2.45	0.517	2		m13: Oxidation (+15.99)	845.401	2533.18	2534.19	3	0.001817	0.717	7902.2	208874	151584	1618	1639	TRUE
02_1	Uncategorized Sample	BioSample 1	02_1	g.16607 ORF g.16607 m.16607 type:complete len:1767 (+) comp255740_c0_seq2:320-5620(+)	m.16607	atrina_contam.fasta	172687	1	14	32	300	0.00627	0.117	possibly correct	TRUE	02_1.47955.47955.3	SYWLATNAPmPMmPVGEQEIPR	K	Y	0.996	2.37	0.61	2		m10: Oxidation (+15.99), m13: Oxidation (+15.99)	851.068	2550.18	2550.18	3	1.007	1.78	7950.03	78159.2	92564	1618	1639	TRUE
02_1	Uncategorized Sample	BioSample 1	02_1	g.16607 ORF g.16607 m.16607 type:complete len:1767 (+) comp255740_c0_seq2:320-5620(+)	m.16607	atrina_contam.fasta	172687	1	14	32	300	0.00627	0.117	possibly correct	TRUE	02_1.42525.42525.3	SYWLATNAPmPmmPVGEQEIPR	K	Y	0.996	2.76	0.445	2		m10: Oxidation (+15.99), m12: Oxidation (+15.99), m13: Oxidation (+15.99)	856.398	2566.17	2566.18	3	1.003	0.08855	7084.46	171200	303654	1618	1639	TRUE
02_1	Uncategorized Sample	BioSample 1	02_1	g.16607 ORF g.16607 m.16607 type:complete len:1767 (+) comp255740_c0_seq2:320-5620(+)	m.16607	atrina_contam.fasta	172687	1	14	32	300	0.00627	0.117	possibly correct	TRUE	02_1.47260.47260.3	SYWLATNAPmPmMPVGEQEIPR	K	Y	0.996	2.51	0.545	2		m10: Oxidation (+15.99), m12: Oxidation (+15.99)	850.734	2549.18	2550.18	3	0.003457	1.356	7824.62	168230	200124	1618	1639	TRUE
02_1	Uncategorized Sample	BioSample 1	02_1	g.16607 ORF g.16607 m.16607 type:complete len:1767 (+) comp255740_c0_seq2:320-5620(+)	m.16607	atrina_contam.fasta	172687	1	14	32	300	0.00627	0.117	possibly correct	TRUE	02_1.47254.47254.2	SYWLATNAPMPMmPVGEQEIPR	K	Y	0.997	2.98	0.56	2		m13: Oxidation (+15.99)	1267.6	2533.19	2534.19	2	0.00451	1.78	7823.68	102715	111787	1618	1639	TRUE
02_1	Uncategorized Sample	BioSample 1	02_1	g.16607 ORF g.16607 m.16607 type:complete len:1767 (+) comp255740_c0_seq2:320-5620(+)	m.16607	atrina_contam.fasta	172687	1	14	32	300	0.00627	0.117	possibly correct	TRUE	02_1.47139.47139.3	SYWLATNAPmPMmPVGEQEIPR	K	Y	0.997	2.47	0.619	2		m10: Oxidation (+15.99), m13: Oxidation (+15.99)	850.732	2549.17	2550.18	3	-0.002219	-0.8701	7803.97	123739	171685	1618	1639	TRUE
02_1	Uncategorized Sample	BioSample 1	02_1	g.16607 ORF g.16607 m.16607 type:complete len:1767 (+) comp255740_c0_seq2:320-5620(+)	m.16607	atrina_contam.fasta	172687	1	14	32	300	0.00627	0.117	possibly correct	TRUE	02_1.41263.41263.2	SYWLATNAPmPmmPVGEQEIPR	K	Y	0.997	2.65	0.559	2		m10: Oxidation (+15.99), m12: Oxidation (+15.99), m13: Oxidation (+15.99)	1283.59	2565.17	2566.18	2	0.001551	0.6044	6899.68	200710	301655	1618	1639	TRUE
02_1	Uncategorized Sample	BioSample 1	02_1	g.16607 ORF g.16607 m.16607 type:complete len:1767 (+) comp255740_c0_seq2:320-5620(+)	m.16607	atrina_contam.fasta	172687	1	14	32	300	0.00627	0.117	possibly correct	TRUE	02_1.46523.46523.3	SYWLATNAPmPMmPVGEQEIPR	K	Y	0.997	2.6	0.532	2		m10: Oxidation (+15.99), m13: Oxidation (+15.99)	850.733	2549.18	2550.18	3	0.000717	0.2811	7701.2	245524	184124	1618	1639	TRUE
02_1	Uncategorized Sample	BioSample 1	02_1	g.16607 ORF g.16607 m.16607 type:complete len:1767 (+) comp255740_c0_seq2:320-5620(+)	m.16607	atrina_contam.fasta	172687	1	14	32	300	0.00627	0.117	possibly correct	TRUE	02_1.46910.46910.3	SYWLATNAPmPmMPVGEQEIPR	K	Y	0.997	2.45	0.6	2		m10: Oxidation (+15.99), m12: Oxidation (+15.99)	850.733	2549.18	2550.18	3	0.002268	0.8893	7762.77	168472	171614	1618	1639	TRUE
02_1	Uncategorized Sample	BioSample 1	02_1	g.16607 ORF g.16607 m.16607 type:complete len:1767 (+) comp255740_c0_seq2:320-5620(+)	m.16607	atrina_contam.fasta	172687	1	14	32	300	0.00627	0.117	possibly correct	TRUE	02_1.48467.48467.3	SYWLATNAPMPmMPVGEQEIPR	K	Y	0.997	3.11	0.553	2		m12: Oxidation (+15.99)	845.733	2534.18	2534.19	3	0.9969	-2.305	8030.49	164760	284983	1618	1639	TRUE
02_1	Uncategorized Sample	BioSample 1	02_1	g.16607 ORF g.16607 m.16607 type:complete len:1767 (+) comp255740_c0_seq2:320-5620(+)	m.16607	atrina_contam.fasta	172687	1	14	32	300	0.00627	0.117	possibly correct	TRUE	02_1.39632.39632.3	SYWLATNAPmPmmPVGEQEIPR	K	Y	0.997	2.93	0.465	2		m10: Oxidation (+15.99), m12: Oxidation (+15.99), m13: Oxidation (+15.99)	856.399	2566.18	2566.18	3	1.005	1.023	6665.74	176683	405016	1618	1639	TRUE
02_1	Uncategorized Sample	BioSample 1	02_1	g.16607 ORF g.16607 m.16607 type:complete len:1767 (+) comp255740_c0_seq2:320-5620(+)	m.16607	atrina_contam.fasta	172687	1	14	32	300	0.00627	0.117	possibly correct	TRUE	02_1.48598.48598.3	SYWLATNAPMPmMPVGEQEIPR	K	Y	0.997	3.05	0.496	2		m12: Oxidation (+15.99)	845.4	2533.18	2534.19	3	-0.001758	-0.6937	8052.48	107051	153808	1618	1639	TRUE
02_1	Uncategorized Sample	BioSample 1	02_1	g.16607 ORF g.16607 m.16607 type:complete len:1767 (+) comp255740_c0_seq2:320-5620(+)	m.16607	atrina_contam.fasta	172687	1	14	32	300	0.00627	0.117	possibly correct	TRUE	02_1.46384.46384.3	SYWLATNAPmPMmPVGEQEIPR	K	Y	0.997	2.66	0.643	2		m10: Oxidation (+15.99), m13: Oxidation (+15.99)	850.733	2549.18	2550.18	3	0.003054	1.198	7679.71	327893	177992	1618	1639	TRUE
02_1	Uncategorized Sample	BioSample 1	02_1	g.16607 ORF g.16607 m.16607 type:complete len:1767 (+) comp255740_c0_seq2:320-5620(+)	m.16607	atrina_contam.fasta	172687	1	14	32	300	0.00627	0.117	possibly correct	TRUE	02_1.45757.45757.2	SYWLATNAPmPMmPVGEQEIPR	K	Y	0.997	2.8	0.638	2		m10: Oxidation (+15.99), m13: Oxidation (+15.99)	1275.59	2549.17	2550.18	2	-0.003473	-1.362	7570.71	98481.5	106530	1618	1639	TRUE
02_1	Uncategorized Sample	BioSample 1	02_1	g.16607 ORF g.16607 m.16607 type:complete len:1767 (+) comp255740_c0_seq2:320-5620(+)	m.16607	atrina_contam.fasta	172687	1	14	32	300	0.00627	0.117	possibly correct	TRUE	02_1.47923.47923.3	SYWLATNAPmPMMPVGEQEIPR	K	Y	0.997	2.32	0.599	2		m10: Oxidation (+15.99)	845.401	2533.18	2534.19	3	0.000662	0.2612	7943.74	149927	98054	1618	1639	TRUE
02_1	Uncategorized Sample	BioSample 1	02_1	g.16607 ORF g.16607 m.16607 type:complete len:1767 (+) comp255740_c0_seq2:320-5620(+)	m.16607	atrina_contam.fasta	172687	1	14	32	300	0.00627	0.117	possibly correct	TRUE	02_1.42081.42081.3	SYWLATNAPmPmmPVGEQEIPR	K	Y	0.997	3	0.551	2		m10: Oxidation (+15.99), m12: Oxidation (+15.99), m13: Oxidation (+15.99)	856.063	2565.17	2566.18	3	-0.002121	-0.8265	7018.89	146234	227557	1618	1639	TRUE
02_1	Uncategorized Sample	BioSample 1	02_1	g.16607 ORF g.16607 m.16607 type:complete len:1767 (+) comp255740_c0_seq2:320-5620(+)	m.16607	atrina_contam.fasta	172687	1	14	32	300	0.00627	0.117	possibly correct	TRUE	02_1.41947.41947.3	SYWLATNAPmPmmPVGEQEIPR	K	Y	0.997	2.78	0.534	2		m10: Oxidation (+15.99), m12: Oxidation (+15.99), m13: Oxidation (+15.99)	856.065	2565.17	2566.18	3	0.002138	0.8331	6998.18	160837	327684	1618	1639	TRUE
02_1	Uncategorized Sample	BioSample 1	02_1	g.16607 ORF g.16607 m.16607 type:complete len:1767 (+) comp255740_c0_seq2:320-5620(+)	m.16607	atrina_contam.fasta	172687	1	14	32	300	0.00627	0.117	possibly correct	TRUE	02_1.44575.44575.3	SYWLATNAPmPMmPVGEQEIPR	K	Y	0.997	3.05	0.515	2		m10: Oxidation (+15.99), m13: Oxidation (+15.99)	850.732	2549.17	2550.18	3	-0.001023	-0.4012	7381.01	279991	300055	1618	1639	TRUE
02_1	Uncategorized Sample	BioSample 1	02_1	g.16607 ORF g.16607 m.16607 type:complete len:1767 (+) comp255740_c0_seq2:320-5620(+)	m.16607	atrina_contam.fasta	172687	1	14	32	300	0.00627	0.117	possibly correct	TRUE	02_1.41460.41460.3	SYWLATNAPMPmmPVGEQEIPR	K	Y	0.997	2.72	0.594	2		m12: Oxidation (+15.99), m13: Oxidation (+15.99)	850.733	2549.18	2550.18	3	0.001589	0.6231	6927.67	244850	309752	1618	1639	TRUE
02_1	Uncategorized Sample	BioSample 1	02_1	g.16607 ORF g.16607 m.16607 type:complete len:1767 (+) comp255740_c0_seq2:320-5620(+)	m.16607	atrina_contam.fasta	172687	1	14	32	300	0.00627	0.117	possibly correct	TRUE	02_1.48041.48041.3	SYWLATNAPMPmMPVGEQEIPR	K	Y	0.997	2.92	0.568	2		m12: Oxidation (+15.99)	845.401	2533.18	2534.19	3	-0.000393	-0.1551	7965.02	257249	217674	1618	1639	TRUE
02_1	Uncategorized Sample	BioSample 1	02_1	g.16607 ORF g.16607 m.16607 type:complete len:1767 (+) comp255740_c0_seq2:320-5620(+)	m.16607	atrina_contam.fasta	172687	1	14	32	300	0.00627	0.117	possibly correct	TRUE	02_1.47941.47941.2	SYWLATNAPmPMMPVGEQEIPR	K	Y	0.997	3.07	0.584	2		m10: Oxidation (+15.99)	1267.6	2533.18	2534.19	2	0.002217	0.8748	7947.31	118846	222822	1618	1639	TRUE
02_1	Uncategorized Sample	BioSample 1	02_1	g.16607 ORF g.16607 m.16607 type:complete len:1767 (+) comp255740_c0_seq2:320-5620(+)	m.16607	atrina_contam.fasta	172687	1	14	32	300	0.00627	0.117	possibly correct	TRUE	02_1.43939.43939.3	SYWLATNAPmPMmPVGEQEIPR	K	Y	0.997	3.47	0.46	2		m10: Oxidation (+15.99), m13: Oxidation (+15.99)	851.066	2550.18	2550.18	3	1.001	-0.689	7289.24	343500	604592	1618	1639	TRUE
02_1	Uncategorized Sample	BioSample 1	02_1	g.16607 ORF g.16607 m.16607 type:complete len:1767 (+) comp255740_c0_seq2:320-5620(+)	m.16607	atrina_contam.fasta	172687	1	14	32	300	0.00627	0.117	possibly correct	TRUE	02_1.47818.47818.3	SYWLATNAPmPMMPVGEQEIPR	K	Y	0.997	3.05	0.571	2		m10: Oxidation (+15.99)	845.401	2533.18	2534.19	3	-0.000344	-0.1357	7922.86	203820	142434	1618	1639	TRUE
02_1	Uncategorized Sample	BioSample 1	02_1	g.16607 ORF g.16607 m.16607 type:complete len:1767 (+) comp255740_c0_seq2:320-5620(+)	m.16607	atrina_contam.fasta	172687	1	14	32	300	0.00627	0.117	possibly correct	TRUE	02_1.42824.42824.2	SYWLATNAPmPmmPVGEQEIPR	K	Y	0.997	2.4	0.725	2		m10: Oxidation (+15.99), m12: Oxidation (+15.99), m13: Oxidation (+15.99)	1284.09	2566.17	2566.18	2	1.004	0.4302	7127.94	117695	73613	1618	1639	TRUE
02_1	Uncategorized Sample	BioSample 1	02_1	g.16607 ORF g.16607 m.16607 type:complete len:1767 (+) comp255740_c0_seq2:320-5620(+)	m.16607	atrina_contam.fasta	172687	1	14	32	300	0.00627	0.117	possibly correct	TRUE	02_1.47476.47476.3	SYWLATNAPmPMMPVGEQEIPR	K	Y	0.997	2.84	0.645	2		m10: Oxidation (+15.99)	845.401	2533.18	2534.19	3	-0.000113	-0.04459	7861.07	307876	231382	1618	1639	TRUE
02_1	Uncategorized Sample	BioSample 1	02_1	g.16607 ORF g.16607 m.16607 type:complete len:1767 (+) comp255740_c0_seq2:320-5620(+)	m.16607	atrina_contam.fasta	172687	1	14	32	300	0.00627	0.117	possibly correct	TRUE	02_1.43633.43633.3	SYWLATNAPmPMmPVGEQEIPR	K	Y	0.997	3.27	0.489	2		m10: Oxidation (+15.99), m13: Oxidation (+15.99)	850.732	2549.17	2550.18	3	-0.000594	-0.2329	7246.07	518593	549428	1618	1639	TRUE
02_1	Uncategorized Sample	BioSample 1	02_1	g.16607 ORF g.16607 m.16607 type:complete len:1767 (+) comp255740_c0_seq2:320-5620(+)	m.16607	atrina_contam.fasta	172687	1	14	32	300	0.00627	0.117	possibly correct	TRUE	02_1.41164.41164.3	SYWLATNAPMPmmPVGEQEIPR	K	Y	0.997	3.16	0.605	2		m12: Oxidation (+15.99), m13: Oxidation (+15.99)	850.731	2549.17	2550.18	3	-0.00321	-1.259	6885.15	110579	278480	1618	1639	TRUE
02_1	Uncategorized Sample	BioSample 1	02_1	g.16607 ORF g.16607 m.16607 type:complete len:1767 (+) comp255740_c0_seq2:320-5620(+)	m.16607	atrina_contam.fasta	172687	1	14	32	300	0.00627	0.117	possibly correct	TRUE	02_1.46020.46020.2	SYWLATNAPMPMmPVGEQEIPR	K	Y	0.997	3.01	0.647	2		m13: Oxidation (+15.99)	1268.1	2534.18	2534.19	2	1.001	-0.4992	7614.51	101727	140862	1618	1639	TRUE
02_1	Uncategorized Sample	BioSample 1	02_1	g.16607 ORF g.16607 m.16607 type:complete len:1767 (+) comp255740_c0_seq2:320-5620(+)	m.16607	atrina_contam.fasta	172687	1	14	32	300	0.00627	0.117	possibly correct	TRUE	02_1.44701.44701.2	SYWLATNAPmPMmPVGEQEIPR	K	Y	0.997	3.09	0.597	2		m10: Oxidation (+15.99), m13: Oxidation (+15.99)	1275.59	2549.18	2550.18	2	-0.000417	-0.1635	7400.2	134530	162937	1618	1639	TRUE
02_1	Uncategorized Sample	BioSample 1	02_1	g.16607 ORF g.16607 m.16607 type:complete len:1767 (+) comp255740_c0_seq2:320-5620(+)	m.16607	atrina_contam.fasta	172687	1	14	32	300	0.00627	0.117	possibly correct	TRUE	02_1.44701.44701.2	SYWLATNAPmPmMPVGEQEIPR	K	Y	0.997	3.09	0.597	2		m10: Oxidation (+15.99), m12: Oxidation (+15.99)	1275.59	2549.18	2550.18	2	-0.000417	-0.1635	7400.2	134530	162937	1618	1639	TRUE
02_1	Uncategorized Sample	BioSample 1	02_1	g.16607 ORF g.16607 m.16607 type:complete len:1767 (+) comp255740_c0_seq2:320-5620(+)	m.16607	atrina_contam.fasta	172687	1	14	32	300	0.00627	0.117	possibly correct	TRUE	02_1.44708.44708.3	SYWLATNAPmPmMPVGEQEIPR	K	Y	0.997	3.28	0.528	2		m10: Oxidation (+15.99), m12: Oxidation (+15.99)	850.732	2549.17	2550.18	3	-0.000645	-0.2529	7401.42	168695	522543	1618	1639	TRUE
02_1	Uncategorized Sample	BioSample 1	02_1	g.16607 ORF g.16607 m.16607 type:complete len:1767 (+) comp255740_c0_seq2:320-5620(+)	m.16607	atrina_contam.fasta	172687	1	14	32	300	0.00627	0.117	possibly correct	TRUE	02_1.41718.41718.2	SYWLATNAPmPmmPVGEQEIPR	K	Y	0.997	2.87	0.68	2		m10: Oxidation (+15.99), m12: Oxidation (+15.99), m13: Oxidation (+15.99)	1283.59	2565.17	2566.18	2	0.002874	1.12	6964.58	139948	140179	1618	1639	TRUE
02_1	Uncategorized Sample	BioSample 1	02_1	g.16607 ORF g.16607 m.16607 type:complete len:1767 (+) comp255740_c0_seq2:320-5620(+)	m.16607	atrina_contam.fasta	172687	1	14	32	300	0.00627	0.117	possibly correct	TRUE	02_1.46407.46407.2	SYWLATNAPmPMmPVGEQEIPR	K	Y	0.997	3.17	0.623	2		m10: Oxidation (+15.99), m13: Oxidation (+15.99)	1276.1	2550.18	2550.18	2	1.001	-0.6196	7683.21	168537	235420	1618	1639	TRUE
02_1	Uncategorized Sample	BioSample 1	02_1	g.16607 ORF g.16607 m.16607 type:complete len:1767 (+) comp255740_c0_seq2:320-5620(+)	m.16607	atrina_contam.fasta	172687	1	14	32	300	0.00627	0.117	possibly correct	TRUE	02_1.46781.46781.3	SYWLATNAPmPmMPVGEQEIPR	K	Y	0.997	3.47	0.567	2		m10: Oxidation (+15.99), m12: Oxidation (+15.99)	850.734	2549.18	2550.18	3	0.005916	2.32	7742.34	238820	345445	1618	1639	TRUE
02_1	Uncategorized Sample	BioSample 1	02_1	g.16607 ORF g.16607 m.16607 type:complete len:1767 (+) comp255740_c0_seq2:320-5620(+)	m.16607	atrina_contam.fasta	172687	1	14	32	300	0.00627	0.117	possibly correct	TRUE	02_1.41506.41506.3	SYWLATNAPmPmmPVGEQEIPR	K	Y	0.997	3.42	0.558	2		m10: Oxidation (+15.99), m12: Oxidation (+15.99), m13: Oxidation (+15.99)	856.4	2566.18	2566.18	3	1.007	1.725	6934.19	270659	721525	1618	1639	TRUE
02_1	Uncategorized Sample	BioSample 1	02_1	g.16607 ORF g.16607 m.16607 type:complete len:1767 (+) comp255740_c0_seq2:320-5620(+)	m.16607	atrina_contam.fasta	172687	1	14	32	300	0.00627	0.117	possibly correct	TRUE	02_1.48314.48314.3	SYWLATNAPMPmMPVGEQEIPR	K	Y	0.997	3.1	0.638	2		m12: Oxidation (+15.99)	845.401	2533.18	2534.19	3	0.000567	0.2237	8008.09	257112	271347	1618	1639	TRUE
02_1	Uncategorized Sample	BioSample 1	02_1	g.16607 ORF g.16607 m.16607 type:complete len:1767 (+) comp255740_c0_seq2:320-5620(+)	m.16607	atrina_contam.fasta	172687	1	14	32	300	0.00627	0.117	possibly correct	TRUE	02_1.36912.36912.3	SYWLATNAPmPmmPVGEQEIPR	K	Y	0.997	2.86	0.508	2		m10: Oxidation (+15.99), m12: Oxidation (+15.99), m13: Oxidation (+15.99)	856.064	2565.17	2566.18	3	0.000653	0.2545	6281.58	484226	856152	1618	1639	TRUE
02_1	Uncategorized Sample	BioSample 1	02_1	g.16607 ORF g.16607 m.16607 type:complete len:1767 (+) comp255740_c0_seq2:320-5620(+)	m.16607	atrina_contam.fasta	172687	1	14	32	300	0.00627	0.117	possibly correct	TRUE	02_1.42215.42215.3	SYWLATNAPmPmmPVGEQEIPR	K	Y	0.997	3.3	0.548	2		m10: Oxidation (+15.99), m12: Oxidation (+15.99), m13: Oxidation (+15.99)	856.065	2565.17	2566.18	3	0.003143	1.225	7039.38	165056	309628	1618	1639	TRUE
02_1	Uncategorized Sample	BioSample 1	02_1	g.16607 ORF g.16607 m.16607 type:complete len:1767 (+) comp255740_c0_seq2:320-5620(+)	m.16607	atrina_contam.fasta	172687	1	14	32	300	0.00627	0.117	possibly correct	TRUE	02_1.47357.47357.3	SYWLATNAPMPmMPVGEQEIPR	K	Y	0.997	3.14	0.631	2		m12: Oxidation (+15.99)	845.401	2533.18	2534.19	3	-0.000817	-0.3224	7840.72	211463	252719	1618	1639	TRUE
02_1	Uncategorized Sample	BioSample 1	02_1	g.16607 ORF g.16607 m.16607 type:complete len:1767 (+) comp255740_c0_seq2:320-5620(+)	m.16607	atrina_contam.fasta	172687	1	14	32	300	0.00627	0.117	possibly correct	TRUE	02_1.46183.46183.2	SYWLATNAPmPMmPVGEQEIPR	K	Y	0.997	3.51	0.532	2		m10: Oxidation (+15.99), m13: Oxidation (+15.99)	1275.59	2549.17	2550.18	2	-0.000864	-0.3388	7642.47	202142	323077	1618	1639	TRUE
02_1	Uncategorized Sample	BioSample 1	02_1	g.16607 ORF g.16607 m.16607 type:complete len:1767 (+) comp255740_c0_seq2:320-5620(+)	m.16607	atrina_contam.fasta	172687	1	14	32	300	0.00627	0.117	possibly correct	TRUE	02_1.44284.44284.3	SYWLATNAPmPMmPVGEQEIPR	K	Y	0.997	3.45	0.585	2		m10: Oxidation (+15.99), m13: Oxidation (+15.99)	850.732	2549.17	2550.18	3	-0.001565	-0.6137	7338.15	344901	343078	1618	1639	TRUE
02_1	Uncategorized Sample	BioSample 1	02_1	g.16607 ORF g.16607 m.16607 type:complete len:1767 (+) comp255740_c0_seq2:320-5620(+)	m.16607	atrina_contam.fasta	172687	1	14	32	300	0.00627	0.117	possibly correct	TRUE	02_1.45733.45733.3	SYWLATNAPmPMmPVGEQEIPR	K	Y	0.997	3.28	0.571	2		m10: Oxidation (+15.99), m13: Oxidation (+15.99)	850.733	2549.18	2550.18	3	0.00173	0.6784	7566.94	206431	369589	1618	1639	TRUE
02_1	Uncategorized Sample	BioSample 1	02_1	g.16607 ORF g.16607 m.16607 type:complete len:1767 (+) comp255740_c0_seq2:320-5620(+)	m.16607	atrina_contam.fasta	172687	1	14	32	300	0.00627	0.117	possibly correct	TRUE	02_1.47838.47838.2	SYWLATNAPmPMMPVGEQEIPR	K	Y	0.997	3.38	0.591	2		m10: Oxidation (+15.99)	1268.1	2534.18	2534.19	2	1.002	-0.4203	7926.66	162744	277134	1618	1639	TRUE
02_1	Uncategorized Sample	BioSample 1	02_1	g.16607 ORF g.16607 m.16607 type:complete len:1767 (+) comp255740_c0_seq2:320-5620(+)	m.16607	atrina_contam.fasta	172687	1	14	32	300	0.00627	0.117	possibly correct	TRUE	02_1.44132.44132.3	SYWLATNAPMPmmPVGEQEIPR	K	Y	0.997	3.4	0.616	2		m12: Oxidation (+15.99), m13: Oxidation (+15.99)	850.733	2549.18	2550.18	3	0.002571	1.008	7316.58	217778	210030	1618	1639	TRUE
02_1	Uncategorized Sample	BioSample 1	02_1	g.16607 ORF g.16607 m.16607 type:complete len:1767 (+) comp255740_c0_seq2:320-5620(+)	m.16607	atrina_contam.fasta	172687	1	14	32	300	0.00627	0.117	possibly correct	TRUE	02_1.45860.45860.3	SYWLATNAPMPmmPVGEQEIPR	K	Y	0.997	3.18	0.611	2		m12: Oxidation (+15.99), m13: Oxidation (+15.99)	850.733	2549.18	2550.18	3	0.000818	0.3208	7587.66	251085	447315	1618	1639	TRUE
02_1	Uncategorized Sample	BioSample 1	02_1	g.16607 ORF g.16607 m.16607 type:complete len:1767 (+) comp255740_c0_seq2:320-5620(+)	m.16607	atrina_contam.fasta	172687	1	14	32	300	0.00627	0.117	possibly correct	TRUE	02_1.47032.47032.3	SYWLATNAPmPmMPVGEQEIPR	K	Y	0.997	3.21	0.643	2		m10: Oxidation (+15.99), m12: Oxidation (+15.99)	850.733	2549.18	2550.18	3	0.001426	0.5592	7783.39	161538	211036	1618	1639	TRUE
02_1	Uncategorized Sample	BioSample 1	02_1	g.16607 ORF g.16607 m.16607 type:complete len:1767 (+) comp255740_c0_seq2:320-5620(+)	m.16607	atrina_contam.fasta	172687	1	14	32	300	0.00627	0.117	possibly correct	TRUE	02_1.48475.48475.2	SYWLATNAPMPMmPVGEQEIPR	K	Y	0.997	3.41	0.598	2		m13: Oxidation (+15.99)	1267.6	2533.18	2534.19	2	-0.001129	-0.4455	8031.76	161550	146206	1618	1639	TRUE
02_1	Uncategorized Sample	BioSample 1	02_1	g.16607 ORF g.16607 m.16607 type:complete len:1767 (+) comp255740_c0_seq2:320-5620(+)	m.16607	atrina_contam.fasta	172687	1	14	32	300	0.00627	0.117	possibly correct	TRUE	02_1.43780.43780.3	SYWLATNAPmPMmPVGEQEIPR	K	Y	0.997	3.35	0.585	2		m10: Oxidation (+15.99), m13: Oxidation (+15.99)	850.733	2549.18	2550.18	3	0.000686	0.269	7266.82	504815	445998	1618	1639	TRUE
02_1	Uncategorized Sample	BioSample 1	02_1	g.16607 ORF g.16607 m.16607 type:complete len:1767 (+) comp255740_c0_seq2:320-5620(+)	m.16607	atrina_contam.fasta	172687	1	14	32	300	0.00627	0.117	possibly correct	TRUE	02_1.47596.47596.3	SYWLATNAPmPMMPVGEQEIPR	K	Y	0.997	3.24	0.605	2		m10: Oxidation (+15.99)	845.401	2533.18	2534.19	3	4.199e-05	0.01657	7881.53	483173	402154	1618	1639	TRUE
02_1	Uncategorized Sample	BioSample 1	02_1	g.16607 ORF g.16607 m.16607 type:complete len:1767 (+) comp255740_c0_seq2:320-5620(+)	m.16607	atrina_contam.fasta	172687	1	14	32	300	0.00627	0.117	possibly correct	TRUE	02_1.44566.44566.2	SYWLATNAPmPmMPVGEQEIPR	K	Y	0.997	3.58	0.549	2		m10: Oxidation (+15.99), m12: Oxidation (+15.99)	1275.6	2549.18	2550.18	2	0.000104	0.04077	7379.5	194455	252862	1618	1639	TRUE
02_1	Uncategorized Sample	BioSample 1	02_1	g.16607 ORF g.16607 m.16607 type:complete len:1767 (+) comp255740_c0_seq2:320-5620(+)	m.16607	atrina_contam.fasta	172687	1	14	32	300	0.00627	0.117	possibly correct	TRUE	02_1.47728.47728.2	SYWLATNAPMPMmPVGEQEIPR	K	Y	0.997	3.85	0.592	2		m13: Oxidation (+15.99)	1268.1	2534.18	2534.19	2	1	-0.9726	7905.51	181825	328930	1618	1639	TRUE
02_1	Uncategorized Sample	BioSample 1	02_1	g.16607 ORF g.16607 m.16607 type:complete len:1767 (+) comp255740_c0_seq2:320-5620(+)	m.16607	atrina_contam.fasta	172687	1	14	32	300	0.00627	0.117	possibly correct	TRUE	02_1.44428.44428.2	SYWLATNAPmPMmPVGEQEIPR	K	Y	0.997	3.32	0.643	2		m10: Oxidation (+15.99), m13: Oxidation (+15.99)	1276.1	2550.18	2550.18	2	1.001	-0.8548	7358.52	184318	258683	1618	1639	TRUE
02_1	Uncategorized Sample	BioSample 1	02_1	g.16607 ORF g.16607 m.16607 type:complete len:1767 (+) comp255740_c0_seq2:320-5620(+)	m.16607	atrina_contam.fasta	172687	1	14	32	300	0.00627	0.117	possibly correct	TRUE	02_1.43795.43795.2	SYWLATNAPmPMmPVGEQEIPR	K	Y	0.997	3.49	0.585	2		m10: Oxidation (+15.99), m13: Oxidation (+15.99)	1275.6	2549.18	2550.18	2	0.00319	1.251	7268.91	271453	361118	1618	1639	TRUE
02_1	Uncategorized Sample	BioSample 1	02_1	g.16607 ORF g.16607 m.16607 type:complete len:1767 (+) comp255740_c0_seq2:320-5620(+)	m.16607	atrina_contam.fasta	172687	1	14	32	300	0.00627	0.117	possibly correct	TRUE	02_1.36946.36946.2	SYWLATNAPmPmmPVGEQEIPR	K	Y	0.997	3.65	0.623	2		m10: Oxidation (+15.99), m12: Oxidation (+15.99), m13: Oxidation (+15.99)	1284.09	2566.17	2566.18	2	0.9982	-1.751	6286.31	605175	968145	1618	1639	TRUE
02_1	Uncategorized Sample	BioSample 1	02_1	g.16607 ORF g.16607 m.16607 type:complete len:1767 (+) comp255740_c0_seq2:320-5620(+)	m.16607	atrina_contam.fasta	172687	1	14	32	300	0.00627	0.117	possibly correct	TRUE	02_1.43482.43482.2	SYWLATNAPMPmmPVGEQEIPR	K	Y	0.997	3.58	0.59	2		m12: Oxidation (+15.99), m13: Oxidation (+15.99)	1275.59	2549.18	2550.18	2	-0.000179	-0.0702	7224.38	301635	450995	1618	1639	TRUE
02_1	Uncategorized Sample	BioSample 1	02_1	g.16607 ORF g.16607 m.16607 type:complete len:1767 (+) comp255740_c0_seq2:320-5620(+)	m.16607	atrina_contam.fasta	172687	1	14	32	300	0.00627	0.117	possibly correct	TRUE	02_1.38424.38424.2	SYWLATNAPmPmmPVGEQEIPR	K	Y	0.997	3.6	0.646	2		m10: Oxidation (+15.99), m12: Oxidation (+15.99), m13: Oxidation (+15.99)	1284.1	2566.18	2566.18	2	1.008	1.91	6493	392455	630651	1618	1639	TRUE
02_1	Uncategorized Sample	BioSample 1	02_1	g.16607 ORF g.16607 m.16607 type:complete len:1767 (+) comp255740_c0_seq2:320-5620(+)	m.16607	atrina_contam.fasta	172687	1	14	32	300	0.00627	0.117	possibly correct	TRUE	02_1.45936.45936.2	SYWLATNAPmPMmPVGEQEIPR	K	Y	0.997	3.32	0.674	2		m10: Oxidation (+15.99), m13: Oxidation (+15.99)	1276.1	2550.18	2550.18	2	1.002	-0.3844	7600.93	132788	225269	1618	1639	TRUE
02_1	Uncategorized Sample	BioSample 1	02_1	g.16607 ORF g.16607 m.16607 type:complete len:1767 (+) comp255740_c0_seq2:320-5620(+)	m.16607	atrina_contam.fasta	172687	1	14	32	300	0.00627	0.117	possibly correct	TRUE	02_1.48062.48062.2	SYWLATNAPMPmMPVGEQEIPR	K	Y	0.997	3.61	0.607	2		m12: Oxidation (+15.99)	1267.6	2533.18	2534.19	2	-0.001354	-0.5343	7968.53	220603	353790	1618	1639	TRUE
02_1	Uncategorized Sample	BioSample 1	02_1	g.16607 ORF g.16607 m.16607 type:complete len:1767 (+) comp255740_c0_seq2:320-5620(+)	m.16607	atrina_contam.fasta	172687	1	14	32	300	0.00627	0.117	possibly correct	TRUE	02_1.42819.42819.3	SYWLATNAPmPmmPVGEQEIPR	K	Y	0.997	3.75	0.494	2		m10: Oxidation (+15.99), m12: Oxidation (+15.99), m13: Oxidation (+15.99)	856.406	2566.2	2566.18	3	1.027	9.364	7127.28	284921	724144	1618	1639	TRUE
02_1	Uncategorized Sample	BioSample 1	02_1	g.16607 ORF g.16607 m.16607 type:complete len:1767 (+) comp255740_c0_seq2:320-5620(+)	m.16607	atrina_contam.fasta	172687	1	14	32	300	0.00627	0.117	possibly correct	TRUE	02_1.48332.48332.2	SYWLATNAPMPmMPVGEQEIPR	K	Y	0.997	4.08	0.614	2		m12: Oxidation (+15.99)	1268.1	2534.18	2534.19	2	1.001	-0.657	8010.89	266994	296803	1618	1639	TRUE
02_1	Uncategorized Sample	BioSample 1	02_1	g.16607 ORF g.16607 m.16607 type:complete len:1767 (+) comp255740_c0_seq2:320-5620(+)	m.16607	atrina_contam.fasta	172687	1	14	32	300	0.00627	0.117	possibly correct	TRUE	02_1.48193.48193.2	SYWLATNAPMPmMPVGEQEIPR	K	Y	0.997	3.72	0.622	2		m12: Oxidation (+15.99)	1267.6	2533.18	2534.19	2	0.000873	0.3445	7989.27	340031	476890	1618	1639	TRUE
02_1	Uncategorized Sample	BioSample 1	02_1	g.16607 ORF g.16607 m.16607 type:complete len:1767 (+) comp255740_c0_seq2:320-5620(+)	m.16607	atrina_contam.fasta	172687	1	14	32	300	0.00627	0.117	possibly correct	TRUE	02_1.37101.37101.2	SYWLATNAPmPmmPVGEQEIPR	K	Y	0.997	3.83	0.614	2		m10: Oxidation (+15.99), m12: Oxidation (+15.99), m13: Oxidation (+15.99)	1283.59	2565.17	2566.18	2	0.001245	0.4851	6307.66	906080	1693850	1618	1639	TRUE
02_1	Uncategorized Sample	BioSample 1	02_1	g.16607 ORF g.16607 m.16607 type:complete len:1767 (+) comp255740_c0_seq2:320-5620(+)	m.16607	atrina_contam.fasta	172687	1	14	32	300	0.00627	0.117	possibly correct	TRUE	02_1.43959.43959.2	SYWLATNAPmPmMPVGEQEIPR	K	Y	0.997	3.99	0.65	2		m10: Oxidation (+15.99), m12: Oxidation (+15.99)	1276.1	2550.18	2550.18	2	1.001	-0.8548	7292.06	195483	296099	1618	1639	TRUE
02_1	Uncategorized Sample	BioSample 1	02_1	g.16607 ORF g.16607 m.16607 type:complete len:1767 (+) comp255740_c0_seq2:320-5620(+)	m.16607	atrina_contam.fasta	172687	1	14	32	300	0.00627	0.117	possibly correct	TRUE	02_1.42751.42751.2	SYWLATNAPMPmmPVGEQEIPR	K	Y	0.997	4.26	0.631	2		m12: Oxidation (+15.99), m13: Oxidation (+15.99)	1276.1	2550.18	2550.18	2	1.004	0.4779	7117.44	541788	1089530	1618	1639	TRUE
02_1	Uncategorized Sample	BioSample 1	02_1	g.16607 ORF g.16607 m.16607 type:complete len:1767 (+) comp255740_c0_seq2:320-5620(+)	m.16607	atrina_contam.fasta	172687	1	14	32	300	0.00627	0.117	possibly correct	TRUE	02_1.39000.39000.3	SYWLATNAPmPmmPVGEQEIPR	K	Y	0.997	3.6	0.504	2		m10: Oxidation (+15.99), m12: Oxidation (+15.99), m13: Oxidation (+15.99)	856.064	2565.17	2566.18	3	-0.000693	-0.2701	6575.58	526373	894799	1618	1639	TRUE
02_1	Uncategorized Sample	BioSample 1	02_1	g.16607 ORF g.16607 m.16607 type:complete len:1767 (+) comp255740_c0_seq2:320-5620(+)	m.16607	atrina_contam.fasta	172687	1	14	32	300	0.00627	0.117	possibly correct	TRUE	02_1.50675.50675.2	SYWLATNAPMPMMPVGEQEIPR	K	Y	0.997	3.9	0.626	2			1259.6	2517.19	2518.19	2	0.0031	1.231	8433.89	166164	204539	1618	1639	TRUE
02_1	Uncategorized Sample	BioSample 1	02_1	g.16607 ORF g.16607 m.16607 type:complete len:1767 (+) comp255740_c0_seq2:320-5620(+)	m.16607	atrina_contam.fasta	172687	1	14	32	300	0.00627	0.117	possibly correct	TRUE	02_1.46064.46064.2	SYWLATNAPmPMmPVGEQEIPR	K	Y	0.997	3.69	0.645	2		m10: Oxidation (+15.99), m13: Oxidation (+15.99)	1275.6	2549.18	2550.18	2	0.001149	0.4505	7621.96	208714	317101	1618	1639	TRUE
02_1	Uncategorized Sample	BioSample 1	02_1	g.16607 ORF g.16607 m.16607 type:complete len:1767 (+) comp255740_c0_seq2:320-5620(+)	m.16607	atrina_contam.fasta	172687	1	14	32	300	0.00627	0.117	possibly correct	TRUE	02_1.41479.41479.2	SYWLATNAPmPMmPVGEQEIPR	K	Y	0.997	4.16	0.653	2		m10: Oxidation (+15.99), m13: Oxidation (+15.99)	1276.1	2550.18	2550.18	2	1.004	0.6347	6930.3	174455	359227	1618	1639	TRUE
02_1	Uncategorized Sample	BioSample 1	02_1	g.16607 ORF g.16607 m.16607 type:complete len:1767 (+) comp255740_c0_seq2:320-5620(+)	m.16607	atrina_contam.fasta	172687	1	14	32	300	0.00627	0.117	possibly correct	TRUE	02_1.43635.43635.2	SYWLATNAPmPMmPVGEQEIPR	K	Y	0.997	3.92	0.636	2		m10: Oxidation (+15.99), m13: Oxidation (+15.99)	1275.6	2549.18	2550.18	2	0.001986	0.7788	7246.34	268712	447605	1618	1639	TRUE
02_1	Uncategorized Sample	BioSample 1	02_1	g.16607 ORF g.16607 m.16607 type:complete len:1767 (+) comp255740_c0_seq2:320-5620(+)	m.16607	atrina_contam.fasta	172687	1	14	32	300	0.00627	0.117	possibly correct	TRUE	02_1.38577.38577.2	SYWLATNAPmPmmPVGEQEIPR	K	Y	0.997	3.84	0.643	2		m10: Oxidation (+15.99), m12: Oxidation (+15.99), m13: Oxidation (+15.99)	1283.59	2565.17	2566.18	2	-0.001494	-0.5822	6514.39	319931	762026	1618	1639	TRUE
02_1	Uncategorized Sample	BioSample 1	02_1	g.16607 ORF g.16607 m.16607 type:complete len:1767 (+) comp255740_c0_seq2:320-5620(+)	m.16607	atrina_contam.fasta	172687	1	14	32	300	0.00627	0.117	possibly correct	TRUE	02_1.46286.46286.2	SYWLATNAPmPMmPVGEQEIPR	K	Y	0.997	3.78	0.7	2		m10: Oxidation (+15.99), m13: Oxidation (+15.99)	1276.1	2550.18	2550.18	2	1.001	-0.6196	7663.05	179521	303543	1618	1639	TRUE
02_1	Uncategorized Sample	BioSample 1	02_1	g.16607 ORF g.16607 m.16607 type:complete len:1767 (+) comp255740_c0_seq2:320-5620(+)	m.16607	atrina_contam.fasta	172687	1	14	32	300	0.00627	0.117	possibly correct	TRUE	02_1.43483.43483.3	SYWLATNAPmPMmPVGEQEIPR	K	Y	0.997	3.76	0.546	2		m10: Oxidation (+15.99), m13: Oxidation (+15.99)	851.066	2550.18	2550.18	3	1.001	-0.8066	7224.51	540046	626831	1618	1639	TRUE
02_1	Uncategorized Sample	BioSample 1	02_1	g.16607 ORF g.16607 m.16607 type:complete len:1767 (+) comp255740_c0_seq2:320-5620(+)	m.16607	atrina_contam.fasta	172687	1	14	32	300	0.00627	0.117	possibly correct	TRUE	02_1.41322.41322.2	SYWLATNAPMPmmPVGEQEIPR	K	Y	0.997	4.42	0.622	2		m12: Oxidation (+15.99), m13: Oxidation (+15.99)	1275.6	2549.18	2550.18	2	0.000466	0.1827	6908.18	1340590	3771530	1618	1639	TRUE
02_1	Uncategorized Sample	BioSample 1	02_1	g.16607 ORF g.16607 m.16607 type:complete len:1767 (+) comp255740_c0_seq2:320-5620(+)	m.16607	atrina_contam.fasta	172687	1	14	32	300	0.00627	0.117	possibly correct	TRUE	02_1.43182.43182.2	SYWLATNAPmPMmPVGEQEIPR	K	Y	0.997	4.58	0.63	2		m10: Oxidation (+15.99), m13: Oxidation (+15.99)	1275.6	2549.18	2550.18	2	-1.302e-05	-0.005104	7181.59	521397	1054860	1618	1639	TRUE
02_1	Uncategorized Sample	BioSample 1	02_1	g.16607 ORF g.16607 m.16607 type:complete len:1767 (+) comp255740_c0_seq2:320-5620(+)	m.16607	atrina_contam.fasta	172687	1	14	32	300	0.00627	0.117	possibly correct	TRUE	02_1.43041.43041.2	SYWLATNAPmPMmPVGEQEIPR	K	Y	0.997	4.46	0.644	2		m10: Oxidation (+15.99), m13: Oxidation (+15.99)	1275.59	2549.17	2550.18	2	-0.000882	-0.3459	7160.48	605148	1325250	1618	1639	TRUE
02_1	Uncategorized Sample	BioSample 1	02_1	g.16607 ORF g.16607 m.16607 type:complete len:1767 (+) comp255740_c0_seq2:320-5620(+)	m.16607	atrina_contam.fasta	172687	1	14	32	300	0.00627	0.117	possibly correct	TRUE	02_1.46143.46143.2	SYWLATNAPMPMmPVGEQEIPR	K	Y	0.997	4.46	0.65	2		m13: Oxidation (+15.99)	1267.6	2533.18	2534.19	2	-0.000839	-0.3311	7635.06	507909	902127	1618	1639	TRUE
02_1	Uncategorized Sample	BioSample 1	02_1	g.16607 ORF g.16607 m.16607 type:complete len:1767 (+) comp255740_c0_seq2:320-5620(+)	m.16607	atrina_contam.fasta	172687	1	14	32	300	0.00627	0.117	possibly correct	TRUE	02_1.42896.42896.2	SYWLATNAPmPMmPVGEQEIPR	K	Y	0.997	4.53	0.644	2		m10: Oxidation (+15.99), m13: Oxidation (+15.99)	1275.6	2549.18	2550.18	2	0.000404	0.1584	7138.98	697356	1479610	1618	1639	TRUE
02_1	Uncategorized Sample	BioSample 1	02_1	g.16607 ORF g.16607 m.16607 type:complete len:1767 (+) comp255740_c0_seq2:320-5620(+)	m.16607	atrina_contam.fasta	172687	1	14	32	300	0.00627	0.117	possibly correct	TRUE	02_1.47492.47492.2	SYWLATNAPmPMMPVGEQEIPR	K	Y	0.997	4.07	0.682	2		m10: Oxidation (+15.99)	1267.6	2533.18	2534.19	2	0.002761	1.089	7864.39	237454	371347	1618	1639	TRUE
02_1	Uncategorized Sample	BioSample 1	02_1	g.16607 ORF g.16607 m.16607 type:complete len:1767 (+) comp255740_c0_seq2:320-5620(+)	m.16607	atrina_contam.fasta	172687	1	14	32	300	0.00627	0.117	possibly correct	TRUE	02_1.42740.42740.3	SYWLATNAPMPmmPVGEQEIPR	K	Y	0.997	3.46	0.564	2		m12: Oxidation (+15.99), m13: Oxidation (+15.99)	850.733	2549.18	2550.18	3	0.001159	0.4545	7115.85	1007460	1347430	1618	1639	TRUE
02_1	Uncategorized Sample	BioSample 1	02_1	g.16607 ORF g.16607 m.16607 type:complete len:1767 (+) comp255740_c0_seq2:320-5620(+)	m.16607	atrina_contam.fasta	172687	1	14	32	300	0.00627	0.117	possibly correct	TRUE	02_1.47612.47612.2	SYWLATNAPmPMMPVGEQEIPR	K	Y	0.997	4.31	0.675	2		m10: Oxidation (+15.99)	1267.6	2533.18	2534.19	2	-5.501e-05	-0.02171	7884.59	271561	422940	1618	1639	TRUE
02_1	Uncategorized Sample	BioSample 1	02_1	g.16607 ORF g.16607 m.16607 type:complete len:1767 (+) comp255740_c0_seq2:320-5620(+)	m.16607	atrina_contam.fasta	172687	1	14	32	300	0.00627	0.117	possibly correct	TRUE	02_1.41632.41632.2	SYWLATNAPmPMmPVGEQEIPR	K	Y	0.997	4.61	0.663	2		m10: Oxidation (+15.99), m13: Oxidation (+15.99)	1275.6	2549.18	2550.18	2	0.000197	0.07724	6952.22	427744	914581	1618	1639	TRUE
02_1	Uncategorized Sample	BioSample 1	02_1	g.16607 ORF g.16607 m.16607 type:complete len:1767 (+) comp255740_c0_seq2:320-5620(+)	m.16607	atrina_contam.fasta	172687	1	14	32	300	0.00627	0.117	possibly correct	TRUE	02_1.47377.47377.2	SYWLATNAPMPmMPVGEQEIPR	K	Y	0.997	4.27	0.705	2		m12: Oxidation (+15.99)	1267.6	2533.18	2534.19	2	0.000107	0.04222	7844.04	244747	328518	1618	1639	TRUE
02_1	Uncategorized Sample	BioSample 1	02_1	g.16607 ORF g.16607 m.16607 type:complete len:1767 (+) comp255740_c0_seq2:320-5620(+)	m.16607	atrina_contam.fasta	172687	1	14	32	300	0.00627	0.117	possibly correct	TRUE	02_1.38399.38399.3	SYWLATNAPmPmmPVGEQEIPR	K	Y	0.997	3.86	0.572	2		m10: Oxidation (+15.99), m12: Oxidation (+15.99), m13: Oxidation (+15.99)	856.065	2565.17	2566.18	3	0.002111	0.8226	6489.41	800667	1452870	1618	1639	TRUE
02_1	Uncategorized Sample	BioSample 1	02_1	g.16607 ORF g.16607 m.16607 type:complete len:1767 (+) comp255740_c0_seq2:320-5620(+)	m.16607	atrina_contam.fasta	172687	1	14	32	300	0.00627	0.117	possibly correct	TRUE	02_1.43181.43181.3	SYWLATNAPMPmmPVGEQEIPR	K	Y	0.997	3.84	0.587	2		m12: Oxidation (+15.99), m13: Oxidation (+15.99)	850.733	2549.18	2550.18	3	0.00115	0.4509	7181.46	1172110	1720190	1618	1639	TRUE
02_1	Uncategorized Sample	BioSample 1	02_1	g.16607 ORF g.16607 m.16607 type:complete len:1767 (+) comp255740_c0_seq2:320-5620(+)	m.16607	atrina_contam.fasta	172687	1	14	32	300	0.00627	0.117	possibly correct	TRUE	02_1.46267.46267.3	SYWLATNAPmPMmPVGEQEIPR	K	Y	0.997	3.68	0.591	2		m10: Oxidation (+15.99), m13: Oxidation (+15.99)	850.732	2549.17	2550.18	3	-0.000541	-0.2121	7659.13	317231	650452	1618	1639	TRUE
02_1	Uncategorized Sample	BioSample 1	02_1	g.16607 ORF g.16607 m.16607 type:complete len:1767 (+) comp255740_c0_seq2:320-5620(+)	m.16607	atrina_contam.fasta	172687	1	14	32	300	0.00627	0.117	possibly correct	TRUE	02_1.39159.39159.3	SYWLATNAPmPmmPVGEQEIPR	K	Y	0.997	3.38	0.612	2		m10: Oxidation (+15.99), m12: Oxidation (+15.99), m13: Oxidation (+15.99)	856.065	2565.17	2566.18	3	0.001905	0.7423	6597.97	392761	531134	1618	1639	TRUE
02_1	Uncategorized Sample	BioSample 1	02_1	g.16607 ORF g.16607 m.16607 type:complete len:1767 (+) comp255740_c0_seq2:320-5620(+)	m.16607	atrina_contam.fasta	172687	1	14	32	300	0.00627	0.117	possibly correct	TRUE	02_1.41604.41604.3	SYWLATNAPmPMmPVGEQEIPR	K	Y	0.997	3.91	0.583	2		m10: Oxidation (+15.99), m13: Oxidation (+15.99)	850.733	2549.18	2550.18	3	0.002107	0.8262	6948.22	900050	2134370	1618	1639	TRUE
02_1	Uncategorized Sample	BioSample 1	02_1	g.16607 ORF g.16607 m.16607 type:complete len:1767 (+) comp255740_c0_seq2:320-5620(+)	m.16607	atrina_contam.fasta	172687	1	14	32	300	0.00627	0.117	possibly correct	TRUE	02_1.38701.38701.3	SYWLATNAPmPmmPVGEQEIPR	K	Y	0.997	4.06	0.583	2		m10: Oxidation (+15.99), m12: Oxidation (+15.99), m13: Oxidation (+15.99)	856.064	2565.17	2566.18	3	0.000172	0.06702	6532.39	892592	1969250	1618	1639	TRUE
02_1	Uncategorized Sample	BioSample 1	02_1	g.16607 ORF g.16607 m.16607 type:complete len:1767 (+) comp255740_c0_seq2:320-5620(+)	m.16607	atrina_contam.fasta	172687	1	14	32	300	0.00627	0.117	possibly correct	TRUE	02_1.46120.46120.3	SYWLATNAPMPMmPVGEQEIPR	K	Y	0.997	4.52	0.562	2		m13: Oxidation (+15.99)	845.401	2533.18	2534.19	3	5.999e-05	0.02367	7631.28	1200410	1880150	1618	1639	TRUE
02_1	Uncategorized Sample	BioSample 1	02_1	g.16607 ORF g.16607 m.16607 type:complete len:1767 (+) comp255740_c0_seq2:320-5620(+)	m.16607	atrina_contam.fasta	172687	1	14	32	300	0.00627	0.117	possibly correct	TRUE	02_1.43331.43331.3	SYWLATNAPmPMmPVGEQEIPR	K	Y	0.997	3.59	0.61	2		m10: Oxidation (+15.99), m13: Oxidation (+15.99)	850.733	2549.18	2550.18	3	0.000851	0.3337	7202.77	845340	790124	1618	1639	TRUE
02_1	Uncategorized Sample	BioSample 1	02_1	g.16607 ORF g.16607 m.16607 type:complete len:1767 (+) comp255740_c0_seq2:320-5620(+)	m.16607	atrina_contam.fasta	172687	1	14	32	300	0.00627	0.117	possibly correct	TRUE	02_1.38846.38846.3	SYWLATNAPmPmmPVGEQEIPR	K	Y	0.997	3.9	0.603	2		m10: Oxidation (+15.99), m12: Oxidation (+15.99), m13: Oxidation (+15.99)	856.065	2565.17	2566.18	3	0.003511	1.368	6553.41	587448	1227880	1618	1639	TRUE
02_1	Uncategorized Sample	BioSample 1	02_1	g.16607 ORF g.16607 m.16607 type:complete len:1767 (+) comp255740_c0_seq2:320-5620(+)	m.16607	atrina_contam.fasta	172687	1	14	32	300	0.00627	0.117	possibly correct	TRUE	02_1.44438.44438.3	SYWLATNAPmPmMPVGEQEIPR	K	Y	0.997	3.99	0.604	2		m10: Oxidation (+15.99), m12: Oxidation (+15.99)	850.733	2549.18	2550.18	3	0.000524	0.2055	7359.97	435552	671073	1618	1639	TRUE
02_1	Uncategorized Sample	BioSample 1	02_1	g.16607 ORF g.16607 m.16607 type:complete len:1767 (+) comp255740_c0_seq2:320-5620(+)	m.16607	atrina_contam.fasta	172687	1	14	32	300	0.00627	0.117	possibly correct	TRUE	02_1.43031.43031.3	SYWLATNAPmPMmPVGEQEIPR	K	Y	0.997	4.23	0.607	2		m10: Oxidation (+15.99), m13: Oxidation (+15.99)	850.733	2549.18	2550.18	3	0.000772	0.3027	7159.01	1045160	3025090	1618	1639	TRUE
02_1	Uncategorized Sample	BioSample 1	02_1	g.16607 ORF g.16607 m.16607 type:complete len:1767 (+) comp255740_c0_seq2:320-5620(+)	m.16607	atrina_contam.fasta	172687	1	14	32	300	0.00627	0.117	possibly correct	TRUE	02_1.41306.41306.3	SYWLATNAPMPmmPVGEQEIPR	K	Y	0.997	3.7	0.624	2		m12: Oxidation (+15.99), m13: Oxidation (+15.99)	850.733	2549.18	2550.18	3	0.001662	0.6517	6905.94	3167910	8158750	1618	1639	TRUE
02_1	Uncategorized Sample	BioSample 1	02_1	g.16607 ORF g.16607 m.16607 type:complete len:1767 (+) comp255740_c0_seq2:320-5620(+)	m.16607	atrina_contam.fasta	172687	1	14	32	300	0.00627	0.117	possibly correct	TRUE	02_1.38557.38557.3	SYWLATNAPmPmmPVGEQEIPR	K	Y	0.997	4.02	0.611	2		m10: Oxidation (+15.99), m12: Oxidation (+15.99), m13: Oxidation (+15.99)	856.065	2565.17	2566.18	3	0.001997	0.7782	6511.62	927519	1569160	1618	1639	TRUE
02_1	Uncategorized Sample	BioSample 1	02_1	g.16607 ORF g.16607 m.16607 type:complete len:1767 (+) comp255740_c0_seq2:320-5620(+)	m.16607	atrina_contam.fasta	172687	1	14	32	300	0.00627	0.117	possibly correct	TRUE	02_1.37069.37069.3	SYWLATNAPmPmmPVGEQEIPR	K	Y	0.997	4.11	0.613	2		m10: Oxidation (+15.99), m12: Oxidation (+15.99), m13: Oxidation (+15.99)	856.065	2565.17	2566.18	3	0.002477	0.9652	6303.23	2069740	4875960	1618	1639	TRUE
02_1	Uncategorized Sample	BioSample 1	02_1	g.16607 ORF g.16607 m.16607 type:complete len:1767 (+) comp255740_c0_seq2:320-5620(+)	m.16607	atrina_contam.fasta	172687	1	14	32	300	0.00627	0.117	possibly correct	TRUE	02_1.48177.48177.3	SYWLATNAPMPmMPVGEQEIPR	K	Y	0.997	3.6	0.652	2		m12: Oxidation (+15.99)	845.401	2533.18	2534.19	3	0.001054	0.4159	7986.9	371759	748003	1618	1639	TRUE
02_1	Uncategorized Sample	BioSample 1	02_1	g.16607 ORF g.16607 m.16607 type:complete len:1767 (+) comp255740_c0_seq2:320-5620(+)	m.16607	atrina_contam.fasta	172687	1	14	32	300	0.00627	0.117	possibly correct	TRUE	02_1.42884.42884.3	SYWLATNAPMPmmPVGEQEIPR	K	Y	0.997	4.32	0.648	2		m12: Oxidation (+15.99), m13: Oxidation (+15.99)	850.733	2549.18	2550.18	3	0.001424	0.5584	7137.26	1099940	2930850	1618	1639	TRUE
02_1	Uncategorized Sample	BioSample 1	02_1	g.3185 ORF g.3185 m.3185 type:internal len:140 (+) comp231073_c0_seq1:3-425(+)	m.3185	atrina_contam.fasta	15687.4	1	2	3	3	6.27e-05	0.271	possibly correct	TRUE	02_1.13663.13663.3	GTGYGPQVIHEYK	K	I	0.997	2.79	0.54	2			483.577	1447.71	1448.72	3	0.000235	0.1622	3147.5	1151000	745170	66	78	TRUE
02_1	Uncategorized Sample	BioSample 1	02_1	g.3185 ORF g.3185 m.3185 type:internal len:140 (+) comp231073_c0_seq1:3-425(+)	m.3185	atrina_contam.fasta	15687.4	1	2	3	3	6.27e-05	0.271	possibly correct	TRUE	02_1.13699.13699.2	GTGYGPQVIHEYK	K	I	0.997	2.8	0.624	2			724.863	1447.71	1448.72	2	0.002361	1.63	3152.27	421264	454947	66	78	TRUE
02_1	Uncategorized Sample	BioSample 1	02_1	g.3185 ORF g.3185 m.3185 type:internal len:140 (+) comp231073_c0_seq1:3-425(+)	m.3185	atrina_contam.fasta	15687.4	1	2	3	3	6.27e-05	0.271	possibly correct	TRUE	02_1.53082.53082.3	TDIGDNTDVFHIDVVQQGELLLAGR	K	I	0.997	2.97	0.578	2			909.465	2725.37	2725.38	3	1.001	-0.707	8915.77	92902.1	48756	23	47	TRUE
02_1	Uncategorized Sample	BioSample 1	02_1	decoy_m.18751	decoy_m.18751		0	0.988	1	1	1	2.09e-05	0	possibly correct	TRUE	02_1.35925.35925.2	DLSSYVKSLDIR	R	Y	0.979	2.39	0.26	2			698.378	1394.74	1395.75	2	0.000178	0.1275	6144.17	319078	426558	0	0	TRUE
02_1	Uncategorized Sample	BioSample 1	02_1	g.6205 ORF g.6205 m.6205 type:complete len:104 (+) comp245230_c0_seq1:113-424(+)	m.6205	atrina_contam.fasta	11714.2	0.99	1	1	1	2.09e-05	0.126	possibly correct	TRUE	02_1.26232.26232.2	EFNNPNSGVNFIR	K	H	0.997	3.46	0.482	2			754.368	1506.72	1507.73	2	-0.00021	-0.1393	4814.48	279478	348713	53	65	TRUE
02_1	Uncategorized Sample	BioSample 1	02_1	g.11054 ORF g.11054 m.11054 type:internal len:282 (+) comp251912_c0_seq2:3-851(+)	m.11054	atrina_contam.fasta	30810.8	1	6	6	9	0.000188	0.234	possibly correct	TRUE	02_1.18423.18423.2	AEDVLSNLK	K	G	0.997	2.49	0.42	2			494.769	987.524	988.531	2	0.000196	0.1983	3777.56	951784	495052	135	143	TRUE
02_1	Uncategorized Sample	BioSample 1	02_1	g.11054 ORF g.11054 m.11054 type:internal len:282 (+) comp251912_c0_seq2:3-851(+)	m.11054	atrina_contam.fasta	30810.8	1	6	6	9	0.000188	0.234	possibly correct	TRUE	02_1.18263.18263.2	AEDVLSNLK	K	G	0.997	2.44	0.453	2			494.769	987.524	988.531	2	0.000588	0.5948	3756.46	835403	500865	135	143	TRUE
02_1	Uncategorized Sample	BioSample 1	02_1	g.11054 ORF g.11054 m.11054 type:internal len:282 (+) comp251912_c0_seq2:3-851(+)	m.11054	atrina_contam.fasta	30810.8	1	6	6	9	0.000188	0.234	possibly correct	TRUE	02_1.9872.9872.2	IAEETLAmR	K	I	0.98	2.14	0.346	2		m8: Oxidation (+15.99)	525.269	1048.52	1049.53	2	0.000863	0.8223	2643.84	589294	630098	67	75	TRUE
02_1	Uncategorized Sample	BioSample 1	02_1	g.11054 ORF g.11054 m.11054 type:internal len:282 (+) comp251912_c0_seq2:3-851(+)	m.11054	atrina_contam.fasta	30810.8	1	6	6	9	0.000188	0.234	possibly correct	TRUE	02_1.39833.39833.2	ISGFLDLDSATPEEVTK	K	I	0.997	4.68	0.631	2			911.46	1820.9	1821.91	2	0.00012	0.06586	6694.76	2051790	2793130	50	66	TRUE
02_1	Uncategorized Sample	BioSample 1	02_1	g.11054 ORF g.11054 m.11054 type:internal len:282 (+) comp251912_c0_seq2:3-851(+)	m.11054	atrina_contam.fasta	30810.8	1	6	6	9	0.000188	0.234	possibly correct	TRUE	02_1.8289.8289.2	LQSmYIENQR	K	K	0.986	2.34	0.336	2		m4: Oxidation (+15.99)	649.314	1296.61	1297.62	2	0.000163	0.1256	2434.21	411530	529534	201	210	TRUE
02_1	Uncategorized Sample	BioSample 1	02_1	g.11054 ORF g.11054 m.11054 type:internal len:282 (+) comp251912_c0_seq2:3-851(+)	m.11054	atrina_contam.fasta	30810.8	1	6	6	9	0.000188	0.234	possibly correct	TRUE	02_1.18966.18966.2	NDAQLAYNEALK	K	V	0.997	3.37	0.519	2			675.338	1348.66	1349.67	2	-0.001053	-0.7802	3850.24	1134290	1328270	20	31	TRUE
02_1	Uncategorized Sample	BioSample 1	02_1	g.11054 ORF g.11054 m.11054 type:internal len:282 (+) comp251912_c0_seq2:3-851(+)	m.11054	atrina_contam.fasta	30810.8	1	6	6	9	0.000188	0.234	possibly correct	TRUE	02_1.37614.37614.2	TmLQDLLFK	R	I	0.976	1.81	0.372	2		m2: Oxidation (+15.99)	562.805	1123.6	1124.6	2	0.000361	0.321	6379.02	331678	91176	41	49	TRUE
02_1	Uncategorized Sample	BioSample 1	02_1	g.11054 ORF g.11054 m.11054 type:internal len:282 (+) comp251912_c0_seq2:3-851(+)	m.11054	atrina_contam.fasta	30810.8	1	6	6	9	0.000188	0.234	possibly correct	TRUE	02_1.40784.40784.2	TmLQDLLFK	R	I	0.988	2.22	0.385	2		m2: Oxidation (+15.99)	562.805	1123.6	1124.6	2	5.899e-05	0.05246	6829.79	167666	114789	41	49	TRUE
02_1	Uncategorized Sample	BioSample 1	02_1	g.11054 ORF g.11054 m.11054 type:internal len:282 (+) comp251912_c0_seq2:3-851(+)	m.11054	atrina_contam.fasta	30810.8	1	6	6	9	0.000188	0.234	possibly correct	TRUE	02_1.37456.37456.2	TmLQDLLFK	R	I	0.99	2.18	0.426	2		m2: Oxidation (+15.99)	562.805	1123.59	1124.6	2	1.199e-05	0.01066	6357.1	195586	167473	41	49	TRUE
02_1	Uncategorized Sample	BioSample 1	02_1	g.11009 ORF g.11009 m.11009 type:complete len:1249 (+) comp251875_c0_seq1:137-3883(+)	m.11009	atrina_contam.fasta	140864	1	3	3	3	6.27e-05	0.0361	possibly correct	TRUE	02_1.23787.23787.2	IQVEGPPEEVDDAVK	K	A	0.997	2.83	0.441	2			812.906	1623.8	1624.81	2	-0.001333	-0.8204	4486.73	233333	370773	397	411	TRUE
02_1	Uncategorized Sample	BioSample 1	02_1	g.11009 ORF g.11009 m.11009 type:complete len:1249 (+) comp251875_c0_seq1:137-3883(+)	m.11009	atrina_contam.fasta	140864	1	3	3	3	6.27e-05	0.0361	possibly correct	TRUE	02_1.6363.6363.3	VHIEFTEGKDK	K	I	0.991	2.06	0.447	2			434.894	1301.66	1302.67	3	-0.000712	-0.5466	2177.21	226552	154666	386	396	TRUE
02_1	Uncategorized Sample	BioSample 1	02_1	g.11009 ORF g.11009 m.11009 type:complete len:1249 (+) comp251875_c0_seq1:137-3883(+)	m.11009	atrina_contam.fasta	140864	1	3	3	3	6.27e-05	0.0361	possibly correct	TRUE	02_1.42972.42972.2	VIFPSNDDPDQETIIVIGK	R	K	0.989	2.46	0.517	2			1051.05	2100.08	2100.09	2	1.004	0.785	7150.17	103666	130377	750	768	TRUE
02_1	Uncategorized Sample	BioSample 1	02_1	g.10451 ORF g.10451 m.10451 type:5prime_partial len:536 (+) comp251584_c0_seq1:2-1609(+)	m.10451	atrina_contam.fasta	59801.2	1	11	12	15	0.000313	0.316	possibly correct	TRUE	02_1.10858.10858.4	ADRPAKPGVTQLPDSPTPR	R	T	0.997	3.04	0.418	2			501.522	2002.06	2003.07	4	-0.001281	-0.6395	2774.52	810605	1622090	152	170	TRUE
02_1	Uncategorized Sample	BioSample 1	02_1	g.10451 ORF g.10451 m.10451 type:5prime_partial len:536 (+) comp251584_c0_seq1:2-1609(+)	m.10451	atrina_contam.fasta	59801.2	1	11	12	15	0.000313	0.316	possibly correct	TRUE	02_1.10909.10909.3	ADRPAKPGVTQLPDSPTPR	R	T	0.997	3.31	0.456	2			668.694	2003.06	2003.07	3	1.002	-0.5128	2781.19	539512	928726	152	170	TRUE
02_1	Uncategorized Sample	BioSample 1	02_1	g.10451 ORF g.10451 m.10451 type:5prime_partial len:536 (+) comp251584_c0_seq1:2-1609(+)	m.10451	atrina_contam.fasta	59801.2	1	11	12	15	0.000313	0.316	possibly correct	TRUE	02_1.33027.33027.2	FKDFLSAWDK	R	S	0.989	2.54	0.247	2			628.819	1255.62	1256.63	2	-0.000222	-0.1767	5740.91	660009	640006	320	329	TRUE
02_1	Uncategorized Sample	BioSample 1	02_1	g.10451 ORF g.10451 m.10451 type:5prime_partial len:536 (+) comp251584_c0_seq1:2-1609(+)	m.10451	atrina_contam.fasta	59801.2	1	11	12	15	0.000313	0.316	possibly correct	TRUE	02_1.38786.38786.2	ISATNMFGTAAPNSIIVK	R	T	0.995	2.96	0.382	2			917.99	1833.97	1834.97	2	7.8e-05	0.04251	6544.6	262249	464086	356	373	TRUE
02_1	Uncategorized Sample	BioSample 1	02_1	g.10451 ORF g.10451 m.10451 type:5prime_partial len:536 (+) comp251584_c0_seq1:2-1609(+)	m.10451	atrina_contam.fasta	59801.2	1	11	12	15	0.000313	0.316	possibly correct	TRUE	02_1.7829.7829.2	ITDLQTGPTEK	K	T	0.997	3	0.453	2			601.816	1201.62	1202.63	2	-0.001517	-1.261	2373.1	543516	787257	102	112	TRUE
02_1	Uncategorized Sample	BioSample 1	02_1	g.10451 ORF g.10451 m.10451 type:5prime_partial len:536 (+) comp251584_c0_seq1:2-1609(+)	m.10451	atrina_contam.fasta	59801.2	1	11	12	15	0.000313	0.316	possibly correct	TRUE	02_1.24617.24617.2	LKPLSFYEVR	K	I	0.977	1.66	0.479	2			626.358	1250.7	1251.71	2	-0.000411	-0.3284	4596.89	499161	555671	346	355	TRUE
02_1	Uncategorized Sample	BioSample 1	02_1	g.10451 ORF g.10451 m.10451 type:5prime_partial len:536 (+) comp251584_c0_seq1:2-1609(+)	m.10451	atrina_contam.fasta	59801.2	1	11	12	15	0.000313	0.316	possibly correct	TRUE	02_1.45897.45897.3	LTVNTLAPADNGFFTcEATNEAATMATQK	R	A	0.995	2.45	0.598	2	c16: Carbamidomethyl (+57.02)		1030.15	3087.43	3087.44	3	0.9981	-1.487	7594.36	89514.2	37721	13	41	TRUE
02_1	Uncategorized Sample	BioSample 1	02_1	g.10451 ORF g.10451 m.10451 type:5prime_partial len:536 (+) comp251584_c0_seq1:2-1609(+)	m.10451	atrina_contam.fasta	59801.2	1	11	12	15	0.000313	0.316	possibly correct	TRUE	02_1.32737.32737.2	NGGDPIVSYTVEYR	K	Q	0.997	2.75	0.581	2			785.876	1569.74	1569.75	2	0.9897	-8.324	5700.98	188980	191113	290	303	TRUE
02_1	Uncategorized Sample	BioSample 1	02_1	g.10451 ORF g.10451 m.10451 type:5prime_partial len:536 (+) comp251584_c0_seq1:2-1609(+)	m.10451	atrina_contam.fasta	59801.2	1	11	12	15	0.000313	0.316	possibly correct	TRUE	02_1.28785.28785.2	NGGDPIVSYTVEYR	K	Q	0.997	3.96	0.545	2			785.381	1568.75	1569.75	2	0.000878	0.5593	5163.48	383007	377777	290	303	TRUE
02_1	Uncategorized Sample	BioSample 1	02_1	g.10451 ORF g.10451 m.10451 type:5prime_partial len:536 (+) comp251584_c0_seq1:2-1609(+)	m.10451	atrina_contam.fasta	59801.2	1	11	12	15	0.000313	0.316	possibly correct	TRUE	02_1.12038.12038.3	QVSVHEDKDPVTNEWR	R	F	0.997	4.21	0.526	2			647.316	1938.93	1938.93	3	1.003	0.08884	2932.19	558933	1174130	304	319	TRUE
02_1	Uncategorized Sample	BioSample 1	02_1	g.10451 ORF g.10451 m.10451 type:5prime_partial len:536 (+) comp251584_c0_seq1:2-1609(+)	m.10451	atrina_contam.fasta	59801.2	1	11	12	15	0.000313	0.316	possibly correct	TRUE	02_1.15834.15834.3	SLKPLSGQATSTVLQK	K	L	0.992	2.63	0.357	2			553.321	1656.94	1657.95	3	-0.000258	-0.1556	3436.16	826629	416676	330	345	TRUE
02_1	Uncategorized Sample	BioSample 1	02_1	g.10451 ORF g.10451 m.10451 type:5prime_partial len:536 (+) comp251584_c0_seq1:2-1609(+)	m.10451	atrina_contam.fasta	59801.2	1	11	12	15	0.000313	0.316	possibly correct	TRUE	02_1.34591.34591.2	TIPINFLDNENQK	K	T	0.983	2.68	0.398	2			773.4	1544.79	1545.79	2	0.002528	1.635	5958.33	1095590	1950320	208	220	TRUE
02_1	Uncategorized Sample	BioSample 1	02_1	g.10451 ORF g.10451 m.10451 type:5prime_partial len:536 (+) comp251584_c0_seq1:2-1609(+)	m.10451	atrina_contam.fasta	59801.2	1	11	12	15	0.000313	0.316	possibly correct	TRUE	02_1.34753.34753.2	TIPINFLDNENQK	K	T	0.988	2.1	0.459	2			773.399	1544.78	1545.79	2	-0.000188	-0.1216	5980.88	255350	390191	208	220	TRUE
02_1	Uncategorized Sample	BioSample 1	02_1	g.10451 ORF g.10451 m.10451 type:5prime_partial len:536 (+) comp251584_c0_seq1:2-1609(+)	m.10451	atrina_contam.fasta	59801.2	1	11	12	15	0.000313	0.316	possibly correct	TRUE	02_1.32381.32381.2	TLEVDDIDNLEPK	K	T	0.997	3.32	0.322	2			750.875	1499.74	1500.74	2	0.000307	0.2046	5651.22	1545270	1549490	221	233	TRUE
02_1	Uncategorized Sample	BioSample 1	02_1	g.10451 ORF g.10451 m.10451 type:5prime_partial len:536 (+) comp251584_c0_seq1:2-1609(+)	m.10451	atrina_contam.fasta	59801.2	1	11	12	15	0.000313	0.316	possibly correct	TRUE	02_1.32223.32223.2	TLEVDDIDNLEPK	K	T	0.997	3.21	0.401	2			750.875	1499.74	1500.74	2	0.000118	0.07863	5629.4	394720	449425	221	233	TRUE
02_1	Uncategorized Sample	BioSample 1	02_1	g.6187 ORF g.6187 m.6187 type:internal len:151 (+) comp244246_c1_seq1:2-457(+)	m.6187	atrina_contam.fasta	16668.6	1	2	2	3	6.27e-05	0.159	possibly correct	TRUE	02_1.33904.33904.2	NTADAFDLLR	R	R	0.979	2.07	0.233	2			568.291	1134.57	1135.57	2	0.001093	0.9625	5863.02	258937	109350	46	55	TRUE
02_1	Uncategorized Sample	BioSample 1	02_1	g.6187 ORF g.6187 m.6187 type:internal len:151 (+) comp244246_c1_seq1:2-457(+)	m.6187	atrina_contam.fasta	16668.6	1	2	2	3	6.27e-05	0.159	possibly correct	TRUE	02_1.34062.34062.2	NTADAFDLLR	R	R	0.987	2.27	0.192	2			568.291	1134.57	1135.57	2	0.000183	0.1612	5884.78	359681	116455	46	55	TRUE
02_1	Uncategorized Sample	BioSample 1	02_1	g.6187 ORF g.6187 m.6187 type:internal len:151 (+) comp244246_c1_seq1:2-457(+)	m.6187	atrina_contam.fasta	16668.6	1	2	2	3	6.27e-05	0.159	possibly correct	TRUE	02_1.51673.51673.2	SDAPNIILLITTGK	R	A	0.997	3	0.554	2			728.424	1454.83	1455.84	2	-0.001181	-0.8112	8621.4	452068	530495	67	80	TRUE
02_1	Uncategorized Sample	BioSample 1	02_1	g.6186 ORF g.6186 m.6186 type:3prime_partial len:146 (+) comp244246_c0_seq1:22-462(+)	m.6186	atrina_contam.fasta	16243.5	1	7	7	9	0.000188	0.507	possibly correct	TRUE	02_1.12882.12882.2	AIDNISYDSR	K	S	0.997	2.59	0.578	2			577.278	1152.54	1153.55	2	0.000114	0.09883	3044.1	1623490	1785320	109	118	TRUE
02_1	Uncategorized Sample	BioSample 1	02_1	g.6186 ORF g.6186 m.6186 type:3prime_partial len:146 (+) comp244246_c0_seq1:22-462(+)	m.6186	atrina_contam.fasta	16243.5	1	7	7	9	0.000188	0.507	possibly correct	TRUE	02_1.10715.10715.2	ANFELIKK	K	A	0.988	2.36	0.207	2			481.787	961.559	962.567	2	-0.00067	-0.6961	2755.87	1248620	1134250	56	63	TRUE
02_1	Uncategorized Sample	BioSample 1	02_1	g.6186 ORF g.6186 m.6186 type:3prime_partial len:146 (+) comp244246_c0_seq1:22-462(+)	m.6186	atrina_contam.fasta	16243.5	1	7	7	9	0.000188	0.507	possibly correct	TRUE	02_1.36673.36673.2	FTNLAAGLSIVK	K	L	0.997	2.99	0.493	2			617.363	1232.71	1233.72	2	-0.001053	-0.8535	6248.36	185235	394093	121	132	TRUE
02_1	Uncategorized Sample	BioSample 1	02_1	g.6186 ORF g.6186 m.6186 type:3prime_partial len:146 (+) comp244246_c0_seq1:22-462(+)	m.6186	atrina_contam.fasta	16243.5	1	7	7	9	0.000188	0.507	possibly correct	TRUE	02_1.30857.30857.2	SKFTNLAAGLSIVK	R	L	0.997	3.06	0.48	2			724.926	1447.84	1448.85	2	-0.003308	-2.283	5444.29	277051	388748	119	132	TRUE
02_1	Uncategorized Sample	BioSample 1	02_1	g.6186 ORF g.6186 m.6186 type:3prime_partial len:146 (+) comp244246_c0_seq1:22-462(+)	m.6186	atrina_contam.fasta	16243.5	1	7	7	9	0.000188	0.507	possibly correct	TRUE	02_1.23783.23783.2	SLLEGADVDADNVR	K	V	0.997	3.84	0.507	2			737.362	1472.71	1473.72	2	-0.000498	-0.3379	4486.2	2170350	4115060	67	80	TRUE
02_1	Uncategorized Sample	BioSample 1	02_1	g.6186 ORF g.6186 m.6186 type:3prime_partial len:146 (+) comp244246_c0_seq1:22-462(+)	m.6186	atrina_contam.fasta	16243.5	1	7	7	9	0.000188	0.507	possibly correct	TRUE	02_1.4244.4244.2	TYEQNKDGLMK	K	A	0.997	2.74	0.401	2			663.822	1325.63	1326.64	2	0.000185	0.1395	1898.3	456202	650004	98	108	TRUE
02_1	Uncategorized Sample	BioSample 1	02_1	g.6186 ORF g.6186 m.6186 type:3prime_partial len:146 (+) comp244246_c0_seq1:22-462(+)	m.6186	atrina_contam.fasta	16243.5	1	7	7	9	0.000188	0.507	possibly correct	TRUE	02_1.51779.51779.2	VGVVLYGLEGTSVFDLK	R	T	0.979	2.01	0.552	2			898.997	1795.98	1795.98	2	1.002	-0.5847	8644.06	83124	51694	81	97	TRUE
02_1	Uncategorized Sample	BioSample 1	02_1	g.6186 ORF g.6186 m.6186 type:3prime_partial len:146 (+) comp244246_c0_seq1:22-462(+)	m.6186	atrina_contam.fasta	16243.5	1	7	7	9	0.000188	0.507	possibly correct	TRUE	02_1.52000.52000.2	VGVVLYGLEGTSVFDLK	R	T	0.996	1.99	0.663	2			898.495	1794.98	1795.98	2	-0.000638	-0.3552	8686.86	79781	45385	81	97	TRUE
02_1	Uncategorized Sample	BioSample 1	02_1	g.6186 ORF g.6186 m.6186 type:3prime_partial len:146 (+) comp244246_c0_seq1:22-462(+)	m.6186	atrina_contam.fasta	16243.5	1	7	7	9	0.000188	0.507	possibly correct	TRUE	02_1.51890.51890.2	VGVVLYGLEGTSVFDLK	R	T	0.997	4.21	0.646	2			898.496	1794.98	1795.98	2	0.000743	0.4137	8665.25	1045610	1463800	81	97	TRUE
02_1	Uncategorized Sample	BioSample 1	02_1	g.16555 ORF g.16555 m.16555 type:5prime_partial len:477 (+) comp255722_c0_seq1:3-1433(+)	m.16555,m.16556	atrina_contam.fasta	50584.3	1	2	2	2	4.18e-05	0.0609	possibly correct	TRUE	02_1.33712.33712.2	AAVEEGIVPGGGTALLR	R	S	0.984	3.19	0.316	2			805.448	1608.88	1609.89	2	-0.00153	-0.9504	5836.89	381576	414006	329	345	TRUE
02_1	Uncategorized Sample	BioSample 1	02_1	g.16555 ORF g.16555 m.16555 type:5prime_partial len:477 (+) comp255722_c0_seq1:3-1433(+)	m.16555,m.16556	atrina_contam.fasta	50584.3	1	2	2	2	4.18e-05	0.0609	possibly correct	TRUE	02_1.5347.5347.2	VGGTSEVEVNEK	K	K	0.997	3.02	0.51	2			624.311	1246.61	1247.61	2	0.003068	2.459	2042.46	248806	337660	305	316	TRUE
02_1	Uncategorized Sample	BioSample 1	02_1	g.18643 ORF g.18643 m.18643 type:5prime_partial len:829 (+) comp256623_c0_seq1:2-2488(+)	m.18643,m.18644	atrina_contam.fasta	94057.9	1	1	1	1	2.09e-05	0.0229	possibly correct	TRUE	02_1.47567.47567.2	TSDAIPNVDAIVSFEcGYR	R	V	0.987	1.8	0.611	2	c16: Carbamidomethyl (+57.02)		1057.5	2112.98	2113.99	2	-0.001087	-0.5143	7876.57	82036.4	69926	145	163	TRUE
02_1	Uncategorized Sample	BioSample 1	02_1	g.6117 ORF g.6117 m.6117 type:complete len:754 (+) comp245191_c0_seq1:99-2360(+)	m.6117	atrina_contam.fasta	84683	0.993	1	1	1	2.09e-05	0.0186	possibly correct	TRUE	02_1.35570.35570.2	ASDVDFSLLGNVQK	K	S	0.997	2.82	0.476	2			746.887	1491.76	1492.76	2	0.003003	2.012	6094.83	124589	90745	537	550	TRUE
02_1	Uncategorized Sample	BioSample 1	02_1	g.11930 ORF g.11930 m.11930 type:internal len:171 (+) comp253302_c3_seq1:1-516(+)	m.11930	atrina_contam.fasta	19030.4	1	2	3	4	8.35e-05	0.216	possibly correct	TRUE	02_1.43230.43230.3	SQESDQSYWLPIPPDQVPNEAGK	K	C	0.997	2.65	0.561	2			862.411	2584.21	2585.22	3	0.002498	0.9663	7188.48	178286	327807	29	51	TRUE
02_1	Uncategorized Sample	BioSample 1	02_1	g.11930 ORF g.11930 m.11930 type:internal len:171 (+) comp253302_c3_seq1:1-516(+)	m.11930	atrina_contam.fasta	19030.4	1	2	3	4	8.35e-05	0.216	possibly correct	TRUE	02_1.43231.43231.2	SQESDQSYWLPIPPDQVPNEAGK	K	C	0.997	2.77	0.585	2			1293.61	2585.21	2585.22	2	1.004	0.4831	7188.62	145826	221923	29	51	TRUE
02_1	Uncategorized Sample	BioSample 1	02_1	g.11930 ORF g.11930 m.11930 type:internal len:171 (+) comp253302_c3_seq1:1-516(+)	m.11930	atrina_contam.fasta	19030.4	1	2	3	4	8.35e-05	0.216	possibly correct	TRUE	02_1.38319.38319.2	YVFFTGSNSGDVFK	K	L	0.997	3.45	0.552	2			784.376	1566.74	1567.74	2	0.001674	1.068	6478.22	258449	420834	108	121	TRUE
02_1	Uncategorized Sample	BioSample 1	02_1	g.11930 ORF g.11930 m.11930 type:internal len:171 (+) comp253302_c3_seq1:1-516(+)	m.11930	atrina_contam.fasta	19030.4	1	2	3	4	8.35e-05	0.216	possibly correct	TRUE	02_1.38477.38477.2	YVFFTGSNSGDVFK	K	L	0.997	3.12	0.631	2			784.376	1566.74	1567.74	2	0.001008	0.643	6500.37	379660	575557	108	121	TRUE
02_1	Uncategorized Sample	BioSample 1	02_1	g.15928 ORF g.15928 m.15928 type:5prime_partial len:518 (+) comp255380_c2_seq2:1-1554(+)	m.15928	atrina_contam.fasta	58152.2	1	6	6	6	0.000125	0.17	possibly correct	TRUE	02_1.26591.26591.2	EDTIVFYQPK	K	K	0.996	2.36	0.528	2			620.317	1238.62	1239.63	2	0.001133	0.914	4863.02	180977	440975	216	225	TRUE
02_1	Uncategorized Sample	BioSample 1	02_1	g.15928 ORF g.15928 m.15928 type:5prime_partial len:518 (+) comp255380_c2_seq2:1-1554(+)	m.15928	atrina_contam.fasta	58152.2	1	6	6	6	0.000125	0.17	possibly correct	TRUE	02_1.49800.49800.2	FSQPLVVAYFDVDYTK	K	N	0.99	1.94	0.652	2			946.978	1891.94	1891.95	2	1.001	-0.8192	8270.99	75104.6	51187	270	285	TRUE
02_1	Uncategorized Sample	BioSample 1	02_1	g.15928 ORF g.15928 m.15928 type:5prime_partial len:518 (+) comp255380_c2_seq2:1-1554(+)	m.15928	atrina_contam.fasta	58152.2	1	6	6	6	0.000125	0.17	possibly correct	TRUE	02_1.53122.53122.3	MDATANDVGKPFEVSGFPTIFFVPK	K	G	0.981	2.28	0.401	2			905.456	2713.35	2714.35	3	-0.000586	-0.2159	8926.27	199507	74209	446	470	TRUE
02_1	Uncategorized Sample	BioSample 1	02_1	g.15928 ORF g.15928 m.15928 type:5prime_partial len:518 (+) comp255380_c2_seq2:1-1554(+)	m.15928	atrina_contam.fasta	58152.2	1	6	6	6	0.000125	0.17	possibly correct	TRUE	02_1.6982.6982.2	SEAVPDSNDGPVK	K	T	0.997	2.9	0.6	2			658.316	1314.62	1314.62	2	1.007	2.926	2260.68	264842	850246	379	391	TRUE
02_1	Uncategorized Sample	BioSample 1	02_1	g.15928 ORF g.15928 m.15928 type:5prime_partial len:518 (+) comp255380_c2_seq2:1-1554(+)	m.15928	atrina_contam.fasta	58152.2	1	6	6	6	0.000125	0.17	possibly correct	TRUE	02_1.35783.35783.2	TFQSVADAMSTELK	K	F	0.997	2.95	0.566	2			764.372	1526.73	1527.74	2	0.000678	0.4438	6124.49	276298	210815	187	200	TRUE
02_1	Uncategorized Sample	BioSample 1	02_1	g.15928 ORF g.15928 m.15928 type:5prime_partial len:518 (+) comp255380_c2_seq2:1-1554(+)	m.15928	atrina_contam.fasta	58152.2	1	6	6	6	0.000125	0.17	possibly correct	TRUE	02_1.20171.20171.2	YGVSGYPTLK	K	I	0.992	2.3	0.574	2			542.786	1083.56	1084.57	2	-0.002637	-2.431	4008.7	672236	467335	112	121	TRUE
02_1	Uncategorized Sample	BioSample 1	02_1	g.593 ORF g.593 m.593 type:complete len:110 (+) comp164660_c0_seq1:182-511(+)	m.593	atrina_contam.fasta	11918.7	1	2	3	3	6.27e-05	0.321	possibly correct	TRUE	02_1.30553.30553.2	SAGNVLQLTVVR	K	G	0.997	3.73	0.507	2			628.869	1255.72	1256.73	2	-0.000971	-0.7726	5403.14	409860	405285	74	85	TRUE
02_1	Uncategorized Sample	BioSample 1	02_1	g.593 ORF g.593 m.593 type:complete len:110 (+) comp164660_c0_seq1:182-511(+)	m.593	atrina_contam.fasta	11918.7	1	2	3	3	6.27e-05	0.321	possibly correct	TRUE	02_1.35946.35946.2	VQPGTPSAGQLSAGDAILGINNR	K	S	0.984	2.45	0.546	2			1119.09	2236.17	2236.17	2	1.006	1.363	6147.06	198878	269206	36	58	TRUE
02_1	Uncategorized Sample	BioSample 1	02_1	g.593 ORF g.593 m.593 type:complete len:110 (+) comp164660_c0_seq1:182-511(+)	m.593	atrina_contam.fasta	11918.7	1	2	3	3	6.27e-05	0.321	possibly correct	TRUE	02_1.35929.35929.3	VQPGTPSAGQLSAGDAILGINNR	K	S	0.997	2.85	0.543	2			746.062	2235.16	2236.17	3	0.003401	1.521	6144.7	230488	197090	36	58	TRUE
02_1	Uncategorized Sample	BioSample 1	02_1	g.15915 ORF g.15915 m.15915 type:5prime_partial len:653 (+) comp255372_c5_seq1:2-1960(+)	m.15915,m.15916	atrina_contam.fasta	73176.9	1	5	5	8	0.000167	0.109	possibly correct	TRUE	02_1.42556.42556.2	AAVTNVIIDIVR	K	N	0.989	2.24	0.534	2			642.387	1282.76	1283.77	2	-0.000922	-0.7182	7089.2	92056.2	78485	30	41	TRUE
02_1	Uncategorized Sample	BioSample 1	02_1	g.15915 ORF g.15915 m.15915 type:5prime_partial len:653 (+) comp255372_c5_seq1:2-1960(+)	m.15915,m.15916	atrina_contam.fasta	73176.9	1	5	5	8	0.000167	0.109	possibly correct	TRUE	02_1.42704.42704.2	AAVTNVIIDIVR	K	N	0.997	3.92	0.582	2			642.388	1282.76	1283.77	2	-0.000201	-0.1566	7110.49	1925230	2987470	30	41	TRUE
02_1	Uncategorized Sample	BioSample 1	02_1	g.15915 ORF g.15915 m.15915 type:5prime_partial len:653 (+) comp255372_c5_seq1:2-1960(+)	m.15915,m.15916	atrina_contam.fasta	73176.9	1	5	5	8	0.000167	0.109	possibly correct	TRUE	02_1.34094.34094.2	GLVYIATSLPTDK	R	A	0.997	3.34	0.618	2			689.385	1376.76	1377.76	2	-0.000295	-0.2141	5889.38	892275	923993	110	122	TRUE
02_1	Uncategorized Sample	BioSample 1	02_1	g.15915 ORF g.15915 m.15915 type:5prime_partial len:653 (+) comp255372_c5_seq1:2-1960(+)	m.15915,m.15916	atrina_contam.fasta	73176.9	1	5	5	8	0.000167	0.109	possibly correct	TRUE	02_1.33937.33937.2	GLVYIATSLPTDK	R	A	0.997	3.04	0.659	2			689.385	1376.76	1377.76	2	0.000164	0.119	5867.57	108550	152887	110	122	TRUE
02_1	Uncategorized Sample	BioSample 1	02_1	g.15915 ORF g.15915 m.15915 type:5prime_partial len:653 (+) comp255372_c5_seq1:2-1960(+)	m.15915,m.15916	atrina_contam.fasta	73176.9	1	5	5	8	0.000167	0.109	possibly correct	TRUE	02_1.40681.40681.3	LcSDTTVSVALGHAQIVDGQLGFK	K	R	0.997	3.1	0.544	2	c2: Carbamidomethyl (+57.02)		839.767	2516.28	2516.28	3	1.005	1.036	6814.76	100901	128825	141	164	TRUE
02_1	Uncategorized Sample	BioSample 1	02_1	g.15915 ORF g.15915 m.15915 type:5prime_partial len:653 (+) comp255372_c5_seq1:2-1960(+)	m.15915,m.15916	atrina_contam.fasta	73176.9	1	5	5	8	0.000167	0.109	possibly correct	TRUE	02_1.40833.40833.3	LcSDTTVSVALGHAQIVDGQLGFK	K	R	0.997	3.93	0.611	2	c2: Carbamidomethyl (+57.02)		839.433	2515.28	2516.28	3	0.002576	1.024	6836.8	176251	145894	141	164	TRUE
02_1	Uncategorized Sample	BioSample 1	02_1	g.15915 ORF g.15915 m.15915 type:5prime_partial len:653 (+) comp255372_c5_seq1:2-1960(+)	m.15915,m.15916	atrina_contam.fasta	73176.9	1	5	5	8	0.000167	0.109	possibly correct	TRUE	02_1.37998.37998.2	LFYLDIPENK	R	E	0.988	2.12	0.366	2			626.335	1250.65	1251.66	2	-0.000272	-0.2173	6433.14	400266	497682	167	176	TRUE
02_1	Uncategorized Sample	BioSample 1	02_1	g.15915 ORF g.15915 m.15915 type:5prime_partial len:653 (+) comp255372_c5_seq1:2-1960(+)	m.15915,m.15916	atrina_contam.fasta	73176.9	1	5	5	8	0.000167	0.109	possibly correct	TRUE	02_1.19387.19387.2	TANSYTLSVVAK	R	D	0.997	2.92	0.475	2			627.341	1252.67	1253.67	2	0.000254	0.2026	3905.73	708046	1896030	11	22	TRUE
02_1	Uncategorized Sample	BioSample 1	02_1	g.15914 ORF g.15914 m.15914 type:internal len:335 (+) comp255372_c3_seq1:1-1008(+)	m.15914	atrina_contam.fasta	36872.3	1	3	4	6	0.000125	0.149	possibly correct	TRUE	02_1.51631.51631.2	IATDYFSIDPYSGLISVK	R	K	0.997	4.68	0.536	2			995.014	1988.01	1989.02	2	-0.000297	-0.1493	8611.63	889713	1152340	131	148	TRUE
02_1	Uncategorized Sample	BioSample 1	02_1	g.15914 ORF g.15914 m.15914 type:internal len:335 (+) comp255372_c3_seq1:1-1008(+)	m.15914	atrina_contam.fasta	36872.3	1	3	4	6	0.000125	0.149	possibly correct	TRUE	02_1.50457.50457.2	VIGFQPGTSYFYLVEDGGQGDIR	R	V	0.997	3.71	0.732	2			1259.62	2517.22	2518.23	2	-0.001876	-0.745	8392.7	112429	160357	16	38	TRUE
02_1	Uncategorized Sample	BioSample 1	02_1	g.15914 ORF g.15914 m.15914 type:internal len:335 (+) comp255372_c3_seq1:1-1008(+)	m.15914	atrina_contam.fasta	36872.3	1	3	4	6	0.000125	0.149	possibly correct	TRUE	02_1.50563.50563.2	VIGFQPGTSYFYLVEDGGQGDIR	R	V	0.997	4.54	0.727	2			1259.62	2517.22	2518.23	2	0.001055	0.4189	8413.28	247517	456858	16	38	TRUE
02_1	Uncategorized Sample	BioSample 1	02_1	g.15914 ORF g.15914 m.15914 type:internal len:335 (+) comp255372_c3_seq1:1-1008(+)	m.15914	atrina_contam.fasta	36872.3	1	3	4	6	0.000125	0.149	possibly correct	TRUE	02_1.50557.50557.3	VIGFQPGTSYFYLVEDGGQGDIR	R	V	0.997	3.99	0.643	2			840.08	2517.22	2518.23	3	0.000732	0.2907	8411.89	394859	382617	16	38	TRUE
02_1	Uncategorized Sample	BioSample 1	02_1	g.15914 ORF g.15914 m.15914 type:internal len:335 (+) comp255372_c3_seq1:1-1008(+)	m.15914	atrina_contam.fasta	36872.3	1	3	4	6	0.000125	0.149	possibly correct	TRUE	02_1.8367.8367.2	VQAVEQDLR	-	G	0.981	2.07	0.275	2			529.286	1056.56	1057.56	2	0.000158	0.1494	2445.07	737266	804892	1	9	TRUE
02_1	Uncategorized Sample	BioSample 1	02_1	g.15914 ORF g.15914 m.15914 type:internal len:335 (+) comp255372_c3_seq1:1-1008(+)	m.15914	atrina_contam.fasta	36872.3	1	3	4	6	0.000125	0.149	possibly correct	TRUE	02_1.8206.8206.2	VQAVEQDLR	-	G	0.997	2.62	0.461	2			529.285	1056.56	1057.56	2	-0.000138	-0.1305	2422.79	588993	555351	1	9	TRUE
02_1	Uncategorized Sample	BioSample 1	02_1	g.5411 ORF g.5411 m.5411 type:complete len:502 (+) comp243077_c0_seq1:164-1669(+)	m.5411	atrina_contam.fasta	53874.1	1	18	19	22	0.000459	0.419	possibly correct	TRUE	02_1.18375.18375.2	AIVGEcVNALQK	K	T	0.997	3.33	0.348	2	c6: Carbamidomethyl (+57.02)		651.347	1300.68	1301.69	2	-0.001332	-1.024	3771.23	1142070	1626770	394	405	TRUE
02_1	Uncategorized Sample	BioSample 1	02_1	g.5411 ORF g.5411 m.5411 type:complete len:502 (+) comp243077_c0_seq1:164-1669(+)	m.5411	atrina_contam.fasta	53874.1	1	18	19	22	0.000459	0.419	possibly correct	TRUE	02_1.23561.23561.2	cGLQQGDIILK	K	I	0.997	3.53	0.457	2	c1: Carbamidomethyl (+57.02)		622.837	1243.66	1244.67	2	0.0003537	0.2842	4455.94	436782	625942	47	57	TRUE
02_1	Uncategorized Sample	BioSample 1	02_1	g.5411 ORF g.5411 m.5411 type:complete len:502 (+) comp243077_c0_seq1:164-1669(+)	m.5411	atrina_contam.fasta	53874.1	1	18	19	22	0.000459	0.419	possibly correct	TRUE	02_1.33879.33879.2	DIIDSGQEPPAAQQPSPPWR	K	D	0.995	3.13	0.552	2			1095.53	2189.05	2189.06	2	0.9954	-3.356	5859.58	269074	397401	212	231	TRUE
02_1	Uncategorized Sample	BioSample 1	02_1	g.5411 ORF g.5411 m.5411 type:complete len:502 (+) comp243077_c0_seq1:164-1669(+)	m.5411	atrina_contam.fasta	53874.1	1	18	19	22	0.000459	0.419	possibly correct	TRUE	02_1.33812.33812.3	DIIDSGQEPPAAQQPSPPWR	K	D	0.997	3.09	0.536	2			730.359	2188.05	2189.06	3	-0.000934	-0.4267	5850.45	207167	237395	212	231	TRUE
02_1	Uncategorized Sample	BioSample 1	02_1	g.5411 ORF g.5411 m.5411 type:complete len:502 (+) comp243077_c0_seq1:164-1669(+)	m.5411	atrina_contam.fasta	53874.1	1	18	19	22	0.000459	0.419	possibly correct	TRUE	02_1.17778.17778.3	DQPPPPAPPAPPAQQVR	R	P	0.997	3.43	0.454	2			588.313	1761.92	1762.92	3	0.000601	0.3409	3692.64	463983	782934	232	248	TRUE
02_1	Uncategorized Sample	BioSample 1	02_1	g.5411 ORF g.5411 m.5411 type:complete len:502 (+) comp243077_c0_seq1:164-1669(+)	m.5411	atrina_contam.fasta	53874.1	1	18	19	22	0.000459	0.419	possibly correct	TRUE	02_1.23531.23531.3	DQPPPPAPPAPPAQQVRPAPVAPAAPK	R	P	0.997	3.11	0.557	2			888.489	2662.44	2662.45	3	1.004	0.5153	4451.93	598636	2087800	232	258	TRUE
02_1	Uncategorized Sample	BioSample 1	02_1	g.5411 ORF g.5411 m.5411 type:complete len:502 (+) comp243077_c0_seq1:164-1669(+)	m.5411	atrina_contam.fasta	53874.1	1	18	19	22	0.000459	0.419	possibly correct	TRUE	02_1.17560.17560.2	EAQDcILLSGNK	K	L	0.997	3.27	0.54	2	c5: Carbamidomethyl (+57.02)		674.332	1346.65	1347.66	2	-0.001323	-0.9819	3664.33	538106	912827	70	81	TRUE
02_1	Uncategorized Sample	BioSample 1	02_1	g.5411 ORF g.5411 m.5411 type:complete len:502 (+) comp243077_c0_seq1:164-1669(+)	m.5411	atrina_contam.fasta	53874.1	1	18	19	22	0.000459	0.419	possibly correct	TRUE	02_1.44518.44518.3	EAQDcILLSGNKLDLLLQR	K	I	0.997	4	0.548	2	c5: Carbamidomethyl (+57.02)		733.731	2198.17	2199.18	3	-0.001182	-0.5376	7371.98	114511	220390	70	88	TRUE
02_1	Uncategorized Sample	BioSample 1	02_1	g.5411 ORF g.5411 m.5411 type:complete len:502 (+) comp243077_c0_seq1:164-1669(+)	m.5411	atrina_contam.fasta	53874.1	1	18	19	22	0.000459	0.419	possibly correct	TRUE	02_1.37329.37329.2	EFGcPLTILR	K	V	0.988	2.07	0.517	2	c4: Carbamidomethyl (+57.02)		603.321	1204.63	1205.63	2	-0.0007873	-0.653	6339.43	507005	600082	28	37	TRUE
02_1	Uncategorized Sample	BioSample 1	02_1	g.5411 ORF g.5411 m.5411 type:complete len:502 (+) comp243077_c0_seq1:164-1669(+)	m.5411	atrina_contam.fasta	53874.1	1	18	19	22	0.000459	0.419	possibly correct	TRUE	02_1.37485.37485.2	EFGcPLTILR	K	V	0.997	2.4	0.522	2	c4: Carbamidomethyl (+57.02)		603.321	1204.63	1205.63	2	-0.0004763	-0.3951	6361.13	701636	861048	28	37	TRUE
02_1	Uncategorized Sample	BioSample 1	02_1	g.5411 ORF g.5411 m.5411 type:complete len:502 (+) comp243077_c0_seq1:164-1669(+)	m.5411	atrina_contam.fasta	53874.1	1	18	19	22	0.000459	0.419	possibly correct	TRUE	02_1.34127.34127.4	HKEAQDcILLSGNKLDLLLQR	K	I	0.997	3.59	0.5	2	c7: Carbamidomethyl (+57.02)		616.839	2463.33	2464.33	4	0.0001597	0.0648	5893.9	643039	549653	68	88	TRUE
02_1	Uncategorized Sample	BioSample 1	02_1	g.5411 ORF g.5411 m.5411 type:complete len:502 (+) comp243077_c0_seq1:164-1669(+)	m.5411	atrina_contam.fasta	53874.1	1	18	19	22	0.000459	0.419	possibly correct	TRUE	02_1.12214.12214.2	LIQGGGSVQQPTYEK	K	F	0.997	3.52	0.541	2			802.917	1603.82	1604.83	2	-0.000788	-0.491	2955	750584	1308380	99	113	TRUE
02_1	Uncategorized Sample	BioSample 1	02_1	g.5411 ORF g.5411 m.5411 type:complete len:502 (+) comp243077_c0_seq1:164-1669(+)	m.5411	atrina_contam.fasta	53874.1	1	18	19	22	0.000459	0.419	possibly correct	TRUE	02_1.48760.48760.2	LLDIGFVEEGGYLYcEK	K	D	0.997	2.1	0.694	2	c15: Carbamidomethyl (+57.02)		1002.98	2003.95	2004.96	2	-0.001694	-0.8451	8082.53	76008.3	58510	362	378	TRUE
02_1	Uncategorized Sample	BioSample 1	02_1	g.5411 ORF g.5411 m.5411 type:complete len:502 (+) comp243077_c0_seq1:164-1669(+)	m.5411	atrina_contam.fasta	53874.1	1	18	19	22	0.000459	0.419	possibly correct	TRUE	02_1.48647.48647.2	LLDIGFVEEGGYLYcEK	K	D	0.997	2.65	0.684	2	c15: Carbamidomethyl (+57.02)		1003.49	2004.96	2004.96	2	1.007	2.186	8061.67	75700.4	60133	362	378	TRUE
02_1	Uncategorized Sample	BioSample 1	02_1	g.5411 ORF g.5411 m.5411 type:complete len:502 (+) comp243077_c0_seq1:164-1669(+)	m.5411	atrina_contam.fasta	53874.1	1	18	19	22	0.000459	0.419	possibly correct	TRUE	02_1.6314.6314.2	PAPVAPAAPK	R	P	0.984	1.99	0.343	2			459.774	917.534	918.541	2	0.000367	0.3995	2170.66	649306	822397	249	258	TRUE
02_1	Uncategorized Sample	BioSample 1	02_1	g.5411 ORF g.5411 m.5411 type:complete len:502 (+) comp243077_c0_seq1:164-1669(+)	m.5411	atrina_contam.fasta	53874.1	1	18	19	22	0.000459	0.419	possibly correct	TRUE	02_1.30288.30288.3	QPIGGNQFHLEDGNAYcENDWR	K	Q	0.997	3.72	0.531	2	c17: Carbamidomethyl (+57.02)		874.38	2620.12	2620.13	3	0.9988	-1.485	5366.03	396346	579869	419	440	TRUE
02_1	Uncategorized Sample	BioSample 1	02_1	g.5411 ORF g.5411 m.5411 type:complete len:502 (+) comp243077_c0_seq1:164-1669(+)	m.5411	atrina_contam.fasta	53874.1	1	18	19	22	0.000459	0.419	possibly correct	TRUE	02_1.13351.13351.4	TFHPGcFLcHQcK	K	Q	0.997	2	0.572	2	c6: Carbamidomethyl (+57.02), c9: Carbamidomethyl (+57.02), c12: Carbamidomethyl (+57.02)		423.687	1690.72	1691.72	4	0.0004291	0.2536	3105.68	566987	88698	406	418	TRUE
02_1	Uncategorized Sample	BioSample 1	02_1	g.5411 ORF g.5411 m.5411 type:complete len:502 (+) comp243077_c0_seq1:164-1669(+)	m.5411	atrina_contam.fasta	53874.1	1	18	19	22	0.000459	0.419	possibly correct	TRUE	02_1.20585.20585.2	TWcPDHFVcANPR	K	C	0.986	1.89	0.564	2	c3: Carbamidomethyl (+57.02), c9: Carbamidomethyl (+57.02)		830.362	1658.71	1659.72	2	0.002092	1.261	4062.83	209619	208005	345	357	TRUE
02_1	Uncategorized Sample	BioSample 1	02_1	g.5411 ORF g.5411 m.5411 type:complete len:502 (+) comp243077_c0_seq1:164-1669(+)	m.5411	atrina_contam.fasta	53874.1	1	18	19	22	0.000459	0.419	possibly correct	TRUE	02_1.28068.28068.2	VEPSTPWGFR	R	M	0.988	1.95	0.497	2			588.296	1174.58	1175.58	2	-0.000223	-0.1897	5064.87	2869110	2862910	13	22	TRUE
02_1	Uncategorized Sample	BioSample 1	02_1	g.5411 ORF g.5411 m.5411 type:complete len:502 (+) comp243077_c0_seq1:164-1669(+)	m.5411	atrina_contam.fasta	53874.1	1	18	19	22	0.000459	0.419	possibly correct	TRUE	02_1.2549.2549.3	YADSEDKPPTSSQQSR	K	S	0.997	3.04	0.655	2			599.609	1795.8	1795.81	3	1.002	-0.6832	1674.3	3086750	5237420	190	205	TRUE
02_1	Uncategorized Sample	BioSample 1	02_1	g.5411 ORF g.5411 m.5411 type:complete len:502 (+) comp243077_c0_seq1:164-1669(+)	m.5411	atrina_contam.fasta	53874.1	1	18	19	22	0.000459	0.419	possibly correct	TRUE	02_1.33934.33934.3	YLKDIIDSGQEPPAAQQPSPPWR	K	D	0.997	3.85	0.489	2			865.105	2592.29	2593.3	3	-0.003522	-1.358	5867.17	592012	704348	209	231	TRUE
02_1	Uncategorized Sample	BioSample 1	02_1	g.5411 ORF g.5411 m.5411 type:complete len:502 (+) comp243077_c0_seq1:164-1669(+)	m.5411	atrina_contam.fasta	53874.1	1	18	19	22	0.000459	0.419	possibly correct	TRUE	02_1.33775.33775.3	YLKDIIDSGQEPPAAQQPSPPWR	K	D	0.997	4.47	0.576	2			865.106	2592.29	2593.3	3	-0.002897	-1.117	5845.43	425751	618695	209	231	TRUE
02_1	Uncategorized Sample	BioSample 1	02_1	g.4881 ORF g.4881 m.4881 type:internal len:209 (+) comp241034_c0_seq1:3-632(+)	m.4881	atrina_contam.fasta	22829.2	1	8	13	39	0.000814	0.646	possibly correct	TRUE	02_1.53798.53798.2	DLNDSPEYVGEIQDLIVIPSSK	R	G	0.996	2.55	0.548	2			1216.12	2430.22	2431.22	2	0.000407	0.1674	9074.8	123999	124797	115	136	TRUE
02_1	Uncategorized Sample	BioSample 1	02_1	g.4881 ORF g.4881 m.4881 type:internal len:209 (+) comp241034_c0_seq1:3-632(+)	m.4881	atrina_contam.fasta	22829.2	1	8	13	39	0.000814	0.646	possibly correct	TRUE	02_1.53718.53718.3	DLNDSPEYVGEIQDLIVIPSSK	R	G	0.997	3.4	0.515	2			811.078	2430.21	2431.22	3	-0.005009	-2.06	9056.01	569504	362041	115	136	TRUE
02_1	Uncategorized Sample	BioSample 1	02_1	g.4881 ORF g.4881 m.4881 type:internal len:209 (+) comp241034_c0_seq1:3-632(+)	m.4881	atrina_contam.fasta	22829.2	1	8	13	39	0.000814	0.646	possibly correct	TRUE	02_1.53614.53614.2	DLNDSPEYVGEIQDLIVIPSSK	R	G	0.997	3.54	0.663	2			1216.12	2430.22	2431.22	2	-0.001006	-0.4138	9033.67	130800	199417	115	136	TRUE
02_1	Uncategorized Sample	BioSample 1	02_1	g.4881 ORF g.4881 m.4881 type:internal len:209 (+) comp241034_c0_seq1:3-632(+)	m.4881	atrina_contam.fasta	22829.2	1	8	13	39	0.000814	0.646	possibly correct	TRUE	02_1.53711.53711.2	DLNDSPEYVGEIQDLIVIPSSK	R	G	0.997	5.77	0.676	2			1216.11	2430.21	2431.22	2	-0.004319	-1.776	9054.26	2204140	3819410	115	136	TRUE
02_1	Uncategorized Sample	BioSample 1	02_1	g.4881 ORF g.4881 m.4881 type:internal len:209 (+) comp241034_c0_seq1:3-632(+)	m.4881	atrina_contam.fasta	22829.2	1	8	13	39	0.000814	0.646	possibly correct	TRUE	02_1.39742.39742.2	DQSFVDGNLGAIVDESGGK	R	V	0.997	3.38	0.65	2			954.452	1906.89	1907.9	2	-0.001522	-0.7977	6681.7	156255	177490	161	179	TRUE
02_1	Uncategorized Sample	BioSample 1	02_1	g.4881 ORF g.4881 m.4881 type:internal len:209 (+) comp241034_c0_seq1:3-632(+)	m.4881	atrina_contam.fasta	22829.2	1	8	13	39	0.000814	0.646	possibly correct	TRUE	02_1.44853.44853.3	EILGLYVGQNSLFLHSDDEANTPR	R	S	0.993	2.65	0.482	2			896.781	2687.32	2688.33	3	0.002356	0.8764	7427.46	70701.5	75261	30	53	TRUE
02_1	Uncategorized Sample	BioSample 1	02_1	g.4881 ORF g.4881 m.4881 type:internal len:209 (+) comp241034_c0_seq1:3-632(+)	m.4881	atrina_contam.fasta	22829.2	1	8	13	39	0.000814	0.646	possibly correct	TRUE	02_1.44736.44736.3	EILGLYVGQNSLFLHSDDEANTPR	R	S	0.997	3.47	0.623	2			897.115	2688.32	2688.33	3	1.003	-0.04746	7406.66	105937	140409	30	53	TRUE
02_1	Uncategorized Sample	BioSample 1	02_1	g.4881 ORF g.4881 m.4881 type:internal len:209 (+) comp241034_c0_seq1:3-632(+)	m.4881	atrina_contam.fasta	22829.2	1	8	13	39	0.000814	0.646	possibly correct	TRUE	02_1.44374.44374.2	EILGLYVGQNSLFLHSDDEANTPR	R	S	0.997	3.81	0.689	2			1345.17	2688.33	2688.33	2	1.01	2.882	7350.84	82495	178174	30	53	TRUE
02_1	Uncategorized Sample	BioSample 1	02_1	g.4881 ORF g.4881 m.4881 type:internal len:209 (+) comp241034_c0_seq1:3-632(+)	m.4881	atrina_contam.fasta	22829.2	1	8	13	39	0.000814	0.646	possibly correct	TRUE	02_1.46243.46243.3	EILGLYVGQNSLFLHSDDEANTPR	R	S	0.997	5.03	0.575	2			897.109	2688.31	2688.33	3	0.9873	-5.748	7654.37	303070	629180	30	53	TRUE
02_1	Uncategorized Sample	BioSample 1	02_1	g.4881 ORF g.4881 m.4881 type:internal len:209 (+) comp241034_c0_seq1:3-632(+)	m.4881	atrina_contam.fasta	22829.2	1	8	13	39	0.000814	0.646	possibly correct	TRUE	02_1.44609.44609.3	EILGLYVGQNSLFLHSDDEANTPR	R	S	0.997	4.45	0.647	2			896.781	2687.32	2688.33	3	0.000508	0.189	7386.24	201352	419916	30	53	TRUE
02_1	Uncategorized Sample	BioSample 1	02_1	g.4881 ORF g.4881 m.4881 type:internal len:209 (+) comp241034_c0_seq1:3-632(+)	m.4881	atrina_contam.fasta	22829.2	1	8	13	39	0.000814	0.646	possibly correct	TRUE	02_1.44435.44435.3	EILGLYVGQNSLFLHSDDEANTPR	R	S	0.997	6.33	0.642	2			896.781	2687.32	2688.33	3	0.000343	0.1276	7359.58	4088670	9843580	30	53	TRUE
02_1	Uncategorized Sample	BioSample 1	02_1	g.4881 ORF g.4881 m.4881 type:internal len:209 (+) comp241034_c0_seq1:3-632(+)	m.4881	atrina_contam.fasta	22829.2	1	8	13	39	0.000814	0.646	possibly correct	TRUE	02_1.47664.47664.3	HDTVEASTTDAGVEVPLLTIYNEEAR	R	E	0.977	2.16	0.507	2			944.131	2829.37	2830.37	3	0.004989	1.763	7893.49	67479.9	66993	4	29	TRUE
02_1	Uncategorized Sample	BioSample 1	02_1	g.4881 ORF g.4881 m.4881 type:internal len:209 (+) comp241034_c0_seq1:3-632(+)	m.4881	atrina_contam.fasta	22829.2	1	8	13	39	0.000814	0.646	possibly correct	TRUE	02_1.47772.47772.3	HDTVEASTTDAGVEVPLLTIYNEEAR	R	E	0.994	2.51	0.553	2			944.131	2829.37	2830.37	3	0.00474	1.675	7914.36	67869.6	68648	4	29	TRUE
02_1	Uncategorized Sample	BioSample 1	02_1	g.4881 ORF g.4881 m.4881 type:internal len:209 (+) comp241034_c0_seq1:3-632(+)	m.4881	atrina_contam.fasta	22829.2	1	8	13	39	0.000814	0.646	possibly correct	TRUE	02_1.45687.45687.3	HDTVEASTTDAGVEVPLLTIYNEEAR	R	E	0.995	2.02	0.619	2			944.465	2830.37	2830.37	3	1.007	1.615	7559.51	77532.7	29943	4	29	TRUE
02_1	Uncategorized Sample	BioSample 1	02_1	g.4881 ORF g.4881 m.4881 type:internal len:209 (+) comp241034_c0_seq1:3-632(+)	m.4881	atrina_contam.fasta	22829.2	1	8	13	39	0.000814	0.646	possibly correct	TRUE	02_1.45527.45527.3	HDTVEASTTDAGVEVPLLTIYNEEAR	R	E	0.997	3.03	0.575	2			944.466	2830.38	2830.37	3	1.01	2.674	7534.87	107893	99890	4	29	TRUE
02_1	Uncategorized Sample	BioSample 1	02_1	g.4881 ORF g.4881 m.4881 type:internal len:209 (+) comp241034_c0_seq1:3-632(+)	m.4881	atrina_contam.fasta	22829.2	1	8	13	39	0.000814	0.646	possibly correct	TRUE	02_1.44874.44874.3	HDTVEASTTDAGVEVPLLTIYNEEAR	R	E	0.997	2.78	0.61	2			944.129	2829.37	2830.37	3	-0.001891	-0.6681	7430.7	67900.1	101549	4	29	TRUE
02_1	Uncategorized Sample	BioSample 1	02_1	g.4881 ORF g.4881 m.4881 type:internal len:209 (+) comp241034_c0_seq1:3-632(+)	m.4881	atrina_contam.fasta	22829.2	1	8	13	39	0.000814	0.646	possibly correct	TRUE	02_1.45038.45038.2	HDTVEASTTDAGVEVPLLTIYNEEAR	R	E	0.997	5.51	0.734	2			1416.19	2830.37	2830.37	2	1.003	0.1587	7456.33	116963	231378	4	29	TRUE
02_1	Uncategorized Sample	BioSample 1	02_1	g.4881 ORF g.4881 m.4881 type:internal len:209 (+) comp241034_c0_seq1:3-632(+)	m.4881	atrina_contam.fasta	22829.2	1	8	13	39	0.000814	0.646	possibly correct	TRUE	02_1.45136.45136.3	HDTVEASTTDAGVEVPLLTIYNEEAR	R	E	0.997	6.95	0.615	2			944.13	2829.37	2830.37	3	0.000211	0.07455	7472.21	5707440	15946100	4	29	TRUE
02_1	Uncategorized Sample	BioSample 1	02_1	g.4881 ORF g.4881 m.4881 type:internal len:209 (+) comp241034_c0_seq1:3-632(+)	m.4881	atrina_contam.fasta	22829.2	1	8	13	39	0.000814	0.646	possibly correct	TRUE	02_1.45004.45004.3	HDTVEASTTDAGVEVPLLTIYNEEAR	R	E	0.997	6.3	0.661	2			944.464	2830.37	2830.37	3	1.004	0.3434	7451.42	1358740	2928480	4	29	TRUE
02_1	Uncategorized Sample	BioSample 1	02_1	g.4881 ORF g.4881 m.4881 type:internal len:209 (+) comp241034_c0_seq1:3-632(+)	m.4881	atrina_contam.fasta	22829.2	1	8	13	39	0.000814	0.646	possibly correct	TRUE	02_1.45168.45168.2	HDTVEASTTDAGVEVPLLTIYNEEAR	R	E	0.997	7.86	0.773	2			1415.69	2829.37	2830.37	2	-0.001592	-0.5625	7477.01	171820	526837	4	29	TRUE
02_1	Uncategorized Sample	BioSample 1	02_1	g.4881 ORF g.4881 m.4881 type:internal len:209 (+) comp241034_c0_seq1:3-632(+)	m.4881	atrina_contam.fasta	22829.2	1	8	13	39	0.000814	0.646	possibly correct	TRUE	02_1.45265.45265.3	HDTVEASTTDAGVEVPLLTIYNEEAR	R	E	0.997	6.05	0.695	2			944.13	2829.37	2830.37	3	0.001347	0.4759	7492.76	628200	1560580	4	29	TRUE
02_1	Uncategorized Sample	BioSample 1	02_1	g.4881 ORF g.4881 m.4881 type:internal len:209 (+) comp241034_c0_seq1:3-632(+)	m.4881	atrina_contam.fasta	22829.2	1	8	13	39	0.000814	0.646	possibly correct	TRUE	02_1.45398.45398.3	HDTVEASTTDAGVEVPLLTIYNEEAR	R	E	0.997	5.47	0.714	2			944.13	2829.37	2830.37	3	0.002454	0.867	7513.55	260374	465103	4	29	TRUE
02_1	Uncategorized Sample	BioSample 1	02_1	g.4881 ORF g.4881 m.4881 type:internal len:209 (+) comp241034_c0_seq1:3-632(+)	m.4881	atrina_contam.fasta	22829.2	1	8	13	39	0.000814	0.646	possibly correct	TRUE	02_1.20743.20743.2	mTPWFDcQEQK	R	E	0.977	2.26	0.364	2	c7: Carbamidomethyl (+57.02)	m1: Oxidation (+15.99)	743.312	1484.61	1485.61	2	0.002658	1.789	4083.73	775163	1066510	80	90	TRUE
02_1	Uncategorized Sample	BioSample 1	02_1	g.4881 ORF g.4881 m.4881 type:internal len:209 (+) comp241034_c0_seq1:3-632(+)	m.4881	atrina_contam.fasta	22829.2	1	8	13	39	0.000814	0.646	possibly correct	TRUE	02_1.25945.25945.2	MTPWFDcQEQK	R	E	0.993	2.49	0.428	2	c7: Carbamidomethyl (+57.02)		735.313	1468.61	1469.62	2	-0.0002003	-0.1363	4775.7	1972510	2222540	80	90	TRUE
02_1	Uncategorized Sample	BioSample 1	02_1	g.4881 ORF g.4881 m.4881 type:internal len:209 (+) comp241034_c0_seq1:3-632(+)	m.4881	atrina_contam.fasta	22829.2	1	8	13	39	0.000814	0.646	possibly correct	TRUE	02_1.26101.26101.2	MTPWFDcQEQK	R	E	0.997	2.22	0.657	2	c7: Carbamidomethyl (+57.02)		735.313	1468.61	1469.62	2	-0.001109	-0.7548	4796.87	526821	530634	80	90	TRUE
02_1	Uncategorized Sample	BioSample 1	02_1	g.4881 ORF g.4881 m.4881 type:internal len:209 (+) comp241034_c0_seq1:3-632(+)	m.4881	atrina_contam.fasta	22829.2	1	8	13	39	0.000814	0.646	possibly correct	TRUE	02_1.22599.22599.2	mTPWFDcQEQK	R	E	0.997	2.73	0.619	2	c7: Carbamidomethyl (+57.02)	m1: Oxidation (+15.99)	743.311	1484.61	1485.61	2	0.0009687	0.652	4327.49	457264	574574	80	90	TRUE
02_1	Uncategorized Sample	BioSample 1	02_1	g.4881 ORF g.4881 m.4881 type:internal len:209 (+) comp241034_c0_seq1:3-632(+)	m.4881	atrina_contam.fasta	22829.2	1	8	13	39	0.000814	0.646	possibly correct	TRUE	02_1.38692.38692.2	SmGSAFSSTGLVFVGR	R	D	0.994	2.68	0.522	2		m2: Oxidation (+15.99)	809.899	1617.78	1618.79	2	0.001956	1.208	6530.89	92128.3	91860	99	114	TRUE
02_1	Uncategorized Sample	BioSample 1	02_1	g.4881 ORF g.4881 m.4881 type:internal len:209 (+) comp241034_c0_seq1:3-632(+)	m.4881	atrina_contam.fasta	22829.2	1	8	13	39	0.000814	0.646	possibly correct	TRUE	02_1.39771.39771.2	SmGSAFSSTGLVFVGR	R	D	0.997	3	0.656	2		m2: Oxidation (+15.99)	809.897	1617.78	1618.79	2	-0.003406	-2.104	6685.78	96940.7	64410	99	114	TRUE
02_1	Uncategorized Sample	BioSample 1	02_1	g.4881 ORF g.4881 m.4881 type:internal len:209 (+) comp241034_c0_seq1:3-632(+)	m.4881	atrina_contam.fasta	22829.2	1	8	13	39	0.000814	0.646	possibly correct	TRUE	02_1.39282.39282.2	SmGSAFSSTGLVFVGR	R	D	0.997	2.91	0.705	2		m2: Oxidation (+15.99)	810.407	1618.8	1618.79	2	1.017	8.788	6615.23	98662.6	111938	99	114	TRUE
02_1	Uncategorized Sample	BioSample 1	02_1	g.4881 ORF g.4881 m.4881 type:internal len:209 (+) comp241034_c0_seq1:3-632(+)	m.4881	atrina_contam.fasta	22829.2	1	8	13	39	0.000814	0.646	possibly correct	TRUE	02_1.38401.38401.2	SmGSAFSSTGLVFVGR	R	D	0.997	3.73	0.638	2		m2: Oxidation (+15.99)	809.899	1617.78	1618.79	2	0.00213	1.316	6489.67	261979	284627	99	114	TRUE
02_1	Uncategorized Sample	BioSample 1	02_1	g.4881 ORF g.4881 m.4881 type:internal len:209 (+) comp241034_c0_seq1:3-632(+)	m.4881	atrina_contam.fasta	22829.2	1	8	13	39	0.000814	0.646	possibly correct	TRUE	02_1.40975.40975.2	SMGSAFSSTGLVFVGR	R	D	0.997	3.82	0.644	2			801.901	1601.79	1602.79	2	-0.000601	-0.375	6857.13	208038	334706	99	114	TRUE
02_1	Uncategorized Sample	BioSample 1	02_1	g.4881 ORF g.4881 m.4881 type:internal len:209 (+) comp241034_c0_seq1:3-632(+)	m.4881	atrina_contam.fasta	22829.2	1	8	13	39	0.000814	0.646	possibly correct	TRUE	02_1.41117.41117.2	SMGSAFSSTGLVFVGR	R	D	0.997	4.08	0.654	2			801.901	1601.79	1602.79	2	0.000151	0.09421	6878.05	1399330	2389390	99	114	TRUE
02_1	Uncategorized Sample	BioSample 1	02_1	g.4881 ORF g.4881 m.4881 type:internal len:209 (+) comp241034_c0_seq1:3-632(+)	m.4881	atrina_contam.fasta	22829.2	1	8	13	39	0.000814	0.646	possibly correct	TRUE	02_1.37885.37885.2	SmGSAFSSTGLVFVGR	R	D	0.997	3.83	0.676	2		m2: Oxidation (+15.99)	809.899	1617.78	1618.79	2	0.000805	0.4973	6417.46	548094	738516	99	114	TRUE
02_1	Uncategorized Sample	BioSample 1	02_1	g.4881 ORF g.4881 m.4881 type:internal len:209 (+) comp241034_c0_seq1:3-632(+)	m.4881	atrina_contam.fasta	22829.2	1	8	13	39	0.000814	0.646	possibly correct	TRUE	02_1.37730.37730.2	SmGSAFSSTGLVFVGR	R	D	0.997	3.41	0.72	2		m2: Oxidation (+15.99)	809.901	1617.79	1618.79	2	0.006211	3.837	6395.09	149893	174264	99	114	TRUE
02_1	Uncategorized Sample	BioSample 1	02_1	g.4881 ORF g.4881 m.4881 type:internal len:209 (+) comp241034_c0_seq1:3-632(+)	m.4881	atrina_contam.fasta	22829.2	1	8	13	39	0.000814	0.646	possibly correct	TRUE	02_1.38239.38239.2	SmGSAFSSTGLVFVGR	R	D	0.997	4.38	0.673	2		m2: Oxidation (+15.99)	809.895	1617.78	1618.79	2	-0.006386	-3.945	6467.13	413219	630300	99	114	TRUE
02_1	Uncategorized Sample	BioSample 1	02_1	g.4881 ORF g.4881 m.4881 type:internal len:209 (+) comp241034_c0_seq1:3-632(+)	m.4881	atrina_contam.fasta	22829.2	1	8	13	39	0.000814	0.646	possibly correct	TRUE	02_1.38048.38048.2	SmGSAFSSTGLVFVGR	R	D	0.997	3.99	0.71	2		m2: Oxidation (+15.99)	809.898	1617.78	1618.79	2	-0.000206	-0.1273	6440.15	553579	680330	99	114	TRUE
02_1	Uncategorized Sample	BioSample 1	02_1	g.4881 ORF g.4881 m.4881 type:internal len:209 (+) comp241034_c0_seq1:3-632(+)	m.4881	atrina_contam.fasta	22829.2	1	8	13	39	0.000814	0.646	possibly correct	TRUE	02_1.26086.26086.2	YYcPDcGQDYFVSSEK	R	R	0.997	3.62	0.718	2	c3: Carbamidomethyl (+57.02), c6: Carbamidomethyl (+57.02)		1009.4	2016.79	2017.79	2	0.001945	0.9641	4794.78	1576480	3233330	144	159	TRUE
02_1	Uncategorized Sample	BioSample 1	02_1	g.4881 ORF g.4881 m.4881 type:internal len:209 (+) comp241034_c0_seq1:3-632(+)	m.4881	atrina_contam.fasta	22829.2	1	8	13	39	0.000814	0.646	possibly correct	TRUE	02_1.20976.20976.3	YYcPDcGQDYFVSSEKR	R	D	0.997	4.05	0.758	2	c3: Carbamidomethyl (+57.02), c6: Carbamidomethyl (+57.02)		725.303	2172.89	2173.9	3	0.0001704	0.07838	4114.1	687304	725406	144	160	TRUE
02_1	Uncategorized Sample	BioSample 1	02_1	g.4881 ORF g.4881 m.4881 type:internal len:209 (+) comp241034_c0_seq1:3-632(+)	m.4881	atrina_contam.fasta	22829.2	1	8	13	39	0.000814	0.646	possibly correct	TRUE	02_1.21140.21140.3	YYcPDcGQDYFVSSEKR	R	D	0.997	4.49	0.766	2	c3: Carbamidomethyl (+57.02), c6: Carbamidomethyl (+57.02)		725.303	2172.89	2173.9	3	-0.0003926	-0.1806	4135.54	927130	1147660	144	160	TRUE
02_1	Uncategorized Sample	BioSample 1	02_1	g.15821 ORF g.15821 m.15821 type:5prime_partial len:732 (+) comp255306_c8_seq2:2-2197(+)	m.15821	atrina_contam.fasta	80831.9	1	11	12	15	0.000313	0.226	possibly correct	TRUE	02_1.26654.26654.2	cLALATIDNPPR	R	R	0.997	2.64	0.489	2	c1: Carbamidomethyl (+57.02)		670.853	1339.69	1340.7	2	-0.0005023	-0.3747	4871.65	188508	346790	293	304	TRUE
02_1	Uncategorized Sample	BioSample 1	02_1	g.15821 ORF g.15821 m.15821 type:5prime_partial len:732 (+) comp255306_c8_seq2:2-2197(+)	m.15821	atrina_contam.fasta	80831.9	1	11	12	15	0.000313	0.226	possibly correct	TRUE	02_1.6704.6704.2	EVLNSIKDcR	K	D	0.985	2.34	0.337	2	c9: Carbamidomethyl (+57.02)		617.317	1232.62	1233.63	2	0.0004657	0.3775	2224.08	252099	374364	338	347	TRUE
02_1	Uncategorized Sample	BioSample 1	02_1	g.15821 ORF g.15821 m.15821 type:5prime_partial len:732 (+) comp255306_c8_seq2:2-2197(+)	m.15821	atrina_contam.fasta	80831.9	1	11	12	15	0.000313	0.226	possibly correct	TRUE	02_1.32838.32838.2	IGVFGENESTEGLSYTGR	R	E	0.997	3.55	0.596	2			958.455	1914.9	1915.9	2	-6.8e-05	-0.03549	5714.88	110743	211478	371	388	TRUE
02_1	Uncategorized Sample	BioSample 1	02_1	g.15821 ORF g.15821 m.15821 type:5prime_partial len:732 (+) comp255306_c8_seq2:2-2197(+)	m.15821	atrina_contam.fasta	80831.9	1	11	12	15	0.000313	0.226	possibly correct	TRUE	02_1.32671.32671.2	IGVFGENESTEGLSYTGR	R	E	0.997	4.85	0.664	2			958.457	1914.9	1915.9	2	0.003333	1.74	5691.64	957213	1310390	371	388	TRUE
02_1	Uncategorized Sample	BioSample 1	02_1	g.15821 ORF g.15821 m.15821 type:5prime_partial len:732 (+) comp255306_c8_seq2:2-2197(+)	m.15821	atrina_contam.fasta	80831.9	1	11	12	15	0.000313	0.226	possibly correct	TRUE	02_1.53518.53518.2	ISIPVIILDETLK	K	F	0.99	1.47	0.697	2			727.447	1452.88	1453.89	2	-0.00099	-0.6809	9011.83	91797.7	52576	705	717	TRUE
02_1	Uncategorized Sample	BioSample 1	02_1	g.15821 ORF g.15821 m.15821 type:5prime_partial len:732 (+) comp255306_c8_seq2:2-2197(+)	m.15821	atrina_contam.fasta	80831.9	1	11	12	15	0.000313	0.226	possibly correct	TRUE	02_1.15473.15473.3	KAEIGIAMGSGTAVAK	K	T	0.996	1.71	0.563	2			501.945	1502.81	1503.82	3	-0.000111	-0.07381	3387.36	736188	229288	445	460	TRUE
02_1	Uncategorized Sample	BioSample 1	02_1	g.15821 ORF g.15821 m.15821 type:5prime_partial len:732 (+) comp255306_c8_seq2:2-2197(+)	m.15821	atrina_contam.fasta	80831.9	1	11	12	15	0.000313	0.226	possibly correct	TRUE	02_1.34314.34314.2	SLPSVETLGcTSVIcSDK	R	T	0.997	4.05	0.701	2	c10: Carbamidomethyl (+57.02), c15: Carbamidomethyl (+57.02)		977.47	1952.92	1952.93	2	1.002	-0.6046	5919.73	360576	663389	67	84	TRUE
02_1	Uncategorized Sample	BioSample 1	02_1	g.15821 ORF g.15821 m.15821 type:5prime_partial len:732 (+) comp255306_c8_seq2:2-2197(+)	m.15821	atrina_contam.fasta	80831.9	1	11	12	15	0.000313	0.226	possibly correct	TRUE	02_1.7387.7387.2	SMSVYcTPNKPTR	K	T	0.997	2.86	0.587	2	c6: Carbamidomethyl (+57.02)		770.865	1539.72	1540.72	2	-0.002187	-1.42	2314.83	317632	351262	225	237	TRUE
02_1	Uncategorized Sample	BioSample 1	02_1	g.15821 ORF g.15821 m.15821 type:5prime_partial len:732 (+) comp255306_c8_seq2:2-2197(+)	m.15821	atrina_contam.fasta	80831.9	1	11	12	15	0.000313	0.226	possibly correct	TRUE	02_1.50581.50581.2	TASEmVLADDNFSTIVSAVEEGR	K	A	0.997	3.41	0.659	2		m5: Oxidation (+15.99)	1229.08	2456.14	2457.15	2	0.003749	1.526	8416.95	76165	71462	461	483	TRUE
02_1	Uncategorized Sample	BioSample 1	02_1	g.15821 ORF g.15821 m.15821 type:5prime_partial len:732 (+) comp255306_c8_seq2:2-2197(+)	m.15821	atrina_contam.fasta	80831.9	1	11	12	15	0.000313	0.226	possibly correct	TRUE	02_1.53417.53417.2	TASEMVLADDNFSTIVSAVEEGR	K	A	0.997	3.76	0.678	2			1221.08	2440.14	2441.15	2	-0.006969	-2.855	8992.3	109287	131466	461	483	TRUE
02_1	Uncategorized Sample	BioSample 1	02_1	g.15821 ORF g.15821 m.15821 type:5prime_partial len:732 (+) comp255306_c8_seq2:2-2197(+)	m.15821	atrina_contam.fasta	80831.9	1	11	12	15	0.000313	0.226	possibly correct	TRUE	02_1.53525.53525.2	TASEMVLADDNFSTIVSAVEEGR	K	A	0.997	4.27	0.693	2			1221.08	2440.14	2441.15	2	-0.00392	-1.606	9013.05	138054	135358	461	483	TRUE
02_1	Uncategorized Sample	BioSample 1	02_1	g.15821 ORF g.15821 m.15821 type:5prime_partial len:732 (+) comp255306_c8_seq2:2-2197(+)	m.15821	atrina_contam.fasta	80831.9	1	11	12	15	0.000313	0.226	possibly correct	TRUE	02_1.36657.36657.2	VGEATETALTVLVEK	K	M	0.997	3.5	0.457	2			780.429	1558.84	1559.85	2	-0.001168	-0.7488	6246.21	346410	521539	169	183	TRUE
02_1	Uncategorized Sample	BioSample 1	02_1	g.15821 ORF g.15821 m.15821 type:5prime_partial len:732 (+) comp255306_c8_seq2:2-2197(+)	m.15821	atrina_contam.fasta	80831.9	1	11	12	15	0.000313	0.226	possibly correct	TRUE	02_1.36813.36813.2	VGEATETALTVLVEK	K	M	0.997	4.4	0.508	2			780.43	1558.85	1559.85	2	-0.00043	-0.2757	6267.81	1256420	1566250	169	183	TRUE
02_1	Uncategorized Sample	BioSample 1	02_1	g.15821 ORF g.15821 m.15821 type:5prime_partial len:732 (+) comp255306_c8_seq2:2-2197(+)	m.15821	atrina_contam.fasta	80831.9	1	11	12	15	0.000313	0.226	possibly correct	TRUE	02_1.10148.10148.2	VIVITGDNK	R	A	0.995	2.08	0.524	2			479.782	957.55	958.557	2	-6.6e-05	-0.06885	2681.34	2613560	1448060	353	361	TRUE
02_1	Uncategorized Sample	BioSample 1	02_1	g.15821 ORF g.15821 m.15821 type:5prime_partial len:732 (+) comp255306_c8_seq2:2-2197(+)	m.15821	atrina_contam.fasta	80831.9	1	11	12	15	0.000313	0.226	possibly correct	TRUE	02_1.17359.17359.4	VQGNKVPMSPAIKNEIMK	R	H	0.997	2.95	0.446	2			497.024	1984.07	1984.07	4	1.003	0.3004	3637.89	653534	172116	262	279	TRUE
02_1	Uncategorized Sample	BioSample 1	02_1	g.12644 ORF g.12644 m.12644 type:complete len:906 (+) comp253631_c2_seq1:241-2958(+)	m.12644	atrina_contam.fasta	98012.9	1	10	11	11	0.00023	0.197	possibly correct	TRUE	02_1.4153.4153.2	ADTVADQEQQSETPK	K	N	0.997	2.69	0.654	2			823.878	1645.74	1646.75	2	-0.001372	-0.8332	1886.02	88116.3	260083	253	267	TRUE
02_1	Uncategorized Sample	BioSample 1	02_1	g.12644 ORF g.12644 m.12644 type:complete len:906 (+) comp253631_c2_seq1:241-2958(+)	m.12644	atrina_contam.fasta	98012.9	1	10	11	11	0.00023	0.197	possibly correct	TRUE	02_1.3563.3563.2	EAESSNINEEQPK	K	I	0.997	3.43	0.466	2			737.837	1473.66	1474.67	2	0.000678	0.4598	1808.58	1082000	680400	454	466	TRUE
02_1	Uncategorized Sample	BioSample 1	02_1	g.12644 ORF g.12644 m.12644 type:complete len:906 (+) comp253631_c2_seq1:241-2958(+)	m.12644	atrina_contam.fasta	98012.9	1	10	11	11	0.00023	0.197	possibly correct	TRUE	02_1.15528.15528.2	ESEQAVSDQSEAcETAESPDVTPK	K	D	0.997	5.63	0.771	2	c13: Carbamidomethyl (+57.02)		1297.56	2593.1	2594.1	2	0.0003127	0.1205	3394.7	451246	534295	656	679	TRUE
02_1	Uncategorized Sample	BioSample 1	02_1	g.12644 ORF g.12644 m.12644 type:complete len:906 (+) comp253631_c2_seq1:241-2958(+)	m.12644	atrina_contam.fasta	98012.9	1	10	11	11	0.00023	0.197	possibly correct	TRUE	02_1.13575.13575.2	ESETEVPDNVEETPK	K	S	0.98	2.83	0.401	2			852.389	1702.76	1702.77	2	1.006	1.672	3135.68	548409	860247	852	866	TRUE
02_1	Uncategorized Sample	BioSample 1	02_1	g.12644 ORF g.12644 m.12644 type:complete len:906 (+) comp253631_c2_seq1:241-2958(+)	m.12644	atrina_contam.fasta	98012.9	1	10	11	11	0.00023	0.197	possibly correct	TRUE	02_1.11068.11068.3	ESTDVQSETTVPEKEPSQDVEQK	R	E	0.997	3.38	0.489	2			864.407	2590.2	2590.2	3	1.007	1.687	2802.1	219520	534083	633	655	TRUE
02_1	Uncategorized Sample	BioSample 1	02_1	g.12644 ORF g.12644 m.12644 type:complete len:906 (+) comp253631_c2_seq1:241-2958(+)	m.12644	atrina_contam.fasta	98012.9	1	10	11	11	0.00023	0.197	possibly correct	TRUE	02_1.4558.4558.2	KADEPVVMEK	K	Q	0.997	3.37	0.445	2			573.299	1144.58	1145.59	2	0.003878	3.385	1939.41	466535	563560	134	143	TRUE
02_1	Uncategorized Sample	BioSample 1	02_1	g.12644 ORF g.12644 m.12644 type:complete len:906 (+) comp253631_c2_seq1:241-2958(+)	m.12644	atrina_contam.fasta	98012.9	1	10	11	11	0.00023	0.197	possibly correct	TRUE	02_1.2171.2171.2	KEEAPQEETHVSEK	K	S	0.997	5.14	0.626	2			820.891	1639.77	1640.78	2	-0.000721	-0.4394	1624.23	1116000	1483620	187	200	TRUE
02_1	Uncategorized Sample	BioSample 1	02_1	g.12644 ORF g.12644 m.12644 type:complete len:906 (+) comp253631_c2_seq1:241-2958(+)	m.12644	atrina_contam.fasta	98012.9	1	10	11	11	0.00023	0.197	possibly correct	TRUE	02_1.2164.2164.3	KEEAPQEETHVSEK	K	S	0.997	5.92	0.525	2			547.597	1639.77	1640.78	3	0.000984	0.5997	1623.51	10713600	9152120	187	200	TRUE
02_1	Uncategorized Sample	BioSample 1	02_1	g.12644 ORF g.12644 m.12644 type:complete len:906 (+) comp253631_c2_seq1:241-2958(+)	m.12644	atrina_contam.fasta	98012.9	1	10	11	11	0.00023	0.197	possibly correct	TRUE	02_1.16843.16843.4	RPTEPEEPVQTLSAKPLDETGGQSNK	K	A	0.997	3.28	0.487	2			703.106	2808.39	2808.4	4	1.001	-0.7132	3568.99	407796	738669	18	43	TRUE
02_1	Uncategorized Sample	BioSample 1	02_1	g.12644 ORF g.12644 m.12644 type:complete len:906 (+) comp253631_c2_seq1:241-2958(+)	m.12644	atrina_contam.fasta	98012.9	1	10	11	11	0.00023	0.197	possibly correct	TRUE	02_1.9979.9979.3	TTEAASEETKKESETEVPDNVEETPK	K	S	0.997	4.56	0.499	2			960.453	2878.34	2878.33	3	1.012	3.047	2657.96	779361	846609	841	866	TRUE
02_1	Uncategorized Sample	BioSample 1	02_1	g.12644 ORF g.12644 m.12644 type:complete len:906 (+) comp253631_c2_seq1:241-2958(+)	m.12644	atrina_contam.fasta	98012.9	1	10	11	11	0.00023	0.197	possibly correct	TRUE	02_1.19687.19687.3	VSDEISQPAPVEASAESQSEQTETDAK	K	E	0.997	5.74	0.638	2			945.431	2833.27	2833.29	3	0.9931	-3.397	3945.17	838130	942570	427	453	TRUE
02_1	Uncategorized Sample	BioSample 1	02_1	g.10289 ORF g.10289 m.10289 type:internal len:264 (+) comp251520_c0_seq1:2-796(+)	m.10289	atrina_contam.fasta	29220.1	1	3	3	4	8.35e-05	0.167	possibly correct	TRUE	02_1.51603.51603.2	GSPFIQEIDELVSPK	R	A	0.976	1.45	0.519	2			829.936	1657.86	1658.86	2	0.000296	0.1784	8605.53	85687	37006	105	119	TRUE
02_1	Uncategorized Sample	BioSample 1	02_1	g.10289 ORF g.10289 m.10289 type:internal len:264 (+) comp251520_c0_seq1:2-796(+)	m.10289	atrina_contam.fasta	29220.1	1	3	3	4	8.35e-05	0.167	possibly correct	TRUE	02_1.51696.51696.2	GSPFIQEIDELVSPK	R	A	0.997	2.99	0.471	2			829.935	1657.86	1658.86	2	-0.00025	-0.1507	8626.39	117491	135495	105	119	TRUE
02_1	Uncategorized Sample	BioSample 1	02_1	g.10289 ORF g.10289 m.10289 type:internal len:264 (+) comp251520_c0_seq1:2-796(+)	m.10289	atrina_contam.fasta	29220.1	1	3	3	4	8.35e-05	0.167	possibly correct	TRUE	02_1.32901.32901.2	TEEDDTYTVTYVPEEIGK	K	H	0.997	2.66	0.595	2			1044.98	2087.94	2088.95	2	-0.000922	-0.4414	5723.6	277861	160457	164	181	TRUE
02_1	Uncategorized Sample	BioSample 1	02_1	g.10289 ORF g.10289 m.10289 type:internal len:264 (+) comp251520_c0_seq1:2-796(+)	m.10289	atrina_contam.fasta	29220.1	1	3	3	4	8.35e-05	0.167	possibly correct	TRUE	02_1.34420.34420.2	VWVVYGGSIVR	K	G	0.992	2.19	0.486	2			617.851	1233.69	1234.69	2	-0.000153	-0.1239	5934.5	124448	246516	94	104	TRUE
02_1	Uncategorized Sample	BioSample 1	02_1	g.10283 ORF g.10283 m.10283 type:3prime_partial len:257 (+) comp250560_c0_seq3:208-981(+)	m.10283,m.10284	atrina_contam.fasta	28830	1	1	1	1	2.09e-05	0.0467	possibly correct	TRUE	02_1.34273.34273.2	VTAVLDEPWISK	K	A	0.991	2.53	0.36	2			679.372	1356.73	1357.74	2	0.000103	0.07586	5914.13	214137	230152	26	37	TRUE
02_1	Uncategorized Sample	BioSample 1	02_1	g.10281 ORF g.10281 m.10281 type:5prime_partial len:263 (+) comp251495_c1_seq1:3-791(+)	m.10281	atrina_contam.fasta	28080	0.999	1	1	1	2.09e-05	0.042	possibly correct	TRUE	02_1.22198.22198.2	SIAAATAALVK	K	S	0.987	2.1	0.363	2			508.311	1014.61	1015.61	2	-2.274e-13	-2.239e-10	4274.71	495258	495712	68	78	TRUE
02_1	Uncategorized Sample	BioSample 1	02_1	g.10280 ORF g.10280 m.10280 type:internal len:120 (+) comp251495_c0_seq1:2-364(+)	m.10280	atrina_contam.fasta	12553.5	0.999	1	1	1	2.09e-05	0.117	possibly correct	TRUE	02_1.44656.44656.2	ALEATIEAISQEIK	R	G	0.978	2.14	0.489	2			758.418	1514.82	1515.83	2	0.001721	1.135	7393.05	93379.8	153320	90	103	TRUE
02_1	Uncategorized Sample	BioSample 1	02_1	g.16375 ORF g.16375 m.16375 type:complete len:640 (+) comp255619_c0_seq3:180-2099(+)	m.16375	atrina_contam.fasta	71950.8	1	2	2	2	4.18e-05	0.0485	possibly correct	TRUE	02_1.35298.35298.3	AKFDSALVGLQDALDDERR	K	E	0.985	2.6	0.348	2			707.031	2118.07	2119.08	3	0.000762	0.3596	6056.92	112596	174224	144	162	TRUE
02_1	Uncategorized Sample	BioSample 1	02_1	g.16375 ORF g.16375 m.16375 type:complete len:640 (+) comp255619_c0_seq3:180-2099(+)	m.16375	atrina_contam.fasta	71950.8	1	2	2	2	4.18e-05	0.0485	possibly correct	TRUE	02_1.38896.38896.2	EAQTIMEDLTFR	R	L	0.991	2.02	0.526	2			727.353	1452.69	1453.7	2	-0.000422	-0.2903	6560.58	94543	111421	240	251	TRUE
02_1	Uncategorized Sample	BioSample 1	02_1	g.19400 ORF g.19400 m.19400 type:complete len:444 (+) comp257146_c0_seq1:148-1479(+)	m.19400,m.19401,m.19402	atrina_contam.fasta	49685.2	1	10	12	14	0.000292	0.359	possibly correct	TRUE	02_1.6279.6279.2	AMTIEDAAGKR	K	H	0.997	2.56	0.395	2			581.798	1161.58	1162.59	2	0.000213	0.1832	2165.99	1825560	2250590	242	252	TRUE
02_1	Uncategorized Sample	BioSample 1	02_1	g.19400 ORF g.19400 m.19400 type:complete len:444 (+) comp257146_c0_seq1:148-1479(+)	m.19400,m.19401,m.19402	atrina_contam.fasta	49685.2	1	10	12	14	0.000292	0.359	possibly correct	TRUE	02_1.55942.55942.3	AQGYNVPTTNcPNPVLWMSSLFDR	K	T	0.975	1.69	0.443	2	c11: Carbamidomethyl (+57.02)		923.438	2767.29	2767.3	3	1.003	-0.03358	9661.29	83062.6	54109	275	298	TRUE
02_1	Uncategorized Sample	BioSample 1	02_1	g.19400 ORF g.19400 m.19400 type:complete len:444 (+) comp257146_c0_seq1:148-1479(+)	m.19400,m.19401,m.19402	atrina_contam.fasta	49685.2	1	10	12	14	0.000292	0.359	possibly correct	TRUE	02_1.32463.32463.3	DENELVKPAVEGTQAILK	K	A	0.997	3.35	0.428	2			652.022	1953.05	1954.05	3	0.002833	1.45	5662.56	505439	442548	98	115	TRUE
02_1	Uncategorized Sample	BioSample 1	02_1	g.19400 ORF g.19400 m.19400 type:complete len:444 (+) comp257146_c0_seq1:148-1479(+)	m.19400,m.19401,m.19402	atrina_contam.fasta	49685.2	1	10	12	14	0.000292	0.359	possibly correct	TRUE	02_1.39588.39588.3	LELVEADLTKPESWEPAVK	K	D	0.997	5.02	0.47	2			718.716	2153.13	2154.13	3	0.000526	0.2442	6659.51	1560840	2415750	61	79	TRUE
02_1	Uncategorized Sample	BioSample 1	02_1	g.19400 ORF g.19400 m.19400 type:complete len:444 (+) comp257146_c0_seq1:148-1479(+)	m.19400,m.19401,m.19402	atrina_contam.fasta	49685.2	1	10	12	14	0.000292	0.359	possibly correct	TRUE	02_1.34141.34141.2	LNFPVVDVR	K	D	0.991	2.24	0.379	2			529.803	1057.59	1058.6	2	0.000246	0.2324	5896.02	1879260	704964	225	233	TRUE
02_1	Uncategorized Sample	BioSample 1	02_1	g.19400 ORF g.19400 m.19400 type:complete len:444 (+) comp257146_c0_seq1:148-1479(+)	m.19400,m.19401,m.19402	atrina_contam.fasta	49685.2	1	10	12	14	0.000292	0.359	possibly correct	TRUE	02_1.4423.4423.2	QLQEEGYR	K	V	0.99	2.29	0.436	2			511.749	1021.48	1022.49	2	0.001278	1.25	1921.18	4735720	5595520	26	33	TRUE
02_1	Uncategorized Sample	BioSample 1	02_1	g.19400 ORF g.19400 m.19400 type:complete len:444 (+) comp257146_c0_seq1:148-1479(+)	m.19400,m.19401,m.19402	atrina_contam.fasta	49685.2	1	10	12	14	0.000292	0.359	possibly correct	TRUE	02_1.2027.2027.3	TEEKTEEAKTEESQPEK	K	-	0.997	3.06	0.484	2			664.98	1991.92	1992.92	3	-2.2e-05	-0.01104	1605.51	834707	410442	427	443	TRUE
02_1	Uncategorized Sample	BioSample 1	02_1	g.19400 ORF g.19400 m.19400 type:complete len:444 (+) comp257146_c0_seq1:148-1479(+)	m.19400,m.19401,m.19402	atrina_contam.fasta	49685.2	1	10	12	14	0.000292	0.359	possibly correct	TRUE	02_1.33522.33522.3	TFTEEDWTDPEKLDAYGK	K	S	0.982	1.93	0.501	2			715.659	2143.96	2144.97	3	-0.002379	-1.109	5809.91	262573	180290	146	163	TRUE
02_1	Uncategorized Sample	BioSample 1	02_1	g.19400 ORF g.19400 m.19400 type:complete len:444 (+) comp257146_c0_seq1:148-1479(+)	m.19400,m.19401,m.19402	atrina_contam.fasta	49685.2	1	10	12	14	0.000292	0.359	possibly correct	TRUE	02_1.33657.33657.2	TFTEEDWTDPEKLDAYGK	K	S	0.997	4.75	0.677	2			1073.49	2144.96	2144.97	2	0.9975	-2.447	5829.1	315428	419106	146	163	TRUE
02_1	Uncategorized Sample	BioSample 1	02_1	g.19400 ORF g.19400 m.19400 type:complete len:444 (+) comp257146_c0_seq1:148-1479(+)	m.19400,m.19401,m.19402	atrina_contam.fasta	49685.2	1	10	12	14	0.000292	0.359	possibly correct	TRUE	02_1.33678.33678.3	TFTEEDWTDPEKLDAYGK	K	S	0.997	4.7	0.542	2			715.66	2143.96	2144.97	3	-0.001587	-0.7399	5832.17	2377840	1498370	146	163	TRUE
02_1	Uncategorized Sample	BioSample 1	02_1	g.19400 ORF g.19400 m.19400 type:complete len:444 (+) comp257146_c0_seq1:148-1479(+)	m.19400,m.19401,m.19402	atrina_contam.fasta	49685.2	1	10	12	14	0.000292	0.359	possibly correct	TRUE	02_1.36186.36186.2	VVMTSScVAVGWGPGTDLSK	R	T	0.997	3.51	0.63	2	c7: Carbamidomethyl (+57.02)		1026	2049.99	2050.99	2	-0.0002873	-0.1401	6180.69	213830	193549	126	145	TRUE
02_1	Uncategorized Sample	BioSample 1	02_1	g.19400 ORF g.19400 m.19400 type:complete len:444 (+) comp257146_c0_seq1:148-1479(+)	m.19400,m.19401,m.19402	atrina_contam.fasta	49685.2	1	10	12	14	0.000292	0.359	possibly correct	TRUE	02_1.38599.38599.4	YVIHVASPFPAQAPKDENELVKPAVEGTQAILK	K	A	0.997	3.22	0.489	2			890.981	3559.9	3559.92	4	0.9867	-4.494	6517.58	104027	323692	83	115	TRUE
02_1	Uncategorized Sample	BioSample 1	02_1	g.19400 ORF g.19400 m.19400 type:complete len:444 (+) comp257146_c0_seq1:148-1479(+)	m.19400,m.19401,m.19402	atrina_contam.fasta	49685.2	1	10	12	14	0.000292	0.359	possibly correct	TRUE	02_1.38749.38749.5	YVIHVASPFPAQAPKDENELVKPAVEGTQAILK	K	A	0.997	4.33	0.495	2			712.79	3558.91	3559.92	5	0.003641	1.023	6539.28	1358020	1759740	83	115	TRUE
02_1	Uncategorized Sample	BioSample 1	02_1	g.19400 ORF g.19400 m.19400 type:complete len:444 (+) comp257146_c0_seq1:148-1479(+)	m.19400,m.19401,m.19402	atrina_contam.fasta	49685.2	1	10	12	14	0.000292	0.359	possibly correct	TRUE	02_1.38750.38750.4	YVIHVASPFPAQAPKDENELVKPAVEGTQAILK	K	A	0.997	5.62	0.554	2			890.736	3558.91	3559.92	4	0.00416	1.169	6539.41	1095560	2336840	83	115	TRUE
02_1	Uncategorized Sample	BioSample 1	02_1	g.19433 ORF g.19433 m.19433 type:complete len:218 (+) comp256006_c4_seq1:166-819(+)	m.19433,m.19434	atrina_contam.fasta	23973.3	1	2	2	2	4.18e-05	0.115	possibly correct	TRUE	02_1.29838.29838.2	GSVSGVEVLHFDAMK	R	R	0.997	3.34	0.35	2			788.896	1575.78	1575.78	2	1	-1.427	5304.07	339534	362369	45	59	TRUE
02_1	Uncategorized Sample	BioSample 1	02_1	g.19433 ORF g.19433 m.19433 type:complete len:218 (+) comp256006_c4_seq1:166-819(+)	m.19433,m.19434	atrina_contam.fasta	23973.3	1	2	2	2	4.18e-05	0.115	possibly correct	TRUE	02_1.16855.16855.2	TQPLGEFPNR	R	C	0.997	2.2	0.545	2			579.799	1157.58	1158.59	2	0.000457	0.3944	3570.66	1263520	969242	98	107	TRUE
02_1	Uncategorized Sample	BioSample 1	02_1	g.4793 ORF g.4793 m.4793 type:3prime_partial len:354 (+) comp239776_c2_seq1:136-1200(+)	m.4793	atrina_contam.fasta	39033.9	1	9	10	12	0.000251	0.46	possibly correct	TRUE	02_1.2941.2941.3	APEPVPASQQKPK	R	Q	0.997	3.43	0.523	2			459.589	1375.75	1376.75	3	-7.8e-05	-0.05666	1726.23	2220320	1840570	284	296	TRUE
02_1	Uncategorized Sample	BioSample 1	02_1	g.4793 ORF g.4793 m.4793 type:3prime_partial len:354 (+) comp239776_c2_seq1:136-1200(+)	m.4793	atrina_contam.fasta	39033.9	1	9	10	12	0.000251	0.46	possibly correct	TRUE	02_1.11252.11252.3	ENAPEPLNIGSSHNR	R	S	0.997	3.13	0.415	2			545.601	1633.78	1634.79	3	0.001801	1.102	2828.1	1760990	2983980	137	151	TRUE
02_1	Uncategorized Sample	BioSample 1	02_1	g.4793 ORF g.4793 m.4793 type:3prime_partial len:354 (+) comp239776_c2_seq1:136-1200(+)	m.4793	atrina_contam.fasta	39033.9	1	9	10	12	0.000251	0.46	possibly correct	TRUE	02_1.11300.11300.2	ENAPEPLNIGSSHNR	R	S	0.997	2.98	0.636	2			817.896	1633.78	1634.79	2	-0.002597	-1.589	2834.47	268652	367964	137	151	TRUE
02_1	Uncategorized Sample	BioSample 1	02_1	g.4793 ORF g.4793 m.4793 type:3prime_partial len:354 (+) comp239776_c2_seq1:136-1200(+)	m.4793	atrina_contam.fasta	39033.9	1	9	10	12	0.000251	0.46	possibly correct	TRUE	02_1.36470.36470.3	LQGGVDFSTPLSIQSVNPHSVAER	R	S	0.997	4.67	0.696	2			847.105	2538.29	2538.29	3	1.004	0.5404	6220.16	276568	363681	29	52	TRUE
02_1	Uncategorized Sample	BioSample 1	02_1	g.4793 ORF g.4793 m.4793 type:3prime_partial len:354 (+) comp239776_c2_seq1:136-1200(+)	m.4793	atrina_contam.fasta	39033.9	1	9	10	12	0.000251	0.46	possibly correct	TRUE	02_1.36624.36624.3	LQGGVDFSTPLSIQSVNPHSVAER	R	S	0.997	5.34	0.72	2			846.77	2537.29	2538.29	3	0.001076	0.4239	6241.61	455680	721521	29	52	TRUE
02_1	Uncategorized Sample	BioSample 1	02_1	g.4793 ORF g.4793 m.4793 type:3prime_partial len:354 (+) comp239776_c2_seq1:136-1200(+)	m.4793	atrina_contam.fasta	39033.9	1	9	10	12	0.000251	0.46	possibly correct	TRUE	02_1.10394.10394.2	MSGTYQVVDDK	K	G	0.997	2.86	0.497	2			621.788	1241.56	1242.57	2	0.00115	0.9255	2714.14	265658	368343	217	227	TRUE
02_1	Uncategorized Sample	BioSample 1	02_1	g.4793 ORF g.4793 m.4793 type:3prime_partial len:354 (+) comp239776_c2_seq1:136-1200(+)	m.4793	atrina_contam.fasta	39033.9	1	9	10	12	0.000251	0.46	possibly correct	TRUE	02_1.39324.39324.3	QAVPNVVHAQFNSPIGLYSAENIAK	K	T	0.997	3.3	0.552	2			890.136	2667.39	2667.39	3	1.005	1.001	6621.27	185860	510059	166	190	TRUE
02_1	Uncategorized Sample	BioSample 1	02_1	g.4793 ORF g.4793 m.4793 type:3prime_partial len:354 (+) comp239776_c2_seq1:136-1200(+)	m.4793	atrina_contam.fasta	39033.9	1	9	10	12	0.000251	0.46	possibly correct	TRUE	02_1.34111.34111.3	SGLQPGDGIIYINNEcADQLTHEQAK	R	M	0.997	6	0.644	2	c16: Carbamidomethyl (+57.02)		957.794	2870.36	2871.36	3	0.009514	3.313	5891.67	882750	1726130	53	78	TRUE
02_1	Uncategorized Sample	BioSample 1	02_1	g.4793 ORF g.4793 m.4793 type:3prime_partial len:354 (+) comp239776_c2_seq1:136-1200(+)	m.4793	atrina_contam.fasta	39033.9	1	9	10	12	0.000251	0.46	possibly correct	TRUE	02_1.17431.17431.2	SGNNIVLTVQR	R	G	0.982	2.95	0.256	2			600.838	1199.66	1200.67	2	-0.000574	-0.4781	3647.48	751916	954687	84	94	TRUE
02_1	Uncategorized Sample	BioSample 1	02_1	g.4793 ORF g.4793 m.4793 type:3prime_partial len:354 (+) comp239776_c2_seq1:136-1200(+)	m.4793	atrina_contam.fasta	39033.9	1	9	10	12	0.000251	0.46	possibly correct	TRUE	02_1.7683.7683.2	TATGDELNTVQR	K	T	0.997	3.24	0.521	2			652.825	1303.64	1304.64	2	-0.001522	-1.167	2353.75	718320	687258	120	131	TRUE
02_1	Uncategorized Sample	BioSample 1	02_1	g.4793 ORF g.4793 m.4793 type:3prime_partial len:354 (+) comp239776_c2_seq1:136-1200(+)	m.4793	atrina_contam.fasta	39033.9	1	9	10	12	0.000251	0.46	possibly correct	TRUE	02_1.7841.7841.2	TATGDELNTVQR	K	T	0.997	3.09	0.546	2			652.824	1303.63	1304.64	2	-0.002673	-2.049	2374.67	382601	609144	120	131	TRUE
02_1	Uncategorized Sample	BioSample 1	02_1	g.4793 ORF g.4793 m.4793 type:3prime_partial len:354 (+) comp239776_c2_seq1:136-1200(+)	m.4793	atrina_contam.fasta	39033.9	1	9	10	12	0.000251	0.46	possibly correct	TRUE	02_1.35272.35272.3	TYSAQTDGIQQEMAGLDIDRAPVGTK	K	M	0.997	4.48	0.573	2			922.785	2765.33	2765.34	3	0.9986	-1.492	6053.3	570349	1077810	191	216	TRUE
02_1	Uncategorized Sample	BioSample 1	02_1	g.4777 ORF g.4777 m.4777 type:5prime_partial len:257 (+) comp239752_c0_seq2:2-772(+)	m.4777	atrina_contam.fasta	28848.1	1	5	5	6	0.000125	0.203	possibly correct	TRUE	02_1.45234.45234.2	FccGDGLEELELLR	R	T	0.997	3.08	0.689	2	c2: Carbamidomethyl (+57.02), c3: Carbamidomethyl (+57.02)		855.894	1709.77	1710.78	2	-0.001991	-1.164	7487.24	238559	216009	116	129	TRUE
02_1	Uncategorized Sample	BioSample 1	02_1	g.4777 ORF g.4777 m.4777 type:5prime_partial len:257 (+) comp239752_c0_seq2:2-772(+)	m.4777	atrina_contam.fasta	28848.1	1	5	5	6	0.000125	0.203	possibly correct	TRUE	02_1.22893.22893.2	GMQFSAFR	R	K	0.99	1.85	0.596	2			472.227	942.439	943.445	2	0.000478	0.5067	4366.52	610835	130899	136	143	TRUE
02_1	Uncategorized Sample	BioSample 1	02_1	g.4777 ORF g.4777 m.4777 type:5prime_partial len:257 (+) comp239752_c0_seq2:2-772(+)	m.4777	atrina_contam.fasta	28848.1	1	5	5	6	0.000125	0.203	possibly correct	TRUE	02_1.37856.37856.2	IPSVLQFVQK	K	S	0.996	1.79	0.57	2			579.848	1157.68	1158.69	2	-0.000351	-0.3029	6413.2	178127	124937	102	111	TRUE
02_1	Uncategorized Sample	BioSample 1	02_1	g.4777 ORF g.4777 m.4777 type:5prime_partial len:257 (+) comp239752_c0_seq2:2-772(+)	m.4777	atrina_contam.fasta	28848.1	1	5	5	6	0.000125	0.203	possibly correct	TRUE	02_1.38015.38015.2	IPSVLQFVQK	K	S	0.997	1.94	0.573	2			579.848	1157.68	1158.69	2	0.000507	0.4376	6435.42	825149	158102	102	111	TRUE
02_1	Uncategorized Sample	BioSample 1	02_1	g.4777 ORF g.4777 m.4777 type:5prime_partial len:257 (+) comp239752_c0_seq2:2-772(+)	m.4777	atrina_contam.fasta	28848.1	1	5	5	6	0.000125	0.203	possibly correct	TRUE	02_1.28966.28966.2	LVPEGDFFK	K	S	0.984	1.72	0.453	2			526.277	1050.54	1051.55	2	0.000664	0.6315	5187.72	1417440	461267	54	62	TRUE
02_1	Uncategorized Sample	BioSample 1	02_1	g.4777 ORF g.4777 m.4777 type:5prime_partial len:257 (+) comp239752_c0_seq2:2-772(+)	m.4777	atrina_contam.fasta	28848.1	1	5	5	6	0.000125	0.203	possibly correct	TRUE	02_1.30935.30935.2	LYcNAFQEFAK	K	T	0.997	2.58	0.529	2	c3: Carbamidomethyl (+57.02)		695.828	1389.64	1390.65	2	0.001902	1.367	5454.74	275041	280882	176	186	TRUE
02_1	Uncategorized Sample	BioSample 1	02_1	g.16895 ORF g.16895 m.16895 type:complete len:233 (+) comp255879_c2_seq1:286-984(+)	m.16895	atrina_contam.fasta	25267.5	1	3	4	5	0.000104	0.207	possibly correct	TRUE	02_1.30832.30832.3	DKPGcTGAAQDIPSEIYTEPcLTK	K	F	0.997	4.63	0.539	2	c5: Carbamidomethyl (+57.02), c21: Carbamidomethyl (+57.02)		884.749	2651.22	2651.23	3	0.9986	-1.568	5440.78	608196	1416230	165	188	TRUE
02_1	Uncategorized Sample	BioSample 1	02_1	g.16895 ORF g.16895 m.16895 type:complete len:233 (+) comp255879_c2_seq1:286-984(+)	m.16895	atrina_contam.fasta	25267.5	1	3	4	5	0.000104	0.207	possibly correct	TRUE	02_1.12722.12722.2	SHQDGDVWDTVQK	K	E	0.997	2.81	0.62	2			757.847	1513.68	1514.69	2	-0.000195	-0.1287	3022.85	425432	457064	124	136	TRUE
02_1	Uncategorized Sample	BioSample 1	02_1	g.16895 ORF g.16895 m.16895 type:complete len:233 (+) comp255879_c2_seq1:286-984(+)	m.16895	atrina_contam.fasta	25267.5	1	3	4	5	0.000104	0.207	possibly correct	TRUE	02_1.12555.12555.2	SHQDGDVWDTVQK	K	E	0.997	4.74	0.724	2			758.346	1514.68	1514.69	2	0.9981	-3.068	3000.61	436896	1134900	124	136	TRUE
02_1	Uncategorized Sample	BioSample 1	02_1	g.16895 ORF g.16895 m.16895 type:complete len:233 (+) comp255879_c2_seq1:286-984(+)	m.16895	atrina_contam.fasta	25267.5	1	3	4	5	0.000104	0.207	possibly correct	TRUE	02_1.13940.13940.3	VEETVKDLMQK	K	T	0.992	2.61	0.348	2			440.568	1318.68	1319.69	3	0.001123	0.851	3184.74	632387	332852	110	120	TRUE
02_1	Uncategorized Sample	BioSample 1	02_1	g.16895 ORF g.16895 m.16895 type:complete len:233 (+) comp255879_c2_seq1:286-984(+)	m.16895	atrina_contam.fasta	25267.5	1	3	4	5	0.000104	0.207	possibly correct	TRUE	02_1.14002.14002.2	VEETVKDLMQK	K	T	0.997	4.35	0.461	2			660.347	1318.68	1319.69	2	-0.000241	-0.1826	3192.91	1269850	1445580	110	120	TRUE
02_1	Uncategorized Sample	BioSample 1	02_1	g.467 ORF g.467 m.467 type:complete len:392 (+) comp163266_c0_seq2:292-1467(+)	m.467	atrina_contam.fasta	42880.1	1	23	36	90	0.00188	0.749	possibly correct	TRUE	02_1.22396.22396.2	ADDLDREAAGTVSLQYGTNR	R	F	0.994	3.14	0.477	2			1077.02	2152.02	2152.03	2	1.001	-0.8131	4300.86	658503	1435750	323	342	TRUE
02_1	Uncategorized Sample	BioSample 1	02_1	g.467 ORF g.467 m.467 type:complete len:392 (+) comp163266_c0_seq2:292-1467(+)	m.467	atrina_contam.fasta	42880.1	1	23	36	90	0.00188	0.749	possibly correct	TRUE	02_1.22340.22340.3	ADDLDREAAGTVSLQYGTNR	R	F	0.997	3.88	0.498	2			718.014	2151.02	2152.03	3	-0.00026	-0.1208	4293.6	524312	593517	323	342	TRUE
02_1	Uncategorized Sample	BioSample 1	02_1	g.467 ORF g.467 m.467 type:complete len:392 (+) comp163266_c0_seq2:292-1467(+)	m.467	atrina_contam.fasta	42880.1	1	23	36	90	0.00188	0.749	possibly correct	TRUE	02_1.22498.22498.3	ADDLDREAAGTVSLQYGTNR	R	F	0.997	4.55	0.535	2			718.013	2151.02	2152.03	3	-0.000862	-0.4006	4314.34	2063490	2130920	323	342	TRUE
02_1	Uncategorized Sample	BioSample 1	02_1	g.467 ORF g.467 m.467 type:complete len:392 (+) comp163266_c0_seq2:292-1467(+)	m.467	atrina_contam.fasta	42880.1	1	23	36	90	0.00188	0.749	possibly correct	TRUE	02_1.22964.22964.2	ADDLVQDGQSTIGLQAGSNK	R	F	0.997	4.83	0.557	2			1008.99	2015.97	2016.98	2	-0.001612	-0.7992	4375.91	745427	623108	202	221	TRUE
02_1	Uncategorized Sample	BioSample 1	02_1	g.467 ORF g.467 m.467 type:complete len:392 (+) comp163266_c0_seq2:292-1467(+)	m.467	atrina_contam.fasta	42880.1	1	23	36	90	0.00188	0.749	possibly correct	TRUE	02_1.25172.25172.2	ADDLVQDGQSTIGLQAGSNK	R	F	0.997	4.94	0.556	2			1009	2015.98	2016.98	2	0.000407	0.2018	4671.57	4297130	4279550	202	221	TRUE
02_1	Uncategorized Sample	BioSample 1	02_1	g.467 ORF g.467 m.467 type:complete len:392 (+) comp163266_c0_seq2:292-1467(+)	m.467	atrina_contam.fasta	42880.1	1	23	36	90	0.00188	0.749	possibly correct	TRUE	02_1.25040.25040.3	ADDLVQDGQSTIGLQAGSNK	R	F	0.997	3.84	0.524	2			673.336	2016.99	2016.98	3	1.01	3.505	4653.49	360760	666289	202	221	TRUE
02_1	Uncategorized Sample	BioSample 1	02_1	g.467 ORF g.467 m.467 type:complete len:392 (+) comp163266_c0_seq2:292-1467(+)	m.467	atrina_contam.fasta	42880.1	1	23	36	90	0.00188	0.749	possibly correct	TRUE	02_1.25014.25014.2	ADDLVQDGQSTIGLQAGSNK	R	F	0.997	4.95	0.582	2			1008.99	2015.98	2016.98	2	-0.001246	-0.6178	4649.97	488202	816190	202	221	TRUE
02_1	Uncategorized Sample	BioSample 1	02_1	g.467 ORF g.467 m.467 type:complete len:392 (+) comp163266_c0_seq2:292-1467(+)	m.467	atrina_contam.fasta	42880.1	1	23	36	90	0.00188	0.749	possibly correct	TRUE	02_1.25204.25204.3	ADDLVQDGQSTIGLQAGSNK	R	F	0.997	4.12	0.563	2			672.998	2015.97	2016.98	3	-0.003005	-1.49	4675.73	744339	780492	202	221	TRUE
02_1	Uncategorized Sample	BioSample 1	02_1	g.467 ORF g.467 m.467 type:complete len:392 (+) comp163266_c0_seq2:292-1467(+)	m.467	atrina_contam.fasta	42880.1	1	23	36	90	0.00188	0.749	possibly correct	TRUE	02_1.9842.9842.2	ADEYDKQSSGDISLQSGTNK	R	F	0.997	5.33	0.635	2			1071.99	2141.97	2142.98	2	0.001278	0.5964	2639.79	405284	425924	242	261	TRUE
02_1	Uncategorized Sample	BioSample 1	02_1	g.467 ORF g.467 m.467 type:complete len:392 (+) comp163266_c0_seq2:292-1467(+)	m.467	atrina_contam.fasta	42880.1	1	23	36	90	0.00188	0.749	possibly correct	TRUE	02_1.15400.15400.2	EAAGTVSLQYGTNR	R	F	0.997	3.4	0.475	2			733.868	1465.72	1466.72	2	0.005078	3.462	3377.35	685411	2083390	329	342	TRUE
02_1	Uncategorized Sample	BioSample 1	02_1	g.467 ORF g.467 m.467 type:complete len:392 (+) comp163266_c0_seq2:292-1467(+)	m.467	atrina_contam.fasta	42880.1	1	23	36	90	0.00188	0.749	possibly correct	TRUE	02_1.25209.25209.3	ELLSEDIGEGSmAVEK	K	N	0.997	2.69	0.444	2		m12: Oxidation (+15.99)	574.942	1721.81	1722.81	3	0.002062	1.197	4676.38	419549	262033	36	51	TRUE
02_1	Uncategorized Sample	BioSample 1	02_1	g.467 ORF g.467 m.467 type:complete len:392 (+) comp163266_c0_seq2:292-1467(+)	m.467	atrina_contam.fasta	42880.1	1	23	36	90	0.00188	0.749	possibly correct	TRUE	02_1.27225.27225.2	ELLSEDIGEGSmAVEK	K	N	0.997	3.67	0.497	2		m12: Oxidation (+15.99)	861.91	1721.81	1722.81	2	0.002609	1.514	4950.18	683334	1114790	36	51	TRUE
02_1	Uncategorized Sample	BioSample 1	02_1	g.467 ORF g.467 m.467 type:complete len:392 (+) comp163266_c0_seq2:292-1467(+)	m.467	atrina_contam.fasta	42880.1	1	23	36	90	0.00188	0.749	possibly correct	TRUE	02_1.26743.26743.2	ELLSEDIGEGSmAVEK	K	N	0.997	3.88	0.492	2		m12: Oxidation (+15.99)	861.91	1721.81	1722.81	2	0.00258	1.498	4883.99	589201	835814	36	51	TRUE
02_1	Uncategorized Sample	BioSample 1	02_1	g.467 ORF g.467 m.467 type:complete len:392 (+) comp163266_c0_seq2:292-1467(+)	m.467	atrina_contam.fasta	42880.1	1	23	36	90	0.00188	0.749	possibly correct	TRUE	02_1.30550.30550.2	ELLSEDIGEGSMAVEK	K	N	0.997	4.28	0.47	2			853.912	1705.81	1706.82	2	0.000918	0.5378	5402.75	1148850	2452300	36	51	TRUE
02_1	Uncategorized Sample	BioSample 1	02_1	g.467 ORF g.467 m.467 type:complete len:392 (+) comp163266_c0_seq2:292-1467(+)	m.467	atrina_contam.fasta	42880.1	1	23	36	90	0.00188	0.749	possibly correct	TRUE	02_1.25237.25237.2	ELLSEDIGEGSmAVEK	K	N	0.997	3.93	0.513	2		m12: Oxidation (+15.99)	861.909	1721.8	1722.81	2	0.000328	0.1904	4680.26	2649440	1899590	36	51	TRUE
02_1	Uncategorized Sample	BioSample 1	02_1	g.467 ORF g.467 m.467 type:complete len:392 (+) comp163266_c0_seq2:292-1467(+)	m.467	atrina_contam.fasta	42880.1	1	23	36	90	0.00188	0.749	possibly correct	TRUE	02_1.25079.25079.2	ELLSEDIGEGSmAVEK	K	N	0.997	3.49	0.565	2		m12: Oxidation (+15.99)	861.908	1721.8	1722.81	2	-0.002155	-1.251	4658.92	471437	717694	36	51	TRUE
02_1	Uncategorized Sample	BioSample 1	02_1	g.467 ORF g.467 m.467 type:complete len:392 (+) comp163266_c0_seq2:292-1467(+)	m.467	atrina_contam.fasta	42880.1	1	23	36	90	0.00188	0.749	possibly correct	TRUE	02_1.26903.26903.2	ELLSEDIGEGSmAVEK	K	N	0.997	3.76	0.541	2		m12: Oxidation (+15.99)	861.909	1721.8	1722.81	2	-0.000217	-0.126	4906.01	886491	1196560	36	51	TRUE
02_1	Uncategorized Sample	BioSample 1	02_1	g.467 ORF g.467 m.467 type:complete len:392 (+) comp163266_c0_seq2:292-1467(+)	m.467	atrina_contam.fasta	42880.1	1	23	36	90	0.00188	0.749	possibly correct	TRUE	02_1.27066.27066.2	ELLSEDIGEGSmAVEK	K	N	0.997	4.27	0.549	2		m12: Oxidation (+15.99)	861.908	1721.8	1722.81	2	-0.000887	-0.5149	4928.48	1003250	1122100	36	51	TRUE
02_1	Uncategorized Sample	BioSample 1	02_1	g.467 ORF g.467 m.467 type:complete len:392 (+) comp163266_c0_seq2:292-1467(+)	m.467	atrina_contam.fasta	42880.1	1	23	36	90	0.00188	0.749	possibly correct	TRUE	02_1.30709.30709.2	ELLSEDIGEGSMAVEK	K	N	0.997	4.18	0.571	2			853.911	1705.81	1706.82	2	-0.000421	-0.2467	5424.45	3448270	2636780	36	51	TRUE
02_1	Uncategorized Sample	BioSample 1	02_1	g.467 ORF g.467 m.467 type:complete len:392 (+) comp163266_c0_seq2:292-1467(+)	m.467	atrina_contam.fasta	42880.1	1	23	36	90	0.00188	0.749	possibly correct	TRUE	02_1.55529.55529.2	GANAYGVPYNSLFQTVDLFEGR	K	N	0.997	3.23	0.613	2			1210.08	2418.15	2418.17	2	0.9832	-8.056	9536.91	94655.1	182390	103	124	TRUE
02_1	Uncategorized Sample	BioSample 1	02_1	g.467 ORF g.467 m.467 type:complete len:392 (+) comp163266_c0_seq2:292-1467(+)	m.467	atrina_contam.fasta	42880.1	1	23	36	90	0.00188	0.749	possibly correct	TRUE	02_1.54681.54681.3	GANAYGVPYNSLFQTVDLFEGR	K	N	0.997	3.04	0.582	2			806.729	2417.17	2418.17	3	0.001111	0.4594	9285.82	156887	115612	103	124	TRUE
02_1	Uncategorized Sample	BioSample 1	02_1	g.467 ORF g.467 m.467 type:complete len:392 (+) comp163266_c0_seq2:292-1467(+)	m.467	atrina_contam.fasta	42880.1	1	23	36	90	0.00188	0.749	possibly correct	TRUE	02_1.54675.54675.2	GANAYGVPYNSLFQTVDLFEGR	K	N	0.997	5.08	0.537	2			1210.09	2418.17	2418.17	2	1.002	-0.4756	9284.23	148693	400971	103	124	TRUE
02_1	Uncategorized Sample	BioSample 1	02_1	g.467 ORF g.467 m.467 type:complete len:392 (+) comp163266_c0_seq2:292-1467(+)	m.467	atrina_contam.fasta	42880.1	1	23	36	90	0.00188	0.749	possibly correct	TRUE	02_1.55276.55276.2	GANAYGVPYNSLFQTVDLFEGR	K	N	0.997	4.22	0.609	2			1210.08	2418.15	2418.17	2	0.9835	-7.949	9458.2	156044	295774	103	124	TRUE
02_1	Uncategorized Sample	BioSample 1	02_1	g.467 ORF g.467 m.467 type:complete len:392 (+) comp163266_c0_seq2:292-1467(+)	m.467	atrina_contam.fasta	42880.1	1	23	36	90	0.00188	0.749	possibly correct	TRUE	02_1.54758.54758.3	GANAYGVPYNSLFQTVDLFEGR	K	N	0.997	3.87	0.568	2			806.729	2417.16	2418.17	3	-0.000571	-0.2361	9306.2	420801	379894	103	124	TRUE
02_1	Uncategorized Sample	BioSample 1	02_1	g.467 ORF g.467 m.467 type:complete len:392 (+) comp163266_c0_seq2:292-1467(+)	m.467	atrina_contam.fasta	42880.1	1	23	36	90	0.00188	0.749	possibly correct	TRUE	02_1.54753.54753.2	GANAYGVPYNSLFQTVDLFEGR	K	N	0.997	5.31	0.665	2			1209.59	2417.16	2418.17	2	-0.001847	-0.7638	9304.63	1154780	2882750	103	124	TRUE
02_1	Uncategorized Sample	BioSample 1	02_1	g.467 ORF g.467 m.467 type:complete len:392 (+) comp163266_c0_seq2:292-1467(+)	m.467	atrina_contam.fasta	42880.1	1	23	36	90	0.00188	0.749	possibly correct	TRUE	02_1.4892.4892.2	GMTAFGAHR	R	H	0.98	2.13	0.334	2			474.23	946.445	947.452	2	0.000443	0.4676	1982.64	3121880	3211130	348	356	TRUE
02_1	Uncategorized Sample	BioSample 1	02_1	g.467 ORF g.467 m.467 type:complete len:392 (+) comp163266_c0_seq2:292-1467(+)	m.467	atrina_contam.fasta	42880.1	1	23	36	90	0.00188	0.749	possibly correct	TRUE	02_1.9028.9028.2	GmTGFGAVR	K	H	0.977	1.96	0.422	2		m2: Oxidation (+15.99)	456.224	910.433	911.44	2	-0.000537	-0.5892	2532.85	530816	646499	227	235	TRUE
02_1	Uncategorized Sample	BioSample 1	02_1	g.467 ORF g.467 m.467 type:complete len:392 (+) comp163266_c0_seq2:292-1467(+)	m.467	atrina_contam.fasta	42880.1	1	23	36	90	0.00188	0.749	possibly correct	TRUE	02_1.14164.14164.2	GMTGFGAVR	K	H	0.984	1.78	0.43	2			448.227	894.438	895.446	2	0.000198	0.2211	3214.23	1982780	3589350	227	235	TRUE
02_1	Uncategorized Sample	BioSample 1	02_1	g.467 ORF g.467 m.467 type:complete len:392 (+) comp163266_c0_seq2:292-1467(+)	m.467	atrina_contam.fasta	42880.1	1	23	36	90	0.00188	0.749	possibly correct	TRUE	02_1.9183.9183.2	GmTGFGAVR	K	H	0.987	2.27	0.389	2		m2: Oxidation (+15.99)	456.224	910.433	911.44	2	-0.000121	-0.1328	2553.56	2820600	1658630	227	235	TRUE
02_1	Uncategorized Sample	BioSample 1	02_1	g.467 ORF g.467 m.467 type:complete len:392 (+) comp163266_c0_seq2:292-1467(+)	m.467	atrina_contam.fasta	42880.1	1	23	36	90	0.00188	0.749	possibly correct	TRUE	02_1.9346.9346.2	GmTGFGAVR	K	H	0.991	2.26	0.399	2		m2: Oxidation (+15.99)	456.224	910.433	911.44	2	0.000144	0.158	2574.83	2073190	1738450	227	235	TRUE
02_1	Uncategorized Sample	BioSample 1	02_1	g.467 ORF g.467 m.467 type:complete len:392 (+) comp163266_c0_seq2:292-1467(+)	m.467	atrina_contam.fasta	42880.1	1	23	36	90	0.00188	0.749	possibly correct	TRUE	02_1.9865.9865.2	GmTGFGAVR	K	H	0.993	2.24	0.446	2		m2: Oxidation (+15.99)	456.224	910.434	911.44	2	0.00032	0.3511	2642.94	960732	688356	227	235	TRUE
02_1	Uncategorized Sample	BioSample 1	02_1	g.467 ORF g.467 m.467 type:complete len:392 (+) comp163266_c0_seq2:292-1467(+)	m.467	atrina_contam.fasta	42880.1	1	23	36	90	0.00188	0.749	possibly correct	TRUE	02_1.7035.7035.3	HAAHFTYEQLK	K	Q	0.996	2.5	0.437	2			448.895	1343.66	1344.67	3	-6.3e-05	-0.04685	2267.48	2153880	1579320	158	168	TRUE
02_1	Uncategorized Sample	BioSample 1	02_1	g.467 ORF g.467 m.467 type:complete len:392 (+) comp163266_c0_seq2:292-1467(+)	m.467	atrina_contam.fasta	42880.1	1	23	36	90	0.00188	0.749	possibly correct	TRUE	02_1.6942.6942.2	HAAHFTYEQLK	K	Q	0.997	2.83	0.547	2			672.838	1343.66	1344.67	2	-0.000539	-0.4008	2255.41	539457	951208	158	168	TRUE
02_1	Uncategorized Sample	BioSample 1	02_1	g.467 ORF g.467 m.467 type:complete len:392 (+) comp163266_c0_seq2:292-1467(+)	m.467	atrina_contam.fasta	42880.1	1	23	36	90	0.00188	0.749	possibly correct	TRUE	02_1.6781.6781.2	HAAHFTYEQLK	K	Q	0.997	3.37	0.557	2			672.838	1343.66	1344.67	2	-0.000989	-0.7355	2234.02	963320	1706080	158	168	TRUE
02_1	Uncategorized Sample	BioSample 1	02_1	g.467 ORF g.467 m.467 type:complete len:392 (+) comp163266_c0_seq2:292-1467(+)	m.467	atrina_contam.fasta	42880.1	1	23	36	90	0.00188	0.749	possibly correct	TRUE	02_1.6716.6716.3	HAAHFTYEQLK	K	Q	0.997	3.78	0.541	2			448.895	1343.66	1344.67	3	-0.000501	-0.3726	2225.66	1992410	2475270	158	168	TRUE
02_1	Uncategorized Sample	BioSample 1	02_1	g.467 ORF g.467 m.467 type:complete len:392 (+) comp163266_c0_seq2:292-1467(+)	m.467	atrina_contam.fasta	42880.1	1	23	36	90	0.00188	0.749	possibly correct	TRUE	02_1.6874.6874.3	HAAHFTYEQLK	K	Q	0.997	3.75	0.586	2			448.895	1343.66	1344.67	3	-0.000428	-0.3183	2246.23	25404500	11346900	158	168	TRUE
02_1	Uncategorized Sample	BioSample 1	02_1	g.467 ORF g.467 m.467 type:complete len:392 (+) comp163266_c0_seq2:292-1467(+)	m.467	atrina_contam.fasta	42880.1	1	23	36	90	0.00188	0.749	possibly correct	TRUE	02_1.7158.7158.2	HISDIRADEYATDSK	R	S	0.991	2.39	0.56	2			860.408	1718.8	1720.81	2	-1.006	-1.686	2283.76	645219	649222	277	291	TRUE
02_1	Uncategorized Sample	BioSample 1	02_1	g.467 ORF g.467 m.467 type:complete len:392 (+) comp163266_c0_seq2:292-1467(+)	m.467	atrina_contam.fasta	42880.1	1	23	36	90	0.00188	0.749	possibly correct	TRUE	02_1.7085.7085.3	HISDIRADEYATDSK	R	S	0.997	3.73	0.483	2			574.276	1719.81	1720.81	3	0.000501	0.2911	2274.13	1296290	1425980	277	291	TRUE
02_1	Uncategorized Sample	BioSample 1	02_1	g.467 ORF g.467 m.467 type:complete len:392 (+) comp163266_c0_seq2:292-1467(+)	m.467	atrina_contam.fasta	42880.1	1	23	36	90	0.00188	0.749	possibly correct	TRUE	02_1.8703.8703.2	INNQETPFK	K	Q	0.984	2.62	0.394	2			545.781	1089.55	1090.55	2	0.001062	0.9738	2489.95	1947900	777013	84	92	TRUE
02_1	Uncategorized Sample	BioSample 1	02_1	g.467 ORF g.467 m.467 type:complete len:392 (+) comp163266_c0_seq2:292-1467(+)	m.467	atrina_contam.fasta	42880.1	1	23	36	90	0.00188	0.749	possibly correct	TRUE	02_1.8538.8538.2	INNQETPFK	K	Q	0.993	2.85	0.381	2			545.78	1089.55	1090.55	2	0.000285	0.2613	2468.19	29404200	18643000	84	92	TRUE
02_1	Uncategorized Sample	BioSample 1	02_1	g.467 ORF g.467 m.467 type:complete len:392 (+) comp163266_c0_seq2:292-1467(+)	m.467	atrina_contam.fasta	42880.1	1	23	36	90	0.00188	0.749	possibly correct	TRUE	02_1.13380.13380.2	LKINNQETPFK	K	Q	0.997	2.92	0.337	2			666.37	1330.73	1331.73	2	0.000592	0.4445	3109.5	849684	990317	82	92	TRUE
02_1	Uncategorized Sample	BioSample 1	02_1	g.467 ORF g.467 m.467 type:complete len:392 (+) comp163266_c0_seq2:292-1467(+)	m.467	atrina_contam.fasta	42880.1	1	23	36	90	0.00188	0.749	possibly correct	TRUE	02_1.13559.13559.2	LYENTSNLPPK	K	C	0.977	2.32	0.375	2			638.332	1274.65	1275.66	2	-0.00088	-0.6898	3133.48	486093	492086	66	76	TRUE
02_1	Uncategorized Sample	BioSample 1	02_1	g.467 ORF g.467 m.467 type:complete len:392 (+) comp163266_c0_seq2:292-1467(+)	m.467	atrina_contam.fasta	42880.1	1	23	36	90	0.00188	0.749	possibly correct	TRUE	02_1.13717.13717.2	LYENTSNLPPK	K	C	0.987	2.42	0.481	2			638.332	1274.65	1275.66	2	-0.00155	-1.215	3154.63	259556	433628	66	76	TRUE
02_1	Uncategorized Sample	BioSample 1	02_1	g.467 ORF g.467 m.467 type:complete len:392 (+) comp163266_c0_seq2:292-1467(+)	m.467	atrina_contam.fasta	42880.1	1	23	36	90	0.00188	0.749	possibly correct	TRUE	02_1.13381.13381.2	LYENTSNLPPK	K	C	0.995	2.16	0.502	2			638.333	1274.65	1275.66	2	0.000359	0.2814	3109.63	595962	716117	66	76	TRUE
02_1	Uncategorized Sample	BioSample 1	02_1	g.467 ORF g.467 m.467 type:complete len:392 (+) comp163266_c0_seq2:292-1467(+)	m.467	atrina_contam.fasta	42880.1	1	23	36	90	0.00188	0.749	possibly correct	TRUE	02_1.13044.13044.2	LYENTSNLPPK	K	C	0.996	2.57	0.362	2			638.333	1274.65	1275.66	2	0.000154	0.1207	3065.24	620195	985279	66	76	TRUE
02_1	Uncategorized Sample	BioSample 1	02_1	g.467 ORF g.467 m.467 type:complete len:392 (+) comp163266_c0_seq2:292-1467(+)	m.467	atrina_contam.fasta	42880.1	1	23	36	90	0.00188	0.749	possibly correct	TRUE	02_1.11746.11746.2	LYENTSNLPPK	K	C	0.997	2.8	0.495	2			638.332	1274.65	1275.66	2	-0.002197	-1.722	2893.81	551310	793243	66	76	TRUE
02_1	Uncategorized Sample	BioSample 1	02_1	g.467 ORF g.467 m.467 type:complete len:392 (+) comp163266_c0_seq2:292-1467(+)	m.467	atrina_contam.fasta	42880.1	1	23	36	90	0.00188	0.749	possibly correct	TRUE	02_1.12883.12883.2	LYENTSNLPPK	K	C	0.997	2.68	0.373	2			638.333	1274.65	1275.66	2	9.9e-05	0.07761	3044.23	1299790	1308040	66	76	TRUE
02_1	Uncategorized Sample	BioSample 1	02_1	g.467 ORF g.467 m.467 type:complete len:392 (+) comp163266_c0_seq2:292-1467(+)	m.467	atrina_contam.fasta	42880.1	1	23	36	90	0.00188	0.749	possibly correct	TRUE	02_1.13200.13200.2	LYENTSNLPPK	K	C	0.997	2.58	0.481	2			638.332	1274.65	1275.66	2	-0.000436	-0.3418	3085.85	921603	831134	66	76	TRUE
02_1	Uncategorized Sample	BioSample 1	02_1	g.467 ORF g.467 m.467 type:complete len:392 (+) comp163266_c0_seq2:292-1467(+)	m.467	atrina_contam.fasta	42880.1	1	23	36	90	0.00188	0.749	possibly correct	TRUE	02_1.12243.12243.2	LYENTSNLPPK	K	C	0.997	2.77	0.438	2			638.332	1274.65	1275.66	2	-0.000519	-0.4068	2959.05	1295930	1457930	66	76	TRUE
02_1	Uncategorized Sample	BioSample 1	02_1	g.467 ORF g.467 m.467 type:complete len:392 (+) comp163266_c0_seq2:292-1467(+)	m.467	atrina_contam.fasta	42880.1	1	23	36	90	0.00188	0.749	possibly correct	TRUE	02_1.12400.12400.2	LYENTSNLPPK	K	C	0.997	2.85	0.407	2			638.333	1274.65	1275.66	2	0.000319	0.2501	2979.98	1370240	1567540	66	76	TRUE
02_1	Uncategorized Sample	BioSample 1	02_1	g.467 ORF g.467 m.467 type:complete len:392 (+) comp163266_c0_seq2:292-1467(+)	m.467	atrina_contam.fasta	42880.1	1	23	36	90	0.00188	0.749	possibly correct	TRUE	02_1.12083.12083.2	LYENTSNLPPK	K	C	0.997	3.05	0.523	2			638.333	1274.65	1275.66	2	-4.8e-05	-0.03763	2938.15	1101900	1399450	66	76	TRUE
02_1	Uncategorized Sample	BioSample 1	02_1	g.467 ORF g.467 m.467 type:complete len:392 (+) comp163266_c0_seq2:292-1467(+)	m.467	atrina_contam.fasta	42880.1	1	23	36	90	0.00188	0.749	possibly correct	TRUE	02_1.11909.11909.2	LYENTSNLPPK	K	C	0.997	3.11	0.523	2			638.333	1274.65	1275.66	2	0.000759	0.595	2915.44	981609	1177870	66	76	TRUE
02_1	Uncategorized Sample	BioSample 1	02_1	g.467 ORF g.467 m.467 type:complete len:392 (+) comp163266_c0_seq2:292-1467(+)	m.467	atrina_contam.fasta	42880.1	1	23	36	90	0.00188	0.749	possibly correct	TRUE	02_1.22854.22854.2	NLKDGVLLLK	K	L	0.99	2.43	0.203	2			556.856	1111.7	1112.7	2	-5.6e-05	-0.05033	4361.22	1445810	388147	52	61	TRUE
02_1	Uncategorized Sample	BioSample 1	02_1	g.467 ORF g.467 m.467 type:complete len:392 (+) comp163266_c0_seq2:292-1467(+)	m.467	atrina_contam.fasta	42880.1	1	23	36	90	0.00188	0.749	possibly correct	TRUE	02_1.22520.22520.2	NLKDGVLLLK	K	L	0.997	3.39	0.438	2			557.357	1112.7	1112.7	2	1.003	0.1341	4317.13	887817	1174740	52	61	TRUE
02_1	Uncategorized Sample	BioSample 1	02_1	g.467 ORF g.467 m.467 type:complete len:392 (+) comp163266_c0_seq2:292-1467(+)	m.467	atrina_contam.fasta	42880.1	1	23	36	90	0.00188	0.749	possibly correct	TRUE	02_1.56588.56588.2	NMAmVIATILQVGTEAQR	R	N	0.994	2.45	0.671	2		m4: Oxidation (+15.99)	981.504	1960.99	1962.01	2	-0.01354	-6.9	9863.72	88883.1	170314	125	142	TRUE
02_1	Uncategorized Sample	BioSample 1	02_1	g.467 ORF g.467 m.467 type:complete len:392 (+) comp163266_c0_seq2:292-1467(+)	m.467	atrina_contam.fasta	42880.1	1	23	36	90	0.00188	0.749	possibly correct	TRUE	02_1.56392.56392.3	NMAmVIATILQVGTEAQR	R	N	0.996	2.95	0.436	2		m4: Oxidation (+15.99)	654.676	1961.01	1962.01	3	-0.000686	-0.3496	9804.32	387223	157299	125	142	TRUE
02_1	Uncategorized Sample	BioSample 1	02_1	g.467 ORF g.467 m.467 type:complete len:392 (+) comp163266_c0_seq2:292-1467(+)	m.467	atrina_contam.fasta	42880.1	1	23	36	90	0.00188	0.749	possibly correct	TRUE	02_1.54913.54913.3	NmAMVIATILQVGTEAQR	R	N	0.997	2.73	0.56	2		m2: Oxidation (+15.99)	654.676	1961.01	1962.01	3	-0.000483	-0.2462	9346.96	266859	51924	125	142	TRUE
02_1	Uncategorized Sample	BioSample 1	02_1	g.467 ORF g.467 m.467 type:complete len:392 (+) comp163266_c0_seq2:292-1467(+)	m.467	atrina_contam.fasta	42880.1	1	23	36	90	0.00188	0.749	possibly correct	TRUE	02_1.54980.54980.3	NmAMVIATILQVGTEAQR	R	N	0.997	2.59	0.544	2		m2: Oxidation (+15.99)	654.677	1961.01	1962.01	3	0.000194	0.09887	9367.41	370021	82601	125	142	TRUE
02_1	Uncategorized Sample	BioSample 1	02_1	g.467 ORF g.467 m.467 type:complete len:392 (+) comp163266_c0_seq2:292-1467(+)	m.467	atrina_contam.fasta	42880.1	1	23	36	90	0.00188	0.749	possibly correct	TRUE	02_1.55043.55043.3	NmAMVIATILQVGTEAQR	R	N	0.997	2.64	0.572	2		m2: Oxidation (+15.99)	654.676	1961.01	1962.01	3	-0.000323	-0.1646	9387.95	298003	59521	125	142	TRUE
02_1	Uncategorized Sample	BioSample 1	02_1	g.467 ORF g.467 m.467 type:complete len:392 (+) comp163266_c0_seq2:292-1467(+)	m.467	atrina_contam.fasta	42880.1	1	23	36	90	0.00188	0.749	possibly correct	TRUE	02_1.56461.56461.3	NMAmVIATILQVGTEAQR	R	N	0.997	3.04	0.487	2		m4: Oxidation (+15.99)	654.676	1961.01	1962.01	3	-0.000109	-0.05556	9825	263552	81658	125	142	TRUE
02_1	Uncategorized Sample	BioSample 1	02_1	g.467 ORF g.467 m.467 type:complete len:392 (+) comp163266_c0_seq2:292-1467(+)	m.467	atrina_contam.fasta	42880.1	1	23	36	90	0.00188	0.749	possibly correct	TRUE	02_1.56533.56533.3	NMAmVIATILQVGTEAQR	R	N	0.997	3.58	0.462	2		m4: Oxidation (+15.99)	654.676	1961.01	1962.01	3	-0.000647	-0.3298	9845.44	555761	211387	125	142	TRUE
02_1	Uncategorized Sample	BioSample 1	02_1	g.467 ORF g.467 m.467 type:complete len:392 (+) comp163266_c0_seq2:292-1467(+)	m.467	atrina_contam.fasta	42880.1	1	23	36	90	0.00188	0.749	possibly correct	TRUE	02_1.56623.56623.2	NMAMVIATILQVGTEAQR	R	N	0.997	4.21	0.497	2			973.514	1945.01	1946.02	2	-0.000117	-0.06012	9875.51	88141.9	188128	125	142	TRUE
02_1	Uncategorized Sample	BioSample 1	02_1	g.467 ORF g.467 m.467 type:complete len:392 (+) comp163266_c0_seq2:292-1467(+)	m.467	atrina_contam.fasta	42880.1	1	23	36	90	0.00188	0.749	possibly correct	TRUE	02_1.56385.56385.2	NMAmVIATILQVGTEAQR	R	N	0.997	3.45	0.584	2		m4: Oxidation (+15.99)	981.512	1961.01	1962.01	2	0.00094	0.4791	9801.95	77000.1	97502	125	142	TRUE
02_1	Uncategorized Sample	BioSample 1	02_1	g.467 ORF g.467 m.467 type:complete len:392 (+) comp163266_c0_seq2:292-1467(+)	m.467	atrina_contam.fasta	42880.1	1	23	36	90	0.00188	0.749	possibly correct	TRUE	02_1.56684.56684.2	NMAMVIATILQVGTEAQR	R	N	0.997	4.31	0.547	2			973.513	1945.01	1946.02	2	-0.001176	-0.6043	9896.2	106185	191367	125	142	TRUE
02_1	Uncategorized Sample	BioSample 1	02_1	g.467 ORF g.467 m.467 type:complete len:392 (+) comp163266_c0_seq2:292-1467(+)	m.467	atrina_contam.fasta	42880.1	1	23	36	90	0.00188	0.749	possibly correct	TRUE	02_1.54925.54925.2	NmAMVIATILQVGTEAQR	R	N	0.997	3.21	0.65	2		m2: Oxidation (+15.99)	981.51	1961.01	1962.01	2	-0.001318	-0.6718	9350.84	75341.6	70828	125	142	TRUE
02_1	Uncategorized Sample	BioSample 1	02_1	g.467 ORF g.467 m.467 type:complete len:392 (+) comp163266_c0_seq2:292-1467(+)	m.467	atrina_contam.fasta	42880.1	1	23	36	90	0.00188	0.749	possibly correct	TRUE	02_1.56452.56452.2	NMAmVIATILQVGTEAQR	R	N	0.997	3.78	0.631	2		m4: Oxidation (+15.99)	981.512	1961.01	1962.01	2	0.001801	0.9179	9822.51	75493.2	55485	125	142	TRUE
02_1	Uncategorized Sample	BioSample 1	02_1	g.467 ORF g.467 m.467 type:complete len:392 (+) comp163266_c0_seq2:292-1467(+)	m.467	atrina_contam.fasta	42880.1	1	23	36	90	0.00188	0.749	possibly correct	TRUE	02_1.56295.56295.2	NMAmVIATILQVGTEAQR	R	N	0.997	3.79	0.664	2		m4: Oxidation (+15.99)	981.511	1961.01	1962.01	2	-0.001118	-0.5698	9768.97	72655.9	132207	125	142	TRUE
02_1	Uncategorized Sample	BioSample 1	02_1	g.467 ORF g.467 m.467 type:complete len:392 (+) comp163266_c0_seq2:292-1467(+)	m.467	atrina_contam.fasta	42880.1	1	23	36	90	0.00188	0.749	possibly correct	TRUE	02_1.56526.56526.2	NMAmVIATILQVGTEAQR	R	N	0.997	3.93	0.653	2		m4: Oxidation (+15.99)	981.51	1961.01	1962.01	2	-0.001158	-0.5902	9843.25	149486	214701	125	142	TRUE
02_1	Uncategorized Sample	BioSample 1	02_1	g.467 ORF g.467 m.467 type:complete len:392 (+) comp163266_c0_seq2:292-1467(+)	m.467	atrina_contam.fasta	42880.1	1	23	36	90	0.00188	0.749	possibly correct	TRUE	02_1.54992.54992.2	NmAMVIATILQVGTEAQR	R	N	0.997	3.7	0.693	2		m2: Oxidation (+15.99)	981.51	1961.01	1962.01	2	-0.00179	-0.9123	9371.57	90904.8	129307	125	142	TRUE
02_1	Uncategorized Sample	BioSample 1	02_1	g.467 ORF g.467 m.467 type:complete len:392 (+) comp163266_c0_seq2:292-1467(+)	m.467	atrina_contam.fasta	42880.1	1	23	36	90	0.00188	0.749	possibly correct	TRUE	02_1.3410.3410.2	NSFNGPTcGSKPTEK	R	H	0.997	3.55	0.565	2	c8: Carbamidomethyl (+57.02)		812.374	1622.73	1623.74	2	-0.001626	-1.002	1788.42	1191640	1623590	143	157	TRUE
02_1	Uncategorized Sample	BioSample 1	02_1	g.467 ORF g.467 m.467 type:complete len:392 (+) comp163266_c0_seq2:292-1467(+)	m.467	atrina_contam.fasta	42880.1	1	23	36	90	0.00188	0.749	possibly correct	TRUE	02_1.34287.34287.2	QGGDVVMQTVPDTEEYAE	K	-	0.994	2.28	0.547	2			984.431	1966.85	1967.85	2	-0.000174	-0.08842	5916.1	365871	366777	374	391	TRUE
02_1	Uncategorized Sample	BioSample 1	02_1	g.467 ORF g.467 m.467 type:complete len:392 (+) comp163266_c0_seq2:292-1467(+)	m.467	atrina_contam.fasta	42880.1	1	23	36	90	0.00188	0.749	possibly correct	TRUE	02_1.36849.36849.2	QmENIELFLK	K	G	0.976	2.01	0.281	2		m2: Oxidation (+15.99)	640.832	1279.65	1280.66	2	7.199e-05	0.05621	6272.77	169141	492535	93	102	TRUE
02_1	Uncategorized Sample	BioSample 1	02_1	g.467 ORF g.467 m.467 type:complete len:392 (+) comp163266_c0_seq2:292-1467(+)	m.467	atrina_contam.fasta	42880.1	1	23	36	90	0.00188	0.749	possibly correct	TRUE	02_1.35974.35974.2	QmENIELFLK	K	G	0.976	2.9	0.246	2		m2: Oxidation (+15.99)	640.83	1279.64	1280.66	2	-0.003537	-2.762	6150.97	294993	462905	93	102	TRUE
02_1	Uncategorized Sample	BioSample 1	02_1	g.467 ORF g.467 m.467 type:complete len:392 (+) comp163266_c0_seq2:292-1467(+)	m.467	atrina_contam.fasta	42880.1	1	23	36	90	0.00188	0.749	possibly correct	TRUE	02_1.35501.35501.2	QmENIELFLK	K	G	0.993	3.37	0.228	2		m2: Oxidation (+15.99)	640.83	1279.65	1280.66	2	-0.003052	-2.383	6085.09	953064	1772290	93	102	TRUE
02_1	Uncategorized Sample	BioSample 1	02_1	g.467 ORF g.467 m.467 type:complete len:392 (+) comp163266_c0_seq2:292-1467(+)	m.467	atrina_contam.fasta	42880.1	1	23	36	90	0.00188	0.749	possibly correct	TRUE	02_1.35807.35807.2	QmENIELFLK	K	G	0.994	3.25	0.252	2		m2: Oxidation (+15.99)	640.83	1279.64	1280.66	2	-0.003452	-2.696	6127.84	540121	711391	93	102	TRUE
02_1	Uncategorized Sample	BioSample 1	02_1	g.467 ORF g.467 m.467 type:complete len:392 (+) comp163266_c0_seq2:292-1467(+)	m.467	atrina_contam.fasta	42880.1	1	23	36	90	0.00188	0.749	possibly correct	TRUE	02_1.38984.38984.2	QMENIELFLK	K	G	0.994	2.96	0.156	2			632.834	1263.65	1264.66	2	0.000155	0.1226	6573.35	634099	313764	93	102	TRUE
02_1	Uncategorized Sample	BioSample 1	02_1	g.467 ORF g.467 m.467 type:complete len:392 (+) comp163266_c0_seq2:292-1467(+)	m.467	atrina_contam.fasta	42880.1	1	23	36	90	0.00188	0.749	possibly correct	TRUE	02_1.33362.33362.2	QmENIELFLK	K	G	0.997	2.76	0.324	2		m2: Oxidation (+15.99)	640.832	1279.65	1280.66	2	0.000214	0.1671	5787.74	222368	214200	93	102	TRUE
02_1	Uncategorized Sample	BioSample 1	02_1	g.467 ORF g.467 m.467 type:complete len:392 (+) comp163266_c0_seq2:292-1467(+)	m.467	atrina_contam.fasta	42880.1	1	23	36	90	0.00188	0.749	possibly correct	TRUE	02_1.39143.39143.2	QMENIELFLK	K	G	0.997	3.35	0.209	2			632.834	1263.65	1264.66	2	1.1e-05	0.008698	6595.74	1255820	1043520	93	102	TRUE
02_1	Uncategorized Sample	BioSample 1	02_1	g.467 ORF g.467 m.467 type:complete len:392 (+) comp163266_c0_seq2:292-1467(+)	m.467	atrina_contam.fasta	42880.1	1	23	36	90	0.00188	0.749	possibly correct	TRUE	02_1.35645.35645.2	QmENIELFLK	K	G	0.997	3.53	0.234	2		m2: Oxidation (+15.99)	640.83	1279.65	1280.66	2	-0.002006	-1.566	6105.43	822733	1303650	93	102	TRUE
02_1	Uncategorized Sample	BioSample 1	02_1	g.467 ORF g.467 m.467 type:complete len:392 (+) comp163266_c0_seq2:292-1467(+)	m.467	atrina_contam.fasta	42880.1	1	23	36	90	0.00188	0.749	possibly correct	TRUE	02_1.33518.33518.2	QmENIELFLK	K	G	0.997	3.64	0.232	2		m2: Oxidation (+15.99)	640.832	1279.65	1280.66	2	0.000155	0.121	5809.39	1134960	1008060	93	102	TRUE
02_1	Uncategorized Sample	BioSample 1	02_1	g.467 ORF g.467 m.467 type:complete len:392 (+) comp163266_c0_seq2:292-1467(+)	m.467	atrina_contam.fasta	42880.1	1	23	36	90	0.00188	0.749	possibly correct	TRUE	02_1.5441.5441.3	QSHGVIGLQSGTNK	K	F	0.997	2.95	0.415	2			475.92	1424.74	1425.74	3	0.000767	0.538	2054.93	4229470	3996930	169	182	TRUE
02_1	Uncategorized Sample	BioSample 1	02_1	g.467 ORF g.467 m.467 type:complete len:392 (+) comp163266_c0_seq2:292-1467(+)	m.467	atrina_contam.fasta	42880.1	1	23	36	90	0.00188	0.749	possibly correct	TRUE	02_1.5443.5443.2	QSHGVIGLQSGTNK	K	F	0.997	3.84	0.614	2			713.376	1424.74	1425.74	2	-1.3e-05	-0.009118	2055.11	1044620	1758140	169	182	TRUE
02_1	Uncategorized Sample	BioSample 1	02_1	g.467 ORF g.467 m.467 type:complete len:392 (+) comp163266_c0_seq2:292-1467(+)	m.467	atrina_contam.fasta	42880.1	1	23	36	90	0.00188	0.749	possibly correct	TRUE	02_1.6623.6623.2	QSSGDISLQSGTNK	K	F	0.997	3.1	0.461	2			711.347	1420.68	1421.69	2	-0.000922	-0.6485	2213.6	1240200	3074580	248	261	TRUE
02_1	Uncategorized Sample	BioSample 1	02_1	g.467 ORF g.467 m.467 type:complete len:392 (+) comp163266_c0_seq2:292-1467(+)	m.467	atrina_contam.fasta	42880.1	1	23	36	90	0.00188	0.749	possibly correct	TRUE	02_1.29948.29948.3	SHISLQSGTNQFASQQGMTGFGAVR	K	H	0.997	6.13	0.644	2			870.757	2609.25	2609.25	3	1.004	0.4108	5319.16	675701	1329640	292	316	TRUE
02_1	Uncategorized Sample	BioSample 1	02_1	g.467 ORF g.467 m.467 type:complete len:392 (+) comp163266_c0_seq2:292-1467(+)	m.467	atrina_contam.fasta	42880.1	1	23	36	90	0.00188	0.749	possibly correct	TRUE	02_1.30100.30100.3	SHISLQSGTNQFASQQGMTGFGAVR	K	H	0.997	6.08	0.656	2			870.423	2608.25	2609.25	3	0.001588	0.6086	5340.17	1766930	2946430	292	316	TRUE
02_1	Uncategorized Sample	BioSample 1	02_1	g.467 ORF g.467 m.467 type:complete len:392 (+) comp163266_c0_seq2:292-1467(+)	m.467	atrina_contam.fasta	42880.1	1	23	36	90	0.00188	0.749	possibly correct	TRUE	02_1.15006.15006.2	VTDLAEEMR	K	L	0.997	2.62	0.481	2			532.258	1062.5	1063.51	2	-0.000271	-0.2548	3325.05	1268840	1037630	363	371	TRUE
02_1	Uncategorized Sample	BioSample 1	02_1	g.467 ORF g.467 m.467 type:complete len:392 (+) comp163266_c0_seq2:292-1467(+)	m.467	atrina_contam.fasta	42880.1	1	23	36	90	0.00188	0.749	possibly correct	TRUE	02_1.5425.5425.2	VTDLAEEmR	K	L	0.997	2.47	0.5	2		m8: Oxidation (+15.99)	540.256	1078.5	1079.5	2	0.00038	0.352	2052.85	1392190	1175800	363	371	TRUE
02_1	Uncategorized Sample	BioSample 1	02_1	g.467 ORF g.467 m.467 type:complete len:392 (+) comp163266_c0_seq2:292-1467(+)	m.467	atrina_contam.fasta	42880.1	1	23	36	90	0.00188	0.749	possibly correct	TRUE	02_1.14850.14850.2	VTDLAEEMR	K	L	0.997	2.88	0.546	2			532.258	1062.5	1063.51	2	0.000251	0.236	3304.5	1964010	1171040	363	371	TRUE
02_1	Uncategorized Sample	BioSample 1	02_1	g.467 ORF g.467 m.467 type:complete len:392 (+) comp163266_c0_seq2:292-1467(+)	m.467	atrina_contam.fasta	42880.1	1	23	36	90	0.00188	0.749	possibly correct	TRUE	02_1.8898.8898.2	YDPSAEAEVR	K	H	0.997	2.32	0.641	2			568.765	1135.52	1136.52	2	0.001063	0.9353	2515.53	445970	555099	22	31	TRUE
02_1	Uncategorized Sample	BioSample 1	02_1	g.467 ORF g.467 m.467 type:complete len:392 (+) comp163266_c0_seq2:292-1467(+)	m.467	atrina_contam.fasta	42880.1	1	23	36	90	0.00188	0.749	possibly correct	TRUE	02_1.8734.8734.2	YDPSAEAEVR	K	H	0.997	2.32	0.627	2			568.765	1135.51	1136.52	2	5.2e-05	0.04575	2494.13	12435100	8549100	22	31	TRUE
02_1	Uncategorized Sample	BioSample 1	02_1	g.16296 ORF g.16296 m.16296 type:internal len:869 (+) comp255592_c0_seq1:2-2611(+)	m.16296	atrina_contam.fasta	97343.1	1	52	83	230	0.0048	0.65	possibly correct	TRUE	02_1.8735.8735.3	APHFLSKPSIK	K	Q	0.997	2.4	0.481	2			408.908	1223.7	1224.71	3	-0.000499	-0.4074	2494.2	7861000	1464050	27	37	TRUE
02_1	Uncategorized Sample	BioSample 1	02_1	g.16296 ORF g.16296 m.16296 type:internal len:869 (+) comp255592_c0_seq1:2-2611(+)	m.16296	atrina_contam.fasta	97343.1	1	52	83	230	0.0048	0.65	possibly correct	TRUE	02_1.8602.8602.2	APHFLSKPSIK	K	Q	0.997	2.59	0.544	2			612.859	1223.7	1224.71	2	0.00011	0.08982	2476.74	2212230	2954790	27	37	TRUE
02_1	Uncategorized Sample	BioSample 1	02_1	g.16296 ORF g.16296 m.16296 type:internal len:869 (+) comp255592_c0_seq1:2-2611(+)	m.16296	atrina_contam.fasta	97343.1	1	52	83	230	0.0048	0.65	possibly correct	TRUE	02_1.8568.8568.3	APHFLSKPSIK	K	Q	0.997	2.77	0.555	2			408.908	1223.7	1224.71	3	-0.000615	-0.5022	2472.25	377028	667723	27	37	TRUE
02_1	Uncategorized Sample	BioSample 1	02_1	g.16296 ORF g.16296 m.16296 type:internal len:869 (+) comp255592_c0_seq1:2-2611(+)	m.16296	atrina_contam.fasta	97343.1	1	52	83	230	0.0048	0.65	possibly correct	TRUE	02_1.6091.6091.3	APHFLSKPSIKQER	K	T	0.997	3.58	0.558	2			546.643	1636.91	1637.91	3	0.001601	0.9775	2140.77	556669	602173	27	40	TRUE
02_1	Uncategorized Sample	BioSample 1	02_1	g.16296 ORF g.16296 m.16296 type:internal len:869 (+) comp255592_c0_seq1:2-2611(+)	m.16296	atrina_contam.fasta	97343.1	1	52	83	230	0.0048	0.65	possibly correct	TRUE	02_1.5299.5299.2	AQDKPVEEPITTK	K	Q	0.997	2.8	0.566	2			728.389	1454.76	1455.77	2	0.000823	0.5653	2036.01	366079	415488	466	478	TRUE
02_1	Uncategorized Sample	BioSample 1	02_1	g.16296 ORF g.16296 m.16296 type:internal len:869 (+) comp255592_c0_seq1:2-2611(+)	m.16296	atrina_contam.fasta	97343.1	1	52	83	230	0.0048	0.65	possibly correct	TRUE	02_1.5122.5122.2	AQDKPVEEPITTK	K	Q	0.997	4.14	0.557	2			728.39	1454.77	1455.77	2	0.004207	2.89	2013.06	850082	1738120	466	478	TRUE
02_1	Uncategorized Sample	BioSample 1	02_1	g.16296 ORF g.16296 m.16296 type:internal len:869 (+) comp255592_c0_seq1:2-2611(+)	m.16296	atrina_contam.fasta	97343.1	1	52	83	230	0.0048	0.65	possibly correct	TRUE	02_1.49651.49651.2	ASLVDLIPDWPTLQHR	R	E	0.997	2.75	0.608	2			931.001	1859.99	1861	2	-0.001622	-0.8716	8245.32	133534	148916	769	784	TRUE
02_1	Uncategorized Sample	BioSample 1	02_1	g.16296 ORF g.16296 m.16296 type:internal len:869 (+) comp255592_c0_seq1:2-2611(+)	m.16296	atrina_contam.fasta	97343.1	1	52	83	230	0.0048	0.65	possibly correct	TRUE	02_1.49770.49770.2	ASLVDLIPDWPTLQHR	R	E	0.997	4.23	0.629	2			931.002	1859.99	1861	2	-0.000645	-0.3466	8266.21	2135580	4090960	769	784	TRUE
02_1	Uncategorized Sample	BioSample 1	02_1	g.16296 ORF g.16296 m.16296 type:internal len:869 (+) comp255592_c0_seq1:2-2611(+)	m.16296	atrina_contam.fasta	97343.1	1	52	83	230	0.0048	0.65	possibly correct	TRUE	02_1.49737.49737.3	ASLVDLIPDWPTLQHR	R	E	0.997	3.58	0.583	2			621.004	1859.99	1861	3	0.000213	0.1145	8259.66	7488240	9869140	769	784	TRUE
02_1	Uncategorized Sample	BioSample 1	02_1	g.16296 ORF g.16296 m.16296 type:internal len:869 (+) comp255592_c0_seq1:2-2611(+)	m.16296	atrina_contam.fasta	97343.1	1	52	83	230	0.0048	0.65	possibly correct	TRUE	02_1.49841.49841.3	ASLVDLIPDWPTLQHR	R	E	0.997	3.36	0.633	2			621.004	1859.99	1861	3	-0.000387	-0.208	8279.99	2740240	967561	769	784	TRUE
02_1	Uncategorized Sample	BioSample 1	02_1	g.16296 ORF g.16296 m.16296 type:internal len:869 (+) comp255592_c0_seq1:2-2611(+)	m.16296	atrina_contam.fasta	97343.1	1	52	83	230	0.0048	0.65	possibly correct	TRUE	02_1.35578.35578.3	AVATNELGESNATITLNFQSQDK	K	T	0.995	3.24	0.331	2			817.738	2450.19	2451.2	3	0.000401	0.1636	6095.84	238581	358571	104	126	TRUE
02_1	Uncategorized Sample	BioSample 1	02_1	g.16296 ORF g.16296 m.16296 type:internal len:869 (+) comp255592_c0_seq1:2-2611(+)	m.16296	atrina_contam.fasta	97343.1	1	52	83	230	0.0048	0.65	possibly correct	TRUE	02_1.35407.35407.3	AVATNELGESNATITLNFQSQDK	K	T	0.997	3.95	0.412	2			817.738	2450.19	2451.2	3	-8.6e-05	-0.03508	6072.03	565308	792889	104	126	TRUE
02_1	Uncategorized Sample	BioSample 1	02_1	g.16296 ORF g.16296 m.16296 type:internal len:869 (+) comp255592_c0_seq1:2-2611(+)	m.16296	atrina_contam.fasta	97343.1	1	52	83	230	0.0048	0.65	possibly correct	TRUE	02_1.35540.35540.2	AVATNELGESNATITLNFQSQDK	K	T	0.997	4.83	0.66	2			1226.6	2451.19	2451.2	2	1.002	-0.3061	6090.49	450612	689183	104	126	TRUE
02_1	Uncategorized Sample	BioSample 1	02_1	g.16296 ORF g.16296 m.16296 type:internal len:869 (+) comp255592_c0_seq1:2-2611(+)	m.16296	atrina_contam.fasta	97343.1	1	52	83	230	0.0048	0.65	possibly correct	TRUE	02_1.36821.36821.2	AVATNELGESNATITLNFQSQDK	K	T	0.997	4.71	0.703	2			1226.6	2451.18	2451.2	2	0.9903	-5.059	6268.81	355679	523527	104	126	TRUE
02_1	Uncategorized Sample	BioSample 1	02_1	g.16296 ORF g.16296 m.16296 type:internal len:869 (+) comp255592_c0_seq1:2-2611(+)	m.16296	atrina_contam.fasta	97343.1	1	52	83	230	0.0048	0.65	possibly correct	TRUE	02_1.35703.35703.2	AVATNELGESNATITLNFQSQDK	K	T	0.997	4.7	0.715	2			1226.6	2451.19	2451.2	2	0.9978	-2.019	6113.39	261289	282695	104	126	TRUE
02_1	Uncategorized Sample	BioSample 1	02_1	g.16296 ORF g.16296 m.16296 type:internal len:869 (+) comp255592_c0_seq1:2-2611(+)	m.16296	atrina_contam.fasta	97343.1	1	52	83	230	0.0048	0.65	possibly correct	TRUE	02_1.35379.35379.2	AVATNELGESNATITLNFQSQDK	K	T	0.997	5.72	0.699	2			1226.6	2451.19	2451.2	2	0.9998	-1.203	6068.15	912181	1146550	104	126	TRUE
02_1	Uncategorized Sample	BioSample 1	02_1	g.16296 ORF g.16296 m.16296 type:internal len:869 (+) comp255592_c0_seq1:2-2611(+)	m.16296	atrina_contam.fasta	97343.1	1	52	83	230	0.0048	0.65	possibly correct	TRUE	02_1.35056.35056.2	AVATNELGESNATITLNFQSQDK	K	T	0.997	5.56	0.684	2			1226.1	2450.19	2451.2	2	0.001442	0.5883	6023.37	267754	460928	104	126	TRUE
02_1	Uncategorized Sample	BioSample 1	02_1	g.16296 ORF g.16296 m.16296 type:internal len:869 (+) comp255592_c0_seq1:2-2611(+)	m.16296	atrina_contam.fasta	97343.1	1	52	83	230	0.0048	0.65	possibly correct	TRUE	02_1.35087.35087.3	AVATNELGESNATITLNFQSQDK	K	T	0.997	4.38	0.61	2			817.739	2450.2	2451.2	3	0.003362	1.372	6027.68	839657	932767	104	126	TRUE
02_1	Uncategorized Sample	BioSample 1	02_1	g.16296 ORF g.16296 m.16296 type:internal len:869 (+) comp255592_c0_seq1:2-2611(+)	m.16296	atrina_contam.fasta	97343.1	1	52	83	230	0.0048	0.65	possibly correct	TRUE	02_1.35246.35246.3	AVATNELGESNATITLNFQSQDK	K	T	0.997	4.79	0.593	2			817.738	2450.19	2451.2	3	0.000871	0.3553	6049.76	2596960	2229490	104	126	TRUE
02_1	Uncategorized Sample	BioSample 1	02_1	g.16296 ORF g.16296 m.16296 type:internal len:869 (+) comp255592_c0_seq1:2-2611(+)	m.16296	atrina_contam.fasta	97343.1	1	52	83	230	0.0048	0.65	possibly correct	TRUE	02_1.35213.35213.2	AVATNELGESNATITLNFQSQDK	K	T	0.997	6.45	0.728	2			1226.1	2450.19	2451.2	2	0.002254	0.9195	6045.16	4393960	6799530	104	126	TRUE
02_1	Uncategorized Sample	BioSample 1	02_1	g.16296 ORF g.16296 m.16296 type:internal len:869 (+) comp255592_c0_seq1:2-2611(+)	m.16296	atrina_contam.fasta	97343.1	1	52	83	230	0.0048	0.65	possibly correct	TRUE	02_1.5736.5736.3	cVIKNPAGEATSNAK	K	I	0.997	3.4	0.552	2	c1: Carbamidomethyl (+57.02)		520.6	1558.78	1559.78	3	0.0007357	0.4717	2093.53	3642050	4162700	309	323	TRUE
02_1	Uncategorized Sample	BioSample 1	02_1	g.16296 ORF g.16296 m.16296 type:internal len:869 (+) comp255592_c0_seq1:2-2611(+)	m.16296	atrina_contam.fasta	97343.1	1	52	83	230	0.0048	0.65	possibly correct	TRUE	02_1.18719.18719.3	DAGAPDRYVATMTIKDPK	K	A	0.997	4.03	0.403	2			650.332	1947.97	1948.98	3	0.001616	0.8292	3817.35	150742	605172	78	95	TRUE
02_1	Uncategorized Sample	BioSample 1	02_1	g.16296 ORF g.16296 m.16296 type:internal len:869 (+) comp255592_c0_seq1:2-2611(+)	m.16296	atrina_contam.fasta	97343.1	1	52	83	230	0.0048	0.65	possibly correct	TRUE	02_1.6644.6644.2	DGDIQKDGEYETQGPR	E	K	0.99	2.85	0.524	1			904.907	1807.8	1807.81	2	0.9962	-3.622	2216.44	209883	405959	534	549	TRUE
02_1	Uncategorized Sample	BioSample 1	02_1	g.16296 ORF g.16296 m.16296 type:internal len:869 (+) comp255592_c0_seq1:2-2611(+)	m.16296	atrina_contam.fasta	97343.1	1	52	83	230	0.0048	0.65	possibly correct	TRUE	02_1.6794.6794.3	DGDIQKDGEYETQGPR	E	K	0.995	2.28	0.467	1			603.275	1806.8	1807.81	3	-0.000199	-0.1101	2235.84	253113	278680	534	549	TRUE
02_1	Uncategorized Sample	BioSample 1	02_1	g.16296 ORF g.16296 m.16296 type:internal len:869 (+) comp255592_c0_seq1:2-2611(+)	m.16296	atrina_contam.fasta	97343.1	1	52	83	230	0.0048	0.65	possibly correct	TRUE	02_1.6268.6268.3	DGDIQKDGEYETQGPR	E	K	0.997	3.8	0.431	1			603.276	1806.81	1807.81	3	0.004932	2.728	2164.47	373804	870476	534	549	TRUE
02_1	Uncategorized Sample	BioSample 1	02_1	g.16296 ORF g.16296 m.16296 type:internal len:869 (+) comp255592_c0_seq1:2-2611(+)	m.16296	atrina_contam.fasta	97343.1	1	52	83	230	0.0048	0.65	possibly correct	TRUE	02_1.6621.6621.3	DGDIQKDGEYETQGPR	E	K	0.997	3.95	0.577	1			603.275	1806.8	1807.81	3	0.002157	1.193	2213.35	427759	538889	534	549	TRUE
02_1	Uncategorized Sample	BioSample 1	02_1	g.16296 ORF g.16296 m.16296 type:internal len:869 (+) comp255592_c0_seq1:2-2611(+)	m.16296	atrina_contam.fasta	97343.1	1	52	83	230	0.0048	0.65	possibly correct	TRUE	02_1.6422.6422.3	DGDIQKDGEYETQGPR	E	K	0.997	4.26	0.601	1			603.274	1806.8	1807.81	3	-0.000799	-0.442	2185.08	288220	779461	534	549	TRUE
02_1	Uncategorized Sample	BioSample 1	02_1	g.16296 ORF g.16296 m.16296 type:internal len:869 (+) comp255592_c0_seq1:2-2611(+)	m.16296	atrina_contam.fasta	97343.1	1	52	83	230	0.0048	0.65	possibly correct	TRUE	02_1.11570.11570.2	DSGEFKVEVK	K	N	0.988	2.53	0.241	2			569.293	1136.57	1137.58	2	-0.000345	-0.3033	2870.42	487737	343492	403	412	TRUE
02_1	Uncategorized Sample	BioSample 1	02_1	g.16296 ORF g.16296 m.16296 type:internal len:869 (+) comp255592_c0_seq1:2-2611(+)	m.16296	atrina_contam.fasta	97343.1	1	52	83	230	0.0048	0.65	possibly correct	TRUE	02_1.11732.11732.2	DSGEFKVEVK	K	N	0.997	2.78	0.41	2			569.293	1136.57	1137.58	2	-0.000582	-0.5116	2891.89	255189	301912	403	412	TRUE
02_1	Uncategorized Sample	BioSample 1	02_1	g.16296 ORF g.16296 m.16296 type:internal len:869 (+) comp255592_c0_seq1:2-2611(+)	m.16296	atrina_contam.fasta	97343.1	1	52	83	230	0.0048	0.65	possibly correct	TRUE	02_1.13346.13346.2	DSGEFKVEVK	K	N	0.997	2.81	0.394	2			569.294	1136.57	1137.58	2	0.001007	0.8852	3105.03	479096	221246	403	412	TRUE
02_1	Uncategorized Sample	BioSample 1	02_1	g.16296 ORF g.16296 m.16296 type:internal len:869 (+) comp255592_c0_seq1:2-2611(+)	m.16296	atrina_contam.fasta	97343.1	1	52	83	230	0.0048	0.65	possibly correct	TRUE	02_1.11411.11411.2	DSGEFKVEVK	K	N	0.997	3.06	0.373	2			569.293	1136.57	1137.58	2	0.000741	0.6514	2849.33	912103	788792	403	412	TRUE
02_1	Uncategorized Sample	BioSample 1	02_1	g.16296 ORF g.16296 m.16296 type:internal len:869 (+) comp255592_c0_seq1:2-2611(+)	m.16296	atrina_contam.fasta	97343.1	1	52	83	230	0.0048	0.65	possibly correct	TRUE	02_1.10943.10943.2	DSGEFKVEVK	K	N	0.997	3.12	0.36	2			569.293	1136.57	1137.58	2	0.000378	0.3323	2785.62	361667	485359	403	412	TRUE
02_1	Uncategorized Sample	BioSample 1	02_1	g.16296 ORF g.16296 m.16296 type:internal len:869 (+) comp255592_c0_seq1:2-2611(+)	m.16296	atrina_contam.fasta	97343.1	1	52	83	230	0.0048	0.65	possibly correct	TRUE	02_1.11250.11250.2	DSGEFKVEVK	K	N	0.997	3.37	0.38	2			569.292	1136.57	1137.58	2	-0.002315	-2.035	2827.85	1134260	1648530	403	412	TRUE
02_1	Uncategorized Sample	BioSample 1	02_1	g.16296 ORF g.16296 m.16296 type:internal len:869 (+) comp255592_c0_seq1:2-2611(+)	m.16296	atrina_contam.fasta	97343.1	1	52	83	230	0.0048	0.65	possibly correct	TRUE	02_1.11101.11101.2	DSGEFKVEVK	K	N	0.997	3.51	0.427	2			569.293	1136.57	1137.58	2	-0.000473	-0.4158	2806.9	10936700	8548350	403	412	TRUE
02_1	Uncategorized Sample	BioSample 1	02_1	g.16296 ORF g.16296 m.16296 type:internal len:869 (+) comp255592_c0_seq1:2-2611(+)	m.16296	atrina_contam.fasta	97343.1	1	52	83	230	0.0048	0.65	possibly correct	TRUE	02_1.31035.31035.2	EEPDKFITELEDQK	K	L	0.997	2.95	0.39	2			860.919	1719.82	1720.83	2	0.002756	1.602	5468.22	177712	186310	789	802	TRUE
02_1	Uncategorized Sample	BioSample 1	02_1	g.16296 ORF g.16296 m.16296 type:internal len:869 (+) comp255592_c0_seq1:2-2611(+)	m.16296	atrina_contam.fasta	97343.1	1	52	83	230	0.0048	0.65	possibly correct	TRUE	02_1.31124.31124.3	EEPDKFITELEDQK	K	L	0.997	3.02	0.415	2			574.281	1719.82	1720.83	3	0.001463	0.8502	5480.88	396412	181395	789	802	TRUE
02_1	Uncategorized Sample	BioSample 1	02_1	g.16296 ORF g.16296 m.16296 type:internal len:869 (+) comp255592_c0_seq1:2-2611(+)	m.16296	atrina_contam.fasta	97343.1	1	52	83	230	0.0048	0.65	possibly correct	TRUE	02_1.38395.38395.3	EEPDKFITELEDQKLLEGTK	K	K	0.995	2.72	0.461	2			788.407	2362.2	2362.2	3	1.003	-0.05401	6488.79	160864	194739	789	808	TRUE
02_1	Uncategorized Sample	BioSample 1	02_1	g.16296 ORF g.16296 m.16296 type:internal len:869 (+) comp255592_c0_seq1:2-2611(+)	m.16296	atrina_contam.fasta	97343.1	1	52	83	230	0.0048	0.65	possibly correct	TRUE	02_1.2300.2300.3	ETVPEKPKEEPK	K	P	0.984	2.54	0.361	2			470.92	1409.74	1410.75	3	-0.001099	-0.779	1641.08	1152350	882613	490	501	TRUE
02_1	Uncategorized Sample	BioSample 1	02_1	g.16296 ORF g.16296 m.16296 type:internal len:869 (+) comp255592_c0_seq1:2-2611(+)	m.16296	atrina_contam.fasta	97343.1	1	52	83	230	0.0048	0.65	possibly correct	TRUE	02_1.7255.7255.3	FScQFcKPNcK	K	V	0.997	2.42	0.505	2	c3: Carbamidomethyl (+57.02), c6: Carbamidomethyl (+57.02), c10: Carbamidomethyl (+57.02)		492.546	1474.62	1475.62	3	-8.29e-05	-0.05618	2297	3855730	4903710	812	822	TRUE
02_1	Uncategorized Sample	BioSample 1	02_1	g.16296 ORF g.16296 m.16296 type:internal len:869 (+) comp255592_c0_seq1:2-2611(+)	m.16296	atrina_contam.fasta	97343.1	1	52	83	230	0.0048	0.65	possibly correct	TRUE	02_1.7411.7411.3	FScQFcKPNcK	K	V	0.997	2.71	0.566	2	c3: Carbamidomethyl (+57.02), c6: Carbamidomethyl (+57.02), c10: Carbamidomethyl (+57.02)		492.546	1474.62	1475.62	3	-5.29e-05	-0.03585	2317.89	4103540	3613170	812	822	TRUE
02_1	Uncategorized Sample	BioSample 1	02_1	g.16296 ORF g.16296 m.16296 type:internal len:869 (+) comp255592_c0_seq1:2-2611(+)	m.16296	atrina_contam.fasta	97343.1	1	52	83	230	0.0048	0.65	possibly correct	TRUE	02_1.7242.7242.2	FScQFcKPNcK	K	V	0.997	2.87	0.576	2	c3: Carbamidomethyl (+57.02), c6: Carbamidomethyl (+57.02), c10: Carbamidomethyl (+57.02)		738.313	1474.61	1475.62	2	-0.00367	-2.487	2295.3	793795	1108370	812	822	TRUE
02_1	Uncategorized Sample	BioSample 1	02_1	g.16296 ORF g.16296 m.16296 type:internal len:869 (+) comp255592_c0_seq1:2-2611(+)	m.16296	atrina_contam.fasta	97343.1	1	52	83	230	0.0048	0.65	possibly correct	TRUE	02_1.22891.22891.3	GKIENQVIMEGDDINVK	K	V	0.995	2.81	0.395	2			634.994	1901.96	1901.96	3	1.003	-0.1196	4366.26	628490	264306	574	590	TRUE
02_1	Uncategorized Sample	BioSample 1	02_1	g.16296 ORF g.16296 m.16296 type:internal len:869 (+) comp255592_c0_seq1:2-2611(+)	m.16296	atrina_contam.fasta	97343.1	1	52	83	230	0.0048	0.65	possibly correct	TRUE	02_1.22535.22535.3	GKIENQVIMEGDDINVK	K	V	0.997	3.13	0.489	2			634.994	1901.96	1901.96	3	1.003	-0.1196	4319.13	655285	1374360	574	590	TRUE
02_1	Uncategorized Sample	BioSample 1	02_1	g.16296 ORF g.16296 m.16296 type:internal len:869 (+) comp255592_c0_seq1:2-2611(+)	m.16296	atrina_contam.fasta	97343.1	1	52	83	230	0.0048	0.65	possibly correct	TRUE	02_1.20002.20002.3	GKIENQVImEGDDINVK	K	V	0.997	3.73	0.394	2		m9: Oxidation (+15.99)	639.991	1916.95	1917.96	3	0.00076	0.3962	3986.78	2023160	1373550	574	590	TRUE
02_1	Uncategorized Sample	BioSample 1	02_1	g.16296 ORF g.16296 m.16296 type:internal len:869 (+) comp255592_c0_seq1:2-2611(+)	m.16296	atrina_contam.fasta	97343.1	1	52	83	230	0.0048	0.65	possibly correct	TRUE	02_1.20507.20507.2	GKIENQVImEGDDINVK	K	V	0.997	4.61	0.477	2		m9: Oxidation (+15.99)	959.987	1917.96	1917.96	2	1.009	3.04	4052.54	611090	932221	574	590	TRUE
02_1	Uncategorized Sample	BioSample 1	02_1	g.16296 ORF g.16296 m.16296 type:internal len:869 (+) comp255592_c0_seq1:2-2611(+)	m.16296	atrina_contam.fasta	97343.1	1	52	83	230	0.0048	0.65	possibly correct	TRUE	02_1.20385.20385.3	GKIENQVImEGDDINVK	K	V	0.997	3.33	0.495	2		m9: Oxidation (+15.99)	639.991	1916.95	1917.96	3	-0.000514	-0.268	4036.38	553330	1051890	574	590	TRUE
02_1	Uncategorized Sample	BioSample 1	02_1	g.16296 ORF g.16296 m.16296 type:internal len:869 (+) comp255592_c0_seq1:2-2611(+)	m.16296	atrina_contam.fasta	97343.1	1	52	83	230	0.0048	0.65	possibly correct	TRUE	02_1.20875.20875.3	GKIENQVImEGDDINVK	K	V	0.997	3.32	0.508	2		m9: Oxidation (+15.99)	639.992	1916.95	1917.96	3	0.002533	1.321	4100.94	482078	281712	574	590	TRUE
02_1	Uncategorized Sample	BioSample 1	02_1	g.16296 ORF g.16296 m.16296 type:internal len:869 (+) comp255592_c0_seq1:2-2611(+)	m.16296	atrina_contam.fasta	97343.1	1	52	83	230	0.0048	0.65	possibly correct	TRUE	02_1.19845.19845.3	GKIENQVImEGDDINVK	K	V	0.997	3.99	0.481	2		m9: Oxidation (+15.99)	639.991	1916.95	1917.96	3	0.000275	0.1434	3966.11	820414	1203960	574	590	TRUE
02_1	Uncategorized Sample	BioSample 1	02_1	g.16296 ORF g.16296 m.16296 type:internal len:869 (+) comp255592_c0_seq1:2-2611(+)	m.16296	atrina_contam.fasta	97343.1	1	52	83	230	0.0048	0.65	possibly correct	TRUE	02_1.20550.20550.3	GKIENQVImEGDDINVK	K	V	0.997	4.18	0.504	2		m9: Oxidation (+15.99)	639.992	1916.95	1917.96	3	0.001113	0.5803	4058.26	1287840	821066	574	590	TRUE
02_1	Uncategorized Sample	BioSample 1	02_1	g.16296 ORF g.16296 m.16296 type:internal len:869 (+) comp255592_c0_seq1:2-2611(+)	m.16296	atrina_contam.fasta	97343.1	1	52	83	230	0.0048	0.65	possibly correct	TRUE	02_1.20710.20710.3	GKIENQVImEGDDINVK	K	V	0.997	4.02	0.534	2		m9: Oxidation (+15.99)	639.991	1916.95	1917.96	3	-0.001371	-0.7148	4079.32	932587	581093	574	590	TRUE
02_1	Uncategorized Sample	BioSample 1	02_1	g.16296 ORF g.16296 m.16296 type:internal len:869 (+) comp255592_c0_seq1:2-2611(+)	m.16296	atrina_contam.fasta	97343.1	1	52	83	230	0.0048	0.65	possibly correct	TRUE	02_1.22689.22689.3	GKIENQVIMEGDDINVK	K	V	0.997	3.91	0.548	2			634.66	1900.96	1901.96	3	0.00027	0.142	4339.55	13369800	13520100	574	590	TRUE
02_1	Uncategorized Sample	BioSample 1	02_1	g.16296 ORF g.16296 m.16296 type:internal len:869 (+) comp255592_c0_seq1:2-2611(+)	m.16296	atrina_contam.fasta	97343.1	1	52	83	230	0.0048	0.65	possibly correct	TRUE	02_1.22552.22552.2	GKIENQVIMEGDDINVK	K	V	0.997	5.58	0.674	2			951.483	1900.95	1901.96	2	-0.004752	-2.498	4321.27	586197	740394	574	590	TRUE
02_1	Uncategorized Sample	BioSample 1	02_1	g.16296 ORF g.16296 m.16296 type:internal len:869 (+) comp255592_c0_seq1:2-2611(+)	m.16296	atrina_contam.fasta	97343.1	1	52	83	230	0.0048	0.65	possibly correct	TRUE	02_1.22723.22723.2	GKIENQVIMEGDDINVK	K	V	0.997	6.22	0.71	2			951.486	1900.96	1901.96	2	0.000631	0.3318	4344.03	1383880	1514000	574	590	TRUE
02_1	Uncategorized Sample	BioSample 1	02_1	g.16296 ORF g.16296 m.16296 type:internal len:869 (+) comp255592_c0_seq1:2-2611(+)	m.16296	atrina_contam.fasta	97343.1	1	52	83	230	0.0048	0.65	possibly correct	TRUE	02_1.54850.54850.2	GNDYVFYLDILNFNK	K	N	0.997	3.67	0.487	2			917.953	1833.89	1834.9	2	-0.001837	-1.001	9331.3	328186	467185	186	200	TRUE
02_1	Uncategorized Sample	BioSample 1	02_1	g.16296 ORF g.16296 m.16296 type:internal len:869 (+) comp255592_c0_seq1:2-2611(+)	m.16296	atrina_contam.fasta	97343.1	1	52	83	230	0.0048	0.65	possibly correct	TRUE	02_1.3728.3728.2	IDGPTHTLK	K	G	0.996	2.55	0.399	2			491.272	980.529	981.537	2	-5.5e-05	-0.05603	1830.97	19114600	18325100	565	573	TRUE
02_1	Uncategorized Sample	BioSample 1	02_1	g.16296 ORF g.16296 m.16296 type:internal len:869 (+) comp255592_c0_seq1:2-2611(+)	m.16296	atrina_contam.fasta	97343.1	1	52	83	230	0.0048	0.65	possibly correct	TRUE	02_1.22044.22044.2	IENQVImEGDDINVK	K	V	0.988	3.17	0.22	2		m7: Oxidation (+15.99)	866.925	1731.84	1732.84	2	0.000663	0.3826	4254.21	1498410	3505610	576	590	TRUE
02_1	Uncategorized Sample	BioSample 1	02_1	g.16296 ORF g.16296 m.16296 type:internal len:869 (+) comp255592_c0_seq1:2-2611(+)	m.16296	atrina_contam.fasta	97343.1	1	52	83	230	0.0048	0.65	possibly correct	TRUE	02_1.23409.23409.2	IENQVImEGDDINVK	K	V	0.993	3.17	0.461	2		m7: Oxidation (+15.99)	867.426	1732.84	1732.84	2	1.001	-0.8453	4435.66	703663	2484550	576	590	TRUE
02_1	Uncategorized Sample	BioSample 1	02_1	g.16296 ORF g.16296 m.16296 type:internal len:869 (+) comp255592_c0_seq1:2-2611(+)	m.16296	atrina_contam.fasta	97343.1	1	52	83	230	0.0048	0.65	possibly correct	TRUE	02_1.23066.23066.2	IENQVImEGDDINVK	K	V	0.997	4.18	0.546	2		m7: Oxidation (+15.99)	867.425	1732.83	1732.84	2	0.9997	-1.768	4389.33	434987	440977	576	590	TRUE
02_1	Uncategorized Sample	BioSample 1	02_1	g.16296 ORF g.16296 m.16296 type:internal len:869 (+) comp255592_c0_seq1:2-2611(+)	m.16296	atrina_contam.fasta	97343.1	1	52	83	230	0.0048	0.65	possibly correct	TRUE	02_1.26808.26808.2	IENQVIMEGDDINVK	K	V	0.997	3.95	0.565	2			858.927	1715.84	1716.85	2	-0.00063	-0.367	4892.92	312436	513883	576	590	TRUE
02_1	Uncategorized Sample	BioSample 1	02_1	g.16296 ORF g.16296 m.16296 type:internal len:869 (+) comp255592_c0_seq1:2-2611(+)	m.16296	atrina_contam.fasta	97343.1	1	52	83	230	0.0048	0.65	possibly correct	TRUE	02_1.26964.26964.2	IENQVIMEGDDINVK	K	V	0.997	4.45	0.529	2			858.927	1715.84	1716.85	2	-0.000435	-0.2534	4914.54	1270420	1840560	576	590	TRUE
02_1	Uncategorized Sample	BioSample 1	02_1	g.16296 ORF g.16296 m.16296 type:internal len:869 (+) comp255592_c0_seq1:2-2611(+)	m.16296	atrina_contam.fasta	97343.1	1	52	83	230	0.0048	0.65	possibly correct	TRUE	02_1.36497.36497.2	IImEIANPIDADSGDYK	K	C	0.981	2.53	0.532	2		m3: Oxidation (+15.99)	940.953	1879.89	1880.89	2	0.00425	2.26	6224	144467	258260	292	308	TRUE
02_1	Uncategorized Sample	BioSample 1	02_1	g.16296 ORF g.16296 m.16296 type:internal len:869 (+) comp255592_c0_seq1:2-2611(+)	m.16296	atrina_contam.fasta	97343.1	1	52	83	230	0.0048	0.65	possibly correct	TRUE	02_1.39822.39822.2	IIMEIANPIDADSGDYK	K	C	0.982	2.47	0.58	2			933.457	1864.9	1864.9	2	1.007	2.117	6693.24	125034	109994	292	308	TRUE
02_1	Uncategorized Sample	BioSample 1	02_1	g.16296 ORF g.16296 m.16296 type:internal len:869 (+) comp255592_c0_seq1:2-2611(+)	m.16296	atrina_contam.fasta	97343.1	1	52	83	230	0.0048	0.65	possibly correct	TRUE	02_1.37731.37731.2	IImEIANPIDADSGDYK	K	C	0.991	2.25	0.573	2		m3: Oxidation (+15.99)	940.951	1879.89	1880.89	2	-0.001173	-0.6236	6395.22	117779	149427	292	308	TRUE
02_1	Uncategorized Sample	BioSample 1	02_1	g.16296 ORF g.16296 m.16296 type:internal len:869 (+) comp255592_c0_seq1:2-2611(+)	m.16296	atrina_contam.fasta	97343.1	1	52	83	230	0.0048	0.65	possibly correct	TRUE	02_1.37379.37379.2	IImEIANPIDADSGDYK	K	C	0.993	2.63	0.516	2		m3: Oxidation (+15.99)	940.953	1879.89	1880.89	2	0.002822	1.5	6346.37	116576	147004	292	308	TRUE
02_1	Uncategorized Sample	BioSample 1	02_1	g.16296 ORF g.16296 m.16296 type:internal len:869 (+) comp255592_c0_seq1:2-2611(+)	m.16296	atrina_contam.fasta	97343.1	1	52	83	230	0.0048	0.65	possibly correct	TRUE	02_1.35283.35283.2	IImEIANPIDADSGDYK	K	C	0.993	3.03	0.455	2		m3: Oxidation (+15.99)	940.954	1879.89	1880.89	2	0.005218	2.774	6054.8	245573	242265	292	308	TRUE
02_1	Uncategorized Sample	BioSample 1	02_1	g.16296 ORF g.16296 m.16296 type:internal len:869 (+) comp255592_c0_seq1:2-2611(+)	m.16296	atrina_contam.fasta	97343.1	1	52	83	230	0.0048	0.65	possibly correct	TRUE	02_1.37571.37571.2	IImEIANPIDADSGDYK	K	C	0.997	2.43	0.589	2		m3: Oxidation (+15.99)	940.952	1879.89	1880.89	2	0.002363	1.256	6372.97	207024	199997	292	308	TRUE
02_1	Uncategorized Sample	BioSample 1	02_1	g.16296 ORF g.16296 m.16296 type:internal len:869 (+) comp255592_c0_seq1:2-2611(+)	m.16296	atrina_contam.fasta	97343.1	1	52	83	230	0.0048	0.65	possibly correct	TRUE	02_1.39661.39661.2	IIMEIANPIDADSGDYK	K	C	0.997	2.78	0.547	2			932.954	1863.89	1864.9	2	0.000478	0.2563	6670.02	138409	147809	292	308	TRUE
02_1	Uncategorized Sample	BioSample 1	02_1	g.16296 ORF g.16296 m.16296 type:internal len:869 (+) comp255592_c0_seq1:2-2611(+)	m.16296	atrina_contam.fasta	97343.1	1	52	83	230	0.0048	0.65	possibly correct	TRUE	02_1.38667.38667.2	IImEIANPIDADSGDYK	K	C	0.997	3.42	0.557	2		m3: Oxidation (+15.99)	941.454	1880.89	1880.89	2	1.005	1.187	6527.24	82758.4	179581	292	308	TRUE
02_1	Uncategorized Sample	BioSample 1	02_1	g.16296 ORF g.16296 m.16296 type:internal len:869 (+) comp255592_c0_seq1:2-2611(+)	m.16296	atrina_contam.fasta	97343.1	1	52	83	230	0.0048	0.65	possibly correct	TRUE	02_1.34797.34797.2	IImEIANPIDADSGDYK	K	C	0.997	3.57	0.482	2		m3: Oxidation (+15.99)	940.954	1879.89	1880.89	2	0.006608	3.513	5987.2	264124	391332	292	308	TRUE
02_1	Uncategorized Sample	BioSample 1	02_1	g.16296 ORF g.16296 m.16296 type:internal len:869 (+) comp255592_c0_seq1:2-2611(+)	m.16296	atrina_contam.fasta	97343.1	1	52	83	230	0.0048	0.65	possibly correct	TRUE	02_1.34479.34479.2	IImEIANPIDADSGDYK	K	C	0.997	3.85	0.485	2		m3: Oxidation (+15.99)	940.95	1879.89	1880.89	2	-0.001767	-0.9395	5942.67	593660	630228	292	308	TRUE
02_1	Uncategorized Sample	BioSample 1	02_1	g.16296 ORF g.16296 m.16296 type:internal len:869 (+) comp255592_c0_seq1:2-2611(+)	m.16296	atrina_contam.fasta	97343.1	1	52	83	230	0.0048	0.65	possibly correct	TRUE	02_1.35975.35975.2	IImEIANPIDADSGDYK	K	C	0.997	3.16	0.621	2		m3: Oxidation (+15.99)	941.454	1880.89	1880.89	2	1.006	1.931	6151.1	294529	232681	292	308	TRUE
02_1	Uncategorized Sample	BioSample 1	02_1	g.16296 ORF g.16296 m.16296 type:internal len:869 (+) comp255592_c0_seq1:2-2611(+)	m.16296	atrina_contam.fasta	97343.1	1	52	83	230	0.0048	0.65	possibly correct	TRUE	02_1.39021.39021.2	IIMEIANPIDADSGDYK	K	C	0.997	3.67	0.582	2			933.457	1864.9	1864.9	2	1.006	1.581	6578.56	305126	380223	292	308	TRUE
02_1	Uncategorized Sample	BioSample 1	02_1	g.16296 ORF g.16296 m.16296 type:internal len:869 (+) comp255592_c0_seq1:2-2611(+)	m.16296	atrina_contam.fasta	97343.1	1	52	83	230	0.0048	0.65	possibly correct	TRUE	02_1.34638.34638.2	IImEIANPIDADSGDYK	K	C	0.997	3.63	0.554	2		m3: Oxidation (+15.99)	940.953	1879.89	1880.89	2	0.003784	2.012	5964.87	380349	483089	292	308	TRUE
02_1	Uncategorized Sample	BioSample 1	02_1	g.16296 ORF g.16296 m.16296 type:internal len:869 (+) comp255592_c0_seq1:2-2611(+)	m.16296	atrina_contam.fasta	97343.1	1	52	83	230	0.0048	0.65	possibly correct	TRUE	02_1.35599.35599.2	IImEIANPIDADSGDYK	K	C	0.997	3.71	0.55	2		m3: Oxidation (+15.99)	940.954	1879.89	1880.89	2	0.005167	2.747	6098.85	266829	331727	292	308	TRUE
02_1	Uncategorized Sample	BioSample 1	02_1	g.16296 ORF g.16296 m.16296 type:internal len:869 (+) comp255592_c0_seq1:2-2611(+)	m.16296	atrina_contam.fasta	97343.1	1	52	83	230	0.0048	0.65	possibly correct	TRUE	02_1.35440.35440.2	IImEIANPIDADSGDYK	K	C	0.997	3.71	0.584	2		m3: Oxidation (+15.99)	940.951	1879.89	1880.89	2	0.000345	0.1834	6076.6	263375	298379	292	308	TRUE
02_1	Uncategorized Sample	BioSample 1	02_1	g.16296 ORF g.16296 m.16296 type:internal len:869 (+) comp255592_c0_seq1:2-2611(+)	m.16296	atrina_contam.fasta	97343.1	1	52	83	230	0.0048	0.65	possibly correct	TRUE	02_1.30766.30766.2	IImEIANPIDADSGDYK	K	C	0.997	3.87	0.589	2		m3: Oxidation (+15.99)	940.948	1879.88	1880.89	2	-0.006637	-3.529	5432	606725	1208920	292	308	TRUE
02_1	Uncategorized Sample	BioSample 1	02_1	g.16296 ORF g.16296 m.16296 type:internal len:869 (+) comp255592_c0_seq1:2-2611(+)	m.16296	atrina_contam.fasta	97343.1	1	52	83	230	0.0048	0.65	possibly correct	TRUE	02_1.33062.33062.2	IImEIANPIDADSGDYK	K	C	0.997	3.51	0.627	2		m3: Oxidation (+15.99)	940.95	1879.89	1880.89	2	-0.001557	-0.8278	5745.72	308130	305798	292	308	TRUE
02_1	Uncategorized Sample	BioSample 1	02_1	g.16296 ORF g.16296 m.16296 type:internal len:869 (+) comp255592_c0_seq1:2-2611(+)	m.16296	atrina_contam.fasta	97343.1	1	52	83	230	0.0048	0.65	possibly correct	TRUE	02_1.33837.33837.2	IImEIANPIDADSGDYK	K	C	0.997	4.17	0.578	2		m3: Oxidation (+15.99)	940.951	1879.89	1880.89	2	-8.901e-05	-0.04732	5853.92	1261860	1694520	292	308	TRUE
02_1	Uncategorized Sample	BioSample 1	02_1	g.16296 ORF g.16296 m.16296 type:internal len:869 (+) comp255592_c0_seq1:2-2611(+)	m.16296	atrina_contam.fasta	97343.1	1	52	83	230	0.0048	0.65	possibly correct	TRUE	02_1.33373.33373.2	IImEIANPIDADSGDYK	K	C	0.997	4.37	0.564	2		m3: Oxidation (+15.99)	940.952	1879.89	1880.89	2	0.000814	0.4328	5789.28	1450830	2660300	292	308	TRUE
02_1	Uncategorized Sample	BioSample 1	02_1	g.16296 ORF g.16296 m.16296 type:internal len:869 (+) comp255592_c0_seq1:2-2611(+)	m.16296	atrina_contam.fasta	97343.1	1	52	83	230	0.0048	0.65	possibly correct	TRUE	02_1.33533.33533.2	IImEIANPIDADSGDYK	K	C	0.997	4.19	0.581	2		m3: Oxidation (+15.99)	940.952	1879.89	1880.89	2	0.0009	0.4785	5811.66	1151520	1578280	292	308	TRUE
02_1	Uncategorized Sample	BioSample 1	02_1	g.16296 ORF g.16296 m.16296 type:internal len:869 (+) comp255592_c0_seq1:2-2611(+)	m.16296	atrina_contam.fasta	97343.1	1	52	83	230	0.0048	0.65	possibly correct	TRUE	02_1.34318.34318.2	IImEIANPIDADSGDYK	K	C	0.997	4.32	0.575	2		m3: Oxidation (+15.99)	940.953	1879.89	1880.89	2	0.003862	2.053	5920.38	526762	888646	292	308	TRUE
02_1	Uncategorized Sample	BioSample 1	02_1	g.16296 ORF g.16296 m.16296 type:internal len:869 (+) comp255592_c0_seq1:2-2611(+)	m.16296	atrina_contam.fasta	97343.1	1	52	83	230	0.0048	0.65	possibly correct	TRUE	02_1.33216.33216.2	IImEIANPIDADSGDYK	K	C	0.997	4.38	0.575	2		m3: Oxidation (+15.99)	940.951	1879.89	1880.89	2	0.000175	0.09304	5767.19	763331	1337650	292	308	TRUE
02_1	Uncategorized Sample	BioSample 1	02_1	g.16296 ORF g.16296 m.16296 type:internal len:869 (+) comp255592_c0_seq1:2-2611(+)	m.16296	atrina_contam.fasta	97343.1	1	52	83	230	0.0048	0.65	possibly correct	TRUE	02_1.33998.33998.2	IImEIANPIDADSGDYK	K	C	0.997	4.34	0.579	2		m3: Oxidation (+15.99)	940.951	1879.89	1880.89	2	0.000436	0.2318	5876.02	1112530	1220250	292	308	TRUE
02_1	Uncategorized Sample	BioSample 1	02_1	g.16296 ORF g.16296 m.16296 type:internal len:869 (+) comp255592_c0_seq1:2-2611(+)	m.16296	atrina_contam.fasta	97343.1	1	52	83	230	0.0048	0.65	possibly correct	TRUE	02_1.34159.34159.2	IImEIANPIDADSGDYK	K	C	0.997	4.35	0.585	2		m3: Oxidation (+15.99)	940.952	1879.89	1880.89	2	0.002178	1.158	5898.45	782230	953945	292	308	TRUE
02_1	Uncategorized Sample	BioSample 1	02_1	g.16296 ORF g.16296 m.16296 type:internal len:869 (+) comp255592_c0_seq1:2-2611(+)	m.16296	atrina_contam.fasta	97343.1	1	52	83	230	0.0048	0.65	possibly correct	TRUE	02_1.30933.30933.2	IImEIANPIDADSGDYK	K	C	0.997	4.17	0.606	2		m3: Oxidation (+15.99)	940.951	1879.89	1880.89	2	0.000244	0.1297	5454.48	1266940	1497030	292	308	TRUE
02_1	Uncategorized Sample	BioSample 1	02_1	g.16296 ORF g.16296 m.16296 type:internal len:869 (+) comp255592_c0_seq1:2-2611(+)	m.16296	atrina_contam.fasta	97343.1	1	52	83	230	0.0048	0.65	possibly correct	TRUE	02_1.33679.33679.2	IImEIANPIDADSGDYK	K	C	0.997	4.24	0.605	2		m3: Oxidation (+15.99)	940.951	1879.89	1880.89	2	0.000141	0.07496	5832.31	1132570	1402090	292	308	TRUE
02_1	Uncategorized Sample	BioSample 1	02_1	g.16296 ORF g.16296 m.16296 type:internal len:869 (+) comp255592_c0_seq1:2-2611(+)	m.16296	atrina_contam.fasta	97343.1	1	52	83	230	0.0048	0.65	possibly correct	TRUE	02_1.38863.38863.2	IIMEIANPIDADSGDYK	K	C	0.997	4.35	0.599	2			932.954	1863.89	1864.9	2	0.000588	0.3153	6555.95	584939	894968	292	308	TRUE
02_1	Uncategorized Sample	BioSample 1	02_1	g.16296 ORF g.16296 m.16296 type:internal len:869 (+) comp255592_c0_seq1:2-2611(+)	m.16296	atrina_contam.fasta	97343.1	1	52	83	230	0.0048	0.65	possibly correct	TRUE	02_1.30856.30856.3	IImEIANPIDADSGDYK	K	C	0.997	3.49	0.513	2		m3: Oxidation (+15.99)	627.636	1879.89	1880.89	3	-0.000427	-0.227	5444.16	312334	448204	292	308	TRUE
02_1	Uncategorized Sample	BioSample 1	02_1	g.16296 ORF g.16296 m.16296 type:internal len:869 (+) comp255592_c0_seq1:2-2611(+)	m.16296	atrina_contam.fasta	97343.1	1	52	83	230	0.0048	0.65	possibly correct	TRUE	02_1.38717.38717.2	IIMEIANPIDADSGDYK	K	C	0.997	4.85	0.614	2			932.954	1863.89	1864.9	2	0.000289	0.155	6534.63	9823920	16748800	292	308	TRUE
02_1	Uncategorized Sample	BioSample 1	02_1	g.16296 ORF g.16296 m.16296 type:internal len:869 (+) comp255592_c0_seq1:2-2611(+)	m.16296	atrina_contam.fasta	97343.1	1	52	83	230	0.0048	0.65	possibly correct	TRUE	02_1.33058.33058.2	ILLNVVQDNNVYK	R	I	0.997	3.42	0.381	2			766.922	1531.83	1531.85	2	0.9888	-9.083	5745.2	289469	439886	279	291	TRUE
02_1	Uncategorized Sample	BioSample 1	02_1	g.16296 ORF g.16296 m.16296 type:internal len:869 (+) comp255592_c0_seq1:2-2611(+)	m.16296	atrina_contam.fasta	97343.1	1	52	83	230	0.0048	0.65	possibly correct	TRUE	02_1.31624.31624.2	ILLNVVQDNNVYK	R	I	0.997	3.98	0.539	2			766.929	1531.84	1531.85	2	1.002	-0.2288	5548.54	451762	851211	279	291	TRUE
02_1	Uncategorized Sample	BioSample 1	02_1	g.16296 ORF g.16296 m.16296 type:internal len:869 (+) comp255592_c0_seq1:2-2611(+)	m.16296	atrina_contam.fasta	97343.1	1	52	83	230	0.0048	0.65	possibly correct	TRUE	02_1.32269.32269.2	ILLNVVQDNNVYK	R	I	0.997	4.19	0.573	2			766.427	1530.84	1531.85	2	-0.001839	-1.201	5635.75	459409	605797	279	291	TRUE
02_1	Uncategorized Sample	BioSample 1	02_1	g.16296 ORF g.16296 m.16296 type:internal len:869 (+) comp255592_c0_seq1:2-2611(+)	m.16296	atrina_contam.fasta	97343.1	1	52	83	230	0.0048	0.65	possibly correct	TRUE	02_1.31789.31789.2	ILLNVVQDNNVYK	R	I	0.997	4.06	0.599	2			766.428	1530.84	1531.85	2	0.000176	0.1149	5570.46	17401200	22230700	279	291	TRUE
02_1	Uncategorized Sample	BioSample 1	02_1	g.16296 ORF g.16296 m.16296 type:internal len:869 (+) comp255592_c0_seq1:2-2611(+)	m.16296	atrina_contam.fasta	97343.1	1	52	83	230	0.0048	0.65	possibly correct	TRUE	02_1.32110.32110.2	ILLNVVQDNNVYK	R	I	0.997	4.44	0.578	2			766.428	1530.84	1531.85	2	0.000443	0.2892	5613.89	751025	929575	279	291	TRUE
02_1	Uncategorized Sample	BioSample 1	02_1	g.16296 ORF g.16296 m.16296 type:internal len:869 (+) comp255592_c0_seq1:2-2611(+)	m.16296	atrina_contam.fasta	97343.1	1	52	83	230	0.0048	0.65	possibly correct	TRUE	02_1.31949.31949.2	ILLNVVQDNNVYK	R	I	0.997	4.12	0.631	2			766.428	1530.84	1531.85	2	0.001108	0.7233	5592.03	1273160	1867950	279	291	TRUE
02_1	Uncategorized Sample	BioSample 1	02_1	g.16296 ORF g.16296 m.16296 type:internal len:869 (+) comp255592_c0_seq1:2-2611(+)	m.16296	atrina_contam.fasta	97343.1	1	52	83	230	0.0048	0.65	possibly correct	TRUE	02_1.26203.26203.3	ITWFKENDELTDGR	K	F	0.997	2.86	0.438	2			575.281	1722.82	1723.83	3	-0.001715	-0.9949	4810.59	441087	162500	57	70	TRUE
02_1	Uncategorized Sample	BioSample 1	02_1	g.16296 ORF g.16296 m.16296 type:internal len:869 (+) comp255592_c0_seq1:2-2611(+)	m.16296	atrina_contam.fasta	97343.1	1	52	83	230	0.0048	0.65	possibly correct	TRUE	02_1.27159.27159.3	ITWFKENDELTDGR	K	F	0.997	3.24	0.422	2			575.281	1722.82	1723.83	3	-0.001567	-0.909	4941.31	1163750	239116	57	70	TRUE
02_1	Uncategorized Sample	BioSample 1	02_1	g.16296 ORF g.16296 m.16296 type:internal len:869 (+) comp255592_c0_seq1:2-2611(+)	m.16296	atrina_contam.fasta	97343.1	1	52	83	230	0.0048	0.65	possibly correct	TRUE	02_1.26502.26502.2	ITWFKENDELTDGR	K	F	0.997	3.22	0.549	2			862.418	1722.82	1723.83	2	-0.001074	-0.623	4850.97	1540000	2310260	57	70	TRUE
02_1	Uncategorized Sample	BioSample 1	02_1	g.16296 ORF g.16296 m.16296 type:internal len:869 (+) comp255592_c0_seq1:2-2611(+)	m.16296	atrina_contam.fasta	97343.1	1	52	83	230	0.0048	0.65	possibly correct	TRUE	02_1.26359.26359.3	ITWFKENDELTDGR	K	F	0.997	3.55	0.412	2			575.282	1722.82	1723.83	3	0.001448	0.84	4831.66	1503440	701478	57	70	TRUE
02_1	Uncategorized Sample	BioSample 1	02_1	g.16296 ORF g.16296 m.16296 type:internal len:869 (+) comp255592_c0_seq1:2-2611(+)	m.16296	atrina_contam.fasta	97343.1	1	52	83	230	0.0048	0.65	possibly correct	TRUE	02_1.26516.26516.3	ITWFKENDELTDGR	K	F	0.997	3.55	0.415	2			575.281	1722.82	1723.83	3	0.000281	0.163	4852.92	11234200	9416290	57	70	TRUE
02_1	Uncategorized Sample	BioSample 1	02_1	g.16296 ORF g.16296 m.16296 type:internal len:869 (+) comp255592_c0_seq1:2-2611(+)	m.16296	atrina_contam.fasta	97343.1	1	52	83	230	0.0048	0.65	possibly correct	TRUE	02_1.23896.23896.3	KEEPDKFITELEDQK	R	L	0.997	3.32	0.468	2			616.979	1847.92	1848.92	3	-0.000262	-0.1417	4501.16	252258	248387	788	802	TRUE
02_1	Uncategorized Sample	BioSample 1	02_1	g.16296 ORF g.16296 m.16296 type:internal len:869 (+) comp255592_c0_seq1:2-2611(+)	m.16296	atrina_contam.fasta	97343.1	1	52	83	230	0.0048	0.65	possibly correct	TRUE	02_1.24032.24032.2	KEEPDKFITELEDQK	R	L	0.997	5.88	0.508	2			925.468	1848.92	1848.92	2	1.005	1.324	4518.95	885456	2390040	788	802	TRUE
02_1	Uncategorized Sample	BioSample 1	02_1	g.16296 ORF g.16296 m.16296 type:internal len:869 (+) comp255592_c0_seq1:2-2611(+)	m.16296	atrina_contam.fasta	97343.1	1	52	83	230	0.0048	0.65	possibly correct	TRUE	02_1.24212.24212.3	KEEPDKFITELEDQK	R	L	0.997	5.37	0.454	2			616.98	1847.92	1848.92	3	0.001024	0.5538	4542.8	3465000	4040220	788	802	TRUE
02_1	Uncategorized Sample	BioSample 1	02_1	g.16296 ORF g.16296 m.16296 type:internal len:869 (+) comp255592_c0_seq1:2-2611(+)	m.16296	atrina_contam.fasta	97343.1	1	52	83	230	0.0048	0.65	possibly correct	TRUE	02_1.24052.24052.3	KEEPDKFITELEDQK	R	L	0.997	5.88	0.496	2			616.979	1847.92	1848.92	3	-9.2e-05	-0.04976	4521.62	16296300	19027800	788	802	TRUE
02_1	Uncategorized Sample	BioSample 1	02_1	g.16296 ORF g.16296 m.16296 type:internal len:869 (+) comp255592_c0_seq1:2-2611(+)	m.16296	atrina_contam.fasta	97343.1	1	52	83	230	0.0048	0.65	possibly correct	TRUE	02_1.24086.24086.3	KNAEDEEDIDWGSLKPVDK	K	K	0.995	3.16	0.392	2			730.347	2188.02	2188.04	3	0.9859	-7.687	4526.06	860496	798972	684	702	TRUE
02_1	Uncategorized Sample	BioSample 1	02_1	g.16296 ORF g.16296 m.16296 type:internal len:869 (+) comp255592_c0_seq1:2-2611(+)	m.16296	atrina_contam.fasta	97343.1	1	52	83	230	0.0048	0.65	possibly correct	TRUE	02_1.22818.22818.3	KNAEDEEDIDWGSLKPVDK	K	K	0.997	5.67	0.548	2			730.017	2187.03	2188.04	3	-0.003479	-1.59	4356.58	1825370	1757710	684	702	TRUE
02_1	Uncategorized Sample	BioSample 1	02_1	g.16296 ORF g.16296 m.16296 type:internal len:869 (+) comp255592_c0_seq1:2-2611(+)	m.16296	atrina_contam.fasta	97343.1	1	52	83	230	0.0048	0.65	possibly correct	TRUE	02_1.4617.4617.3	KPISASTYKPSYDK	K	G	0.997	4.64	0.542	2			528.948	1583.82	1584.83	3	0.001026	0.6474	1946.69	4503470	6406710	376	389	TRUE
02_1	Uncategorized Sample	BioSample 1	02_1	g.16296 ORF g.16296 m.16296 type:internal len:869 (+) comp255592_c0_seq1:2-2611(+)	m.16296	atrina_contam.fasta	97343.1	1	52	83	230	0.0048	0.65	possibly correct	TRUE	02_1.21798.21798.3	KPSVAPAIVVDDEGDEDGDIQK	R	D	0.997	4.19	0.571	2			766.375	2296.1	2297.11	3	-0.005519	-2.403	4221.77	425838	636952	518	539	TRUE
02_1	Uncategorized Sample	BioSample 1	02_1	g.16296 ORF g.16296 m.16296 type:internal len:869 (+) comp255592_c0_seq1:2-2611(+)	m.16296	atrina_contam.fasta	97343.1	1	52	83	230	0.0048	0.65	possibly correct	TRUE	02_1.24315.24315.4	KPSVAPAIVVDDEGDEDGDIQKDGEYETQGPR	R	K	0.997	4.12	0.505	2			858.148	3428.56	3429.59	4	-0.02377	-6.932	4556.42	795573	1794930	518	549	TRUE
02_1	Uncategorized Sample	BioSample 1	02_1	g.16296 ORF g.16296 m.16296 type:internal len:869 (+) comp255592_c0_seq1:2-2611(+)	m.16296	atrina_contam.fasta	97343.1	1	52	83	230	0.0048	0.65	possibly correct	TRUE	02_1.23614.23614.4	KPSVAPAIVVDDEGDEDGDIQKDGEYETQGPR	R	K	0.997	5.96	0.612	2			858.403	3429.58	3429.59	4	0.9974	-1.546	4463.21	806729	1550080	518	549	TRUE
02_1	Uncategorized Sample	BioSample 1	02_1	g.16296 ORF g.16296 m.16296 type:internal len:869 (+) comp255592_c0_seq1:2-2611(+)	m.16296	atrina_contam.fasta	97343.1	1	52	83	230	0.0048	0.65	possibly correct	TRUE	02_1.23771.23771.4	KPSVAPAIVVDDEGDEDGDIQKDGEYETQGPR	R	K	0.997	5.73	0.682	2			858.153	3428.58	3429.59	4	-0.004802	-1.4	4484.56	927503	1950610	518	549	TRUE
02_1	Uncategorized Sample	BioSample 1	02_1	g.16296 ORF g.16296 m.16296 type:internal len:869 (+) comp255592_c0_seq1:2-2611(+)	m.16296	atrina_contam.fasta	97343.1	1	52	83	230	0.0048	0.65	possibly correct	TRUE	02_1.24148.24148.4	KPSVAPAIVVDDEGDEDGDIQKDGEYETQGPR	R	K	0.997	6.65	0.686	2			858.158	3428.6	3429.59	4	0.01668	4.863	4534.39	4572130	9993480	518	549	TRUE
02_1	Uncategorized Sample	BioSample 1	02_1	g.16296 ORF g.16296 m.16296 type:internal len:869 (+) comp255592_c0_seq1:2-2611(+)	m.16296	atrina_contam.fasta	97343.1	1	52	83	230	0.0048	0.65	possibly correct	TRUE	02_1.24104.24104.3	KPSVAPAIVVDDEGDEDGDIQKDGEYETQGPR	R	K	0.997	6.94	0.724	2			1144.2	3429.59	3429.59	3	1.006	1.041	4528.52	1002530	2489910	518	549	TRUE
02_1	Uncategorized Sample	BioSample 1	02_1	g.16296 ORF g.16296 m.16296 type:internal len:869 (+) comp255592_c0_seq1:2-2611(+)	m.16296	atrina_contam.fasta	97343.1	1	52	83	230	0.0048	0.65	possibly correct	TRUE	02_1.9970.9970.4	KPSVDKLEAMEQQR	K	R	0.996	2.74	0.337	2			415.469	1657.85	1658.85	4	0.000125	0.07535	2656.74	1505980	2002690	747	760	TRUE
02_1	Uncategorized Sample	BioSample 1	02_1	g.16296 ORF g.16296 m.16296 type:internal len:869 (+) comp255592_c0_seq1:2-2611(+)	m.16296	atrina_contam.fasta	97343.1	1	52	83	230	0.0048	0.65	possibly correct	TRUE	02_1.10130.10130.4	KPSVDKLEAMEQQR	K	R	0.997	2.92	0.389	2			415.468	1657.84	1658.85	4	-0.001647	-0.9929	2678.99	8141650	4987850	747	760	TRUE
02_1	Uncategorized Sample	BioSample 1	02_1	g.16296 ORF g.16296 m.16296 type:internal len:869 (+) comp255592_c0_seq1:2-2611(+)	m.16296	atrina_contam.fasta	97343.1	1	52	83	230	0.0048	0.65	possibly correct	TRUE	02_1.6958.6958.3	KPSVDKLEAmEQQR	K	R	0.997	2.91	0.408	2		m10: Oxidation (+15.99)	558.954	1673.84	1674.85	3	0.000135	0.0806	2257.59	459680	408904	747	760	TRUE
02_1	Uncategorized Sample	BioSample 1	02_1	g.16296 ORF g.16296 m.16296 type:internal len:869 (+) comp255592_c0_seq1:2-2611(+)	m.16296	atrina_contam.fasta	97343.1	1	52	83	230	0.0048	0.65	possibly correct	TRUE	02_1.4369.4369.3	KPSVDKLEAmEQQR	K	R	0.997	3.2	0.402	2		m10: Oxidation (+15.99)	558.954	1673.84	1674.85	3	0.00061	0.3642	1914.38	1303530	1622960	747	760	TRUE
02_1	Uncategorized Sample	BioSample 1	02_1	g.16296 ORF g.16296 m.16296 type:internal len:869 (+) comp255592_c0_seq1:2-2611(+)	m.16296	atrina_contam.fasta	97343.1	1	52	83	230	0.0048	0.65	possibly correct	TRUE	02_1.7367.7367.3	KPSVDKLEAmEQQR	K	R	0.997	3.12	0.487	2		m10: Oxidation (+15.99)	558.955	1673.84	1674.85	3	0.001986	1.186	2312.27	650532	666464	747	760	TRUE
02_1	Uncategorized Sample	BioSample 1	02_1	g.16296 ORF g.16296 m.16296 type:internal len:869 (+) comp255592_c0_seq1:2-2611(+)	m.16296	atrina_contam.fasta	97343.1	1	52	83	230	0.0048	0.65	possibly correct	TRUE	02_1.9946.9946.3	KPSVDKLEAMEQQR	K	R	0.997	3.76	0.453	2			553.957	1658.85	1658.85	3	1.005	1.188	2653.39	567901	500998	747	760	TRUE
02_1	Uncategorized Sample	BioSample 1	02_1	g.16296 ORF g.16296 m.16296 type:internal len:869 (+) comp255592_c0_seq1:2-2611(+)	m.16296	atrina_contam.fasta	97343.1	1	52	83	230	0.0048	0.65	possibly correct	TRUE	02_1.4210.4210.3	KPSVDKLEAmEQQR	K	R	0.997	3.62	0.485	2		m10: Oxidation (+15.99)	558.955	1673.84	1674.85	3	0.002124	1.268	1893.48	1070500	1106830	747	760	TRUE
02_1	Uncategorized Sample	BioSample 1	02_1	g.16296 ORF g.16296 m.16296 type:internal len:869 (+) comp255592_c0_seq1:2-2611(+)	m.16296	atrina_contam.fasta	97343.1	1	52	83	230	0.0048	0.65	possibly correct	TRUE	02_1.10256.10256.3	KPSVDKLEAMEQQR	K	R	0.997	4.16	0.484	2			553.623	1657.85	1658.85	3	-0.000233	-0.1405	2695.79	1123020	694836	747	760	TRUE
02_1	Uncategorized Sample	BioSample 1	02_1	g.16296 ORF g.16296 m.16296 type:internal len:869 (+) comp255592_c0_seq1:2-2611(+)	m.16296	atrina_contam.fasta	97343.1	1	52	83	230	0.0048	0.65	possibly correct	TRUE	02_1.10098.10098.3	KPSVDKLEAMEQQR	K	R	0.997	4.65	0.577	2			553.623	1657.85	1658.85	3	0.000162	0.09766	2674.81	13592800	10614400	747	760	TRUE
02_1	Uncategorized Sample	BioSample 1	02_1	g.16296 ORF g.16296 m.16296 type:internal len:869 (+) comp255592_c0_seq1:2-2611(+)	m.16296	atrina_contam.fasta	97343.1	1	52	83	230	0.0048	0.65	possibly correct	TRUE	02_1.14898.14898.3	LEDGGKYSLEINK	K	-	0.98	2.94	0.357	2			489.257	1464.75	1465.75	3	0.002623	1.79	3310.85	624696	343756	856	868	TRUE
02_1	Uncategorized Sample	BioSample 1	02_1	g.16296 ORF g.16296 m.16296 type:internal len:869 (+) comp255592_c0_seq1:2-2611(+)	m.16296	atrina_contam.fasta	97343.1	1	52	83	230	0.0048	0.65	possibly correct	TRUE	02_1.14577.14577.3	LEDGGKYSLEINK	K	-	0.997	3.3	0.377	2			489.256	1464.75	1465.75	3	-0.000289	-0.1972	3268.61	1512920	850819	856	868	TRUE
02_1	Uncategorized Sample	BioSample 1	02_1	g.16296 ORF g.16296 m.16296 type:internal len:869 (+) comp255592_c0_seq1:2-2611(+)	m.16296	atrina_contam.fasta	97343.1	1	52	83	230	0.0048	0.65	possibly correct	TRUE	02_1.14734.14734.3	LEDGGKYSLEINK	K	-	0.997	3.67	0.385	2			489.256	1464.75	1465.75	3	0.000269	0.1835	3289.41	5427620	2669200	856	868	TRUE
02_1	Uncategorized Sample	BioSample 1	02_1	g.16296 ORF g.16296 m.16296 type:internal len:869 (+) comp255592_c0_seq1:2-2611(+)	m.16296	atrina_contam.fasta	97343.1	1	52	83	230	0.0048	0.65	possibly correct	TRUE	02_1.12431.12431.2	LEIFAGHR	K	Y	0.989	2.3	0.377	2			471.762	941.509	942.516	2	0.000171	0.1814	2984.11	5763650	3706660	830	837	TRUE
02_1	Uncategorized Sample	BioSample 1	02_1	g.16296 ORF g.16296 m.16296 type:internal len:869 (+) comp255592_c0_seq1:2-2611(+)	m.16296	atrina_contam.fasta	97343.1	1	52	83	230	0.0048	0.65	possibly correct	TRUE	02_1.12433.12433.3	LEVIPVKKPSVDK	K	L	0.997	2.76	0.467	2			484.633	1450.88	1451.88	3	0.000226	0.1557	2984.37	1008110	891007	740	752	TRUE
02_1	Uncategorized Sample	BioSample 1	02_1	g.16296 ORF g.16296 m.16296 type:internal len:869 (+) comp255592_c0_seq1:2-2611(+)	m.16296	atrina_contam.fasta	97343.1	1	52	83	230	0.0048	0.65	possibly correct	TRUE	02_1.17958.17958.2	LIVEQTVVSQSK	K	P	0.997	3.28	0.463	2			665.883	1329.75	1330.76	2	3.2e-05	0.02405	3716.18	7593140	9754840	250	261	TRUE
02_1	Uncategorized Sample	BioSample 1	02_1	g.16296 ORF g.16296 m.16296 type:internal len:869 (+) comp255592_c0_seq1:2-2611(+)	m.16296	atrina_contam.fasta	97343.1	1	52	83	230	0.0048	0.65	possibly correct	TRUE	02_1.34418.34418.4	LIVEQTVVSQSKPTAmWYFGNKPIK	K	S	0.991	2.57	0.479	2		m16: Oxidation (+15.99)	720.888	2879.52	2880.53	4	-0.002071	-0.719	5934.24	384537	166469	250	274	TRUE
02_1	Uncategorized Sample	BioSample 1	02_1	g.16296 ORF g.16296 m.16296 type:internal len:869 (+) comp255592_c0_seq1:2-2611(+)	m.16296	atrina_contam.fasta	97343.1	1	52	83	230	0.0048	0.65	possibly correct	TRUE	02_1.33087.33087.4	LIVEQTVVSQSKPTAmWYFGNKPIK	K	S	0.994	2.82	0.412	2		m16: Oxidation (+15.99)	720.889	2879.53	2880.53	4	0.001582	0.5492	5749.13	671722	227980	250	274	TRUE
02_1	Uncategorized Sample	BioSample 1	02_1	g.16296 ORF g.16296 m.16296 type:internal len:869 (+) comp255592_c0_seq1:2-2611(+)	m.16296	atrina_contam.fasta	97343.1	1	52	83	230	0.0048	0.65	possibly correct	TRUE	02_1.33245.33245.4	LIVEQTVVSQSKPTAmWYFGNKPIK	K	S	0.997	2.81	0.481	2		m16: Oxidation (+15.99)	720.889	2879.53	2880.53	4	0.002294	0.7964	5771.4	364941	217967	250	274	TRUE
02_1	Uncategorized Sample	BioSample 1	02_1	g.16296 ORF g.16296 m.16296 type:internal len:869 (+) comp255592_c0_seq1:2-2611(+)	m.16296	atrina_contam.fasta	97343.1	1	52	83	230	0.0048	0.65	possibly correct	TRUE	02_1.36846.36846.4	LIVEQTVVSQSKPTAMWYFGNKPIK	K	S	0.997	2.53	0.508	2			716.89	2863.53	2864.54	4	0.001148	0.4008	6272.38	267683	141060	250	274	TRUE
02_1	Uncategorized Sample	BioSample 1	02_1	g.16296 ORF g.16296 m.16296 type:internal len:869 (+) comp255592_c0_seq1:2-2611(+)	m.16296	atrina_contam.fasta	97343.1	1	52	83	230	0.0048	0.65	possibly correct	TRUE	02_1.34574.34574.4	LIVEQTVVSQSKPTAmWYFGNKPIK	K	S	0.997	2.91	0.447	2		m16: Oxidation (+15.99)	720.889	2879.53	2880.53	4	0.002999	1.041	5955.97	481844	361884	250	274	TRUE
02_1	Uncategorized Sample	BioSample 1	02_1	g.16296 ORF g.16296 m.16296 type:internal len:869 (+) comp255592_c0_seq1:2-2611(+)	m.16296	atrina_contam.fasta	97343.1	1	52	83	230	0.0048	0.65	possibly correct	TRUE	02_1.34929.34929.4	LIVEQTVVSQSKPTAmWYFGNKPIK	K	S	0.997	3.46	0.424	2		m16: Oxidation (+15.99)	720.889	2879.53	2880.53	4	0.002684	0.9318	6005.62	425411	1084520	250	274	TRUE
02_1	Uncategorized Sample	BioSample 1	02_1	g.16296 ORF g.16296 m.16296 type:internal len:869 (+) comp255592_c0_seq1:2-2611(+)	m.16296	atrina_contam.fasta	97343.1	1	52	83	230	0.0048	0.65	possibly correct	TRUE	02_1.34760.34760.3	LIVEQTVVSQSKPTAmWYFGNKPIK	K	S	0.997	3.6	0.454	2		m16: Oxidation (+15.99)	961.182	2880.52	2880.53	3	0.9975	-1.819	5981.8	231409	430322	250	274	TRUE
02_1	Uncategorized Sample	BioSample 1	02_1	g.16296 ORF g.16296 m.16296 type:internal len:869 (+) comp255592_c0_seq1:2-2611(+)	m.16296	atrina_contam.fasta	97343.1	1	52	83	230	0.0048	0.65	possibly correct	TRUE	02_1.34601.34601.3	LIVEQTVVSQSKPTAmWYFGNKPIK	K	S	0.997	3.95	0.587	2		m16: Oxidation (+15.99)	961.184	2880.53	2880.53	3	1.003	0.2628	5959.64	270491	389646	250	274	TRUE
02_1	Uncategorized Sample	BioSample 1	02_1	g.16296 ORF g.16296 m.16296 type:internal len:869 (+) comp255592_c0_seq1:2-2611(+)	m.16296	atrina_contam.fasta	97343.1	1	52	83	230	0.0048	0.65	possibly correct	TRUE	02_1.33103.33103.3	LIVEQTVVSQSKPTAmWYFGNKPIK	K	S	0.997	4.46	0.62	2		m16: Oxidation (+15.99)	960.851	2879.53	2880.53	3	0.005045	1.751	5751.37	413427	711142	250	274	TRUE
02_1	Uncategorized Sample	BioSample 1	02_1	g.16296 ORF g.16296 m.16296 type:internal len:869 (+) comp255592_c0_seq1:2-2611(+)	m.16296	atrina_contam.fasta	97343.1	1	52	83	230	0.0048	0.65	possibly correct	TRUE	02_1.34733.34733.4	LIVEQTVVSQSKPTAmWYFGNKPIK	K	S	0.997	5.24	0.637	2		m16: Oxidation (+15.99)	720.889	2879.53	2880.53	4	0.001571	0.5454	5978.13	610579	890279	250	274	TRUE
02_1	Uncategorized Sample	BioSample 1	02_1	g.16296 ORF g.16296 m.16296 type:internal len:869 (+) comp255592_c0_seq1:2-2611(+)	m.16296	atrina_contam.fasta	97343.1	1	52	83	230	0.0048	0.65	possibly correct	TRUE	02_1.36701.36701.3	LIVEQTVVSQSKPTAMWYFGNKPIK	K	S	0.997	6.56	0.603	2			955.517	2863.53	2864.54	3	-0.000587	-0.2049	6252.24	2287880	5040930	250	274	TRUE
02_1	Uncategorized Sample	BioSample 1	02_1	g.16296 ORF g.16296 m.16296 type:internal len:869 (+) comp255592_c0_seq1:2-2611(+)	m.16296	atrina_contam.fasta	97343.1	1	52	83	230	0.0048	0.65	possibly correct	TRUE	02_1.36686.36686.4	LIVEQTVVSQSKPTAMWYFGNKPIK	K	S	0.997	5.36	0.646	2			716.89	2863.53	2864.54	4	0.001422	0.4964	6250.13	6065750	3119470	250	274	TRUE
02_1	Uncategorized Sample	BioSample 1	02_1	g.16296 ORF g.16296 m.16296 type:internal len:869 (+) comp255592_c0_seq1:2-2611(+)	m.16296	atrina_contam.fasta	97343.1	1	52	83	230	0.0048	0.65	possibly correct	TRUE	02_1.36528.36528.4	LIVEQTVVSQSKPTAMWYFGNKPIK	K	S	0.997	3.83	0.715	2			716.891	2863.53	2864.54	4	0.002417	0.8438	6228.24	525361	281355	250	274	TRUE
02_1	Uncategorized Sample	BioSample 1	02_1	g.16296 ORF g.16296 m.16296 type:internal len:869 (+) comp255592_c0_seq1:2-2611(+)	m.16296	atrina_contam.fasta	97343.1	1	52	83	230	0.0048	0.65	possibly correct	TRUE	02_1.36543.36543.3	LIVEQTVVSQSKPTAMWYFGNKPIK	K	S	0.997	5.78	0.657	2			955.516	2863.53	2864.54	3	-0.003399	-1.187	6230.34	511627	776802	250	274	TRUE
02_1	Uncategorized Sample	BioSample 1	02_1	g.16296 ORF g.16296 m.16296 type:internal len:869 (+) comp255592_c0_seq1:2-2611(+)	m.16296	atrina_contam.fasta	97343.1	1	52	83	230	0.0048	0.65	possibly correct	TRUE	02_1.28228.28228.3	NAEDEEDIDWGSLKPVDK	K	K	0.983	2.88	0.326	2			687.655	2059.94	2059.95	3	1.005	0.9085	5087.69	942926	2561050	685	702	TRUE
02_1	Uncategorized Sample	BioSample 1	02_1	g.16296 ORF g.16296 m.16296 type:internal len:869 (+) comp255592_c0_seq1:2-2611(+)	m.16296	atrina_contam.fasta	97343.1	1	52	83	230	0.0048	0.65	possibly correct	TRUE	02_1.33163.33163.2	NAEDEEDIDWGSLKPVDK	K	K	0.997	3.12	0.547	2			1030.97	2059.92	2059.95	2	0.9839	-9.147	5759.46	187933	104261	685	702	TRUE
02_1	Uncategorized Sample	BioSample 1	02_1	g.16296 ORF g.16296 m.16296 type:internal len:869 (+) comp255592_c0_seq1:2-2611(+)	m.16296	atrina_contam.fasta	97343.1	1	52	83	230	0.0048	0.65	possibly correct	TRUE	02_1.28116.28116.2	NAEDEEDIDWGSLKPVDK	K	K	0.997	5.87	0.639	2			1030.48	2058.94	2059.95	2	0.005049	2.451	5071.89	2366560	3995220	685	702	TRUE
02_1	Uncategorized Sample	BioSample 1	02_1	g.16296 ORF g.16296 m.16296 type:internal len:869 (+) comp255592_c0_seq1:2-2611(+)	m.16296	atrina_contam.fasta	97343.1	1	52	83	230	0.0048	0.65	possibly correct	TRUE	02_1.28070.28070.3	NAEDEEDIDWGSLKPVDK	K	K	0.997	5.26	0.567	2			687.32	2058.94	2059.95	3	0.000397	0.1927	5065.13	1331200	2253080	685	702	TRUE
02_1	Uncategorized Sample	BioSample 1	02_1	g.16296 ORF g.16296 m.16296 type:internal len:869 (+) comp255592_c0_seq1:2-2611(+)	m.16296	atrina_contam.fasta	97343.1	1	52	83	230	0.0048	0.65	possibly correct	TRUE	02_1.22322.22322.4	NAEDEEDIDWGSLKPVDKK	K	R	0.997	3.08	0.405	2			547.766	2187.03	2188.04	4	0.001015	0.4639	4291.19	4088030	341260	685	703	TRUE
02_1	Uncategorized Sample	BioSample 1	02_1	g.16296 ORF g.16296 m.16296 type:internal len:869 (+) comp255592_c0_seq1:2-2611(+)	m.16296	atrina_contam.fasta	97343.1	1	52	83	230	0.0048	0.65	possibly correct	TRUE	02_1.22165.22165.4	NAEDEEDIDWGSLKPVDKK	K	R	0.997	3.4	0.454	2			547.766	2187.03	2188.04	4	0.000891	0.4072	4270.25	2170030	263465	685	703	TRUE
02_1	Uncategorized Sample	BioSample 1	02_1	g.16296 ORF g.16296 m.16296 type:internal len:869 (+) comp255592_c0_seq1:2-2611(+)	m.16296	atrina_contam.fasta	97343.1	1	52	83	230	0.0048	0.65	possibly correct	TRUE	02_1.22291.22291.3	NAEDEEDIDWGSLKPVDKK	K	R	0.997	5.66	0.62	2			730.018	2187.03	2188.04	3	-0.001054	-0.4817	4287.01	4074590	5914820	685	703	TRUE
02_1	Uncategorized Sample	BioSample 1	02_1	g.16296 ORF g.16296 m.16296 type:internal len:869 (+) comp255592_c0_seq1:2-2611(+)	m.16296	atrina_contam.fasta	97343.1	1	52	83	230	0.0048	0.65	possibly correct	TRUE	02_1.26765.26765.2	NDSGEGSANITINLEGPK	K	E	0.997	3.52	0.67	2			908.44	1814.86	1815.87	2	-2.2e-05	-0.01212	4886.93	376305	264728	212	229	TRUE
02_1	Uncategorized Sample	BioSample 1	02_1	g.16296 ORF g.16296 m.16296 type:internal len:869 (+) comp255592_c0_seq1:2-2611(+)	m.16296	atrina_contam.fasta	97343.1	1	52	83	230	0.0048	0.65	possibly correct	TRUE	02_1.26920.26920.2	NDSGEGSANITINLEGPK	K	E	0.997	4.1	0.668	2			908.441	1814.87	1815.87	2	0.003029	1.668	4908.3	386911	304519	212	229	TRUE
02_1	Uncategorized Sample	BioSample 1	02_1	g.16296 ORF g.16296 m.16296 type:internal len:869 (+) comp255592_c0_seq1:2-2611(+)	m.16296	atrina_contam.fasta	97343.1	1	52	83	230	0.0048	0.65	possibly correct	TRUE	02_1.35102.35102.3	NDSGEGSANITINLEGPKEDGPVLK	K	E	0.997	4.42	0.593	2			852.422	2554.24	2554.26	3	0.9873	-6.04	6029.78	315098	356095	212	236	TRUE
02_1	Uncategorized Sample	BioSample 1	02_1	g.16296 ORF g.16296 m.16296 type:internal len:869 (+) comp255592_c0_seq1:2-2611(+)	m.16296	atrina_contam.fasta	97343.1	1	52	83	230	0.0048	0.65	possibly correct	TRUE	02_1.31423.31423.3	NDSGEGSANITINLEGPKEDGPVLK	K	E	0.997	4.76	0.581	2			852.425	2554.25	2554.26	3	0.9975	-2.046	5522	507227	406316	212	236	TRUE
02_1	Uncategorized Sample	BioSample 1	02_1	g.16296 ORF g.16296 m.16296 type:internal len:869 (+) comp255592_c0_seq1:2-2611(+)	m.16296	atrina_contam.fasta	97343.1	1	52	83	230	0.0048	0.65	possibly correct	TRUE	02_1.34949.34949.3	NDSGEGSANITINLEGPKEDGPVLK	K	E	0.997	4.49	0.661	2			852.421	2554.24	2554.26	3	0.9855	-6.742	6008.56	344761	412647	212	236	TRUE
02_1	Uncategorized Sample	BioSample 1	02_1	g.16296 ORF g.16296 m.16296 type:internal len:869 (+) comp255592_c0_seq1:2-2611(+)	m.16296	atrina_contam.fasta	97343.1	1	52	83	230	0.0048	0.65	possibly correct	TRUE	02_1.30778.30778.3	NDSGEGSANITINLEGPKEDGPVLK	K	E	0.997	5.44	0.633	2			852.426	2554.26	2554.26	3	0.999	-1.459	5433.64	694965	932502	212	236	TRUE
02_1	Uncategorized Sample	BioSample 1	02_1	g.16296 ORF g.16296 m.16296 type:internal len:869 (+) comp255592_c0_seq1:2-2611(+)	m.16296	atrina_contam.fasta	97343.1	1	52	83	230	0.0048	0.65	possibly correct	TRUE	02_1.30329.30329.3	NDSGEGSANITINLEGPKEDGPVLK	K	E	0.997	4.91	0.654	2			852.093	2553.26	2554.26	3	0.002382	0.9326	5371.9	386131	686475	212	236	TRUE
02_1	Uncategorized Sample	BioSample 1	02_1	g.16296 ORF g.16296 m.16296 type:internal len:869 (+) comp255592_c0_seq1:2-2611(+)	m.16296	atrina_contam.fasta	97343.1	1	52	83	230	0.0048	0.65	possibly correct	TRUE	02_1.30484.30484.3	NDSGEGSANITINLEGPKEDGPVLK	K	E	0.997	6.06	0.637	2			852.093	2553.26	2554.26	3	0.001123	0.4397	5393.74	9765030	18480000	212	236	TRUE
02_1	Uncategorized Sample	BioSample 1	02_1	g.16296 ORF g.16296 m.16296 type:internal len:869 (+) comp255592_c0_seq1:2-2611(+)	m.16296	atrina_contam.fasta	97343.1	1	52	83	230	0.0048	0.65	possibly correct	TRUE	02_1.31253.31253.3	NDSGEGSANITINLEGPKEDGPVLK	K	E	0.997	5.55	0.666	2			852.095	2553.26	2554.26	3	0.006752	2.643	5498.92	629820	1189700	212	236	TRUE
02_1	Uncategorized Sample	BioSample 1	02_1	g.16296 ORF g.16296 m.16296 type:internal len:869 (+) comp255592_c0_seq1:2-2611(+)	m.16296	atrina_contam.fasta	97343.1	1	52	83	230	0.0048	0.65	possibly correct	TRUE	02_1.31094.31094.3	NDSGEGSANITINLEGPKEDGPVLK	K	E	0.997	5.6	0.665	2			852.094	2553.26	2554.26	3	0.003348	1.311	5476.68	466180	880810	212	236	TRUE
02_1	Uncategorized Sample	BioSample 1	02_1	g.16296 ORF g.16296 m.16296 type:internal len:869 (+) comp255592_c0_seq1:2-2611(+)	m.16296	atrina_contam.fasta	97343.1	1	52	83	230	0.0048	0.65	possibly correct	TRUE	02_1.30941.30941.3	NDSGEGSANITINLEGPKEDGPVLK	K	E	0.997	4.91	0.756	2			852.092	2553.25	2554.26	3	-0.001799	-0.7043	5455.49	549310	413786	212	236	TRUE
02_1	Uncategorized Sample	BioSample 1	02_1	g.16296 ORF g.16296 m.16296 type:internal len:869 (+) comp255592_c0_seq1:2-2611(+)	m.16296	atrina_contam.fasta	97343.1	1	52	83	230	0.0048	0.65	possibly correct	TRUE	02_1.42160.42160.2	NLIIEcAcNASPNPSLTWYK	K	E	0.997	4.89	0.737	2	c6: Carbamidomethyl (+57.02), c8: Carbamidomethyl (+57.02)		1175.56	2349.1	2351.12	2	-1.007	-1.934	7030.56	156611	432589	148	167	TRUE
02_1	Uncategorized Sample	BioSample 1	02_1	g.16296 ORF g.16296 m.16296 type:internal len:869 (+) comp255592_c0_seq1:2-2611(+)	m.16296	atrina_contam.fasta	97343.1	1	52	83	230	0.0048	0.65	possibly correct	TRUE	02_1.42303.42303.2	NLIIEcAcNASPNPSLTWYK	K	E	0.997	6.05	0.681	2	c6: Carbamidomethyl (+57.02), c8: Carbamidomethyl (+57.02)		1176.56	2351.11	2351.12	2	1.003	-0.07706	7052.37	2696060	4461400	148	167	TRUE
02_1	Uncategorized Sample	BioSample 1	02_1	g.16296 ORF g.16296 m.16296 type:internal len:869 (+) comp255592_c0_seq1:2-2611(+)	m.16296	atrina_contam.fasta	97343.1	1	52	83	230	0.0048	0.65	possibly correct	TRUE	02_1.42188.42188.3	NLIIEcAcNASPNPSLTWYK	K	E	0.997	4.79	0.693	2	c6: Carbamidomethyl (+57.02), c8: Carbamidomethyl (+57.02)		784.377	2350.11	2351.12	3	0.001633	0.6947	7034.89	412529	950639	148	167	TRUE
02_1	Uncategorized Sample	BioSample 1	02_1	g.16296 ORF g.16296 m.16296 type:internal len:869 (+) comp255592_c0_seq1:2-2611(+)	m.16296	atrina_contam.fasta	97343.1	1	52	83	230	0.0048	0.65	possibly correct	TRUE	02_1.32104.32104.2	NQFGSAFcSATLGVK	K	E	0.997	2.97	0.411	2	c8: Carbamidomethyl (+57.02)		794.388	1586.76	1586.76	2	1.006	2.005	5612.98	297546	352542	413	427	TRUE
02_1	Uncategorized Sample	BioSample 1	02_1	g.16296 ORF g.16296 m.16296 type:internal len:869 (+) comp255592_c0_seq1:2-2611(+)	m.16296	atrina_contam.fasta	97343.1	1	52	83	230	0.0048	0.65	possibly correct	TRUE	02_1.31727.31727.3	NQFGSAFcSATLGVK	K	E	0.997	2.21	0.568	2	c8: Carbamidomethyl (+57.02)		529.593	1585.76	1586.76	3	-0.0001023	-0.06447	5562.01	451653	302842	413	427	TRUE
02_1	Uncategorized Sample	BioSample 1	02_1	g.16296 ORF g.16296 m.16296 type:internal len:869 (+) comp255592_c0_seq1:2-2611(+)	m.16296	atrina_contam.fasta	97343.1	1	52	83	230	0.0048	0.65	possibly correct	TRUE	02_1.31569.31569.3	NQFGSAFcSATLGVK	K	E	0.997	2.7	0.539	2	c8: Carbamidomethyl (+57.02)		529.594	1585.76	1586.76	3	0.003406	2.146	5541.24	281836	134157	413	427	TRUE
02_1	Uncategorized Sample	BioSample 1	02_1	g.16296 ORF g.16296 m.16296 type:internal len:869 (+) comp255592_c0_seq1:2-2611(+)	m.16296	atrina_contam.fasta	97343.1	1	52	83	230	0.0048	0.65	possibly correct	TRUE	02_1.31532.31532.2	NQFGSAFcSATLGVK	K	E	0.997	4.22	0.63	2	c8: Carbamidomethyl (+57.02)		794.388	1586.76	1586.76	2	1.006	2.257	5536.17	524409	1355050	413	427	TRUE
02_1	Uncategorized Sample	BioSample 1	02_1	g.16296 ORF g.16296 m.16296 type:internal len:869 (+) comp255592_c0_seq1:2-2611(+)	m.16296	atrina_contam.fasta	97343.1	1	52	83	230	0.0048	0.65	possibly correct	TRUE	02_1.31693.31693.2	NQFGSAFcSATLGVK	K	E	0.997	4.11	0.612	2	c8: Carbamidomethyl (+57.02)		793.885	1585.76	1586.76	2	-0.0001353	-0.08527	5557.52	15499900	16608300	413	427	TRUE
02_1	Uncategorized Sample	BioSample 1	02_1	g.16296 ORF g.16296 m.16296 type:internal len:869 (+) comp255592_c0_seq1:2-2611(+)	m.16296	atrina_contam.fasta	97343.1	1	52	83	230	0.0048	0.65	possibly correct	TRUE	02_1.27524.27524.2	NVTDGDAVDFIAK	K	V	0.997	3.25	0.444	2			682.838	1363.66	1364.67	2	-0.00011	-0.08061	4990.36	32672300	28506400	348	360	TRUE
02_1	Uncategorized Sample	BioSample 1	02_1	g.16296 ORF g.16296 m.16296 type:internal len:869 (+) comp255592_c0_seq1:2-2611(+)	m.16296	atrina_contam.fasta	97343.1	1	52	83	230	0.0048	0.65	possibly correct	TRUE	02_1.27685.27685.2	NVTDGDAVDFIAK	K	V	0.997	3.32	0.464	2			682.838	1363.66	1364.67	2	-0.000238	-0.1744	5011.75	1363070	1206860	348	360	TRUE
02_1	Uncategorized Sample	BioSample 1	02_1	g.16296 ORF g.16296 m.16296 type:internal len:869 (+) comp255592_c0_seq1:2-2611(+)	m.16296	atrina_contam.fasta	97343.1	1	52	83	230	0.0048	0.65	possibly correct	TRUE	02_1.27845.27845.2	NVTDGDAVDFIAK	K	V	0.997	3.14	0.489	2			682.839	1363.66	1364.67	2	0.000857	0.628	5034.22	655179	575422	348	360	TRUE
02_1	Uncategorized Sample	BioSample 1	02_1	g.16296 ORF g.16296 m.16296 type:internal len:869 (+) comp255592_c0_seq1:2-2611(+)	m.16296	atrina_contam.fasta	97343.1	1	52	83	230	0.0048	0.65	possibly correct	TRUE	02_1.27368.27368.2	NVTDGDAVDFIAK	K	V	0.997	3.44	0.501	2			682.839	1363.66	1364.67	2	0.000465	0.3407	4969.45	1054550	1131370	348	360	TRUE
02_1	Uncategorized Sample	BioSample 1	02_1	g.16296 ORF g.16296 m.16296 type:internal len:869 (+) comp255592_c0_seq1:2-2611(+)	m.16296	atrina_contam.fasta	97343.1	1	52	83	230	0.0048	0.65	possibly correct	TRUE	02_1.26822.26822.2	NVTDGDAVDFIAK	K	V	0.997	3.37	0.513	2			682.838	1363.66	1364.67	2	5.7e-05	0.04177	4894.87	747832	818681	348	360	TRUE
02_1	Uncategorized Sample	BioSample 1	02_1	g.16296 ORF g.16296 m.16296 type:internal len:869 (+) comp255592_c0_seq1:2-2611(+)	m.16296	atrina_contam.fasta	97343.1	1	52	83	230	0.0048	0.65	possibly correct	TRUE	02_1.28016.28016.2	NVTDGDAVDFIAK	K	V	0.997	3.1	0.556	2			682.838	1363.66	1364.67	2	-0.001522	-1.115	5057.56	467202	394065	348	360	TRUE
02_1	Uncategorized Sample	BioSample 1	02_1	g.16296 ORF g.16296 m.16296 type:internal len:869 (+) comp255592_c0_seq1:2-2611(+)	m.16296	atrina_contam.fasta	97343.1	1	52	83	230	0.0048	0.65	possibly correct	TRUE	02_1.28488.28488.2	PTAMWYFGNKPIK	K	S	0.997	3.2	0.534	2			776.902	1551.79	1552.8	2	-0.00161	-1.037	5123.37	153492	258677	262	274	TRUE
02_1	Uncategorized Sample	BioSample 1	02_1	g.16296 ORF g.16296 m.16296 type:internal len:869 (+) comp255592_c0_seq1:2-2611(+)	m.16296	atrina_contam.fasta	97343.1	1	52	83	230	0.0048	0.65	possibly correct	TRUE	02_1.43270.43270.3	RASLVDLIPDWPTLQHR	R	E	0.986	2.37	0.427	2			673.038	2016.09	2017.1	3	0.001388	0.6881	7194.2	357385	128541	768	784	TRUE
02_1	Uncategorized Sample	BioSample 1	02_1	g.16296 ORF g.16296 m.16296 type:internal len:869 (+) comp255592_c0_seq1:2-2611(+)	m.16296	atrina_contam.fasta	97343.1	1	52	83	230	0.0048	0.65	possibly correct	TRUE	02_1.43165.43165.4	RASLVDLIPDWPTLQHR	R	E	0.997	2.91	0.509	2			505.03	2016.09	2017.1	4	0.000197	0.09767	7179.04	2333950	1162100	768	784	TRUE
02_1	Uncategorized Sample	BioSample 1	02_1	g.16296 ORF g.16296 m.16296 type:internal len:869 (+) comp255592_c0_seq1:2-2611(+)	m.16296	atrina_contam.fasta	97343.1	1	52	83	230	0.0048	0.65	possibly correct	TRUE	02_1.43118.43118.3	RASLVDLIPDWPTLQHR	R	E	0.997	4.26	0.6	2			673.038	2016.09	2017.1	3	0.0006	0.2975	7172.06	2053910	1911550	768	784	TRUE
02_1	Uncategorized Sample	BioSample 1	02_1	g.16296 ORF g.16296 m.16296 type:internal len:869 (+) comp255592_c0_seq1:2-2611(+)	m.16296	atrina_contam.fasta	97343.1	1	52	83	230	0.0048	0.65	possibly correct	TRUE	02_1.3539.3539.2	RPSQIEMmK	R	A	0.994	2.61	0.288	2		m8: Oxidation (+15.99)	568.284	1134.55	1135.56	2	0.000723	0.6367	1805.42	1286400	1160870	705	713	TRUE
02_1	Uncategorized Sample	BioSample 1	02_1	g.16296 ORF g.16296 m.16296 type:internal len:869 (+) comp255592_c0_seq1:2-2611(+)	m.16296	atrina_contam.fasta	97343.1	1	52	83	230	0.0048	0.65	possibly correct	TRUE	02_1.5896.5896.2	RPSQIEMMK	R	A	0.996	2.44	0.416	2			560.287	1118.56	1119.57	2	0.000827	0.7387	2114.76	876826	742987	705	713	TRUE
02_1	Uncategorized Sample	BioSample 1	02_1	g.16296 ORF g.16296 m.16296 type:internal len:869 (+) comp255592_c0_seq1:2-2611(+)	m.16296	atrina_contam.fasta	97343.1	1	52	83	230	0.0048	0.65	possibly correct	TRUE	02_1.21028.21028.2	TGLIVTcSLEAKPEPK	R	I	0.997	4.04	0.598	2	c7: Carbamidomethyl (+57.02)		871.971	1741.93	1742.94	2	-0.0007753	-0.4448	4120.78	6413020	6822540	41	56	TRUE
02_1	Uncategorized Sample	BioSample 1	02_1	g.16296 ORF g.16296 m.16296 type:internal len:869 (+) comp255592_c0_seq1:2-2611(+)	m.16296	atrina_contam.fasta	97343.1	1	52	83	230	0.0048	0.65	possibly correct	TRUE	02_1.20966.20966.3	TGLIVTcSLEAKPEPK	R	I	0.997	3.89	0.496	2	c7: Carbamidomethyl (+57.02)		581.65	1741.93	1742.94	3	0.0007787	0.4468	4112.79	3674980	2573590	41	56	TRUE
02_1	Uncategorized Sample	BioSample 1	02_1	g.16296 ORF g.16296 m.16296 type:internal len:869 (+) comp255592_c0_seq1:2-2611(+)	m.16296	atrina_contam.fasta	97343.1	1	52	83	230	0.0048	0.65	possibly correct	TRUE	02_1.21334.21334.3	TGLIVTcSLEAKPEPK	R	I	0.997	3.59	0.515	2	c7: Carbamidomethyl (+57.02)		581.65	1741.93	1742.94	3	0.0003357	0.1926	4160.45	1255850	516539	41	56	TRUE
02_1	Uncategorized Sample	BioSample 1	02_1	g.16296 ORF g.16296 m.16296 type:internal len:869 (+) comp255592_c0_seq1:2-2611(+)	m.16296	atrina_contam.fasta	97343.1	1	52	83	230	0.0048	0.65	possibly correct	TRUE	02_1.21139.21139.3	TGLIVTcSLEAKPEPK	R	I	0.997	4.11	0.55	2	c7: Carbamidomethyl (+57.02)		581.65	1741.93	1742.94	3	0.0007687	0.441	4135.41	7340710	5134830	41	56	TRUE
02_1	Uncategorized Sample	BioSample 1	02_1	g.16296 ORF g.16296 m.16296 type:internal len:869 (+) comp255592_c0_seq1:2-2611(+)	m.16296	atrina_contam.fasta	97343.1	1	52	83	230	0.0048	0.65	possibly correct	TRUE	02_1.3161.3161.3	TKIDGPTHTLK	K	G	0.992	2.86	0.301	2			404.231	1209.67	1210.68	3	-0.000238	-0.1966	1755.34	7072250	6466990	563	573	TRUE
02_1	Uncategorized Sample	BioSample 1	02_1	g.16296 ORF g.16296 m.16296 type:internal len:869 (+) comp255592_c0_seq1:2-2611(+)	m.16296	atrina_contam.fasta	97343.1	1	52	83	230	0.0048	0.65	possibly correct	TRUE	02_1.3561.3561.2	TKIDGPTHTLK	K	G	0.994	2.81	0.435	2			605.844	1209.67	1210.68	2	0.002259	1.866	1808.33	341595	729791	563	573	TRUE
02_1	Uncategorized Sample	BioSample 1	02_1	g.16296 ORF g.16296 m.16296 type:internal len:869 (+) comp255592_c0_seq1:2-2611(+)	m.16296	atrina_contam.fasta	97343.1	1	52	83	230	0.0048	0.65	possibly correct	TRUE	02_1.3556.3556.3	TKIDGPTHTLK	K	G	0.997	3.36	0.512	2			404.231	1209.67	1210.68	3	-0.000963	-0.7954	1807.68	1041160	1559480	563	573	TRUE
02_1	Uncategorized Sample	BioSample 1	02_1	g.16296 ORF g.16296 m.16296 type:internal len:869 (+) comp255592_c0_seq1:2-2611(+)	m.16296	atrina_contam.fasta	97343.1	1	52	83	230	0.0048	0.65	possibly correct	TRUE	02_1.3004.3004.3	TKIDGPTHTLK	K	G	0.997	3.55	0.501	2			404.231	1209.67	1210.68	3	-0.000153	-0.1264	1734.35	1348240	1789030	563	573	TRUE
02_1	Uncategorized Sample	BioSample 1	02_1	g.16296 ORF g.16296 m.16296 type:internal len:869 (+) comp255592_c0_seq1:2-2611(+)	m.16296	atrina_contam.fasta	97343.1	1	52	83	230	0.0048	0.65	possibly correct	TRUE	02_1.3664.3664.2	TKPSGTAPTFK	K	E	0.992	2.5	0.443	2			567.811	1133.61	1134.62	2	-0.000461	-0.4063	1822.28	3327200	6629250	127	137	TRUE
02_1	Uncategorized Sample	BioSample 1	02_1	g.16296 ORF g.16296 m.16296 type:internal len:869 (+) comp255592_c0_seq1:2-2611(+)	m.16296	atrina_contam.fasta	97343.1	1	52	83	230	0.0048	0.65	possibly correct	TRUE	02_1.50044.50044.3	TTEKGNDYVFYLDILNFNK	R	N	0.994	2.17	0.556	2			765.382	2293.13	2294.13	3	-0.001799	-0.7842	8318.89	96233.8	30020	182	200	TRUE
02_1	Uncategorized Sample	BioSample 1	02_1	g.16296 ORF g.16296 m.16296 type:internal len:869 (+) comp255592_c0_seq1:2-2611(+)	m.16296	atrina_contam.fasta	97343.1	1	52	83	230	0.0048	0.65	possibly correct	TRUE	02_1.50174.50174.3	TTEKGNDYVFYLDILNFNK	R	N	0.997	4.92	0.493	2			765.383	2293.13	2294.13	3	0.000427	0.1861	8340.06	1165820	1193290	182	200	TRUE
02_1	Uncategorized Sample	BioSample 1	02_1	g.16296 ORF g.16296 m.16296 type:internal len:869 (+) comp255592_c0_seq1:2-2611(+)	m.16296	atrina_contam.fasta	97343.1	1	52	83	230	0.0048	0.65	possibly correct	TRUE	02_1.45179.45179.4	TTEKGNDYVFYLDILNFNKNDSGQYK	R	V	0.99	2.65	0.431	2			772.374	3085.47	3086.47	4	-0.001936	-0.6273	7478.6	428199	88898	182	207	TRUE
02_1	Uncategorized Sample	BioSample 1	02_1	g.16296 ORF g.16296 m.16296 type:internal len:869 (+) comp255592_c0_seq1:2-2611(+)	m.16296	atrina_contam.fasta	97343.1	1	52	83	230	0.0048	0.65	possibly correct	TRUE	02_1.50370.50370.2	VDLNILEDIPPPSIK	K	F	0.984	2.44	0.525	2			831.968	1661.92	1662.93	2	-0.002244	-1.349	8376.03	113197	128307	591	605	TRUE
02_1	Uncategorized Sample	BioSample 1	02_1	g.16296 ORF g.16296 m.16296 type:internal len:869 (+) comp255592_c0_seq1:2-2611(+)	m.16296	atrina_contam.fasta	97343.1	1	52	83	230	0.0048	0.65	possibly correct	TRUE	02_1.49225.49225.2	VDLNILEDIPPPSIK	K	F	0.989	2.28	0.577	2			831.969	1661.92	1662.93	2	-0.00147	-0.884	8166.89	92314.9	96047	591	605	TRUE
02_1	Uncategorized Sample	BioSample 1	02_1	g.16296 ORF g.16296 m.16296 type:internal len:869 (+) comp255592_c0_seq1:2-2611(+)	m.16296	atrina_contam.fasta	97343.1	1	52	83	230	0.0048	0.65	possibly correct	TRUE	02_1.50482.50482.2	VDLNILEDIPPPSIK	K	F	0.996	2.43	0.602	2			831.969	1661.92	1662.93	2	-0.001431	-0.8605	8397.21	96541.8	88241	591	605	TRUE
02_1	Uncategorized Sample	BioSample 1	02_1	g.16296 ORF g.16296 m.16296 type:internal len:869 (+) comp255592_c0_seq1:2-2611(+)	m.16296	atrina_contam.fasta	97343.1	1	52	83	230	0.0048	0.65	possibly correct	TRUE	02_1.49461.49461.3	VDLNILEDIPPPSIK	K	F	0.997	2.73	0.453	2			554.982	1661.92	1662.93	3	-7.3e-05	-0.0439	8213.1	3409450	979544	591	605	TRUE
02_1	Uncategorized Sample	BioSample 1	02_1	g.16296 ORF g.16296 m.16296 type:internal len:869 (+) comp255592_c0_seq1:2-2611(+)	m.16296	atrina_contam.fasta	97343.1	1	52	83	230	0.0048	0.65	possibly correct	TRUE	02_1.50004.50004.2	VDLNILEDIPPPSIK	K	F	0.997	2.81	0.516	2			831.97	1661.92	1662.93	2	0.000124	0.07457	8311.4	278069	263887	591	605	TRUE
02_1	Uncategorized Sample	BioSample 1	02_1	g.16296 ORF g.16296 m.16296 type:internal len:869 (+) comp255592_c0_seq1:2-2611(+)	m.16296	atrina_contam.fasta	97343.1	1	52	83	230	0.0048	0.65	possibly correct	TRUE	02_1.50259.50259.2	VDLNILEDIPPPSIK	K	F	0.997	2.75	0.629	2			831.969	1661.92	1662.93	2	-0.000605	-0.3638	8355.19	150163	125013	591	605	TRUE
02_1	Uncategorized Sample	BioSample 1	02_1	g.16296 ORF g.16296 m.16296 type:internal len:869 (+) comp255592_c0_seq1:2-2611(+)	m.16296	atrina_contam.fasta	97343.1	1	52	83	230	0.0048	0.65	possibly correct	TRUE	02_1.50128.50128.2	VDLNILEDIPPPSIK	K	F	0.997	2.79	0.579	2			831.969	1661.92	1662.93	2	-0.000403	-0.2423	8332.94	249077	191280	591	605	TRUE
02_1	Uncategorized Sample	BioSample 1	02_1	g.16296 ORF g.16296 m.16296 type:internal len:869 (+) comp255592_c0_seq1:2-2611(+)	m.16296	atrina_contam.fasta	97343.1	1	52	83	230	0.0048	0.65	possibly correct	TRUE	02_1.49436.49436.2	VDLNILEDIPPPSIK	K	F	0.997	3.94	0.481	2			831.969	1661.92	1662.93	2	-0.000278	-0.1672	8208.06	11151600	17226200	591	605	TRUE
02_1	Uncategorized Sample	BioSample 1	02_1	g.16296 ORF g.16296 m.16296 type:internal len:869 (+) comp255592_c0_seq1:2-2611(+)	m.16296	atrina_contam.fasta	97343.1	1	52	83	230	0.0048	0.65	possibly correct	TRUE	02_1.49893.49893.2	VDLNILEDIPPPSIK	K	F	0.997	3.29	0.559	2			831.969	1661.92	1662.93	2	-0.001054	-0.6338	8290.32	466063	434917	591	605	TRUE
02_1	Uncategorized Sample	BioSample 1	02_1	g.16296 ORF g.16296 m.16296 type:internal len:869 (+) comp255592_c0_seq1:2-2611(+)	m.16296	atrina_contam.fasta	97343.1	1	52	83	230	0.0048	0.65	possibly correct	TRUE	02_1.49673.49673.2	VDLNILEDIPPPSIK	K	F	0.997	3.73	0.524	2			831.969	1661.92	1662.93	2	-0.000831	-0.4997	8248.75	3875920	5881390	591	605	TRUE
02_1	Uncategorized Sample	BioSample 1	02_1	g.16296 ORF g.16296 m.16296 type:internal len:869 (+) comp255592_c0_seq1:2-2611(+)	m.16296	atrina_contam.fasta	97343.1	1	52	83	230	0.0048	0.65	possibly correct	TRUE	02_1.49791.49791.2	VDLNILEDIPPPSIK	K	F	0.997	3.5	0.548	2			831.969	1661.92	1662.93	2	-0.000804	-0.4835	8269.37	1236200	1094970	591	605	TRUE
02_1	Uncategorized Sample	BioSample 1	02_1	g.16296 ORF g.16296 m.16296 type:internal len:869 (+) comp255592_c0_seq1:2-2611(+)	m.16296	atrina_contam.fasta	97343.1	1	52	83	230	0.0048	0.65	possibly correct	TRUE	02_1.49553.49553.2	VDLNILEDIPPPSIK	K	F	0.997	3.87	0.529	2			831.969	1661.92	1662.93	2	-0.000643	-0.3867	8228.41	10087100	14251700	591	605	TRUE
02_1	Uncategorized Sample	BioSample 1	02_1	g.16296 ORF g.16296 m.16296 type:internal len:869 (+) comp255592_c0_seq1:2-2611(+)	m.16296	atrina_contam.fasta	97343.1	1	52	83	230	0.0048	0.65	possibly correct	TRUE	02_1.49331.49331.2	VDLNILEDIPPPSIK	K	F	0.997	4	0.555	2			831.969	1661.92	1662.93	2	-0.000442	-0.2658	8187.57	3702690	5990720	591	605	TRUE
02_1	Uncategorized Sample	BioSample 1	02_1	g.16296 ORF g.16296 m.16296 type:internal len:869 (+) comp255592_c0_seq1:2-2611(+)	m.16296	atrina_contam.fasta	97343.1	1	52	83	230	0.0048	0.65	possibly correct	TRUE	02_1.32879.32879.2	VTGTEPITVTWYK	K	D	0.997	3.56	0.521	2			747.897	1493.78	1494.78	2	0.001737	1.162	5720.6	319213	447337	361	373	TRUE
02_1	Uncategorized Sample	BioSample 1	02_1	g.16296 ORF g.16296 m.16296 type:internal len:869 (+) comp255592_c0_seq1:2-2611(+)	m.16296	atrina_contam.fasta	97343.1	1	52	83	230	0.0048	0.65	possibly correct	TRUE	02_1.32669.32669.2	VTGTEPITVTWYK	K	D	0.997	3.82	0.502	2			747.896	1493.78	1494.78	2	-0.000145	-0.097	5691.4	3633130	2962290	361	373	TRUE
02_1	Uncategorized Sample	BioSample 1	02_1	g.16296 ORF g.16296 m.16296 type:internal len:869 (+) comp255592_c0_seq1:2-2611(+)	m.16296	atrina_contam.fasta	97343.1	1	52	83	230	0.0048	0.65	possibly correct	TRUE	02_1.32511.32511.2	VTGTEPITVTWYK	K	D	0.997	3.86	0.527	2			747.896	1493.78	1494.78	2	-0.000198	-0.1325	5669.22	13542200	19454600	361	373	TRUE
02_1	Uncategorized Sample	BioSample 1	02_1	g.16296 ORF g.16296 m.16296 type:internal len:869 (+) comp255592_c0_seq1:2-2611(+)	m.16296	atrina_contam.fasta	97343.1	1	52	83	230	0.0048	0.65	possibly correct	TRUE	02_1.48893.48893.3	YHFENEGDIYTLIINNVK	R	L	0.986	3.5	0.341	2			728.36	2182.06	2182.08	3	0.9846	-8.302	8107.35	683964	533119	838	855	TRUE
02_1	Uncategorized Sample	BioSample 1	02_1	g.16296 ORF g.16296 m.16296 type:internal len:869 (+) comp255592_c0_seq1:2-2611(+)	m.16296	atrina_contam.fasta	97343.1	1	52	83	230	0.0048	0.65	possibly correct	TRUE	02_1.48019.48019.3	YHFENEGDIYTLIINNVK	R	L	0.995	2.39	0.55	2			728.032	2181.07	2182.08	3	-0.001498	-0.6865	7961.4	106541	44607	838	855	TRUE
02_1	Uncategorized Sample	BioSample 1	02_1	g.16296 ORF g.16296 m.16296 type:internal len:869 (+) comp255592_c0_seq1:2-2611(+)	m.16296	atrina_contam.fasta	97343.1	1	52	83	230	0.0048	0.65	possibly correct	TRUE	02_1.47911.47911.3	YHFENEGDIYTLIINNVK	R	L	0.997	2.47	0.563	2			728.032	2181.07	2182.08	3	-0.001006	-0.461	7941.13	100458	64561	838	855	TRUE
02_1	Uncategorized Sample	BioSample 1	02_1	g.16296 ORF g.16296 m.16296 type:internal len:869 (+) comp255592_c0_seq1:2-2611(+)	m.16296	atrina_contam.fasta	97343.1	1	52	83	230	0.0048	0.65	possibly correct	TRUE	02_1.47776.47776.3	YHFENEGDIYTLIINNVK	R	L	0.997	2.38	0.555	2			728.032	2181.07	2182.08	3	0.000332	0.1521	7915.05	98591.7	69439	838	855	TRUE
02_1	Uncategorized Sample	BioSample 1	02_1	g.16296 ORF g.16296 m.16296 type:internal len:869 (+) comp255592_c0_seq1:2-2611(+)	m.16296	atrina_contam.fasta	97343.1	1	52	83	230	0.0048	0.65	possibly correct	TRUE	02_1.47667.47667.3	YHFENEGDIYTLIINNVK	R	L	0.997	2.96	0.571	2			728.032	2181.07	2182.08	3	-0.000122	-0.05591	7894.04	161532	116446	838	855	TRUE
02_1	Uncategorized Sample	BioSample 1	02_1	g.16296 ORF g.16296 m.16296 type:internal len:869 (+) comp255592_c0_seq1:2-2611(+)	m.16296	atrina_contam.fasta	97343.1	1	52	83	230	0.0048	0.65	possibly correct	TRUE	02_1.47548.47548.3	YHFENEGDIYTLIINNVK	R	L	0.997	3.25	0.586	2			728.032	2181.07	2182.08	3	-0.000973	-0.4459	7873.81	306144	256197	838	855	TRUE
02_1	Uncategorized Sample	BioSample 1	02_1	g.16296 ORF g.16296 m.16296 type:internal len:869 (+) comp255592_c0_seq1:2-2611(+)	m.16296	atrina_contam.fasta	97343.1	1	52	83	230	0.0048	0.65	possibly correct	TRUE	02_1.42173.42173.2	YHFENEGDIYTLIINNVK	R	L	0.997	4.09	0.485	2			1092.04	2182.06	2182.08	2	0.9863	-7.536	7032.6	221947	391491	838	855	TRUE
02_1	Uncategorized Sample	BioSample 1	02_1	g.16296 ORF g.16296 m.16296 type:internal len:869 (+) comp255592_c0_seq1:2-2611(+)	m.16296	atrina_contam.fasta	97343.1	1	52	83	230	0.0048	0.65	possibly correct	TRUE	02_1.47433.47433.3	YHFENEGDIYTLIINNVK	R	L	0.997	3.94	0.522	2			728.032	2181.07	2182.08	3	6.6e-05	0.03025	7853.39	463603	429604	838	855	TRUE
02_1	Uncategorized Sample	BioSample 1	02_1	g.16296 ORF g.16296 m.16296 type:internal len:869 (+) comp255592_c0_seq1:2-2611(+)	m.16296	atrina_contam.fasta	97343.1	1	52	83	230	0.0048	0.65	possibly correct	TRUE	02_1.47310.47310.3	YHFENEGDIYTLIINNVK	R	L	0.997	4.21	0.548	2			728.032	2181.07	2182.08	3	8.3e-05	0.03804	7833.17	2088420	3002880	838	855	TRUE
02_1	Uncategorized Sample	BioSample 1	02_1	g.16296 ORF g.16296 m.16296 type:internal len:869 (+) comp255592_c0_seq1:2-2611(+)	m.16296	atrina_contam.fasta	97343.1	1	52	83	230	0.0048	0.65	possibly correct	TRUE	02_1.47191.47191.3	YHFENEGDIYTLIINNVK	R	L	0.997	4.37	0.553	2			728.032	2181.07	2182.08	3	0.000492	0.2255	7812.34	11009600	12865400	838	855	TRUE
02_1	Uncategorized Sample	BioSample 1	02_1	g.16296 ORF g.16296 m.16296 type:internal len:869 (+) comp255592_c0_seq1:2-2611(+)	m.16296	atrina_contam.fasta	97343.1	1	52	83	230	0.0048	0.65	possibly correct	TRUE	02_1.47167.47167.2	YHFENEGDIYTLIINNVK	R	L	0.997	6.69	0.651	2			1091.55	2181.08	2182.08	2	0.00124	0.5683	7808.26	889527	1838660	838	855	TRUE
02_1	Uncategorized Sample	BioSample 1	02_1	g.16296 ORF g.16296 m.16296 type:internal len:869 (+) comp255592_c0_seq1:2-2611(+)	m.16296	atrina_contam.fasta	97343.1	1	52	83	230	0.0048	0.65	possibly correct	TRUE	02_1.53146.53146.2	YTVILEQEGVPVDEATWSVFVK	K	D	0.983	2.08	0.623	2			1255.15	2508.28	2509.29	2	-0.003461	-1.379	8931.85	85617.5	82820	643	664	TRUE
02_1	Uncategorized Sample	BioSample 1	02_1	g.16296 ORF g.16296 m.16296 type:internal len:869 (+) comp255592_c0_seq1:2-2611(+)	m.16296	atrina_contam.fasta	97343.1	1	52	83	230	0.0048	0.65	possibly correct	TRUE	02_1.53323.53323.2	YTVILEQEGVPVDEATWSVFVK	K	D	0.997	2.87	0.679	2			1255.65	2509.28	2509.29	2	1.001	-0.6576	8973.85	87895.7	63234	643	664	TRUE
02_1	Uncategorized Sample	BioSample 1	02_1	g.16296 ORF g.16296 m.16296 type:internal len:869 (+) comp255592_c0_seq1:2-2611(+)	m.16296	atrina_contam.fasta	97343.1	1	52	83	230	0.0048	0.65	possibly correct	TRUE	02_1.53233.53233.2	YTVILEQEGVPVDEATWSVFVK	K	D	0.997	4.5	0.747	2			1255.15	2508.28	2509.29	2	-0.000299	-0.1192	8953.01	153769	204298	643	664	TRUE
02_1	Uncategorized Sample	BioSample 1	02_1	g.16296 ORF g.16296 m.16296 type:internal len:869 (+) comp255592_c0_seq1:2-2611(+)	m.16296	atrina_contam.fasta	97343.1	1	52	83	230	0.0048	0.65	possibly correct	TRUE	02_1.48653.48653.3	YTVILEQEGVPVDEATWSVFVKDPK	K	D	0.997	4.03	0.593	2			950.492	2848.45	2849.46	3	0.000649	0.2278	8062.77	416572	498371	643	667	TRUE
02_1	Uncategorized Sample	BioSample 1	02_1	g.16296 ORF g.16296 m.16296 type:internal len:869 (+) comp255592_c0_seq1:2-2611(+)	m.16296	atrina_contam.fasta	97343.1	1	52	83	230	0.0048	0.65	possibly correct	TRUE	02_1.48406.48406.3	YTVILEQEGVPVDEATWSVFVKDPK	K	D	0.997	6.47	0.523	2			950.492	2848.45	2849.46	3	0.001171	0.411	8021.7	10380300	10635600	643	667	TRUE
02_1	Uncategorized Sample	BioSample 1	02_1	g.16296 ORF g.16296 m.16296 type:internal len:869 (+) comp255592_c0_seq1:2-2611(+)	m.16296	atrina_contam.fasta	97343.1	1	52	83	230	0.0048	0.65	possibly correct	TRUE	02_1.48537.48537.3	YTVILEQEGVPVDEATWSVFVKDPK	K	D	0.997	6.12	0.565	2			950.492	2848.45	2849.46	3	0.000398	0.1397	8042.04	1128010	1538780	643	667	TRUE
02_1	Uncategorized Sample	BioSample 1	02_1	g.16296 ORF g.16296 m.16296 type:internal len:869 (+) comp255592_c0_seq1:2-2611(+)	m.16296	atrina_contam.fasta	97343.1	1	52	83	230	0.0048	0.65	possibly correct	TRUE	02_1.10859.10859.2	YVATMTIKDPK	R	A	0.985	2.53	0.379	2			633.843	1265.67	1266.68	2	0.001697	1.34	2774.65	467529	792063	85	95	TRUE
02_1	Uncategorized Sample	BioSample 1	02_1	g.16296 ORF g.16296 m.16296 type:internal len:869 (+) comp255592_c0_seq1:2-2611(+)	m.16296	atrina_contam.fasta	97343.1	1	52	83	230	0.0048	0.65	possibly correct	TRUE	02_1.5055.5055.2	YVATmTIKDPK	R	A	0.987	2.51	0.41	2		m5: Oxidation (+15.99)	641.84	1281.67	1282.67	2	0.001482	1.155	2004.33	1046740	1262140	85	95	TRUE
02_1	Uncategorized Sample	BioSample 1	02_1	g.16296 ORF g.16296 m.16296 type:internal len:869 (+) comp255592_c0_seq1:2-2611(+)	m.16296	atrina_contam.fasta	97343.1	1	52	83	230	0.0048	0.65	possibly correct	TRUE	02_1.6601.6601.2	YVATmTIKDPK	R	A	0.993	2.31	0.43	2		m5: Oxidation (+15.99)	641.839	1281.66	1282.67	2	0.000254	0.198	2210.7	884494	934669	85	95	TRUE
02_1	Uncategorized Sample	BioSample 1	02_1	g.16296 ORF g.16296 m.16296 type:internal len:869 (+) comp255592_c0_seq1:2-2611(+)	m.16296	atrina_contam.fasta	97343.1	1	52	83	230	0.0048	0.65	possibly correct	TRUE	02_1.5215.5215.2	YVATmTIKDPK	R	A	0.997	2.68	0.483	2		m5: Oxidation (+15.99)	641.839	1281.66	1282.67	2	-0.000446	-0.3477	2025.28	748924	1030020	85	95	TRUE
02_1	Uncategorized Sample	BioSample 1	02_1	g.16296 ORF g.16296 m.16296 type:internal len:869 (+) comp255592_c0_seq1:2-2611(+)	m.16296	atrina_contam.fasta	97343.1	1	52	83	230	0.0048	0.65	possibly correct	TRUE	02_1.11016.11016.2	YVATMTIKDPK	R	A	0.997	3.36	0.447	2			633.842	1265.67	1266.68	2	-0.000146	-0.1153	2795.19	8241560	9222160	85	95	TRUE
02_1	Uncategorized Sample	BioSample 1	02_1	g.15696 ORF g.15696 m.15696 type:5prime_partial len:376 (+) comp255057_c0_seq2:2-1129(+)	m.15696	atrina_contam.fasta	41493.1	0.989	1	1	1	2.09e-05	0.0693	possibly correct	TRUE	02_1.49659.49659.3	GNVAVIEPAESHYYQPLWTLVGGGIK	K	T	0.994	2.49	0.514	2			933.488	2797.44	2798.45	3	-0.00087	-0.3109	8246.63	100152	77179	72	97	TRUE
02_1	Uncategorized Sample	BioSample 1	02_1	g.15686 ORF g.15686 m.15686 type:3prime_partial len:193 (+) comp255049_c4_seq1:81-662(+)	m.15686	atrina_contam.fasta	21478.4	1	2	2	2	4.18e-05	0.135	possibly correct	TRUE	02_1.24364.24364.2	FWYGGcDGNLNR	R	F	0.986	2.07	0.51	2	c6: Carbamidomethyl (+57.02)		729.814	1457.61	1458.62	2	-0.0008873	-0.6083	4562.93	518498	449976	56	67	TRUE
02_1	Uncategorized Sample	BioSample 1	02_1	g.15686 ORF g.15686 m.15686 type:3prime_partial len:193 (+) comp255049_c4_seq1:81-662(+)	m.15686	atrina_contam.fasta	21478.4	1	2	2	2	4.18e-05	0.135	possibly correct	TRUE	02_1.26982.26982.3	VLWYYNTDKEIcDR	K	F	0.996	2.85	0.389	2	c12: Carbamidomethyl (+57.02)		625.63	1873.87	1874.87	3	0.0004707	0.2511	4916.96	1984860	540243	138	151	TRUE
02_1	Uncategorized Sample	BioSample 1	02_1	g.15682 ORF g.15682 m.15682 type:5prime_partial len:1279 (+) comp255049_c3_seq1:3-3839(+)	m.15682,m.15683	atrina_contam.fasta	142320	1	10	10	11	0.00023	0.0915	possibly correct	TRUE	02_1.14262.14262.3	cSRPIKPEDAcTLPSVTGR	K	C	0.997	3.91	0.459	2	c1: Carbamidomethyl (+57.02), c11: Carbamidomethyl (+57.02)		715.694	2144.06	2144.06	3	1.01	3.376	3227.03	675297	804589	19	37	TRUE
02_1	Uncategorized Sample	BioSample 1	02_1	g.15682 ORF g.15682 m.15682 type:5prime_partial len:1279 (+) comp255049_c3_seq1:3-3839(+)	m.15682,m.15683	atrina_contam.fasta	142320	1	10	10	11	0.00023	0.0915	possibly correct	TRUE	02_1.16989.16989.2	DGFLVTQGSK	R	Y	0.98	2.46	0.445	2			526.276	1050.54	1051.54	2	0.001733	1.648	3588.58	494784	377714	994	1003	TRUE
02_1	Uncategorized Sample	BioSample 1	02_1	g.15682 ORF g.15682 m.15682 type:5prime_partial len:1279 (+) comp255049_c3_seq1:3-3839(+)	m.15682,m.15683	atrina_contam.fasta	142320	1	10	10	11	0.00023	0.0915	possibly correct	TRUE	02_1.50445.50445.3	DYVcKPFVYPPFQcLAYLR	R	R	0.99	2.91	0.339	2	c4: Carbamidomethyl (+57.02), c14: Carbamidomethyl (+57.02)		812.734	2435.18	2436.19	3	0.0004024	0.1652	8390.03	149165	200014	542	560	TRUE
02_1	Uncategorized Sample	BioSample 1	02_1	g.15682 ORF g.15682 m.15682 type:5prime_partial len:1279 (+) comp255049_c3_seq1:3-3839(+)	m.15682,m.15683	atrina_contam.fasta	142320	1	10	10	11	0.00023	0.0915	possibly correct	TRUE	02_1.10904.10904.2	FATEDDcLAK	R	C	0.993	2.05	0.411	2	c7: Carbamidomethyl (+57.02)		585.261	1168.51	1169.51	2	-0.0007083	-0.6056	2780.55	628799	825950	9	18	TRUE
02_1	Uncategorized Sample	BioSample 1	02_1	g.15682 ORF g.15682 m.15682 type:5prime_partial len:1279 (+) comp255049_c3_seq1:3-3839(+)	m.15682,m.15683	atrina_contam.fasta	142320	1	10	10	11	0.00023	0.0915	possibly correct	TRUE	02_1.10745.10745.2	FATEDDcLAK	R	C	0.997	2.54	0.464	2	c7: Carbamidomethyl (+57.02)		585.261	1168.51	1169.51	2	0.0005907	0.5051	2759.91	2115350	2281340	9	18	TRUE
02_1	Uncategorized Sample	BioSample 1	02_1	g.15682 ORF g.15682 m.15682 type:5prime_partial len:1279 (+) comp255049_c3_seq1:3-3839(+)	m.15682,m.15683	atrina_contam.fasta	142320	1	10	10	11	0.00023	0.0915	possibly correct	TRUE	02_1.11211.11211.2	ISSNNASPYIER	R	Y	0.997	3.68	0.535	2			675.834	1349.65	1350.66	2	-0.003597	-2.663	2822.54	893107	701500	1029	1040	TRUE
02_1	Uncategorized Sample	BioSample 1	02_1	g.15682 ORF g.15682 m.15682 type:5prime_partial len:1279 (+) comp255049_c3_seq1:3-3839(+)	m.15682,m.15683	atrina_contam.fasta	142320	1	10	10	11	0.00023	0.0915	possibly correct	TRUE	02_1.33856.33856.2	LQIEEPVGIYPTPSK	R	I	0.997	3.49	0.526	2			835.953	1669.89	1670.9	2	-0.000785	-0.4698	5856.47	511206	906259	1043	1057	TRUE
02_1	Uncategorized Sample	BioSample 1	02_1	g.15682 ORF g.15682 m.15682 type:5prime_partial len:1279 (+) comp255049_c3_seq1:3-3839(+)	m.15682,m.15683	atrina_contam.fasta	142320	1	10	10	11	0.00023	0.0915	possibly correct	TRUE	02_1.18344.18344.3	PIKPEDAcTLPSVTGR	R	C	0.997	3.48	0.452	2	c8: Carbamidomethyl (+57.02)		580.97	1739.89	1740.9	3	0.0006027	0.3462	3767.12	950886	646608	22	37	TRUE
02_1	Uncategorized Sample	BioSample 1	02_1	g.15682 ORF g.15682 m.15682 type:5prime_partial len:1279 (+) comp255049_c3_seq1:3-3839(+)	m.15682,m.15683	atrina_contam.fasta	142320	1	10	10	11	0.00023	0.0915	possibly correct	TRUE	02_1.5577.5577.2	QcDTGVDGSIQR	K	W	0.997	2.89	0.474	2	c2: Carbamidomethyl (+57.02)		668.302	1334.59	1335.6	2	-8.73e-05	-0.06537	2072.68	585210	620002	493	504	TRUE
02_1	Uncategorized Sample	BioSample 1	02_1	g.15682 ORF g.15682 m.15682 type:5prime_partial len:1279 (+) comp255049_c3_seq1:3-3839(+)	m.15682,m.15683	atrina_contam.fasta	142320	1	10	10	11	0.00023	0.0915	possibly correct	TRUE	02_1.26638.26638.2	QEPLQEVVLSGK	K	S	0.997	3.2	0.552	2			663.866	1325.72	1326.73	2	-0.001216	-0.9165	4869.44	270399	384527	132	143	TRUE
02_1	Uncategorized Sample	BioSample 1	02_1	g.15682 ORF g.15682 m.15682 type:5prime_partial len:1279 (+) comp255049_c3_seq1:3-3839(+)	m.15682,m.15683	atrina_contam.fasta	142320	1	10	10	11	0.00023	0.0915	possibly correct	TRUE	02_1.22927.22927.2	YYYDMSIK	R	D	0.99	1.71	0.654	2			541.747	1081.48	1082.49	2	0.000178	0.1644	4370.97	484555	278660	789	796	TRUE
02_1	Uncategorized Sample	BioSample 1	02_1	g.4689 ORF g.4689 m.4689 type:complete len:226 (+) comp239629_c0_seq1:495-1172(+)	m.4689	atrina_contam.fasta	25921.4	1	5	5	6	0.000125	0.28	possibly correct	TRUE	02_1.15799.15799.2	APHPVYPFPK	R	Q	0.995	2.18	0.481	2			576.814	1151.61	1152.62	2	0.000686	0.5952	3431.45	417292	470123	121	130	TRUE
02_1	Uncategorized Sample	BioSample 1	02_1	g.4689 ORF g.4689 m.4689 type:complete len:226 (+) comp239629_c0_seq1:495-1172(+)	m.4689	atrina_contam.fasta	25921.4	1	5	5	6	0.000125	0.28	possibly correct	TRUE	02_1.49030.49030.3	DNVIHLLLHMPEPEWYK	K	F	0.995	2.54	0.468	2			712.031	2133.07	2134.08	3	-5e-06	-0.002343	8132.52	97778.6	53107	77	93	TRUE
02_1	Uncategorized Sample	BioSample 1	02_1	g.4689 ORF g.4689 m.4689 type:complete len:226 (+) comp239629_c0_seq1:495-1172(+)	m.4689	atrina_contam.fasta	25921.4	1	5	5	6	0.000125	0.28	possibly correct	TRUE	02_1.41578.41578.2	FQIYALPLSEPSK	K	S	0.997	2.56	0.569	2			746.907	1491.8	1492.8	2	0.001022	0.6846	6944.5	143477	211826	94	106	TRUE
02_1	Uncategorized Sample	BioSample 1	02_1	g.4689 ORF g.4689 m.4689 type:complete len:226 (+) comp239629_c0_seq1:495-1172(+)	m.4689	atrina_contam.fasta	25921.4	1	5	5	6	0.000125	0.28	possibly correct	TRUE	02_1.41429.41429.2	FQIYALPLSEPSK	K	S	0.997	2.89	0.552	2			746.906	1491.8	1492.8	2	0.000707	0.4736	6923.32	359017	462347	94	106	TRUE
02_1	Uncategorized Sample	BioSample 1	02_1	g.4689 ORF g.4689 m.4689 type:complete len:226 (+) comp239629_c0_seq1:495-1172(+)	m.4689	atrina_contam.fasta	25921.4	1	5	5	6	0.000125	0.28	possibly correct	TRUE	02_1.20169.20169.3	TEKDcSEFVFVQTK	R	D	0.997	3.09	0.453	2	c5: Carbamidomethyl (+57.02)		573.275	1716.8	1717.81	3	0.001476	0.8591	4008.44	1303150	720833	63	76	TRUE
02_1	Uncategorized Sample	BioSample 1	02_1	g.4689 ORF g.4689 m.4689 type:complete len:226 (+) comp239629_c0_seq1:495-1172(+)	m.4689	atrina_contam.fasta	25921.4	1	5	5	6	0.000125	0.28	possibly correct	TRUE	02_1.3981.3981.2	VTHQLINcR	K	T	0.997	2.11	0.469	2	c8: Carbamidomethyl (+57.02)		570.801	1139.59	1140.59	2	1.27e-05	0.01113	1863.62	1113690	878772	54	62	TRUE
02_1	Uncategorized Sample	BioSample 1	02_1	g.15635 ORF g.15635 m.15635 type:internal len:732 (+) comp255025_c1_seq1:2-2200(+)	m.15635	atrina_contam.fasta	85358.9	1	3	3	3	6.27e-05	0.0546	possibly correct	TRUE	02_1.31041.31041.2	DLTTVHLLLNK	R	Q	0.997	3.19	0.62	2			633.875	1265.74	1266.74	2	0.000478	0.3773	5469.01	380916	266586	518	528	TRUE
02_1	Uncategorized Sample	BioSample 1	02_1	g.15635 ORF g.15635 m.15635 type:internal len:732 (+) comp255025_c1_seq1:2-2200(+)	m.15635	atrina_contam.fasta	85358.9	1	3	3	3	6.27e-05	0.0546	possibly correct	TRUE	02_1.26527.26527.3	HSLLEADIHVLGER	K	V	0.997	2.74	0.567	2			530.286	1587.84	1588.84	3	-0.001199	-0.7546	4854.32	472586	118695	415	428	TRUE
02_1	Uncategorized Sample	BioSample 1	02_1	g.15635 ORF g.15635 m.15635 type:internal len:732 (+) comp255025_c1_seq1:2-2200(+)	m.15635	atrina_contam.fasta	85358.9	1	3	3	3	6.27e-05	0.0546	possibly correct	TRUE	02_1.38113.38113.2	LLDPEDVNVEFPDEK	R	S	0.997	3.14	0.613	2			879.925	1757.84	1758.84	2	-0.000824	-0.4685	6449.31	210475	254922	95	109	TRUE
02_1	Uncategorized Sample	BioSample 1	02_1	g.15615 ORF g.15615 m.15615 type:internal len:392 (+) comp255013_c0_seq2:2-1180(+)	m.15615	atrina_contam.fasta	42977.9	1	3	4	4	8.35e-05	0.133	possibly correct	TRUE	02_1.22286.22286.2	ELKEFYQQWNK	K	Q	0.995	2.78	0.456	2			757.375	1512.74	1512.75	2	0.9955	-4.79	4286.35	317921	591636	121	131	TRUE
02_1	Uncategorized Sample	BioSample 1	02_1	g.15615 ORF g.15615 m.15615 type:internal len:392 (+) comp255013_c0_seq2:2-1180(+)	m.15615	atrina_contam.fasta	42977.9	1	3	4	4	8.35e-05	0.133	possibly correct	TRUE	02_1.52674.52674.3	IDAVLLTHLGSDNLFGVSSMLQR	R	K	0.997	2.9	0.563	2			829.44	2485.3	2486.31	3	-0.000927	-0.3728	8830.03	335560	128085	6	28	TRUE
02_1	Uncategorized Sample	BioSample 1	02_1	g.15615 ORF g.15615 m.15615 type:internal len:392 (+) comp255013_c0_seq2:2-1180(+)	m.15615	atrina_contam.fasta	42977.9	1	3	4	4	8.35e-05	0.133	possibly correct	TRUE	02_1.26908.26908.3	VGHGSLDmYVLNPVSDSK	K	E	0.988	2.37	0.513	2		m8: Oxidation (+15.99)	645.317	1932.93	1933.93	3	0.003292	1.702	4906.66	101350	58720	103	120	TRUE
02_1	Uncategorized Sample	BioSample 1	02_1	g.15615 ORF g.15615 m.15615 type:internal len:392 (+) comp255013_c0_seq2:2-1180(+)	m.15615	atrina_contam.fasta	42977.9	1	3	4	4	8.35e-05	0.133	possibly correct	TRUE	02_1.30358.30358.3	VGHGSLDMYVLNPVSDSK	K	E	0.997	3.34	0.511	2			639.984	1916.93	1917.94	3	0.000493	0.257	5375.85	1572370	1562110	103	120	TRUE
02_1	Uncategorized Sample	BioSample 1	02_1	g.4632 ORF g.4632 m.4632 type:complete len:250 (+) comp239493_c0_seq1:58-807(+)	m.4632	atrina_contam.fasta	27341.4	1	3	3	3	6.27e-05	0.157	possibly correct	TRUE	02_1.31033.31033.2	GAFTGDISPAMIK	K	D	0.995	2.76	0.458	2			654.337	1306.66	1307.67	2	-0.000457	-0.3495	5467.96	285234	267271	73	85	TRUE
02_1	Uncategorized Sample	BioSample 1	02_1	g.4632 ORF g.4632 m.4632 type:complete len:250 (+) comp239493_c0_seq1:58-807(+)	m.4632	atrina_contam.fasta	27341.4	1	3	3	3	6.27e-05	0.157	possibly correct	TRUE	02_1.10691.10691.2	IIYGGSVNAGNcK	R	E	0.997	2.62	0.531	2	c12: Carbamidomethyl (+57.02)		676.835	1351.66	1352.66	2	0.0003127	0.2312	2752.84	329553	464890	207	219	TRUE
02_1	Uncategorized Sample	BioSample 1	02_1	g.4632 ORF g.4632 m.4632 type:complete len:250 (+) comp239493_c0_seq1:58-807(+)	m.4632	atrina_contam.fasta	27341.4	1	3	3	3	6.27e-05	0.157	possibly correct	TRUE	02_1.29415.29415.2	NVFGESDELIAEK	R	V	0.988	2.41	0.442	2			725.857	1449.7	1450.71	2	0.001451	1	5247.97	381776	404085	101	113	TRUE
02_1	Uncategorized Sample	BioSample 1	02_1	g.524 ORF g.524 m.524 type:5prime_partial len:206 (+) comp162909_c0_seq1:1-618(+)	m.524	atrina_contam.fasta	22377.7	1	6	6	6	0.000125	0.4	possibly correct	TRUE	02_1.15999.15999.2	AIGLNDAWHK	R	S	0.994	2.36	0.445	2			562.796	1123.58	1124.58	2	0.000678	0.6029	3457.96	863959	928666	150	159	TRUE
02_1	Uncategorized Sample	BioSample 1	02_1	g.524 ORF g.524 m.524 type:5prime_partial len:206 (+) comp162909_c0_seq1:1-618(+)	m.524	atrina_contam.fasta	22377.7	1	6	6	6	0.000125	0.4	possibly correct	TRUE	02_1.6219.6219.2	cSQAVYAAEER	K	I	0.997	2.91	0.345	2	c1: Carbamidomethyl (+57.02)		642.287	1282.56	1283.57	2	-0.001524	-1.188	2157.89	163690	405470	36	46	TRUE
02_1	Uncategorized Sample	BioSample 1	02_1	g.524 ORF g.524 m.524 type:5prime_partial len:206 (+) comp162909_c0_seq1:1-618(+)	m.524	atrina_contam.fasta	22377.7	1	6	6	6	0.000125	0.4	possibly correct	TRUE	02_1.7695.7695.3	ESEMSNKPQEAVIGQK	K	S	0.997	3.22	0.437	2			592.294	1773.86	1774.86	3	0.002453	1.382	2355.43	943007	1654410	115	130	TRUE
02_1	Uncategorized Sample	BioSample 1	02_1	g.524 ORF g.524 m.524 type:5prime_partial len:206 (+) comp162909_c0_seq1:1-618(+)	m.524	atrina_contam.fasta	22377.7	1	6	6	6	0.000125	0.4	possibly correct	TRUE	02_1.36240.36240.2	GYGFGGGAGALSMETGAQFGNK	K	E	0.997	4.39	0.587	2			1038.98	2075.94	2076.94	2	0.007016	3.378	6188.3	190274	293869	93	114	TRUE
02_1	Uncategorized Sample	BioSample 1	02_1	g.524 ORF g.524 m.524 type:5prime_partial len:206 (+) comp162909_c0_seq1:1-618(+)	m.524	atrina_contam.fasta	22377.7	1	6	6	6	0.000125	0.4	possibly correct	TRUE	02_1.8441.8441.3	HYGPHGYGVGTLAK	K	-	0.997	4.67	0.629	2			486.249	1455.73	1456.73	3	0.00033	0.2265	2455.32	1752360	1174100	192	205	TRUE
02_1	Uncategorized Sample	BioSample 1	02_1	g.524 ORF g.524 m.524 type:5prime_partial len:206 (+) comp162909_c0_seq1:1-618(+)	m.524	atrina_contam.fasta	22377.7	1	6	6	6	0.000125	0.4	possibly correct	TRUE	02_1.8427.8427.2	SLDASTLNR	K	H	0.982	2.19	0.344	2			488.757	975.499	976.506	2	0.000202	0.2069	2453.44	3886480	1293630	170	178	TRUE
02_1	Uncategorized Sample	BioSample 1	02_1	decoy_m.17746	decoy_m.17746		0	0.993	1	1	1	2.09e-05	0	possibly correct	TRUE	02_1.6306.6306.3	NILIRWVSIILIINVAFNIKQLR	R	V	0.985	0.59	0.846	2			917.581	2749.72	2749.7	3	1.03	10.02	2169.57	95627.2	63623	0	0	TRUE
02_1	Uncategorized Sample	BioSample 1	02_1	g.10048 ORF g.10048 m.10048 type:internal len:190 (+) comp250412_c1_seq1:2-574(+)	m.10048	atrina_contam.fasta	20625.7	1	2	2	2	4.18e-05	0.174	possibly correct	TRUE	02_1.44938.44938.2	NcETIIVNPDAEVFLVSK	K	V	0.986	2.56	0.519	2	c2: Carbamidomethyl (+57.02)		1024.52	2047.03	2048.04	2	-0.001766	-0.8624	7441.37	101585	63635	163	180	TRUE
02_1	Uncategorized Sample	BioSample 1	02_1	g.10048 ORF g.10048 m.10048 type:internal len:190 (+) comp250412_c1_seq1:2-574(+)	m.10048	atrina_contam.fasta	20625.7	1	2	2	2	4.18e-05	0.174	possibly correct	TRUE	02_1.2995.2995.3	THENVLYTHNDSGGK	R	S	0.997	3.01	0.476	2			557.929	1670.77	1671.77	3	0.001244	0.7441	1733.18	596198	547823	63	77	TRUE
02_1	Uncategorized Sample	BioSample 1	02_1	g.14016 ORF g.14016 m.14016 type:5prime_partial len:164 (+) comp255248_c1_seq1:3-494(+)	m.14016	atrina_contam.fasta	17945.1	1	2	2	2	4.18e-05	0.104	possibly correct	TRUE	02_1.18041.18041.2	VYGIVAGVK	K	V	0.975	1.29	0.464	2			453.277	904.539	905.546	2	0.000394	0.4351	3727.19	320191	281474	89	97	TRUE
02_1	Uncategorized Sample	BioSample 1	02_1	g.14016 ORF g.14016 m.14016 type:5prime_partial len:164 (+) comp255248_c1_seq1:3-494(+)	m.14016	atrina_contam.fasta	17945.1	1	2	2	2	4.18e-05	0.104	possibly correct	TRUE	02_1.8284.8284.2	YNSTIDVR	K	T	0.99	1.82	0.482	2			484.246	966.477	967.484	2	0.000337	0.3483	2433.56	303895	291426	124	131	TRUE
02_1	Uncategorized Sample	BioSample 1	02_1	g.16181 ORF g.16181 m.16181 type:5prime_partial len:245 (+) comp255541_c4_seq2:2-736(+)	m.16181	atrina_contam.fasta	27888.9	1	8	12	18	0.000376	0.332	possibly correct	TRUE	02_1.24821.24821.2	DTGYASSLLDGK	R	L	0.996	2.52	0.544	2			613.8	1225.59	1226.59	2	0.0024	1.957	4624.12	297591	421963	206	217	TRUE
02_1	Uncategorized Sample	BioSample 1	02_1	g.16181 ORF g.16181 m.16181 type:5prime_partial len:245 (+) comp255541_c4_seq2:2-736(+)	m.16181	atrina_contam.fasta	27888.9	1	8	12	18	0.000376	0.332	possibly correct	TRUE	02_1.24664.24664.2	DTGYASSLLDGK	R	L	0.997	2.78	0.636	2			613.797	1225.58	1226.59	2	-0.00322	-2.625	4603.13	542840	1059900	206	217	TRUE
02_1	Uncategorized Sample	BioSample 1	02_1	g.16181 ORF g.16181 m.16181 type:5prime_partial len:245 (+) comp255541_c4_seq2:2-736(+)	m.16181	atrina_contam.fasta	27888.9	1	8	12	18	0.000376	0.332	possibly correct	TRUE	02_1.40047.40047.3	FAcSEQLIILcIENSHR	K	K	0.997	2.51	0.534	2	c3: Carbamidomethyl (+57.02), c11: Carbamidomethyl (+57.02)		697.678	2090.01	2090.02	3	1.003	0.1156	6725.17	148636	83693	224	240	TRUE
02_1	Uncategorized Sample	BioSample 1	02_1	g.16181 ORF g.16181 m.16181 type:5prime_partial len:245 (+) comp255541_c4_seq2:2-736(+)	m.16181	atrina_contam.fasta	27888.9	1	8	12	18	0.000376	0.332	possibly correct	TRUE	02_1.40089.40089.2	FAcSEQLIILcIENSHR	K	K	0.997	3.57	0.55	2	c3: Carbamidomethyl (+57.02), c11: Carbamidomethyl (+57.02)		1045.52	2089.02	2090.02	2	0.006914	3.308	6731.27	113468	117790	224	240	TRUE
02_1	Uncategorized Sample	BioSample 1	02_1	g.16181 ORF g.16181 m.16181 type:5prime_partial len:245 (+) comp255541_c4_seq2:2-736(+)	m.16181	atrina_contam.fasta	27888.9	1	8	12	18	0.000376	0.332	possibly correct	TRUE	02_1.40199.40199.3	FAcSEQLIILcIENSHR	K	K	0.997	4.22	0.613	2	c3: Carbamidomethyl (+57.02), c11: Carbamidomethyl (+57.02)		697.343	2089.01	2090.02	3	-8.66e-05	-0.04144	6746.75	781728	484452	224	240	TRUE
02_1	Uncategorized Sample	BioSample 1	02_1	g.16181 ORF g.16181 m.16181 type:5prime_partial len:245 (+) comp255541_c4_seq2:2-736(+)	m.16181	atrina_contam.fasta	27888.9	1	8	12	18	0.000376	0.332	possibly correct	TRUE	02_1.22149.22149.3	FRDTGYASSLLDGK	R	L	0.992	2.14	0.522	2			510.591	1528.75	1529.76	3	-0.001164	-0.7609	4268.27	366250	171581	204	217	TRUE
02_1	Uncategorized Sample	BioSample 1	02_1	g.16181 ORF g.16181 m.16181 type:5prime_partial len:245 (+) comp255541_c4_seq2:2-736(+)	m.16181	atrina_contam.fasta	27888.9	1	8	12	18	0.000376	0.332	possibly correct	TRUE	02_1.22306.22306.3	FRDTGYASSLLDGK	R	L	0.997	2.74	0.592	2			510.592	1528.75	1529.76	3	0.001436	0.9387	4289.08	882077	359327	204	217	TRUE
02_1	Uncategorized Sample	BioSample 1	02_1	g.16181 ORF g.16181 m.16181 type:5prime_partial len:245 (+) comp255541_c4_seq2:2-736(+)	m.16181	atrina_contam.fasta	27888.9	1	8	12	18	0.000376	0.332	possibly correct	TRUE	02_1.34215.34215.3	KFAcSEQLIILcIENSHR	K	K	0.997	4.31	0.578	2	c4: Carbamidomethyl (+57.02), c12: Carbamidomethyl (+57.02)		740.042	2217.1	2218.11	3	0.0005704	0.2572	5905.99	226516	237001	223	240	TRUE
02_1	Uncategorized Sample	BioSample 1	02_1	g.16181 ORF g.16181 m.16181 type:5prime_partial len:245 (+) comp255541_c4_seq2:2-736(+)	m.16181	atrina_contam.fasta	27888.9	1	8	12	18	0.000376	0.332	possibly correct	TRUE	02_1.39320.39320.3	LYMYALNKPLTGLMR	R	G	0.997	3.13	0.544	2			595.325	1782.95	1783.96	3	0.000115	0.06446	6620.74	841248	381735	71	85	TRUE
02_1	Uncategorized Sample	BioSample 1	02_1	g.16181 ORF g.16181 m.16181 type:5prime_partial len:245 (+) comp255541_c4_seq2:2-736(+)	m.16181	atrina_contam.fasta	27888.9	1	8	12	18	0.000376	0.332	possibly correct	TRUE	02_1.39307.39307.2	LYMYALNKPLTGLMR	R	G	0.997	2.96	0.624	2			892.483	1782.95	1783.96	2	-0.0005	-0.2803	6618.91	103124	195963	71	85	TRUE
02_1	Uncategorized Sample	BioSample 1	02_1	g.16181 ORF g.16181 m.16181 type:5prime_partial len:245 (+) comp255541_c4_seq2:2-736(+)	m.16181	atrina_contam.fasta	27888.9	1	8	12	18	0.000376	0.332	possibly correct	TRUE	02_1.33967.33967.3	MTFTIKEEELYIR	R	V	0.997	2.91	0.455	2			558.293	1671.86	1672.86	3	0.002826	1.689	5871.75	510750	116259	13	25	TRUE
02_1	Uncategorized Sample	BioSample 1	02_1	g.16181 ORF g.16181 m.16181 type:5prime_partial len:245 (+) comp255541_c4_seq2:2-736(+)	m.16181	atrina_contam.fasta	27888.9	1	8	12	18	0.000376	0.332	possibly correct	TRUE	02_1.31297.31297.3	mTFTIKEEELYIR	R	V	0.997	2.56	0.562	2		m1: Oxidation (+15.99)	563.624	1687.85	1688.86	3	0.000886	0.5246	5504.96	276799	44810	13	25	TRUE
02_1	Uncategorized Sample	BioSample 1	02_1	g.16181 ORF g.16181 m.16181 type:5prime_partial len:245 (+) comp255541_c4_seq2:2-736(+)	m.16181	atrina_contam.fasta	27888.9	1	8	12	18	0.000376	0.332	possibly correct	TRUE	02_1.29286.29286.3	mTFTIKEEELYIR	R	V	0.997	2.63	0.571	2		m1: Oxidation (+15.99)	563.624	1687.85	1688.86	3	0.001076	0.6371	5230.76	443700	100032	13	25	TRUE
02_1	Uncategorized Sample	BioSample 1	02_1	g.16181 ORF g.16181 m.16181 type:5prime_partial len:245 (+) comp255541_c4_seq2:2-736(+)	m.16181	atrina_contam.fasta	27888.9	1	8	12	18	0.000376	0.332	possibly correct	TRUE	02_1.34126.34126.3	MTFTIKEEELYIR	R	V	0.997	3.38	0.517	2			558.292	1671.86	1672.86	3	0.000718	0.4292	5893.77	1304840	317858	13	25	TRUE
02_1	Uncategorized Sample	BioSample 1	02_1	g.16181 ORF g.16181 m.16181 type:5prime_partial len:245 (+) comp255541_c4_seq2:2-736(+)	m.16181	atrina_contam.fasta	27888.9	1	8	12	18	0.000376	0.332	possibly correct	TRUE	02_1.41246.41246.2	NEVIFSSWNDmLK	R	K	0.99	2.23	0.434	2		m11: Oxidation (+15.99)	799.88	1597.74	1598.75	2	-3.701e-05	-0.02315	6897.16	99075.2	146541	137	149	TRUE
02_1	Uncategorized Sample	BioSample 1	02_1	g.16181 ORF g.16181 m.16181 type:5prime_partial len:245 (+) comp255541_c4_seq2:2-736(+)	m.16181	atrina_contam.fasta	27888.9	1	8	12	18	0.000376	0.332	possibly correct	TRUE	02_1.45931.45931.2	NEVIFSSWNDMLK	R	K	0.997	3.18	0.591	2			791.882	1581.75	1582.76	2	-0.000282	-0.1782	7600.08	440375	560457	137	149	TRUE
02_1	Uncategorized Sample	BioSample 1	02_1	g.16181 ORF g.16181 m.16181 type:5prime_partial len:245 (+) comp255541_c4_seq2:2-736(+)	m.16181	atrina_contam.fasta	27888.9	1	8	12	18	0.000376	0.332	possibly correct	TRUE	02_1.37082.37082.2	NEVIFSSWNDmLK	R	K	0.997	3.15	0.628	2		m11: Oxidation (+15.99)	799.878	1597.74	1598.75	2	-0.003837	-2.4	6304.92	265859	271081	137	149	TRUE
02_1	Uncategorized Sample	BioSample 1	02_1	g.16181 ORF g.16181 m.16181 type:5prime_partial len:245 (+) comp255541_c4_seq2:2-736(+)	m.16181	atrina_contam.fasta	27888.9	1	8	12	18	0.000376	0.332	possibly correct	TRUE	02_1.9631.9631.2	QAYLSGMK	K	G	0.99	2.18	0.471	2			449.228	896.442	897.45	2	-0.000744	-0.829	2611.87	1248550	1160910	97	104	TRUE
02_1	Uncategorized Sample	BioSample 1	02_1	g.16175 ORF g.16175 m.16175 type:complete len:506 (+) comp255540_c0_seq1:79-1596(+)	m.16175	atrina_contam.fasta	54738.5	0.999	1	1	1	2.09e-05	0.0158	possibly correct	TRUE	02_1.11351.11351.2	VPASPFAK	K	K	0.978	1.43	0.514	2			408.734	815.454	816.461	2	-0.000469	-0.5744	2841.4	225264	141577	223	230	TRUE
02_1	Uncategorized Sample	BioSample 1	02_1	g.16099 ORF g.16099 m.16099 type:complete len:784 (+) comp255487_c0_seq1:160-2511(+)	m.16099,m.16101	atrina_contam.fasta	88442.1	1	2	2	2	4.18e-05	0.0307	possibly correct	TRUE	02_1.36079.36079.2	DILNcVFTR	R	E	0.976	1.88	0.391	2	c5: Carbamidomethyl (+57.02)		569.29	1136.57	1137.57	2	0.0001227	0.1079	6165.54	132255	50526	640	648	TRUE
02_1	Uncategorized Sample	BioSample 1	02_1	g.16099 ORF g.16099 m.16099 type:complete len:784 (+) comp255487_c0_seq1:160-2511(+)	m.16099,m.16101	atrina_contam.fasta	88442.1	1	2	2	2	4.18e-05	0.0307	possibly correct	TRUE	02_1.46940.46940.2	LNDPNTGPLDLNFFK	K	Y	0.997	2.21	0.576	2			852.933	1703.85	1704.86	2	-0.000722	-0.4235	7767.74	105657	67938	510	524	TRUE
02_1	Uncategorized Sample	BioSample 1	02_1	g.812 ORF g.812 m.812 type:internal len:161 (+) comp167912_c0_seq1:2-487(+)	m.812	atrina_contam.fasta	18036.7	1	1	1	1	2.09e-05	0.112	possibly correct	TRUE	02_1.48906.48906.2	AVGDIFWDDGVSIGTIEK	K	G	0.993	2.28	0.581	2			961.482	1920.95	1921.95	2	0.001672	0.8699	8109.37	97043	66867	123	140	TRUE
02_1	Uncategorized Sample	BioSample 1	02_1	g.14972 ORF g.14972 m.14972 type:5prime_partial len:324 (+) comp254731_c5_seq4:2-973(+)	m.14972	atrina_contam.fasta	34658.5	1	4	4	4	8.35e-05	0.226	possibly correct	TRUE	02_1.37088.37088.2	AIGATPFAAGEYTVDcNSIPK	K	L	0.997	3.6	0.648	2	c16: Carbamidomethyl (+57.02)		1092.03	2182.04	2182.05	2	1.001	-0.6028	6305.83	384628	469228	227	247	TRUE
02_1	Uncategorized Sample	BioSample 1	02_1	g.14972 ORF g.14972 m.14972 type:5prime_partial len:324 (+) comp254731_c5_seq4:2-973(+)	m.14972	atrina_contam.fasta	34658.5	1	4	4	4	8.35e-05	0.226	possibly correct	TRUE	02_1.36727.36727.2	DQTFAEATSQPGITFVAAK	K	F	0.997	3.96	0.536	2			991.999	1981.98	1981.99	2	1.005	0.9326	6255.73	256161	360400	89	107	TRUE
02_1	Uncategorized Sample	BioSample 1	02_1	g.14972 ORF g.14972 m.14972 type:5prime_partial len:324 (+) comp254731_c5_seq4:2-973(+)	m.14972	atrina_contam.fasta	34658.5	1	4	4	4	8.35e-05	0.226	possibly correct	TRUE	02_1.37170.37170.2	GGcNAIADTGTSLLAGPTAEIK	K	E	0.997	3.62	0.571	2	c3: Carbamidomethyl (+57.02)		1059.03	2116.05	2117.05	2	-0.0007523	-0.3554	6317.19	217190	342960	201	222	TRUE
02_1	Uncategorized Sample	BioSample 1	02_1	g.14972 ORF g.14972 m.14972 type:5prime_partial len:324 (+) comp254731_c5_seq4:2-973(+)	m.14972	atrina_contam.fasta	34658.5	1	4	4	4	8.35e-05	0.226	possibly correct	TRUE	02_1.5801.5801.2	MQGVTVGGTSK	K	Y	0.997	2.61	0.402	2			532.774	1063.53	1064.54	2	-0.000315	-0.2959	2102.11	992199	956782	187	197	TRUE
02_1	Uncategorized Sample	BioSample 1	02_1	g.4549 ORF g.4549 m.4549 type:3prime_partial len:2253 (+) comp238734_c0_seq1:86-6847(+)	m.4549	atrina_contam.fasta	248479	1	10	10	11	0.00023	0.0595	possibly correct	TRUE	02_1.7914.7914.2	AGQLFDSK	R	Y	0.977	2.15	0.384	2			433.224	864.433	865.442	2	-0.001022	-1.181	2384.07	357885	396300	2094	2101	TRUE
02_1	Uncategorized Sample	BioSample 1	02_1	g.4549 ORF g.4549 m.4549 type:3prime_partial len:2253 (+) comp238734_c0_seq1:86-6847(+)	m.4549	atrina_contam.fasta	248479	1	10	10	11	0.00023	0.0595	possibly correct	TRUE	02_1.25273.25273.2	DIVILPmNK	R	G	0.975	1.75	0.327	2		m7: Oxidation (+15.99)	529.8	1057.58	1058.59	2	8.899e-05	0.08407	4685.01	344612	302143	1247	1255	TRUE
02_1	Uncategorized Sample	BioSample 1	02_1	g.4549 ORF g.4549 m.4549 type:3prime_partial len:2253 (+) comp238734_c0_seq1:86-6847(+)	m.4549	atrina_contam.fasta	248479	1	10	10	11	0.00023	0.0595	possibly correct	TRUE	02_1.19288.19288.2	FAPGNScTGDAFVR	K	A	0.997	2.95	0.616	2	c7: Carbamidomethyl (+57.02)		749.84	1497.67	1498.67	2	-0.001019	-0.6801	3892.86	376092	553752	2080	2093	TRUE
02_1	Uncategorized Sample	BioSample 1	02_1	g.4549 ORF g.4549 m.4549 type:3prime_partial len:2253 (+) comp238734_c0_seq1:86-6847(+)	m.4549	atrina_contam.fasta	248479	1	10	10	11	0.00023	0.0595	possibly correct	TRUE	02_1.14544.14544.2	FSAPDESGTITR	K	I	0.994	2.3	0.441	2			640.81	1279.6	1280.61	2	0.000289	0.2257	3264.17	1062370	1209340	951	962	TRUE
02_1	Uncategorized Sample	BioSample 1	02_1	g.4549 ORF g.4549 m.4549 type:3prime_partial len:2253 (+) comp238734_c0_seq1:86-6847(+)	m.4549	atrina_contam.fasta	248479	1	10	10	11	0.00023	0.0595	possibly correct	TRUE	02_1.16683.16683.2	FTQANDAGVSFR	K	S	0.992	2.01	0.589	2			656.818	1311.62	1312.63	2	0.001259	0.9591	3547.73	133198	94526	1092	1103	TRUE
02_1	Uncategorized Sample	BioSample 1	02_1	g.4549 ORF g.4549 m.4549 type:3prime_partial len:2253 (+) comp238734_c0_seq1:86-6847(+)	m.4549	atrina_contam.fasta	248479	1	10	10	11	0.00023	0.0595	possibly correct	TRUE	02_1.16462.16462.2	FTQANDAGVSFR	K	S	0.997	3.02	0.575	2			656.818	1311.62	1312.63	2	0.000878	0.6689	3518.6	498752	380797	1092	1103	TRUE
02_1	Uncategorized Sample	BioSample 1	02_1	g.4549 ORF g.4549 m.4549 type:3prime_partial len:2253 (+) comp238734_c0_seq1:86-6847(+)	m.4549	atrina_contam.fasta	248479	1	10	10	11	0.00023	0.0595	possibly correct	TRUE	02_1.19169.19169.2	NVIFVNLHGGK	R	A	0.997	2.95	0.524	2			599.841	1197.67	1197.67	2	1.002	-0.9599	3877.1	457667	840993	777	787	TRUE
02_1	Uncategorized Sample	BioSample 1	02_1	g.4549 ORF g.4549 m.4549 type:3prime_partial len:2253 (+) comp238734_c0_seq1:86-6847(+)	m.4549	atrina_contam.fasta	248479	1	10	10	11	0.00023	0.0595	possibly correct	TRUE	02_1.20663.20663.3	SILVHPLNGGSPcPDLHQTQK	R	V	0.985	3.22	0.441	2	c13: Carbamidomethyl (+57.02)		767.054	2298.14	2298.17	3	0.9821	-8.962	4072.89	231928	317253	307	327	TRUE
02_1	Uncategorized Sample	BioSample 1	02_1	g.4549 ORF g.4549 m.4549 type:3prime_partial len:2253 (+) comp238734_c0_seq1:86-6847(+)	m.4549	atrina_contam.fasta	248479	1	10	10	11	0.00023	0.0595	possibly correct	TRUE	02_1.15376.15376.2	SVSEIQNAIR	K	S	0.995	2.47	0.424	2			558.805	1115.59	1116.6	2	0.000998	0.8938	3374.33	1021580	585221	2067	2076	TRUE
02_1	Uncategorized Sample	BioSample 1	02_1	g.4549 ORF g.4549 m.4549 type:3prime_partial len:2253 (+) comp238734_c0_seq1:86-6847(+)	m.4549	atrina_contam.fasta	248479	1	10	10	11	0.00023	0.0595	possibly correct	TRUE	02_1.36550.36550.3	YVEVFPLSGGKPcPILR	R	Q	0.997	4.01	0.473	2	c13: Carbamidomethyl (+57.02)		644.686	1931.03	1932.04	3	0.0008357	0.4325	6231.25	619077	1610310	1670	1686	TRUE
02_1	Uncategorized Sample	BioSample 1	02_1	g.4549 ORF g.4549 m.4549 type:3prime_partial len:2253 (+) comp238734_c0_seq1:86-6847(+)	m.4549	atrina_contam.fasta	248479	1	10	10	11	0.00023	0.0595	possibly correct	TRUE	02_1.39913.39913.3	YVIINPLNGGEAcPHLLETR	R	K	0.997	3.41	0.49	2	c13: Carbamidomethyl (+57.02)		756.389	2266.14	2266.17	3	0.986	-7.381	6706.29	342326	268987	1012	1031	TRUE
02_1	Uncategorized Sample	BioSample 1	02_1	g.14904 ORF g.14904 m.14904 type:5prime_partial len:416 (+) comp254696_c0_seq1:1-1248(+)	m.14904,m.14905	atrina_contam.fasta	43716.6	1	2	2	2	4.18e-05	0.0554	possibly correct	TRUE	02_1.34201.34201.2	NVIITPGYGLcVAK	K	A	0.978	2.34	0.39	2	c11: Carbamidomethyl (+57.02)		752.913	1503.81	1504.82	2	-8.73e-05	-0.05801	5904.1	189669	186000	254	267	TRUE
02_1	Uncategorized Sample	BioSample 1	02_1	g.14904 ORF g.14904 m.14904 type:5prime_partial len:416 (+) comp254696_c0_seq1:1-1248(+)	m.14904,m.14905	atrina_contam.fasta	43716.6	1	2	2	2	4.18e-05	0.0554	possibly correct	TRUE	02_1.23356.23356.2	SEPLLLPGR	K	H	0.987	1.51	0.567	2			491.29	980.565	981.573	2	-0.000342	-0.3484	4428.6	939794	110383	97	105	TRUE
02_1	Uncategorized Sample	BioSample 1	02_1	g.7351 ORF g.7351 m.7351 type:internal len:276 (+) comp246645_c0_seq1:3-833(+)	m.7351	atrina_contam.fasta	30489.8	1	5	5	5	0.000104	0.217	possibly correct	TRUE	02_1.45128.45128.2	AEELVLGDIIDVK	K	F	0.988	2.58	0.342	2			707.396	1412.78	1413.78	2	0.000402	0.2843	7471.02	145091	85249	161	173	TRUE
02_1	Uncategorized Sample	BioSample 1	02_1	g.7351 ORF g.7351 m.7351 type:internal len:276 (+) comp246645_c0_seq1:3-833(+)	m.7351	atrina_contam.fasta	30489.8	1	5	5	5	0.000104	0.217	possibly correct	TRUE	02_1.36824.36824.3	HNIKAEELVLGDIIDVK	K	F	0.997	3.24	0.494	2			636.027	1905.06	1906.06	3	0.002068	1.085	6269.2	129510	174430	157	173	TRUE
02_1	Uncategorized Sample	BioSample 1	02_1	g.7351 ORF g.7351 m.7351 type:internal len:276 (+) comp246645_c0_seq1:3-833(+)	m.7351	atrina_contam.fasta	30489.8	1	5	5	5	0.000104	0.217	possibly correct	TRUE	02_1.34809.34809.2	IANLASGLEVGETPIAK	R	E	0.997	4	0.695	2			841.97	1681.93	1682.93	2	0.000778	0.4623	5988.77	251637	450502	249	265	TRUE
02_1	Uncategorized Sample	BioSample 1	02_1	g.7351 ORF g.7351 m.7351 type:internal len:276 (+) comp246645_c0_seq1:3-833(+)	m.7351	atrina_contam.fasta	30489.8	1	5	5	5	0.000104	0.217	possibly correct	TRUE	02_1.35263.35263.2	SLVPQFAVVTR	K	N	0.992	1.94	0.541	2			608.857	1215.7	1216.7	2	0.000966	0.7939	6052.12	655623	581925	142	152	TRUE
02_1	Uncategorized Sample	BioSample 1	02_1	g.7351 ORF g.7351 m.7351 type:internal len:276 (+) comp246645_c0_seq1:3-833(+)	m.7351	atrina_contam.fasta	30489.8	1	5	5	5	0.000104	0.217	possibly correct	TRUE	02_1.7608.7608.2	VDNSSLTGESEPQTR	K	S	0.997	2.68	0.533	2			810.379	1618.74	1619.75	2	-0.000206	-0.1272	2344.01	224677	402273	192	206	TRUE
02_1	Uncategorized Sample	BioSample 1	02_1	g.5079 ORF g.5079 m.5079 type:internal len:116 (+) comp240485_c0_seq1:2-352(+)	m.5079	atrina_contam.fasta	12883.7	1	2	3	8	0.000167	0.293	possibly correct	TRUE	02_1.47768.47768.2	LIPPGVYYWSLPR	R	E	0.997	2.27	0.635	2			780.932	1559.85	1560.86	2	-0.001346	-0.8623	7913.67	245666	405454	31	43	TRUE
02_1	Uncategorized Sample	BioSample 1	02_1	g.5079 ORF g.5079 m.5079 type:internal len:116 (+) comp240485_c0_seq1:2-352(+)	m.5079	atrina_contam.fasta	12883.7	1	2	3	8	0.000167	0.293	possibly correct	TRUE	02_1.47540.47540.2	LIPPGVYYWSLPR	R	E	0.997	2.69	0.611	2			780.932	1559.85	1560.86	2	-0.000456	-0.2921	7872.51	1696430	3451910	31	43	TRUE
02_1	Uncategorized Sample	BioSample 1	02_1	g.5079 ORF g.5079 m.5079 type:internal len:116 (+) comp240485_c0_seq1:2-352(+)	m.5079	atrina_contam.fasta	12883.7	1	2	3	8	0.000167	0.293	possibly correct	TRUE	02_1.47662.47662.2	LIPPGVYYWSLPR	R	E	0.997	2.55	0.646	2			780.932	1559.85	1560.86	2	-0.000807	-0.517	7893.23	1117610	2070550	31	43	TRUE
02_1	Uncategorized Sample	BioSample 1	02_1	g.5079 ORF g.5079 m.5079 type:internal len:116 (+) comp240485_c0_seq1:2-352(+)	m.5079	atrina_contam.fasta	12883.7	1	2	3	8	0.000167	0.293	possibly correct	TRUE	02_1.47542.47542.2	LIPPGVYYWSLPR	R	E	0.997	2.58	0.658	2			780.932	1559.85	1560.86	2	-0.000547	-0.3504	7872.74	1696430	1973350	31	43	TRUE
02_1	Uncategorized Sample	BioSample 1	02_1	g.5079 ORF g.5079 m.5079 type:internal len:116 (+) comp240485_c0_seq1:2-352(+)	m.5079	atrina_contam.fasta	12883.7	1	2	3	8	0.000167	0.293	possibly correct	TRUE	02_1.47054.47054.3	YVELLTSGSYQNFYQVGDGLR	R	L	0.997	2.48	0.55	2			803.729	2408.16	2409.17	3	-0.000999	-0.4147	7787.74	75468.2	87832	10	30	TRUE
02_1	Uncategorized Sample	BioSample 1	02_1	g.5079 ORF g.5079 m.5079 type:internal len:116 (+) comp240485_c0_seq1:2-352(+)	m.5079	atrina_contam.fasta	12883.7	1	2	3	8	0.000167	0.293	possibly correct	TRUE	02_1.47277.47277.2	YVELLTSGSYQNFYQVGDGLR	R	L	0.997	4.46	0.72	2			1205.6	2409.18	2409.17	2	1.013	4.128	7827.48	76678.7	85806	10	30	TRUE
02_1	Uncategorized Sample	BioSample 1	02_1	g.5079 ORF g.5079 m.5079 type:internal len:116 (+) comp240485_c0_seq1:2-352(+)	m.5079	atrina_contam.fasta	12883.7	1	2	3	8	0.000167	0.293	possibly correct	TRUE	02_1.47046.47046.2	YVELLTSGSYQNFYQVGDGLR	R	L	0.997	4.67	0.668	2			1205.09	2408.16	2409.17	2	-0.000742	-0.308	7786.11	86271.3	133686	10	30	TRUE
02_1	Uncategorized Sample	BioSample 1	02_1	g.5079 ORF g.5079 m.5079 type:internal len:116 (+) comp240485_c0_seq1:2-352(+)	m.5079	atrina_contam.fasta	12883.7	1	2	3	8	0.000167	0.293	possibly correct	TRUE	02_1.47155.47155.2	YVELLTSGSYQNFYQVGDGLR	R	L	0.997	5.4	0.701	2			1205.09	2408.16	2409.17	2	-0.000993	-0.4122	7806.52	443486	657532	10	30	TRUE
02_1	Uncategorized Sample	BioSample 1	02_1	g.757 ORF g.757 m.757 type:3prime_partial len:130 (+) comp166335_c1_seq1:102-494(+)	m.757	atrina_contam.fasta	14676.8	1	4	4	4	8.35e-05	0.469	possibly correct	TRUE	02_1.32448.32448.3	DGKPLINSQYVQTDSDTGTITFR	K	G	0.997	4.34	0.582	2			852.759	2555.25	2556.26	3	0.003608	1.411	5660.37	234390	394431	67	89	TRUE
02_1	Uncategorized Sample	BioSample 1	02_1	g.757 ORF g.757 m.757 type:3prime_partial len:130 (+) comp166335_c1_seq1:102-494(+)	m.757	atrina_contam.fasta	14676.8	1	4	4	4	8.35e-05	0.469	possibly correct	TRUE	02_1.12149.12149.2	EALVLQcK	K	A	0.99	2.48	0.395	2	c7: Carbamidomethyl (+57.02)		480.763	959.512	960.518	2	0.0004757	0.4953	2946.58	504799	610331	47	54	TRUE
02_1	Uncategorized Sample	BioSample 1	02_1	g.757 ORF g.757 m.757 type:3prime_partial len:130 (+) comp166335_c1_seq1:102-494(+)	m.757	atrina_contam.fasta	14676.8	1	4	4	4	8.35e-05	0.469	possibly correct	TRUE	02_1.29526.29526.2	GITTPDYGQYQcFAR	R	N	0.997	2.93	0.651	2	c12: Carbamidomethyl (+57.02)		888.906	1775.8	1776.8	2	0.003478	1.957	5262.49	294181	537308	90	104	TRUE
02_1	Uncategorized Sample	BioSample 1	02_1	g.757 ORF g.757 m.757 type:3prime_partial len:130 (+) comp166335_c1_seq1:102-494(+)	m.757	atrina_contam.fasta	14676.8	1	4	4	4	8.35e-05	0.469	possibly correct	TRUE	02_1.46730.46730.2	NEFGVGVAPPFEMIR	R	A	0.997	2.84	0.463	2			831.919	1661.82	1662.83	2	0.000708	0.4258	7734.23	139129	233625	105	119	TRUE
02_1	Uncategorized Sample	BioSample 1	02_1	g.15434 ORF g.15434 m.15434 type:complete len:302 (+) comp254031_c0_seq3:429-1334(+)	m.15434,m.15435	atrina_contam.fasta	32591.2	1	3	3	3	6.27e-05	0.14	possibly correct	TRUE	02_1.48913.48913.2	ENLEDLTSLNLWR	K	S	0.994	2.6	0.514	2			801.909	1601.8	1602.81	2	-0.000771	-0.481	8110.78	94830	74768	7	19	TRUE
02_1	Uncategorized Sample	BioSample 1	02_1	g.15434 ORF g.15434 m.15434 type:complete len:302 (+) comp254031_c0_seq3:429-1334(+)	m.15434,m.15435	atrina_contam.fasta	32591.2	1	3	3	3	6.27e-05	0.14	possibly correct	TRUE	02_1.2717.2717.3	KEPEPEQQEDQVK	R	T	0.997	4.1	0.335	2			528.59	1582.75	1583.76	3	0.001815	1.146	1696.89	1194320	1461940	284	296	TRUE
02_1	Uncategorized Sample	BioSample 1	02_1	g.15434 ORF g.15434 m.15434 type:complete len:302 (+) comp254031_c0_seq3:429-1334(+)	m.15434,m.15435	atrina_contam.fasta	32591.2	1	3	3	3	6.27e-05	0.14	possibly correct	TRUE	02_1.19240.19240.3	TDKEPEKVEIIEIEER	K	K	0.997	5.29	0.577	2			653.01	1956.01	1957.01	3	0.002739	1.4	3886.53	743795	1492350	268	283	TRUE
02_1	Uncategorized Sample	BioSample 1	02_1	g.720 ORF g.720 m.720 type:5prime_partial len:509 (+) comp164361_c0_seq1:2-1528(+)	m.720	atrina_contam.fasta	54410.7	1	3	3	3	6.27e-05	0.0925	possibly correct	TRUE	02_1.54358.54358.2	FGNATSIVVWDLLGNQPLK	K	E	0.997	2.71	0.681	2			1036.56	2071.11	2072.12	2	-0.000575	-0.2775	9208.77	95494.3	74680	256	274	TRUE
02_1	Uncategorized Sample	BioSample 1	02_1	g.720 ORF g.720 m.720 type:5prime_partial len:509 (+) comp164361_c0_seq1:2-1528(+)	m.720	atrina_contam.fasta	54410.7	1	3	3	3	6.27e-05	0.0925	possibly correct	TRUE	02_1.29271.29271.2	LDANPEcTVILPR	R	D	0.997	3.16	0.434	2	c7: Carbamidomethyl (+57.02)		749.391	1496.77	1497.77	2	0.001036	0.6915	5228.94	391293	366389	334	346	TRUE
02_1	Uncategorized Sample	BioSample 1	02_1	g.720 ORF g.720 m.720 type:5prime_partial len:509 (+) comp164361_c0_seq1:2-1528(+)	m.720	atrina_contam.fasta	54410.7	1	3	3	3	6.27e-05	0.0925	possibly correct	TRUE	02_1.40926.40926.2	YDGPIGNNDYINFIK	K	L	0.985	2.61	0.459	2			871.925	1741.84	1742.84	2	0.003649	2.094	6849.91	265619	307905	278	292	TRUE
02_1	Uncategorized Sample	BioSample 1	02_1	g.4453 ORF g.4453 m.4453 type:complete len:757 (+) comp239176_c0_seq1:97-2367(+)	m.4453	atrina_contam.fasta	83651.4	1	5	5	5	0.000104	0.0622	possibly correct	TRUE	02_1.13605.13605.2	FAEDLASEPNR	R	I	0.997	2.66	0.607	2			624.797	1247.58	1248.59	2	0.000276	0.2211	3139.81	149412	268625	707	717	TRUE
02_1	Uncategorized Sample	BioSample 1	02_1	g.4453 ORF g.4453 m.4453 type:complete len:757 (+) comp239176_c0_seq1:97-2367(+)	m.4453	atrina_contam.fasta	83651.4	1	5	5	5	0.000104	0.0622	possibly correct	TRUE	02_1.21913.21913.2	IAIVITDGR	K	S	0.989	2.44	0.422	2			479.291	956.567	957.573	2	0.001178	1.23	4236.75	973973	812615	140	148	TRUE
02_1	Uncategorized Sample	BioSample 1	02_1	g.4453 ORF g.4453 m.4453 type:complete len:757 (+) comp239176_c0_seq1:97-2367(+)	m.4453	atrina_contam.fasta	83651.4	1	5	5	5	0.000104	0.0622	possibly correct	TRUE	02_1.7971.7971.2	STDTGIAIK	R	Y	0.987	1.88	0.359	2			453.251	904.487	905.494	2	-7e-05	-0.07731	2391.59	658933	793043	112	120	TRUE
02_1	Uncategorized Sample	BioSample 1	02_1	g.4453 ORF g.4453 m.4453 type:complete len:757 (+) comp239176_c0_seq1:97-2367(+)	m.4453	atrina_contam.fasta	83651.4	1	5	5	5	0.000104	0.0622	possibly correct	TRUE	02_1.20514.20514.2	TFAQLGSIK	K	D	0.994	2.06	0.539	2			482.777	963.54	964.546	2	0.000978	1.014	4053.46	310710	267790	200	208	TRUE
02_1	Uncategorized Sample	BioSample 1	02_1	g.4453 ORF g.4453 m.4453 type:complete len:757 (+) comp239176_c0_seq1:97-2367(+)	m.4453	atrina_contam.fasta	83651.4	1	5	5	5	0.000104	0.0622	possibly correct	TRUE	02_1.12867.12867.2	VGAVTFADR	R	Y	0.997	2.25	0.428	2			468.251	934.488	935.495	2	0.000564	0.6029	3042.09	1251270	879106	74	82	TRUE
02_1	Uncategorized Sample	BioSample 1	02_1	g.4430 ORF g.4430 m.4430 type:3prime_partial len:1231 (+) comp238525_c0_seq1:66-3761(+)	m.4430	atrina_contam.fasta	133636	1	1	1	1	2.09e-05	0.0162	possibly correct	TRUE	02_1.17739.17739.4	TVLVHPLNGGTAcPQLHQTR	R	K	0.997	3.26	0.512	2	c13: Carbamidomethyl (+57.02)		550.788	2199.12	2199.15	4	0.9828	-9.076	3687.46	1297540	450569	360	379	TRUE
[truncated: 5,504 more rows]

## Sheet: Gel fraction 2
03_2, Spectrum report created on 04/29/2020
Experiment: 03_2
	Peak List Generator: Unspecified
		Version: Unspecified
		Charge States Calculated: unknown
[truncated: 13,525 more rows]

## Sheet: Gel fraction 3
04_3, Spectrum report created on 04/29/2020
[truncated: 15,194 more rows]

[truncated: 3 more sheets: Gel fraction 4, Gel fraction 5, Gel fraction 6]
